# Supplementary material
Source: PubMed Central journal article supplement (PMC8939204)
Supplement: 12879_2022_7274_MOESM1_ESM.pdf [file 12879_2022_7274_MOESM1_ESM.pdf]

**The fine-scale associations between socioeconomic status, density, functionality, and spread of COVID-19 within a high-density city**

**Supplementary Information**

**Table S1.** The average values of the median income, higher-education rate, and population density of the TPUs with different rates of the cases in the Dancing/Singing Cluster. The income and higher-education rate generally increased with the rate of the cases in the Dancing/Singing Cluster. The groups of TPUs with the highest and lowest rates of cases did not follow this pattern, since these two groups contained over 20 TPUs with fewer than 3,000 persons. These small-population TPUs could have either high or low incomes, and they would be in the group with the highest rate of the cases (>0.35%) by containing only one case in the Dancing/Singing Cluster.

| Rate of the cases in the Dancing/Singing Cluster (‰ out of total population) | No. of TPUs | Average med_income | Average prop_higher_edu | Average den_population |
|------------------------------------------------------------------------------|-------------|--------------------|-------------------------|------------------------|
| 0                                                                            | 79          | 20457              | 0.219                   | 12,723                 |
| (0, 0.1]                                                                     | 60          | 18238              | 0.21                    | 50,131                 |
| (0.1, 0.2]                                                                   | 29          | 18081              | 0.207                   | 36,481                 |
| (0.2, 0.35]                                                                  | 28          | 27434              | 0.308                   | 36,139                 |
| >0.35                                                                        | 18          | 20944              | 0.247                   | 33,710                 |

Table S2. Full sets of resultant rules from the modified differential-evolution-based association rule mining algorithm DESigFAR. Rules take the form “antecedent  $\rightarrow$  consequent”. For example, rule 1 in Table S1a is “build\_area\_pp >75.706 (p55) &prop\_industrial <0.001 (p47)  $\rightarrow$  rate\_local12 >0.112 (p81)”, where p55 means the 55th percentile of rate\_local12 >0.112 (p81) values for all TPU-level areal units in Hong Kong. The descriptions of variables in the rules are given in Table 1. Rules are shown together with the values of four RIMs: support (supp), confidence (conf), leverage (lev), and improvement (imp). P is the P value of each rule in Chi-square test described in the Methods.

(a) Rules for wave-1 local case rate; POI accessibility was used

| No. | Antecedent                                                                | Consequent                         | Supp  | Conf | Lev   | Imp  | P        |
|-----|---------------------------------------------------------------------------|------------------------------------|-------|------|-------|------|----------|
| 1   | build_area_pp >75.706 (p55) &prop_industrial <0.001 (p47)                 | rate_local12 >0.112 (p81)          | 24.18 | 0.50 | 14.71 | 0.18 | 2.89E-05 |
| 2   | POI_pp_mall_mkt =4.008-16.323 (p46-86)                                    | rate_local12 >0.103 (p79)          | 32.90 | 0.38 | 14.35 | 0.16 | 4.33E-09 |
| 3   | prop_rural_set <0.008 (p56)                                               | rate_local12 >0.038 (p60)          | 61.34 | 0.52 | 13.81 | 0.12 | 6.93E-05 |
| 4   | POI_pp_telecom_elec =7.292-35.358 (p38-84)                                | rate_local12 >0.103 (p79)          | 33.88 | 0.35 | 13.47 | 0.14 | 3.13E-07 |
| 5   | POI_pp_sports =10.367-68.635 (p38-87)                                     | rate_local12 >0.106 (p80)          | 35.21 | 0.33 | 13.03 | 0.12 | 5.55E-06 |
| 6   | prop_industrial <0.001 (p47)                                              | rate_local12 >0.104 (p80)          | 33.96 | 0.34 | 12.94 | 0.13 | 3.96E-06 |
| 7   | POI_pp_edu =10.533-29.153 (p52-86)                                        | rate_local12 >0.103 (p79)          | 27.64 | 0.39 | 12.83 | 0.18 | 7.92E-08 |
| 8   | POI_pp_transport =27.804-75.207 (p51-82)                                  | rate_local12 >0.103 (p79)          | 26.40 | 0.40 | 12.38 | 0.19 | 1.88E-06 |
| 9   | build_area_pp >76.990 (p56)                                               | rate_local12 >0.116 (p81)          | 29.38 | 0.31 | 11.47 | 0.12 | 7.66E-06 |
| 10  | prop_private_resid >0.101 (p66)                                           | rate_local12 >0.046 (p63)          | 39.60 | 0.52 | 11.15 | 0.15 | 2.84E-06 |
| 11  | prop_preprim_edu <0.081 (p20)                                             | rate_local12 >0.115 (p81)          | 18.61 | 0.42 | 10.28 | 0.23 | 3.09E-06 |
| 12  | LU_entropy <0.543 (p46)                                                   | rate_local12 >0.106 (p80)          | 29.65 | 0.30 | 9.50  | 0.10 | 6.5E-05  |
| 13  | med_area_home >16.093 (p47)                                               | rate_local12 >0.136 (p85)          | 26.44 | 0.23 | 8.43  | 0.07 | 6.08E-05 |
| 14  | med_income >18518.024 (p62)                                               | rate_local12 >0.136 (p85)          | 20.40 | 0.24 | 7.24  | 0.09 | 5.54E-05 |
| 15  | prop_transport >0.335 (p87)                                               | rate_local12 >0.086 (p76)          | 13.08 | 0.51 | 6.76  | 0.26 | 5.1E-05  |
| 16  | gender_ratio >106.692 (p92)                                               | rate_local12 >0.107 (p81)          | 9.88  | 0.57 | 6.33  | 0.36 | 1.48E-05 |
| 17  | prop_business >0.111 (p92)                                                | rate_local12 >0.108 (p81)          | 9.94  | 0.55 | 6.32  | 0.35 | 1.48E-05 |
| 18  | prop_higher_edu >0.361 (p85)                                              | rate_local12 >0.143 (p86)          | 10.73 | 0.33 | 5.98  | 0.18 | 3.34E-05 |
| 19  | prop_gov_insti_faci =0.026-0.139 (p38-90) &POI_pp_mall_mkt >10.943 (p75)  | rate_local12 >0.107 (p81)          | 9.64  | 0.49 | 5.65  | 0.23 | 7.82E-05 |
| 20  | POI_pp_edu <19.348 (p74) &POI_pp_mall_mkt =9.973-30.551 (p70-94)          | rate_local12 >0.090 (p77)          | 7.90  | 0.58 | 4.66  | 0.24 | 2.44E-05 |
| 21  | POI_pp_sports <10.367 (p38)                                               | rate_local12 =0.005-0.106 (p45-80) | 58.75 | 0.73 | 31.44 | 0.39 | 0        |
| 22  | prop_preprim_edu =0.081-0.137 (p20-85) &POI_pp_telecom_elec <13.825 (p56) | rate_local12 =0.005-0.106 (p45-80) | 63.55 | 0.67 | 31.19 | 0.08 | 3.79E-05 |
| 23  | POI_pp_telecom_elec <7.292 (p38)                                          | rate_local12 =0.005-0.103 (p45-79) | 58.38 | 0.72 | 31.14 | 0.38 | 0        |

|    |                                                                                                                    |                                    |       |      |       |      |          |
|----|--------------------------------------------------------------------------------------------------------------------|------------------------------------|-------|------|-------|------|----------|
| 24 | prop_over65 =0.122-0.213 (p20-89)<br>&POI_pp_sports <10.589 (p38)                                                  | rate_local12 =0.005-0.116 (p45-81) | 53.21 | 0.84 | 30.66 | 0.10 | 4.84E-05 |
| 25 | den_public_trans =4.269-90.965 (p28-91)<br>&POI_pp_telecom_elec <14.517 (p58)                                      | rate_local12 =0.005-0.117 (p45-82) | 64.58 | 0.69 | 30.63 | 0.09 | 7.26E-06 |
| 26 | gender_ratio =87.668-97.836 (p11-77)<br>&POI_pp_transport <36.170 (p58)                                            | rate_local12 =0.006-0.104 (p45-80) | 63.46 | 0.65 | 30.57 | 0.09 | 7.32E-05 |
| 27 | den_road >5.702 (p27) &POI_pp_telecom_elec<br><13.365 (p54)                                                        | rate_local12 =0.005-0.108 (p45-81) | 63.10 | 0.67 | 30.53 | 0.07 | 2.39E-05 |
| 28 | gender_ratio =87.593-97.312 (p11-76)<br>&POI_pp_telecom_elec <13.575 (p55)<br>gender_ratio =87.457-99.480 (p11-79) | rate_local12 =0.005-0.100 (p45-78) | 60.69 | 0.66 | 30.51 | 0.08 | 5.19E-05 |
| 29 | &med_area_home <19.521 (p61)<br>&POI_pp_sports <28.415 (p66)                                                       | rate_local12 =0.005-0.104 (p45-80) | 60.19 | 0.68 | 30.49 | 0.07 | 3.33E-05 |
| 30 | prop_preprim_edu =0.081-0.135 (p21-85)<br>&POI_pp_transport <36.474 (p58)<br>med_area_home <17.998 (p55)           | rate_local12 =0.005-0.103 (p45-79) | 62.78 | 0.65 | 30.46 | 0.09 | 1.66E-05 |
| 31 | &den_public_trans =3.985-90.248 (p27-91)<br>&POI_pp_sports <26.288 (p64)<br>gender_ratio =87.711-98.931 (p11-79)   | rate_local12 =0.006-0.114 (p45-81) | 57.88 | 0.75 | 30.44 | 0.07 | 1.13E-05 |
| 32 | &med_area_home <19.205 (p61)<br>&POI_pp_mall_mkt <8.837 (p66)                                                      | rate_local12 =0.005-0.104 (p45-80) | 58.69 | 0.70 | 30.37 | 0.08 | 1.24E-05 |
| 33 | POI_pp_transport <16.151 (p36)                                                                                     | rate_local12 =0.005-0.103 (p45-79) | 56.03 | 0.73 | 30.33 | 0.39 | 0        |
| 34 | prop_over65 =0.128-0.214 (p24-89)<br>&POI_pp_telecom_elec <8.009 (p40)<br>gender_ratio =87.481-99.842 (p11-82)     | rate_local12 =0.005-0.117 (p45-82) | 53.36 | 0.83 | 30.32 | 0.11 | 6.79E-05 |
| 35 | &med_area_home <19.205 (p61) &POI_pp_edu<br><15.586 (p69)<br>gender_ratio =87.457-99.480 (p11-79)                  | rate_local12 =0.005-0.111 (p45-81) | 60.61 | 0.70 | 30.28 | 0.07 | 1.54E-05 |
| 36 | &med_area_home <19.520 (p61)<br>&POI_pp_transport <48.280 (p69)                                                    | rate_local12 =0.006-0.111 (p45-81) | 61.07 | 0.69 | 30.14 | 0.07 | 3.98E-05 |
| 37 | prop_over65 =0.128-0.214 (p24-89)<br>&POI_pp_transport <17.780 (p39)                                               | rate_local12 =0.005-0.114 (p45-81) | 52.11 | 0.84 | 30.11 | 0.12 | 3.75E-05 |
| 38 | den_public_trans =6.888-92.606 (p35-91)<br>&POI_pp_transport <34.910 (p57)                                         | rate_local12 =0.006-0.114 (p45-81) | 60.33 | 0.71 | 30.05 | 0.11 | 5.22E-06 |
| 39 | den_road >5.586 (p27) &POI_pp_transport<br><31.516 (p53)                                                           | rate_local12 =0.005-0.115 (p45-81) | 63.38 | 0.68 | 30.02 | 0.07 | 5.65E-05 |

|    |                                                                                                                     |                                    |       |      |       |      |          |  |
|----|---------------------------------------------------------------------------------------------------------------------|------------------------------------|-------|------|-------|------|----------|--|
|    | med_area_home <16.183 (p48)                                                                                         |                                    |       |      |       |      |          |  |
| 40 | &den_public_trans =4.501-90.772 (p29-91)<br>&POI_pp_edu <18.658 (p73)                                               | rate_local12 =0.005-0.117 (p45-82) | 56.19 | 0.77 | 30.00 | 0.08 | 1.32E-05 |  |
| 41 | prop_preprim_edu =0.081-0.138 (p20-86)<br>&POI_pp_sports <21.150 (p56)                                              | rate_local12 =0.005-0.103 (p45-79) | 61.32 | 0.65 | 29.96 | 0.08 | 2.66E-07 |  |
| 42 | prop_gov_insti_faci =0.013-0.144 (p29-91)<br>&POI_pp_transport <33.050 (p55)<br>med_area_home <16.183 (p48)         | rate_local12 =0.005-0.110 (p45-81) | 61.32 | 0.68 | 29.94 | 0.09 | 8.29E-05 |  |
| 43 | &den_public_trans =4.501-90.772 (p29-91)<br>&POI_pp_transport <41.284 (p63)<br>gender_ratio =87.457-99.480 (p11-79) | rate_local12 =0.005-0.117 (p45-82) | 55.90 | 0.77 | 29.90 | 0.07 | 2.7E-06  |  |
| 44 | &med_area_home <19.456 (p61)<br>&POI_pp_telecom_elec <21.356 (p71)                                                  | rate_local12 =0.006-0.103 (p45-79) | 59.94 | 0.66 | 29.76 | 0.06 | 4.24E-05 |  |
| 45 | den_public_trans =4.218-88.884 (p28-91)<br>&POI_pp_mall_mkt <8.288 (p64)                                            | rate_local12 =0.006-0.124 (p45-82) | 66.19 | 0.68 | 29.71 | 0.13 | 7.13E-08 |  |
| 46 | med_area_home <17.998 (p55)<br>&POI_pp_mall_mkt <8.471 (p65)<br>prop_over65 =0.117-0.212 (p16-89)                   | rate_local12 =0.005-0.119 (p45-82) | 63.15 | 0.69 | 29.68 | 0.13 | 1.03E-07 |  |
| 47 | &build_area_pp <88.565 (p62)<br>&POI_pp_transport <38.267 (p60)                                                     | rate_local12 =0.005-0.106 (p45-80) | 55.80 | 0.72 | 29.64 | 0.09 | 2.31E-05 |  |
| 48 | med_area_home <15.583 (p45)<br>&POI_pp_telecom_elec <13.365 (p54)                                                   | rate_local12 =0.004-0.112 (p45-81) | 56.13 | 0.74 | 29.59 | 0.13 | 2.89E-05 |  |
| 49 | med_area_home <15.505 (p45)<br>&POI_pp_transport <35.608 (p57)<br>prop_preprim_edu =0.081-0.135 (p21-85)            | rate_local12 =0.005-0.114 (p45-81) | 56.94 | 0.74 | 29.58 | 0.13 | 1.32E-05 |  |
| 50 | &build_area_pp <107.300 (p71)<br>&POI_pp_mall_mkt <8.948 (p66)                                                      | rate_local12 =0.006-0.114 (p45-81) | 61.03 | 0.69 | 29.55 | 0.07 | 3.45E-05 |  |
| 51 | den_public_trans =6.736-95.296 (p34-92)<br>&POI_pp_sports <23.417 (p59)                                             | rate_local12 =0.005-0.110 (p45-81) | 60.57 | 0.68 | 29.51 | 0.12 | 3.46E-05 |  |
| 52 | prop_preprim_edu =0.080-0.138 (p19-85)<br>&POI_pp_mall_mkt <4.227 (p47)<br>prop_preprim_edu =0.081-0.137 (p20-85)   | rate_local12 =0.005-0.106 (p45-80) | 57.31 | 0.70 | 29.47 | 0.07 | 8.32E-05 |  |
| 53 | &med_area_home <17.418 (p52)<br>&POI_pp_sports <26.094 (p64)                                                        | rate_local12 =0.004-0.105 (p45-80) | 54.24 | 0.74 | 29.46 | 0.08 | 9E-06    |  |
| 54 | gender_ratio =87.605-98.187 (p11-78)<br>&POI_pp_sports <23.667 (p59)                                                | rate_local12 =0.005-0.103 (p45-79) | 63.70 | 0.62 | 29.44 | 0.08 | 5.47E-05 |  |

|    |                                                                                                                 |                                    |       |      |       |      |          |
|----|-----------------------------------------------------------------------------------------------------------------|------------------------------------|-------|------|-------|------|----------|
| 55 | med_area_home <15.461 (p45) &POI_pp_sports <22.789 (p58)                                                        | rate_local12 =0.005-0.112 (p45-81) | 55.85 | 0.74 | 29.44 | 0.14 | 1.16E-06 |
| 56 | den_road >5.296 (p26) &POI_pp_mall_mkt <4.041 (p46)                                                             | rate_local12 =0.005-0.102 (p45-78) | 55.22 | 0.71 | 29.40 | 0.08 | 2.13E-05 |
| 57 | med_area_home <15.505 (p45) &POI_pp_edu <15.002 (p67)                                                           | rate_local12 =0.005-0.116 (p45-82) | 57.07 | 0.74 | 29.28 | 0.13 | 2.8E-07  |
| 58 | prop_preprim_edu =0.081-0.137 (p20-85)<br>&med_area_home <18.212 (p55)<br>&POI_pp_mall_mkt <8.545 (p65)         | rate_local12 =0.006-0.098 (p45-77) | 53.79 | 0.71 | 29.26 | 0.08 | 7.14E-06 |
| 59 | prop_preprim_edu =0.081-0.137 (p20-85)<br>&build_area_pp <102.463 (p68) &POI_pp_edu <14.107 (p64)               | rate_local12 =0.005-0.100 (p45-78) | 56.92 | 0.68 | 29.22 | 0.08 | 4.94E-05 |
| 60 | prop_over65 =0.117-0.212 (p16-89)<br>&build_area_pp <88.565 (p62) &POI_pp_sports <18.025 (p51)                  | rate_local12 =0.006-0.115 (p45-81) | 54.86 | 0.76 | 29.20 | 0.08 | 5.98E-05 |
| 61 | gender_ratio =87.587-97.703 (p11-77)<br>&prop_gov_insti_faci =0.016-0.142 (p31-91)<br>&POI_pp_edu <15.454 (p69) | rate_local12 =0.005-0.113 (p45-81) | 57.48 | 0.72 | 29.15 | 0.08 | 4.55E-05 |
| 62 | prop_gov_insti_faci =0.016-0.146 (p31-91)<br>&POI_pp_edu <13.036 (p59)                                          | rate_local12 =0.005-0.113 (p45-81) | 61.29 | 0.67 | 29.13 | 0.12 | 4.3E-06  |
| 63 | gender_ratio =87.162-99.098 (p11-79) &den_road >5.681 (p27) &POI_pp_mall_mkt <9.900 (p70)                       | rate_local12 =0.005-0.100 (p45-78) | 59.79 | 0.64 | 29.01 | 0.08 | 1.68E-05 |
| 64 | den_road >5.813 (p28) &POI_pp_sports <24.250 (p62)                                                              | rate_local12 =0.005-0.109 (p45-81) | 64.22 | 0.63 | 28.99 | 0.08 | 3.06E-06 |
| 65 | prop_over65 =0.120-0.211 (p19-89)<br>&prop_preprim_edu =0.082-0.136 (p21-85)<br>&POI_pp_transport <38.261 (p60) | rate_local12 =0.005-0.110 (p45-81) | 56.06 | 0.72 | 28.99 | 0.07 | 5.45E-05 |
| 66 | build_area_pp <62.130 (p50) &POI_pp_transport <29.120 (p51)                                                     | rate_local12 =0.005-0.111 (p45-81) | 56.65 | 0.71 | 28.93 | 0.10 | 6.4E-05  |
| 67 | gender_ratio =87.265-98.353 (p11-78)<br>&POI_pp_mall_mkt <4.554 (p48)                                           | rate_local12 =0.005-0.094 (p45-77) | 55.91 | 0.66 | 28.92 | 0.08 | 3.24E-05 |
| 68 | den_road >5.911 (p28) &build_area_pp <87.159 (p62) &POI_pp_edu <14.977 (p67)                                    | rate_local12 =0.005-0.114 (p45-81) | 58.08 | 0.70 | 28.82 | 0.08 | 4.41E-05 |
| 69 | den_road >5.584 (p27) &POI_pp_edu <12.877 (p59)                                                                 | rate_local12 =0.005-0.106 (p45-81) | 62.14 | 0.64 | 28.80 | 0.09 | 5.15E-07 |

|    |                                                                                                                                  |                                    |       |      |       |      |          |
|----|----------------------------------------------------------------------------------------------------------------------------------|------------------------------------|-------|------|-------|------|----------|
| 70 | prop_transport >0.055 (p33) &POI_pp_transport <33.033 (p55)<br>prop_over65 =0.123-0.208 (p21-87)                                 | rate_local12 =0.005-0.109 (p45-81) | 60.89 | 0.66 | 28.79 | 0.07 | 8.29E-05 |
| 71 | &build_area_pp <85.101 (p59)<br>&POI_pp_telecom_elec <11.917 (p51)                                                               | rate_local12 =0.005-0.116 (p45-81) | 52.25 | 0.80 | 28.77 | 0.08 | 4.46E-05 |
| 72 | gender_ratio =87.824-99.340 (p11-79) &den_road >5.702 (p27) &POI_pp_transport <48.852 (p70)<br>prop_over65 =0.117-0.212 (p16-89) | rate_local12 =0.006-0.108 (p45-81) | 61.36 | 0.65 | 28.76 | 0.06 | 1.99E-05 |
| 73 | &gender_ratio =87.732-98.813 (p11-78)<br>&POI_pp_edu <14.968 (p67)                                                               | rate_local12 =0.005-0.108 (p45-81) | 58.89 | 0.67 | 28.72 | 0.08 | 2.12E-05 |
| 74 | prop_gov_insti_faci =0.026-0.139 (p38-90)<br>&POI_pp_telecom_elec <13.575 (p55)<br>gender_ratio =87.182-97.302 (p11-76)          | rate_local12 =0.005-0.124 (p45-82) | 58.54 | 0.73 | 28.66 | 0.10 | 7.59E-05 |
| 75 | &prop_gov_insti_faci =0.016-0.142 (p31-91)<br>&POI_pp_mall_mkt <10.308 (p72)<br>prop_preprim_edu =0.081-0.138 (p20-86)           | rate_local12 =0.006-0.102 (p45-79) | 55.18 | 0.69 | 28.61 | 0.09 | 5.14E-05 |
| 76 | &prop_gov_insti_faci =0.019-0.133 (p32-90)<br>&POI_pp_mall_mkt <7.643 (p63)<br>prop_preprim_edu =0.081-0.138 (p20-85)            | rate_local12 =0.006-0.099 (p45-78) | 52.20 | 0.72 | 28.58 | 0.07 | 4.18E-05 |
| 77 | &build_area_pp <106.529 (p71)<br>&POI_pp_telecom_elec <19.473 (p67)                                                              | rate_local12 =0.005-0.123 (p45-82) | 62.36 | 0.68 | 28.57 | 0.06 | 7.19E-05 |
| 78 | prop_gov_insti_faci =0.025-0.148 (p36-92)<br>&POI_pp_sports <24.093 (p62)<br>prop_preprim_edu =0.081-0.137 (p20-85)              | rate_local12 =0.005-0.117 (p45-82) | 59.66 | 0.69 | 28.56 | 0.12 | 2.57E-05 |
| 79 | &med_area_home <16.988 (p52) &POI_pp_edu <14.107 (p64)<br>den_public_trans =7.565-92.691 (p36-91)                                | rate_local12 =0.005-0.104 (p45-80) | 52.03 | 0.74 | 28.53 | 0.07 | 1.38E-05 |
| 80 | &build_area_pp <92.881 (p63) &POI_pp_edu <15.881 (p69)<br>gender_ratio =87.683-99.716 (p11-81)                                   | rate_local12 =0.005-0.112 (p45-81) | 55.19 | 0.72 | 28.48 | 0.08 | 3E-05    |
| 81 | &prop_preprim_edu =0.082-0.138 (p21-86)<br>&POI_pp_telecom_elec <21.311 (p71)                                                    | rate_local12 =0.005-0.103 (p45-79) | 58.68 | 0.65 | 28.46 | 0.07 | 1.97E-05 |
| 82 | den_population >14401.549 (p46)<br>&POI_pp_transport <34.255 (p57)                                                               | rate_local12 =0.005-0.115 (p45-81) | 58.32 | 0.70 | 28.45 | 0.10 | 3.14E-05 |

|           |                                                                                                                                  |                                    |       |      |       |      |          |  |
|-----------|----------------------------------------------------------------------------------------------------------------------------------|------------------------------------|-------|------|-------|------|----------|--|
|           | prop_over65 =0.110-0.204 (p11-84)                                                                                                |                                    |       |      |       |      |          |  |
| <b>83</b> | &med_area_home <19.802 (p65)<br>&POI_pp_telecom_elec <21.288 (p71)<br>gender_ratio =87.457-99.480 (p11-79)                       | rate_local12 =0.003-0.144 (p45-86) | 62.60 | 0.74 | 28.40 | 0.09 | 1.01E-05 |  |
| <b>84</b> | &prop_gov_insti_faci =0.015-0.133 (p31-90)<br>&POI_pp_transport <48.280 (p69)                                                    | rate_local12 =0.006-0.106 (p45-80) | 56.25 | 0.68 | 28.36 | 0.08 | 6.88E-05 |  |
| <b>85</b> | gender_ratio =87.077-98.124 (p11-78)<br>&POI_pp_edu <12.877 (p59)                                                                | rate_local12 =0.006-0.100 (p45-78) | 61.01 | 0.62 | 28.33 | 0.08 | 2.24E-05 |  |
| <b>86</b> | den_population >14284.410 (p45)<br>&POI_pp_telecom_elec <12.938 (p53)<br>prop_over65 =0.117-0.212 (p16-89)                       | rate_local12 =0.005-0.114 (p45-81) | 57.05 | 0.70 | 28.31 | 0.09 | 5.8E-05  |  |
| <b>87</b> | &gender_ratio =87.732-98.813 (p11-78)<br>&POI_pp_transport <50.942 (p71)<br>prop_higher_edu <0.334 (p79)                         | rate_local12 =0.005-0.108 (p45-81) | 59.50 | 0.66 | 28.29 | 0.08 | 3.28E-05 |  |
| <b>88</b> | &prop_open_recreation =0.017-0.146 (p36-89)<br>&POI_pp_transport <31.516 (p53)<br>prop_over65 =0.116-0.211 (p16-89)              | rate_local12 =0.005-0.120 (p45-82) | 52.40 | 0.79 | 28.23 | 0.07 | 2.53E-06 |  |
| <b>89</b> | &med_area_home <20.542 (p68)<br>&POI_pp_transport <57.981 (p76)<br>prop_higher_edu <0.310 (p76)                                  | rate_local12 =0.007-0.149 (p45-87) | 65.83 | 0.71 | 28.21 | 0.09 | 1.3E-05  |  |
| <b>90</b> | &prop_open_recreation =0.019-0.159 (p36-90)<br>&POI_pp_telecom_elec <12.094 (p51)<br>prop_over65 =0.129-0.215 (p26-91) &den_road | rate_local12 =0.006-0.119 (p45-82) | 50.97 | 0.81 | 28.20 | 0.09 | 1.55E-05 |  |
| <b>91</b> | >5.176 (p25) &POI_pp_telecom_elec <15.046 (p58)                                                                                  | rate_local12 =0.006-0.119 (p45-82) | 54.47 | 0.75 | 28.20 | 0.06 | 7.52E-05 |  |
| <b>92</b> | gender_ratio =86.809-98.970 (p11-79) &den_road >5.656 (p27) &POI_pp_edu <18.524 (p72)<br>prop_over65 =0.117-0.212 (p16-89)       | rate_local12 =0.005-0.106 (p45-80) | 61.01 | 0.63 | 28.16 | 0.07 | 4.02E-05 |  |
| <b>93</b> | &build_area_pp <89.794 (p62)<br>&POI_pp_mall_mkt <6.720 (p57)<br>gender_ratio =87.755-99.437 (p11-79) &den_road                  | rate_local12 =0.005-0.120 (p45-82) | 55.87 | 0.73 | 28.07 | 0.08 | 5.62E-05 |  |
| <b>94</b> | >5.702 (p27) &POI_pp_telecom_elec <22.112 (p72)<br>prop_over65 =0.106-0.205 (p11-85)                                             | rate_local12 =0.006-0.107 (p45-81) | 61.87 | 0.63 | 28.06 | 0.06 | 2.37E-05 |  |
| <b>95</b> | &prop_preprim_edu =0.081-0.137 (p20-85)<br>&POI_pp_telecom_elec <21.288 (p71)                                                    | rate_local12 =0.006-0.117 (p45-82) | 60.67 | 0.67 | 28.03 | 0.06 | 6.15E-05 |  |

|            |                                                                                                                  |                                    |       |      |       |      |          |  |
|------------|------------------------------------------------------------------------------------------------------------------|------------------------------------|-------|------|-------|------|----------|--|
|            | gender_ratio =87.588-98.254 (p11-78)                                                                             |                                    |       |      |       |      |          |  |
| <b>96</b>  | &build_area_pp <88.754 (p62)<br>&POI_pp_transport <57.174 (p76)<br>prop_higher_edu <0.320 (p79)                  | rate_local12 =0.005-0.110 (p45-81) | 59.02 | 0.66 | 28.03 | 0.08 | 5.26E-05 |  |
| <b>97</b>  | &prop_open_recreation =0.017-0.149 (p36-89)<br>&POI_pp_sports <22.889 (p58)<br>prop_over65 =0.123-0.211 (p21-89) | rate_local12 =0.005-0.117 (p45-82) | 52.10 | 0.78 | 28.02 | 0.09 | 1.77E-05 |  |
| <b>98</b>  | &med_area_home <20.826 (p70)<br>&POI_pp_mall_mkt <4.366 (p47)                                                    | rate_local12 =0.006-0.113 (p45-81) | 51.01 | 0.78 | 28.01 | 0.06 | 7.8E-05  |  |
| <b>99</b>  | den_population >14851.623 (p46)<br>&POI_pp_sports <22.924 (p58)<br>gender_ratio =87.439-100.096 (p11-83)         | rate_local12 =0.006-0.117 (p45-82) | 58.15 | 0.69 | 27.95 | 0.11 | 2.34E-05 |  |
| <b>100</b> | &prop_preprim_edu =0.081-0.135 (p21-85)<br>&build_area_pp <107.300 (p71)<br>prop_over65 =0.120-0.212 (p19-89)    | rate_local12 =0.005-0.103 (p45-79) | 57.37 | 0.65 | 27.87 | 0.09 | 5.93E-06 |  |
| <b>101</b> | &den_public_trans =9.671-95.636 (p38-92)<br>&POI_pp_transport <37.816 (p60)                                      | rate_local12 =0.005-0.119 (p45-82) | 51.10 | 0.80 | 27.85 | 0.10 | 7.97E-06 |  |
| <b>102</b> | build_area_pp <62.130 (p50) &POI_pp_mall_mkt<br><6.541 (p57)<br>gender_ratio =87.394-100.433 (p11-83)            | rate_local12 =0.006-0.111 (p45-81) | 56.45 | 0.69 | 27.85 | 0.13 | 1E-05    |  |
| <b>103</b> | &prop_preprim_edu =0.081-0.135 (p21-85)<br>&med_area_home <17.144 (p52)                                          | rate_local12 =0.005-0.103 (p45-79) | 51.85 | 0.72 | 27.83 | 0.08 | 3.06E-05 |  |
| <b>104</b> | den_population >15872.761 (p47)<br>&POI_pp_mall_mkt <7.824 (p63)                                                 | rate_local12 =0.005-0.115 (p45-81) | 56.86 | 0.70 | 27.77 | 0.16 | 3.06E-08 |  |
| <b>105</b> | den_public_trans =6.736-95.296 (p34-92)<br>&POI_pp_edu <14.618 (p67)                                             | rate_local12 =0.005-0.117 (p45-82) | 61.05 | 0.66 | 27.74 | 0.13 | 9.52E-06 |  |
| <b>106</b> | prop_transport >0.076 (p36) &POI_pp_mall_mkt<br><7.469 (p61)<br>gender_ratio =87.588-98.254 (p11-78)             | rate_local12 =0.005-0.104 (p45-80) | 57.16 | 0.65 | 27.73 | 0.13 | 1.36E-05 |  |
| <b>107</b> | &build_area_pp <88.754 (p62) &POI_pp_edu<br><20.320 (p76)<br>prop_over65 =0.126-0.212 (p23-89)                   | rate_local12 =0.005-0.111 (p45-81) | 59.32 | 0.66 | 27.70 | 0.07 | 7.17E-05 |  |
| <b>108</b> | &build_area_pp <89.825 (p62) &POI_pp_edu<br><14.949 (p67)<br>prop_over65 =0.117-0.212 (p16-89)                   | rate_local12 =0.005-0.120 (p45-82) | 54.37 | 0.74 | 27.68 | 0.11 | 5.14E-05 |  |
| <b>109</b> | &den_public_trans =9.671-95.636 (p38-92)<br>&POI_pp_sports <25.232 (p62)                                         | rate_local12 =0.005-0.113 (p45-81) | 51.16 | 0.77 | 27.63 | 0.09 | 1.29E-05 |  |



|     |                                                                                                                  |                                    |       |      |       |      |          |
|-----|------------------------------------------------------------------------------------------------------------------|------------------------------------|-------|------|-------|------|----------|
| 110 | prop_over65 =0.129-0.215 (p26-91) &den_road >5.180 (p25) &POI_pp_transport <39.159 (p61)                         | rate_local12 =0.005-0.120 (p45-82) | 54.90 | 0.73 | 27.63 | 0.06 | 6.62E-05 |
| 111 | prop_over65 =0.129-0.215 (p26-91) &den_road >5.180 (p25) &POI_pp_mall_mkt <3.972 (p46)                           | rate_local12 =0.005-0.112 (p45-81) | 47.56 | 0.84 | 27.63 | 0.09 | 1.95E-06 |
| 112 | build_area_pp <57.444 (p46) &POI_pp_sports <22.558 (p57)                                                         | rate_local12 =0.005-0.114 (p45-81) | 56.13 | 0.70 | 27.62 | 0.12 | 8.22E-05 |
| 113 | prop_transport >0.068 (p35) &POI_pp_sports <26.365 (p64)                                                         | rate_local12 =0.005-0.108 (p45-81) | 61.46 | 0.62 | 27.53 | 0.10 | 8.25E-05 |
| 114 | build_area_pp <62.130 (p50) &POI_pp_edu <12.894 (p59)                                                            | rate_local12 =0.005-0.111 (p45-81) | 56.65 | 0.68 | 27.51 | 0.13 | 4.81E-05 |
| 115 | prop_preprim_edu =0.081-0.137 (p20-85) &POI_pp_edu <14.107 (p64)                                                 | rate_local12 =0.005-0.104 (p45-80) | 61.92 | 0.60 | 27.46 | 0.09 | 2.85E-06 |
| 116 | prop_transport >0.071 (p36) &POI_pp_edu <12.877 (p59)                                                            | rate_local12 =0.005-0.100 (p45-78) | 56.45 | 0.64 | 27.43 | 0.11 | 5.73E-05 |
| 117 | den_population >15872.761 (p47) &POI_pp_edu <13.254 (p60)                                                        | rate_local12 =0.005-0.116 (p45-81) | 56.59 | 0.70 | 27.43 | 0.14 | 2.09E-07 |
| 118 | prop_over65 =0.129-0.215 (p26-91) &den_road >5.180 (p25) &POI_pp_sports <23.099 (p59)                            | rate_local12 =0.005-0.113 (p45-81) | 52.72 | 0.74 | 27.43 | 0.07 | 5.13E-05 |
| 119 | prop_over65 =0.129-0.212 (p25-89) &POI_pp_mall_mkt <4.554 (p48)                                                  | rate_local12 =0.006-0.117 (p45-82) | 53.67 | 0.74 | 27.41 | 0.11 | 5.96E-05 |
| 120 | gender_ratio =87.683-99.716 (p11-81) &prop_preprim_edu =0.082-0.138 (p21-86) &POI_pp_mall_mkt <11.835 (p78)      | rate_local12 =0.005-0.103 (p45-79) | 59.22 | 0.62 | 27.39 | 0.06 | 4.47E-05 |
| 121 | gender_ratio =87.425-98.724 (p11-78) &build_area_pp <95.076 (p64) &POI_pp_telecom_elec <25.420 (p76)             | rate_local12 =0.004-0.102 (p45-79) | 59.20 | 0.62 | 27.37 | 0.06 | 7.36E-05 |
| 122 | gender_ratio =87.607-99.246 (p11-79) &den_public_trans =7.177-94.877 (p35-92) &POI_pp_telecom_elec <22.605 (p72) | rate_local12 =0.005-0.104 (p45-80) | 56.10 | 0.66 | 27.35 | 0.07 | 7.59E-05 |
| 123 | gender_ratio =87.169-100.269 (p11-83) &build_area_pp <93.213 (p63) &POI_pp_sports <37.539 (p75)                  | rate_local12 =0.005-0.101 (p45-78) | 59.52 | 0.61 | 27.33 | 0.06 | 7.88E-05 |
| 124 | prop_gov_insti_faci =0.026-0.139 (p38-90) &POI_pp_mall_mkt <5.609 (p53)                                          | rate_local12 =0.005-0.107 (p45-81) | 52.35 | 0.72 | 27.27 | 0.14 | 6.67E-06 |

|     |                                                                              |                                    |       |      |       |      |          |  |
|-----|------------------------------------------------------------------------------|------------------------------------|-------|------|-------|------|----------|--|
|     | prop_over65 =0.125-0.214 (p22-89)                                            |                                    |       |      |       |      |          |  |
| 125 | &den_population >15872.761 (p47)<br>&POI_pp_sports <24.142 (p62)             | rate_local12 =0.005-0.124 (p45-82) | 51.50 | 0.79 | 27.20 | 0.09 | 7.8E-05  |  |
| 126 | POI_pp_edu <6.132 (p40)                                                      | rate_local12 =0.005-0.103 (p45-79) | 54.68 | 0.67 | 27.19 | 0.33 | 0        |  |
|     | prop_over65 =0.129-0.212 (p25-89)                                            |                                    |       |      |       |      |          |  |
| 127 | &den_population >15872.761 (p47)<br>&POI_pp_telecom_elec <14.160 (p57)       | rate_local12 =0.005-0.125 (p45-82) | 50.48 | 0.81 | 27.16 | 0.09 | 2.96E-05 |  |
|     | prop_over65 =0.134-0.216 (p29-91)                                            |                                    |       |      |       |      |          |  |
| 128 | &prop_business =0.001-0.111 (p29-92)<br>&POI_pp_telecom_elec <16.509 (p60)   | rate_local12 =0.006-0.111 (p45-81) | 50.93 | 0.75 | 27.15 | 0.09 | 6.33E-05 |  |
|     | gender_ratio =87.585-98.104 (p11-78)                                         |                                    |       |      |       |      |          |  |
| 129 | &med_area_home <19.264 (p61)                                                 | rate_local12 =0.006-0.102 (p45-79) | 58.37 | 0.62 | 27.07 | 0.14 | 1.47E-08 |  |
|     | gender_ratio =87.251-100.572 (p11-83)                                        |                                    |       |      |       |      |          |  |
| 130 | &med_area_home <20.980 (p73)<br>&den_public_trans =5.241-90.538 (p32-91)     | rate_local12 =0.006-0.103 (p45-79) | 54.66 | 0.66 | 27.04 | 0.08 | 2.63E-05 |  |
|     | gender_ratio =87.835-98.216 (p11-78)                                         |                                    |       |      |       |      |          |  |
| 131 | &den_public_trans =4.834-84.999 (p30-91)<br>&POI_pp_mall_mkt <11.542 (p76)   | rate_local12 =0.004-0.105 (p45-80) | 56.31 | 0.65 | 27.03 | 0.08 | 6.94E-05 |  |
|     | prop_higher_edu <0.310 (p76)                                                 |                                    |       |      |       |      |          |  |
| 132 | &prop_open_recreation =0.019-0.159 (p36-90)<br>&POI_pp_edu <15.665 (p69)     | rate_local12 =0.006-0.120 (p45-82) | 52.33 | 0.75 | 26.99 | 0.10 | 4.9E-05  |  |
|     | prop_open_recreation =0.017-0.146 (p36-89)                                   |                                    |       |      |       |      |          |  |
| 133 | &POI_pp_transport <31.516 (p53)                                              | rate_local12 =0.005-0.120 (p45-82) | 54.63 | 0.72 | 26.98 | 0.10 | 7.42E-05 |  |
|     | prop_higher_edu <0.315 (p78)                                                 |                                    |       |      |       |      |          |  |
| 134 | &prop_open_recreation =0.016-0.154 (p36-90)<br>&POI_pp_mall_mkt <9.453 (p67) | rate_local12 =0.006-0.132 (p45-83) | 54.58 | 0.76 | 26.98 | 0.08 | 4.95E-05 |  |
|     | prop_over65 =0.117-0.212 (p16-89)                                            |                                    |       |      |       |      |          |  |
| 135 | &POI_pp_edu <13.746 (p61)                                                    | rate_local12 =0.005-0.125 (p45-82) | 65.06 | 0.64 | 26.97 | 0.08 | 4.74E-05 |  |
|     | prop_open_recreation =0.017-0.143 (p36-88)                                   |                                    |       |      |       |      |          |  |
| 136 | &POI_pp_telecom_elec <13.739 (p55)                                           | rate_local12 =0.006-0.131 (p45-83) | 56.22 | 0.74 | 26.93 | 0.11 | 3.7E-05  |  |
|     | prop_over65 =0.121-0.212 (p20-89)                                            |                                    |       |      |       |      |          |  |
| 137 | &prop_preprim_edu =0.080-0.138 (p19-86)<br>&build_area_pp <102.210 (p67)     | rate_local12 =0.005-0.115 (p45-81) | 55.77 | 0.69 | 26.88 | 0.11 | 6.11E-06 |  |
|     | prop_over65 =0.117-0.212 (p16-89)                                            |                                    |       |      |       |      |          |  |
| 138 | &med_area_home <19.775 (p65) &build_area_pp<br><88.565 (p62)                 | rate_local12 =0.005-0.131 (p45-83) | 56.88 | 0.72 | 26.85 | 0.10 | 5.8E-05  |  |

|     |                                                                                                                            |                                    |       |      |       |      |          |
|-----|----------------------------------------------------------------------------------------------------------------------------|------------------------------------|-------|------|-------|------|----------|
| 139 | prop_over65 =0.117-0.212 (p16-89)<br>&med_area_home <15.226 (p45)                                                          | rate_local12 =0.005-0.125 (p45-82) | 54.08 | 0.74 | 26.83 | 0.10 | 5.44E-06 |
| 140 | prop_open_recreation =0.017-0.154 (p36-90)<br>&POI_pp_edu <12.877 (p59)<br>med_income <19678.979 (p65)                     | rate_local12 =0.005-0.121 (p45-82) | 55.40 | 0.71 | 26.83 | 0.14 | 1.99E-05 |
| 141 | &prop_open_recreation =0.014-0.146 (p34-89)<br>&POI_pp_telecom_elec <11.657 (p50)<br>prop_over65 =0.117-0.212 (p16-89)     | rate_local12 =0.005-0.122 (p45-82) | 49.37 | 0.81 | 26.81 | 0.08 | 1.21E-05 |
| 142 | &den_public_trans =9.671-95.636 (p38-92)<br>&POI_pp_edu <13.746 (p61)<br>prop_over65 =0.117-0.213 (p16-89)                 | rate_local12 =0.005-0.114 (p45-81) | 50.28 | 0.76 | 26.80 | 0.09 | 2.28E-05 |
| 143 | &gender_ratio =87.588-98.254 (p11-78)<br>&POI_pp_sports <38.840 (p77)<br>prop_preprim_edu =0.081-0.136 (p21-85)            | rate_local12 =0.006-0.110 (p45-81) | 59.26 | 0.63 | 26.75 | 0.08 | 7.47E-05 |
| 144 | &den_road =5.778-21.939 (p28-86)<br>&POI_pp_mall_mkt <8.083 (p64)<br>prop_over65 =0.129-0.215 (p26-91)                     | rate_local12 =0.006-0.098 (p45-78) | 49.07 | 0.71 | 26.61 | 0.09 | 1.65E-05 |
| 145 | &den_population >16064.342 (p48)<br>&POI_pp_edu <14.779 (p67)<br>den_public_trans =7.631-93.088 (p36-92)                   | rate_local12 =0.005-0.125 (p45-82) | 51.17 | 0.78 | 26.61 | 0.09 | 3.43E-05 |
| 146 | &prop_gov_insti_faci =0.015-0.131 (p30-89)<br>&POI_pp_edu <19.826 (p75)<br>gender_ratio =87.008-100.319 (p11-83)           | rate_local12 =0.006-0.109 (p45-81) | 53.20 | 0.69 | 26.49 | 0.08 | 8.29E-05 |
| 147 | &med_area_home <19.205 (p61)<br>&prop_gov_insti_faci =0.008-0.127 (p21-88)<br>prop_over65 =0.123-0.216 (p21-91)            | rate_local12 =0.005-0.096 (p45-77) | 52.45 | 0.65 | 26.48 | 0.06 | 1.66E-05 |
| 148 | &den_public_trans =7.206-96.133 (p35-92)<br>&POI_pp_mall_mkt <4.821 (p49)<br>gender_ratio =87.587-97.703 (p11-77)          | rate_local12 =0.006-0.118 (p45-82) | 46.98 | 0.83 | 26.47 | 0.10 | 7.62E-05 |
| 149 | &prop_preprim_edu =0.081-0.138 (p20-85)<br>&prop_gov_insti_faci =0.016-0.142 (p31-91)<br>prop_over65 =0.106-0.205 (p11-85) | rate_local12 =0.005-0.103 (p45-79) | 50.80 | 0.70 | 26.47 | 0.10 | 8.34E-06 |
| 150 | &gender_ratio =87.499-98.661 (p11-78)<br>&prop_preprim_edu =0.081-0.137 (p20-85)<br>build_area_pp <90.950 (p62)            | rate_local12 =0.005-0.106 (p45-80) | 55.44 | 0.65 | 26.46 | 0.08 | 4.94E-05 |
| 151 | &prop_gov_insti_faci =0.009-0.141 (p21-91)<br>&POI_pp_transport <59.920 (p78)                                              | rate_local12 =0.005-0.108 (p45-81) | 56.83 | 0.64 | 26.45 | 0.08 | 5.49E-05 |

|     |                                                                                                                   |                                    |       |      |       |      |          |  |
|-----|-------------------------------------------------------------------------------------------------------------------|------------------------------------|-------|------|-------|------|----------|--|
|     | prop_over65 =0.137-0.211 (p31-89)                                                                                 |                                    |       |      |       |      |          |  |
| 152 | &prop_preprim_edu =0.081-0.138 (p20-86)<br>&POI_pp_sports <21.150 (p56)                                           | rate_local12 =0.005-0.104 (p45-80) | 47.57 | 0.75 | 26.34 | 0.08 | 6.95E-05 |  |
| 153 | build_area_pp <62.119 (p50)<br>&POI_pp_telecom_elec <20.153 (p68)                                                 | rate_local12 =0.005-0.119 (p45-82) | 60.20 | 0.64 | 26.25 | 0.08 | 7.66E-05 |  |
| 154 | prop_open_recreation =0.017-0.143 (p36-88)<br>&POI_pp_mall_mkt <8.250 (p64)                                       | rate_local12 =0.005-0.121 (p45-82) | 55.14 | 0.70 | 26.23 | 0.16 | 4.4E-07  |  |
| 155 | gender_ratio =87.963-98.463 (p13-78)<br>&den_population >15872.761 (p47)<br>&POI_pp_transport <51.668 (p72)       | rate_local12 =0.005-0.105 (p45-80) | 52.72 | 0.67 | 26.22 | 0.06 | 8.13E-05 |  |
| 156 | prop_open_recreation =0.016-0.143 (p36-89)<br>&POI_pp_sports <23.662 (p59)                                        | rate_local12 =0.006-0.124 (p45-82) | 55.79 | 0.70 | 26.20 | 0.12 | 5.75E-05 |  |
| 157 | gender_ratio =87.620-99.262 (p11-79)<br>&den_public_trans =8.345-95.802 (p37-92)<br>&build_area_pp <112.199 (p72) | rate_local12 =0.005-0.108 (p45-81) | 53.53 | 0.67 | 26.15 | 0.07 | 5.8E-05  |  |
| 158 | gender_ratio =87.208-100.346 (p11-83)<br>&den_road >6.022 (p29) &build_area_pp<br><92.220 (p63)                   | rate_local12 =0.005-0.106 (p45-80) | 55.57 | 0.64 | 26.10 | 0.08 | 7.85E-05 |  |
| 159 | med_income <19678.979 (p65)<br>&prop_open_recreation =0.014-0.146 (p34-89)<br>&POI_pp_mall_mkt <9.163 (p66)       | rate_local12 =0.005-0.124 (p45-82) | 50.92 | 0.76 | 26.01 | 0.09 | 3.71E-05 |  |
| 160 | gender_ratio =87.307-100.667 (p11-84)<br>&prop_preprim_edu =0.081-0.137 (p20-85)<br>&den_road >5.813 (p28)        | rate_local12 =0.005-0.105 (p45-80) | 55.75 | 0.63 | 25.98 | 0.08 | 5.38E-05 |  |
| 161 | gender_ratio =87.963-98.463 (p13-78)<br>&den_population >15872.761 (p47)<br>&POI_pp_edu <19.468 (p74)             | rate_local12 =0.005-0.104 (p45-80) | 52.39 | 0.66 | 25.81 | 0.05 | 8.13E-05 |  |
| 162 | prop_over65 =0.136-0.216 (p31-91)<br>&prop_transport >0.055 (p33) &POI_pp_sports<br><17.325 (p50)                 | rate_local12 =0.005-0.114 (p45-81) | 45.82 | 0.81 | 25.80 | 0.08 | 4.4E-05  |  |
| 163 | med_area_home <16.408 (p49) &LU_entropy<br>>0.538 (p44) &POI_pp_telecom_elec <16.099<br>(p59)                     | rate_local12 =0.005-0.090 (p45-77) | 44.39 | 0.74 | 25.76 | 0.09 | 3.94E-05 |  |
| 164 | gender_ratio =87.747-98.988 (p11-79)<br>&prop_higher_edu <0.306 (p76)<br>&den_public_trans =9.671-95.636 (p38-92) | rate_local12 =0.005-0.106 (p45-81) | 49.31 | 0.71 | 25.74 | 0.09 | 3.01E-05 |  |

|     |                                                                                                                            |                                    |       |      |       |      |          |
|-----|----------------------------------------------------------------------------------------------------------------------------|------------------------------------|-------|------|-------|------|----------|
| 165 | build_area_pp <89.794 (p62) &prop_business =0.001-0.111 (p29-92)                                                           | rate_local12 =0.006-0.105 (p45-80) | 59.08 | 0.60 | 25.66 | 0.12 | 3.97E-06 |
| 166 | prop_preprim_edu =0.081-0.138 (p20-86) &med_area_home <16.970 (p52)                                                        | rate_local12 =0.004-0.106 (p45-81) | 54.51 | 0.64 | 25.66 | 0.10 | 1.35E-06 |
| 167 | prop_over65 =0.117-0.212 (p16-89) &prop_business =0.003-0.111 (p43-92) &POI_pp_transport <45.188 (p69)                     | rate_local12 =0.005-0.127 (p45-83) | 50.71 | 0.76 | 25.59 | 0.10 | 3.8E-05  |
| 168 | prop_over65 =0.122-0.213 (p21-89) &prop_preprim_edu =0.081-0.137 (p20-85) &med_area_home <18.212 (p55)                     | rate_local12 =0.005-0.118 (p45-82) | 50.71 | 0.73 | 25.58 | 0.09 | 5.76E-06 |
| 169 | gender_ratio =87.588-98.254 (p11-78) &build_area_pp <88.754 (p62) &prop_transport >0.062 (p35)                             | rate_local12 =0.006-0.110 (p45-81) | 52.99 | 0.67 | 25.51 | 0.09 | 5.33E-05 |
| 170 | med_area_home <18.914 (p57) &LU_entropy >0.542 (p46) &POI_pp_sports <29.788 (p66)                                          | rate_local12 =0.005-0.096 (p45-77) | 47.11 | 0.70 | 25.45 | 0.09 | 8.18E-05 |
| 171 | gender_ratio =87.683-99.716 (p11-81) &prop_preprim_edu =0.082-0.138 (p21-86) &prop_open_recreation =0.013-0.147 (p33-89)   | rate_local12 =0.005-0.103 (p45-79) | 47.20 | 0.73 | 25.45 | 0.11 | 1.82E-05 |
| 172 | med_area_home <16.776 (p50) &LU_entropy >0.549 (p48) &POI_pp_mall_mkt <10.234 (p72)                                        | rate_local12 =0.005-0.097 (p45-77) | 44.48 | 0.76 | 25.39 | 0.08 | 4.2E-05  |
| 173 | prop_preprim_edu =0.080-0.139 (p19-86) &den_public_trans =7.565-92.691 (p36-91) &prop_gov_insti_faci =0.019-0.133 (p32-90) | rate_local12 =0.005-0.105 (p45-80) | 48.95 | 0.70 | 25.36 | 0.08 | 6.17E-05 |
| 174 | gender_ratio =87.864-98.787 (p11-78) &prop_higher_edu <0.315 (p78) &prop_open_recreation =0.016-0.154 (p36-90)             | rate_local12 =0.007-0.129 (p45-83) | 49.81 | 0.77 | 25.32 | 0.09 | 4.84E-05 |
| 175 | med_income <18862.550 (p62) &prop_open_recreation =0.018-0.143 (p36-89) &POI_pp_transport <30.172 (p52)                    | rate_local12 =0.006-0.124 (p45-82) | 46.51 | 0.82 | 25.30 | 0.08 | 5.81E-05 |
| 176 | prop_over65 =0.123-0.216 (p21-91) &den_public_trans =7.206-96.133 (p35-92) &build_area_pp <106.529 (p71)                   | rate_local12 =0.005-0.111 (p45-81) | 50.04 | 0.71 | 25.30 | 0.11 | 1.82E-05 |

|     |                                                                                                                   |                                    |       |      |       |      |          |
|-----|-------------------------------------------------------------------------------------------------------------------|------------------------------------|-------|------|-------|------|----------|
| 177 | prop_over65 =0.111-0.206 (p12-85) &den_road >5.381 (p26) &build_area_pp <86.041 (p61)                             | rate_local12 =0.005-0.113 (p45-81) | 52.45 | 0.68 | 25.18 | 0.09 | 5.41E-05 |
| 178 | prop_business =0.002-0.094 (p41-91) &POI_pp_mall_mkt <8.302 (p64)                                                 | rate_local12 =0.005-0.115 (p45-81) | 54.76 | 0.66 | 25.15 | 0.12 | 2.89E-05 |
| 179 | prop_higher_edu <0.350 (p83) &den_public_trans =5.199-95.141 (p32-92) &prop_open_recreation =0.014-0.146 (p34-89) | rate_local12 =0.005-0.119 (p45-82) | 49.74 | 0.73 | 25.12 | 0.12 | 2.09E-05 |
| 180 | prop_preprim_edu =0.081-0.136 (p20-85) &prop_gov_insti_faci =0.026-0.139 (p38-90) med_income <18399.947 (p61)     | rate_local12 =0.005-0.106 (p45-81) | 52.31 | 0.66 | 25.11 | 0.14 | 2E-06    |
| 181 | &prop_open_recreation =0.015-0.137 (p35-87) &POI_pp_edu <15.117 (p67)                                             | rate_local12 =0.005-0.132 (p45-83) | 48.30 | 0.80 | 25.07 | 0.11 | 1.94E-05 |
| 182 | prop_over65 =0.122-0.209 (p20-88) &den_population >14284.410 (p45) &build_area_pp <81.232 (p57)                   | rate_local12 =0.006-0.130 (p45-83) | 49.95 | 0.77 | 25.05 | 0.11 | 6.17E-05 |
| 183 | gender_ratio =87.587-97.703 (p11-77) &prop_gov_insti_faci =0.016-0.142 (p31-91) prop_business <0.058 (p86)        | rate_local12 =0.005-0.103 (p45-79) | 56.26 | 0.60 | 24.99 | 0.13 | 1.66E-06 |
| 184 | &prop_open_recreation =0.018-0.144 (p36-89) &POI_pp_telecom_elec <18.260 (p65)                                    | rate_local12 =0.005-0.106 (p45-80) | 48.87 | 0.69 | 24.95 | 0.07 | 5.66E-05 |
| 185 | den_public_trans =7.206-96.133 (p35-92) &build_area_pp <87.159 (p62)                                              | rate_local12 =0.006-0.112 (p45-81) | 55.30 | 0.64 | 24.94 | 0.13 | 2.81E-06 |
| 186 | med_area_home <18.994 (p58) &den_road =5.778-21.939 (p28-86) &POI_pp_edu <20.269 (p76)                            | rate_local12 =0.006-0.104 (p45-80) | 49.83 | 0.67 | 24.91 | 0.07 | 8.27E-05 |
| 187 | prop_over65 =0.106-0.205 (p11-85) &prop_preprim_edu =0.081-0.137 (p20-85) &den_population >14552.292 (p46)        | rate_local12 =0.005-0.119 (p45-82) | 50.53 | 0.72 | 24.88 | 0.10 | 1.51E-05 |
| 188 | prop_business =0.003-0.111 (p43-92) &POI_pp_transport <45.188 (p69)                                               | rate_local12 =0.005-0.108 (p45-81) | 55.13 | 0.63 | 24.84 | 0.09 | 4.86E-05 |
| 189 | prop_business =0.002-0.094 (p41-91) &POI_pp_edu <14.054 (p64)                                                     | rate_local12 =0.005-0.103 (p45-79) | 51.46 | 0.65 | 24.79 | 0.13 | 5.4E-05  |
| 190 | med_area_home <18.670 (p57) &build_area_pp <62.119 (p50)                                                          | rate_local12 =0.004-0.129 (p45-83) | 57.16 | 0.67 | 24.78 | 0.09 | 8.19E-05 |

|                                                                                                                  |                                    |       |      |       |      |          |  |  |
|------------------------------------------------------------------------------------------------------------------|------------------------------------|-------|------|-------|------|----------|--|--|
| prop_preprim_edu =0.081-0.138 (p20-85)                                                                           |                                    |       |      |       |      |          |  |  |
| <b>191</b> &med_area_home <16.776 (p50) &LU_entropy >0.549 (p48)                                                 | rate_local12 =0.005-0.088 (p45-76) | 41.11 | 0.77 | 24.67 | 0.11 | 1.3E-06  |  |  |
| <b>192</b> med_area_home <15.461 (p45) &prop_open_recreation =0.014-0.146 (p34-89)                               | rate_local12 =0.005-0.128 (p45-83) | 50.48 | 0.74 | 24.66 | 0.11 | 3.31E-05 |  |  |
| <b>193</b> gender_ratio =87.684-98.728 (p11-78) &prop_preprim_edu =0.081-0.136 (p21-85)                          | rate_local12 =0.006-0.110 (p45-81) | 60.64 | 0.58 | 24.59 | 0.10 | 1.32E-05 |  |  |
| gender_ratio =87.809-99.344 (p11-79)                                                                             |                                    |       |      |       |      |          |  |  |
| <b>194</b> &med_income <18399.947 (p61) &den_public_trans =8.785-97.322 (p38-92)                                 | rate_local12 =0.006-0.105 (p45-80) | 45.92 | 0.73 | 24.58 | 0.10 | 1.06E-05 |  |  |
| <b>195</b> prop_preprim_edu =0.081-0.135 (p21-85) &build_area_pp <105.614 (p70)                                  | rate_local12 =0.005-0.111 (p45-81) | 61.62 | 0.58 | 24.55 | 0.10 | 1.69E-05 |  |  |
| <b>196</b> prop_higher_edu <0.304 (p76) &build_area_pp <99.847 (p67) &prop_open_recreation =0.015-0.145 (p35-89) | rate_local12 =0.004-0.135 (p45-84) | 51.02 | 0.75 | 24.54 | 0.09 | 9.79E-06 |  |  |
| <b>197</b> prop_preprim_edu >0.077 (p16) &prop_open_recreation =0.014-0.146 (p34-89) &POI_pp_edu <21.521 (p79)   | rate_local12 =0.005-0.127 (p45-82) | 56.16 | 0.67 | 24.50 | 0.06 | 6.68E-05 |  |  |
| <b>198</b> gender_ratio =87.049-99.226 (p11-79) &prop_open_recreation =0.016-0.154 (p36-90)                      | rate_local12 =0.005-0.122 (p45-82) | 54.50 | 0.67 | 24.50 | 0.15 | 7.43E-08 |  |  |
| <b>199</b> prop_over65 =0.118-0.213 (p17-89) &prop_higher_edu <0.298 (p76) &den_population >14359.348 (p46)      | rate_local12 =0.006-0.134 (p45-84) | 52.51 | 0.73 | 24.49 | 0.09 | 5.98E-05 |  |  |
| <b>200</b> prop_higher_edu <0.309 (p76) &den_public_trans =6.527-94.144 (p34-92)                                 | rate_local12 =0.006-0.125 (p45-82) | 58.46 | 0.64 | 24.44 | 0.11 | 1.28E-05 |  |  |
| gender_ratio =87.489-97.990 (p11-78)                                                                             |                                    |       |      |       |      |          |  |  |
| <b>201</b> &prop_higher_edu <0.320 (p79) &prop_gov_insti_faci >0.025 (p36)                                       | rate_local12 =0.006-0.120 (p45-82) | 52.61 | 0.68 | 24.30 | 0.08 | 6.31E-05 |  |  |
| <b>202</b> med_area_home <17.043 (p52) &prop_business =0.003-0.052 (p43-86)                                      | rate_local12 =0.005-0.115 (p45-81) | 46.47 | 0.75 | 24.25 | 0.18 | 2.65E-07 |  |  |
| prop_over65 =0.117-0.212 (p16-89)                                                                                |                                    |       |      |       |      |          |  |  |
| <b>203</b> &prop_preprim_edu =0.081-0.137 (p20-85) &den_public_trans =9.671-95.636 (p38-92)                      | rate_local12 =0.006-0.114 (p45-81) | 47.73 | 0.72 | 24.22 | 0.10 | 1.31E-05 |  |  |

|            |                                                                                                                  |                                    |       |      |       |      |          |  |
|------------|------------------------------------------------------------------------------------------------------------------|------------------------------------|-------|------|-------|------|----------|--|
|            | prop_over65 =0.134-0.212 (p29-89)                                                                                |                                    |       |      |       |      |          |  |
| <b>204</b> | &gender_ratio =87.597-100.434 (p11-83)<br>&den_population >16895.676 (p49)<br>build_area_pp <87.017 (p62)        | rate_local12 =0.005-0.110 (p45-81) | 45.88 | 0.74 | 24.16 | 0.11 | 8.24E-05 |  |
| <b>205</b> | &prop_open_recreation =0.014-0.146 (p34-89)<br>&POI_pp_edu <21.521 (p79)<br>gender_ratio =87.663-98.155 (p11-78) | rate_local12 =0.005-0.143 (p45-86) | 52.91 | 0.74 | 24.15 | 0.05 | 5.49E-05 |  |
| <b>206</b> | &prop_preprim_edu >0.080 (p19)<br>&prop_transport >0.068 (p36)                                                   | rate_local12 =0.005-0.103 (p45-79) | 51.63 | 0.63 | 24.14 | 0.06 | 3.27E-05 |  |
| <b>207</b> | gender_ratio =87.685-98.649 (p11-78)<br>&build_area_pp <88.479 (p62)<br>prop_over65 =0.139-0.216 (p34-91)        | rate_local12 =0.005-0.104 (p45-80) | 58.45 | 0.57 | 24.10 | 0.10 | 3.36E-05 |  |
| <b>208</b> | &prop_gov_insti_faci =0.025-0.148 (p36-92)<br>&POI_pp_sports <24.080 (p62)                                       | rate_local12 =0.007-0.127 (p45-83) | 44.54 | 0.81 | 23.87 | 0.11 | 4.75E-05 |  |
|            | prop_over65 =0.123-0.211 (p21-89)                                                                                |                                    |       |      |       |      |          |  |
| <b>209</b> | &prop_higher_edu <0.304 (p76)<br>&prop_open_recreation =0.014-0.146 (p34-89)                                     | rate_local12 =0.004-0.135 (p45-84) | 48.75 | 0.76 | 23.83 | 0.11 | 2.44E-05 |  |
| <b>210</b> | den_road >5.911 (p28) &build_area_pp <87.159 (p62)                                                               | rate_local12 =0.005-0.114 (p45-81) | 59.21 | 0.59 | 23.78 | 0.10 | 2.1E-06  |  |
| <b>211</b> | prop_publicResid >0.039 (p70) &POI_pp_sports <23.417 (p59)<br>gender_ratio =87.716-98.641 (p11-78)               | rate_local12 =0.005-0.110 (p45-81) | 44.17 | 0.75 | 23.68 | 0.09 | 3.68E-05 |  |
| <b>212</b> | &build_area_pp <119.974 (p76) &LU_entropy >0.550 (p49)<br>prop_business <0.069 (p87)                             | rate_local12 =0.006-0.105 (p45-80) | 47.28 | 0.67 | 23.52 | 0.09 | 3.08E-05 |  |
| <b>213</b> | &prop_open_recreation =0.022-0.138 (p41-87)<br>&POI_pp_edu <21.487 (p79)                                         | rate_local12 =0.005-0.114 (p45-81) | 48.59 | 0.68 | 23.44 | 0.07 | 4.07E-05 |  |
| <b>214</b> | gender_ratio =87.077-98.124 (p11-78)<br>&den_population >17229.025 (p50)                                         | rate_local12 =0.006-0.100 (p45-78) | 50.85 | 0.61 | 23.43 | 0.12 | 9.71E-07 |  |
| <b>215</b> | prop_publicResid >0.039 (p70) &POI_pp_edu <15.052 (p67)                                                          | rate_local12 =0.005-0.114 (p45-81) | 43.95 | 0.76 | 23.40 | 0.09 | 2.65E-05 |  |
| <b>216</b> | den_bldg =0.084-0.338 (p29-77)<br>&POI_pp_telecom_elec <14.644 (p58)                                             | rate_local12 =0.004-0.075 (p45-73) | 42.90 | 0.62 | 23.39 | 0.13 | 6.01E-05 |  |
| <b>217</b> | med_income <18399.947 (p61)<br>&den_public_trans =8.785-97.322 (p38-92)                                          | rate_local12 =0.005-0.125 (p45-82) | 51.82 | 0.68 | 23.30 | 0.14 | 2.23E-06 |  |



|     |                                                                                               |                                    |       |      |       |      |          |
|-----|-----------------------------------------------------------------------------------------------|------------------------------------|-------|------|-------|------|----------|
| 218 | prop_higher_edu <0.356 (p84)<br>&prop_gov_insti_faci =0.026-0.139 (p38-90)                    | rate_local12 =0.004-0.133 (p45-84) | 60.47 | 0.63 | 23.29 | 0.06 | 6.7E-05  |
| 219 | prop_higher_edu <0.307 (p76) &den_population<br>>15872.761 (p47)                              | rate_local12 =0.005-0.132 (p45-83) | 57.34 | 0.65 | 23.27 | 0.09 | 1.01E-05 |
| 220 | build_area_pp <85.719 (p60) &prop_transport<br>>0.074 (p36)                                   | rate_local12 =0.005-0.114 (p45-81) | 55.73 | 0.61 | 23.27 | 0.11 | 2.76E-05 |
| 221 | med_area_home <17.127 (p52) &den_bldg<br>=0.084-0.337 (p29-77) &POI_pp_edu <15.194<br>(p67)   | rate_local12 =0.005-0.073 (p45-73) | 38.00 | 0.72 | 23.26 | 0.11 | 2.99E-05 |
| 222 | prop_over65 =0.117-0.212 (p16-89)<br>&build_area_pp <88.565 (p62) &LU_entropy<br>>0.522 (p40) | rate_local12 =0.006-0.111 (p45-81) | 44.54 | 0.73 | 23.24 | 0.11 | 3.15E-05 |
| 223 | den_public_trans =7.631-93.088 (p36-92)<br>&prop_gov_insti_faci =0.015-0.131 (p30-89)         | rate_local12 =0.005-0.116 (p45-81) | 54.44 | 0.62 | 23.08 | 0.10 | 1.59E-05 |
| 224 | den_population >14660.093 (p46)<br>&build_area_pp <75.037 (p54)                               | rate_local12 =0.005-0.128 (p45-83) | 55.19 | 0.65 | 23.03 | 0.11 | 2.3E-05  |
| 225 | gender_ratio =87.593-98.655 (p11-78)<br>&prop_transport >0.076 (p36)                          | rate_local12 =0.005-0.104 (p45-80) | 55.95 | 0.57 | 22.99 | 0.11 | 2.43E-05 |
| 226 | den_bldg =0.082-0.432 (p28-83) &POI_pp_edu<br><17.921 (p71)                                   | rate_local12 =0.005-0.098 (p45-78) | 53.11 | 0.57 | 22.97 | 0.12 | 3.39E-05 |
| 227 | prop_higher_edu <0.315 (p78)<br>&prop_open_recreation =0.016-0.154 (p36-90)                   | rate_local12 =0.005-0.122 (p45-82) | 54.56 | 0.64 | 22.94 | 0.12 | 8.09E-06 |
| 228 | prop_preprim_edu =0.082-0.138 (p21-86)<br>&prop_open_recreation =0.013-0.147 (p33-89)         | rate_local12 =0.006-0.111 (p45-81) | 51.20 | 0.63 | 22.93 | 0.15 | 1.77E-05 |
| 229 | med_area_home <17.901 (p55) &LU_entropy<br>>0.558 (p50)                                       | rate_local12 =0.006-0.078 (p45-74) | 42.28 | 0.63 | 22.88 | 0.17 | 1.84E-05 |
| 230 | prop_higher_edu <0.304 (p76) &prop_business<br>=0.003-0.081 (p43-89)                          | rate_local12 =0.006-0.111 (p45-81) | 48.79 | 0.66 | 22.79 | 0.11 | 5.18E-06 |
| 231 | gender_ratio =87.355-100.048 (p11-83)<br>&den_road >6.022 (p29)                               | rate_local12 =0.005-0.106 (p45-80) | 61.61 | 0.54 | 22.74 | 0.09 | 8.41E-06 |
| 232 | LU_entropy >0.550 (p49) &POI_pp_telecom_elec<br><21.311 (p71)                                 | rate_local12 =0.005-0.095 (p45-77) | 51.65 | 0.57 | 22.71 | 0.11 | 5.7E-05  |
| 233 | med_area_home <16.093 (p47)                                                                   | rate_local12 =0.005-0.136 (p45-85) | 61.30 | 0.62 | 22.56 | 0.23 | 1.16E-12 |
| 234 | prop_over65 =0.134-0.212 (p29-89)<br>&den_population >16895.676 (p49)                         | rate_local12 =0.005-0.136 (p45-86) | 52.67 | 0.68 | 22.44 | 0.11 | 5.68E-06 |

|     |                                                                                                                 |                                    |       |      |       |      |          |
|-----|-----------------------------------------------------------------------------------------------------------------|------------------------------------|-------|------|-------|------|----------|
| 235 | med_income <18557.524 (p62)<br>&prop_open_recreation =0.016-0.154 (p36-90)                                      | rate_local12 =0.006-0.123 (p45-82) | 50.91 | 0.66 | 22.40 | 0.14 | 1.12E-05 |
| 236 | prop_over65 =0.117-0.212 (p16-89)<br>&prop_business <0.076 (p89)<br>&prop_open_recreation =0.022-0.142 (p40-88) | rate_local12 =0.005-0.108 (p45-81) | 43.80 | 0.70 | 22.33 | 0.09 | 2.25E-05 |
| 237 | LU_entropy >0.550 (p49) &POI_pp_sports<br><32.777 (p69)                                                         | rate_local12 =0.005-0.096 (p45-77) | 51.80 | 0.57 | 22.31 | 0.10 | 3.38E-05 |
| 238 | den_bldg =0.082-0.432 (p28-83)<br>&POI_pp_mall_mkt <10.489 (p74)                                                | rate_local12 =0.005-0.104 (p45-80) | 54.18 | 0.57 | 22.29 | 0.11 | 5E-05    |
| 239 | med_area_home <18.845 (p57) &den_road<br>=5.778-21.939 (p28-86)                                                 | rate_local12 =0.006-0.104 (p45-80) | 49.60 | 0.61 | 22.19 | 0.11 | 6.55E-05 |
| 240 | med_area_home <18.914 (p57) &den_bldg<br>=0.064-0.396 (p24-82)                                                  | rate_local12 =0.005-0.096 (p45-77) | 47.37 | 0.61 | 22.12 | 0.13 | 3.33E-05 |
| 241 | prop_preprim_edu =0.081-0.136 (p21-85)<br>&den_road =5.778-21.939 (p28-86)                                      | rate_local12 =0.006-0.098 (p45-78) | 49.60 | 0.59 | 22.03 | 0.13 | 7.38E-06 |
| 242 | build_area_pp <84.939 (p59) &LU_entropy<br>>0.547 (p47)                                                         | rate_local12 =0.006-0.099 (p45-78) | 44.72 | 0.64 | 22.03 | 0.17 | 3.83E-06 |
| 243 | med_income <18344.977 (p61) &prop_business<br>=0.003-0.052 (p43-86)                                             | rate_local12 =0.005-0.114 (p45-81) | 43.78 | 0.71 | 22.00 | 0.15 | 8.28E-06 |
| 244 | build_area_pp <90.950 (p62)<br>&prop_gov_insti_faci =0.009-0.141 (p21-91)                                       | rate_local12 =0.006-0.122 (p45-82) | 59.14 | 0.59 | 21.97 | 0.09 | 5.44E-05 |
| 245 | prop_over65 =0.117-0.212 (p16-89)<br>&den_public_trans =12.407-94.657 (p42-92)<br>&LU_entropy >0.503 (p34)      | rate_local12 =0.005-0.108 (p45-81) | 42.30 | 0.72 | 21.95 | 0.10 | 5.25E-05 |
| 246 | prop_over65 =0.117-0.212 (p16-89)<br>&gender_ratio =87.732-98.813 (p11-78)                                      | rate_local12 =0.005-0.108 (p45-81) | 59.78 | 0.54 | 21.90 | 0.08 | 8.1E-05  |
| 247 | den_bldg =0.084-0.337 (p29-77) &POI_pp_sports<br><23.905 (p60)                                                  | rate_local12 =0.004-0.068 (p45-73) | 40.73 | 0.57 | 21.79 | 0.13 | 5.72E-05 |
| 248 | den_public_trans =6.908-78.515 (p35-88)<br>&LU_entropy >0.549 (p48)                                             | rate_local12 =0.005-0.088 (p45-76) | 44.37 | 0.60 | 21.62 | 0.14 | 5.05E-06 |
| 249 | prop_gov_insti_faci =0.026-0.139 (p38-90)<br>&LU_entropy >0.548 (p48)                                           | rate_local12 =0.004-0.089 (p45-77) | 42.38 | 0.63 | 21.62 | 0.16 | 3.71E-06 |
| 250 | prop_over65 =0.133-0.179 (p28-68)<br>&build_area_pp <72.374 (p54)                                               | rate_local12 =0.004-0.130 (p45-83) | 39.72 | 0.83 | 21.52 | 0.28 | 1.45E-08 |

|     |                                                                                                              |                                    |       |      |       |      |          |
|-----|--------------------------------------------------------------------------------------------------------------|------------------------------------|-------|------|-------|------|----------|
| 251 | prop_gov_insti_faci =0.023-0.137 (p33-90)<br>&prop_open_recreation =0.019-0.140 (p37-88)                     | rate_local12 =0.005-0.098 (p45-78) | 46.03 | 0.61 | 21.52 | 0.12 | 2.09E-05 |
| 252 | med_income <18636.855 (p62) &den_population<br>>14660.093 (p46)                                              | rate_local12 =0.007-0.140 (p45-86) | 54.78 | 0.65 | 21.51 | 0.09 | 4.47E-05 |
| 253 | prop_over65 =0.120-0.183 (p19-72)<br>&prop_preprim_edu =0.081-0.138 (p20-86)                                 | rate_local12 =0.004-0.137 (p45-86) | 52.54 | 0.66 | 21.47 | 0.14 | 5.05E-07 |
| 254 | prop_publicResid >0.033 (p69)                                                                                | rate_local12 =0.005-0.112 (p45-81) | 46.27 | 0.65 | 21.37 | 0.30 | 8.82E-13 |
| 255 | prop_open_recreation =0.019-0.159 (p36-90)<br>&LU_entropy >0.547 (p47)                                       | rate_local12 =0.005-0.101 (p45-78) | 43.84 | 0.64 | 21.18 | 0.16 | 7.89E-05 |
| 256 | gender_ratio =87.716-98.641 (p11-78)<br>&LU_entropy >0.550 (p49)                                             | rate_local12 =0.004-0.096 (p45-77) | 48.52 | 0.57 | 21.06 | 0.10 | 6.48E-05 |
| 257 | prop_over65 =0.129-0.215 (p26-91)<br>&prop_business =0.003-0.041 (p42-85)<br>&POI_pp_edu <14.779 (p67)       | rate_local12 =0.005-0.125 (p45-82) | 38.25 | 0.83 | 20.97 | 0.14 | 1.71E-06 |
| 258 | den_population >16250.026 (p48) &LU_entropy<br>>0.555 (p50)                                                  | rate_local12 =0.005-0.094 (p45-77) | 39.90 | 0.67 | 20.94 | 0.20 | 3.66E-07 |
| 259 | prop_higher_edu <0.320 (p79) &prop_transport<br>>0.078 (p36)                                                 | rate_local12 =0.005-0.119 (p45-82) | 57.54 | 0.57 | 20.80 | 0.09 | 4.83E-05 |
| 260 | build_area_pp <95.672 (p65) &prop_utilities<br>>0.007 (p55) &POI_pp_edu <20.556 (p76)                        | rate_local12 =0.006-0.115 (p45-81) | 41.55 | 0.70 | 20.56 | 0.09 | 3.7E-05  |
| 261 | prop_higher_edu <0.323 (p79) &den_road >6.778<br>(p31)                                                       | rate_local12 =0.005-0.112 (p45-81) | 58.02 | 0.54 | 20.47 | 0.10 | 1E-05    |
| 262 | prop_over65 =0.118-0.211 (p17-89)<br>&prop_open_recreation =0.011-0.126 (p32-84)<br>&LU_entropy >0.549 (p48) | rate_local12 =0.005-0.121 (p45-82) | 37.03 | 0.82 | 20.38 | 0.15 | 5.11E-05 |
| 263 | prop_publicResid >0.061 (p74)<br>&POI_pp_telecom_elec <14.827 (p58)                                          | rate_local12 =0.006-0.123 (p45-82) | 38.98 | 0.77 | 20.33 | 0.07 | 4.94E-05 |
| 264 | prop_business <0.067 (p87)<br>&prop_open_recreation =0.020-0.144 (p38-89)                                    | rate_local12 =0.005-0.109 (p45-81) | 49.76 | 0.58 | 20.28 | 0.07 | 6.04E-05 |
| 265 | med_income <20959.885 (p73)<br>&prop_gov_insti_faci >0.025 (p36)                                             | rate_local12 =0.005-0.124 (p45-82) | 57.59 | 0.57 | 20.28 | 0.09 | 4.26E-05 |
| 266 | prop_gov_insti_faci =0.026-0.139 (p38-90)                                                                    | rate_local12 =0.004-0.133 (p45-84) | 63.77 | 0.57 | 20.16 | 0.18 | 1.39E-09 |
| 267 | prop_over65 =0.130-0.185 (p26-73)<br>&prop_open_recreation =0.019-0.159 (p36-90)                             | rate_local12 =0.006-0.142 (p45-86) | 43.41 | 0.74 | 20.00 | 0.19 | 3.09E-05 |

|     |                                                                                            |                                    |       |      |       |      |          |
|-----|--------------------------------------------------------------------------------------------|------------------------------------|-------|------|-------|------|----------|
| 268 | prop_transport >0.098 (p43) &LU_entropy >0.558 (p50)                                       | rate_local12 =0.005-0.103 (p45-79) | 41.04 | 0.65 | 19.99 | 0.17 | 9.82E-07 |
| 269 | prop_over65 =0.129-0.212 (p25-89) &prop_business =0.001-0.043 (p37-85)                     | rate_local12 =0.006-0.110 (p45-81) | 42.94 | 0.65 | 19.96 | 0.13 | 7.48E-05 |
| 270 | prop_publicResid >0.061 (p74) &POI_pp_mall_mkt <7.577 (p63)                                | rate_local12 =0.006-0.123 (p45-82) | 38.04 | 0.77 | 19.81 | 0.07 | 4.94E-05 |
| 271 | den_road >7.233 (p34) &LU_entropy >0.548 (p48)                                             | rate_local12 =0.006-0.100 (p45-78) | 45.20 | 0.58 | 19.71 | 0.11 | 2.45E-05 |
| 272 | prop_business =0.003-0.111 (p43-92) prop_over65 =0.123-0.210 (p21-89)                      | rate_local12 =0.006-0.108 (p45-81) | 55.62 | 0.53 | 19.67 | 0.19 | 5.52E-10 |
| 273 | &den_population >25589.345 (p58) &prop_business <0.052 (p86)                               | rate_local12 =0.005-0.108 (p45-81) | 36.90 | 0.74 | 19.65 | 0.12 | 1.85E-06 |
| 274 | den_population >15220.411 (p47)                                                            | rate_local12 =0.005-0.133 (p45-84) | 64.41 | 0.56 | 19.61 | 0.17 | 1.49E-10 |
| 275 | den_public_trans =4.501-90.772 (p29-91)                                                    | rate_local12 =0.006-0.181 (p45-90) | 77.15 | 0.59 | 19.38 | 0.15 | 2.96E-09 |
| 276 | build_area_pp <46.072 (p36)                                                                | rate_local12 =0.006-0.116 (p45-81) | 47.26 | 0.60 | 19.22 | 0.25 | 1.69E-09 |
| 277 | prop_over65 =0.129-0.215 (p26-91) &den_road >5.180 (p25) &prop_business <0.053 (p86)       | rate_local12 =0.006-0.115 (p45-81) | 48.50 | 0.59 | 19.02 | 0.07 | 4.59E-05 |
| 278 | med_income <19374.821 (p63) &den_road >6.778 (p31)                                         | rate_local12 =0.005-0.119 (p45-82) | 53.52 | 0.56 | 18.89 | 0.11 | 5.61E-05 |
| 279 | med_income <19067.492 (p63) &prop_transport >0.066 (p35) prop_over65 =0.129-0.192 (p26-78) | rate_local12 =0.006-0.133 (p45-84) | 55.24 | 0.59 | 18.86 | 0.10 | 5.69E-05 |
| 280 | &med_income <16507.205 (p51) &POI_pp_transport <80.520 (p83)                               | rate_local12 =0.006-0.142 (p45-86) | 39.70 | 0.75 | 18.59 | 0.08 | 5.38E-05 |
| 281 | gender_ratio =87.699-97.657 (p11-77)                                                       | rate_local12 =0.006-0.107 (p45-81) | 65.31 | 0.47 | 18.34 | 0.13 | 7.02E-09 |
| 282 | prop_preprim_edu =0.081-0.128 (p20-82)                                                     | rate_local12 =0.005-0.115 (p45-81) | 63.85 | 0.50 | 17.90 | 0.14 | 1.93E-08 |
| 283 | build_area_pp <89.111 (p62) &prop_utilities >0.007 (p55)                                   | rate_local12 =0.006-0.115 (p45-81) | 40.70 | 0.63 | 17.80 | 0.14 | 2.95E-05 |
| 284 | prop_open_recreation =0.020-0.120 (p38-82)                                                 | rate_local12 =0.005-0.132 (p45-83) | 54.10 | 0.57 | 17.78 | 0.19 | 3.09E-07 |
| 285 | den_bldg <0.427 (p83) &den_public_trans >27.922 (p60) &POI_pp_sports <30.677 (p68)         | rate_local12 =0.005-0.103 (p45-79) | 32.42 | 0.73 | 17.62 | 0.11 | 5.22E-05 |
| 286 | POI_pp_mall_mkt =1.108-4.008 (p11-46)                                                      | rate_local12 =0.005-0.103 (p45-79) | 41.24 | 0.58 | 17.55 | 0.25 | 9.66E-10 |
| 287 | den_road >7.576 (p36) &prop_business <0.058 (p86)                                          | rate_local12 =0.005-0.101 (p45-78) | 52.32 | 0.49 | 17.15 | 0.07 | 6.13E-05 |

|     |                                                                                                       |                                    |       |      |       |      |          |
|-----|-------------------------------------------------------------------------------------------------------|------------------------------------|-------|------|-------|------|----------|
| 288 | prop_grassland =0.005-0.037 (p29-58)<br>&POI_pp_edu <13.833 (p62)                                     | rate_local12 =0.005-0.106 (p45-80) | 31.55 | 0.74 | 17.02 | 0.22 | 6.64E-05 |
| 289 | den_road =6.923-22.238 (p33-86)<br>prop_over65 =0.141-0.188 (p36-76)                                  | rate_local12 =0.005-0.103 (p45-79) | 53.40 | 0.48 | 16.59 | 0.15 | 2.51E-06 |
| 290 | &med_income <16341.219 (p50)<br>&POI_pp_telecom_elec <27.683 (p78)                                    | rate_local12 =0.006-0.142 (p45-86) | 33.92 | 0.78 | 16.55 | 0.09 | 5.04E-05 |
| 291 | prop_grassland =0.005-0.037 (p29-58)<br>&POI_pp_telecom_elec <18.319 (p65)                            | rate_local12 =0.006-0.103 (p45-79) | 31.60 | 0.70 | 16.52 | 0.18 | 7.27E-05 |
| 292 | den_bldg <0.291 (p72) &prop_transport >0.106<br>(p44) &POI_pp_telecom_elec <17.011 (p61)              | rate_local12 =0.002-0.072 (p45-73) | 28.09 | 0.65 | 16.37 | 0.13 | 5.07E-05 |
| 293 | prop_grassland =0.005-0.037 (p29-58)<br>&POI_pp_mall_mkt <9.372 (p66)                                 | rate_local12 =0.005-0.103 (p45-79) | 31.66 | 0.69 | 16.28 | 0.17 | 7.98E-05 |
| 294 | prop_over65 =0.136-0.177 (p31-66)<br>&LU_entropy >0.568 (p53)                                         | rate_local12 =0.005-0.091 (p45-77) | 27.45 | 0.77 | 16.26 | 0.28 | 2E-06    |
| 295 | LU_entropy >0.543 (p46)                                                                               | rate_local12 =0.006-0.106 (p45-80) | 54.87 | 0.47 | 15.52 | 0.13 | 1.6E-06  |
| 296 | prop_transport =0.064-0.335 (p35-87)                                                                  | rate_local12 =0.005-0.086 (p45-76) | 50.68 | 0.43 | 15.40 | 0.13 | 3.04E-06 |
| 297 | prop_grassland =0.005-0.037 (p29-58)<br>&POI_pp_transport <58.495 (p77)                               | rate_local12 =0.005-0.103 (p45-79) | 31.96 | 0.64 | 15.33 | 0.13 | 6.27E-05 |
| 298 | prop_over65 =0.136-0.177 (p31-66)                                                                     | rate_local12 =0.005-0.144 (p45-86) | 45.49 | 0.60 | 14.92 | 0.20 | 1.47E-06 |
| 299 | prop_grassland =0.005-0.037 (p29-58)<br>&POI_pp_sports <42.413 (p79)                                  | rate_local12 =0.005-0.108 (p45-81) | 32.44 | 0.63 | 14.79 | 0.11 | 8.33E-05 |
| 300 | den_bldg <0.427 (p83) &den_public_trans<br>>27.922 (p60)                                              | rate_local12 =0.005-0.103 (p45-79) | 32.42 | 0.61 | 14.53 | 0.13 | 1.12E-05 |
| 301 | prop_over65 =0.141-0.188 (p36-76)<br>&med_income <16341.219 (p50)                                     | rate_local12 =0.006-0.142 (p45-86) | 34.41 | 0.69 | 14.41 | 0.14 | 5.91E-05 |
| 302 | prop_open_recreation =0.023-0.101 (p43-78)<br>&prop_transport =0.069-0.252 (p36-74)                   | rate_local12 =0.006-0.116 (p45-81) | 26.65 | 0.74 | 13.75 | 0.20 | 3.16E-05 |
| 303 | den_population >17626.686 (p50) &den_bldg<br>=0.077-0.277 (p26-70)                                    | rate_local12 =0.002-0.056 (p45-68) | 24.27 | 0.48 | 13.59 | 0.14 | 2.47E-05 |
| 304 | den_bldg =0.058-0.360 (p21-80)                                                                        | rate_local12 =0.006-0.070 (p45-73) | 46.71 | 0.38 | 13.40 | 0.11 | 3.74E-05 |
| 305 | den_bldg <0.291 (p72) &prop_transport >0.106<br>(p44)                                                 | rate_local12 =0.002-0.072 (p45-73) | 28.18 | 0.52 | 13.33 | 0.14 | 2.24E-05 |
| 306 | med_area_home <18.868 (p57) &prop_shrubland<br>=0.009-0.082 (p30-53) &POI_pp_mall_mkt<br><9.766 (p69) | rate_local12 =0.008-0.083 (p45-75) | 20.57 | 0.77 | 12.77 | 0.11 | 7.24E-05 |

|     |                                                                                                      |                                    |       |      |       |      |          |
|-----|------------------------------------------------------------------------------------------------------|------------------------------------|-------|------|-------|------|----------|
| 307 | med_area_home <18.153 (p55) &prop_shrubland =0.009-0.082 (p30-53) &POI_pp_telecom_elec <18.844 (p67) | rate_local12 =0.008-0.083 (p45-75) | 20.28 | 0.77 | 12.63 | 0.09 | 7.24E-05 |
| 308 | med_income <18518.024 (p62)                                                                          | rate_local12 =0.006-0.136 (p45-85) | 62.63 | 0.48 | 12.12 | 0.09 | 1.23E-05 |
| 309 | den_public_trans >28.630 (p61) &prop_shrubland =0.007-0.095 (p30-55)                                 | rate_local12 =0.007-0.101 (p45-78) | 20.20 | 0.79 | 11.83 | 0.30 | 2.46E-06 |
| 310 | prop_shrubland =0.001-0.085 (p21-53)                                                                 | rate_local12 =0.007-0.092 (p45-77) | 33.46 | 0.48 | 11.76 | 0.17 | 3.94E-05 |
| 311 | med_area_home <18.153 (p55) &prop_shrubland =0.009-0.082 (p30-53)                                    | rate_local12 =0.008-0.083 (p45-75) | 20.43 | 0.69 | 11.73 | 0.21 | 6.21E-05 |
| 312 | prop_grassland =0.005-0.037 (p29-58)                                                                 | rate_local12 =0.005-0.104 (p45-80) | 32.03 | 0.52 | 11.31 | 0.18 | 4.87E-05 |
| 313 | POI_pp_mall_mkt <1.108 (p11)                                                                         | rate_local12 =0.005-0.103 (p45-79) | 18.91 | 0.78 | 10.78 | 0.44 | 5.47E-07 |
| 314 | den_population >16895.676 (p49) &prop_private_resid =0.011-0.101 (p28-66)                            | rate_local12 =0.002-0.046 (p45-63) | 17.60 | 0.43 | 10.53 | 0.16 | 4.54E-05 |
| 315 | prop_over65 =0.161-0.180 (p51-69) &prop_gov_insti_faci >0.041 (p48)                                  | rate_local12 =0.005-0.103 (p45-79) | 15.33 | 0.73 | 8.36  | 0.23 | 7.63E-05 |
| 316 | prop_private_resid =0.011-0.101 (p28-66)                                                             | rate_local12 =0.002-0.046 (p45-63) | 21.97 | 0.28 | 8.18  | 0.10 | 5.72E-05 |
| 317 | prop_gov_insti_faci <0.026 (p38)                                                                     | rate_local12 <0.004 (p45)          | 55.42 | 0.71 | 19.81 | 0.25 | 9.29E-09 |
| 318 | den_population <15220.411 (p47)                                                                      | rate_local12 <0.005 (p45)          | 63.23 | 0.63 | 18.05 | 0.18 | 1.27E-08 |
| 319 | prop_open_recreation <0.020 (p38)                                                                    | rate_local12 <0.005 (p45)          | 55.16 | 0.67 | 17.87 | 0.22 | 9.89E-07 |
| 320 | den_public_trans <4.501 (p29)                                                                        | rate_local12 <0.006 (p45)          | 45.70 | 0.74 | 17.71 | 0.29 | 1.31E-07 |
| 321 | prop_private_resid <0.011 (p28)                                                                      | rate_local12 <0.002 (p45)          | 43.51 | 0.74 | 16.71 | 0.28 | 1.14E-07 |
| 322 | POI_pp_transport >75.207 (p82)                                                                       | rate_local12 <0.005 (p45)          | 33.22 | 0.84 | 15.33 | 0.39 | 5.03E-08 |
| 323 | prop_transport <0.064 (p35)                                                                          | rate_local12 <0.005 (p45)          | 47.96 | 0.66 | 14.99 | 0.21 | 8.09E-06 |
| 324 | POI_pp_telecom_elec >35.358 (p84)                                                                    | rate_local12 <0.005 (p45)          | 29.82 | 0.84 | 13.74 | 0.39 | 1.54E-07 |
| 325 | med_area_home >16.093 (p47)                                                                          | rate_local12 <0.005 (p45)          | 65.96 | 0.57 | 13.52 | 0.12 | 4.79E-05 |
| 326 | POI_pp_edu >29.153 (p86)                                                                             | rate_local12 <0.005 (p45)          | 28.49 | 0.86 | 13.42 | 0.40 | 4.37E-07 |
| 327 | prop_publicResid <0.033 (p69)                                                                        | rate_local12 <0.005 (p45)          | 78.99 | 0.55 | 13.39 | 0.09 | 7.54E-05 |
| 328 | den_road <6.923 (p33)                                                                                | rate_local12 <0.005 (p45)          | 44.85 | 0.64 | 13.04 | 0.19 | 5.58E-05 |
| 329 | POI_pp_mall_mkt >16.323 (p86)                                                                        | rate_local12 <0.005 (p45)          | 27.34 | 0.86 | 12.96 | 0.41 | 4.37E-07 |
| 330 | den_bldg <0.058 (p21)                                                                                | rate_local12 <0.006 (p45)          | 32.47 | 0.72 | 12.09 | 0.27 | 2.17E-05 |
| 331 | prop_over65 >0.180 (p69) &prop_gov_insti_faci <0.041 (p48)                                           | rate_local12 <0.005 (p45)          | 26.50 | 0.82 | 11.90 | 0.20 | 5.4E-05  |
| 332 | POI_pp_sports >68.635 (p87)                                                                          | rate_local12 <0.005 (p45)          | 23.83 | 0.87 | 11.46 | 0.42 | 8.56E-06 |
| 333 | prop_over65 >0.204 (p84)                                                                             | rate_local12 <0.005 (p45)          | 25.42 | 0.76 | 10.35 | 0.31 | 6.96E-05 |

**(b) Rules for wave-1 imported case rate; POI accessibility was used**

| No. | Antecedent                                                                                             | Consequent                   | Supp  | Conf | Lev   | Imp  | P        |
|-----|--------------------------------------------------------------------------------------------------------|------------------------------|-------|------|-------|------|----------|
| 1   | prop_higher_edu >0.212 (p54) & build_area_pp >63.378 (p51)                                             | rate_imported12 >0.100 (p68) | 44.81 | 0.70 | 23.96 | 0.13 | 5.09E-05 |
| 2   | prop_higher_edu >0.188 (p43) & med_area_home >16.738 (p50)                                             | rate_imported12 >0.107 (p70) | 47.59 | 0.61 | 23.03 | 0.12 | 7.23E-05 |
| 3   | med_income >19583.009 (p65)                                                                            | rate_imported12 >0.110 (p70) | 44.69 | 0.62 | 22.24 | 0.31 | 1.22E-15 |
| 4   | prop_higher_edu >0.171 (p39) & prop_industrial <0.010 (p71)                                            | rate_imported12 >0.087 (p67) | 59.44 | 0.57 | 22.04 | 0.08 | 1.61E-05 |
| 5   | prop_preprim_edu <0.134 (p84) & med_area_home >16.409 (p49)                                            | rate_imported12 >0.081 (p64) | 54.36 | 0.60 | 20.85 | 0.08 | 4.54E-05 |
| 6   | build_area_pp =68.225-212.874 (p52-90) & prop_industrial <0.014 (p76) & prop_agricultural <0.051 (p80) | rate_imported12 >0.106 (p70) | 33.99 | 0.76 | 19.82 | 0.10 | 2.36E-05 |
| 7   | med_area_home >17.118 (p52) & prop_agricultural <0.061 (p82)                                           | rate_imported12 >0.099 (p68) | 43.93 | 0.60 | 19.82 | 0.10 | 5.4E-05  |
| 8   | med_income >16353.521 (p50) & prop_industrial <0.000 (p43)                                             | rate_imported12 >0.100 (p68) | 38.30 | 0.67 | 19.55 | 0.19 | 8.01E-07 |
| 9   | build_area_pp =68.225-212.874 (p52-90) & prop_agricultural <0.063 (p82)                                | rate_imported12 >0.084 (p66) | 40.16 | 0.69 | 19.16 | 0.16 | 2.68E-07 |
| 10  | build_area_pp >63.378 (p51) & prop_industrial <0.002 (p55) & prop_grassland <0.086 (p71)               | rate_imported12 >0.100 (p68) | 33.34 | 0.75 | 18.77 | 0.12 | 3.02E-05 |
| 11  | prop_preprim_edu <0.134 (p84) & build_area_pp >73.363 (p54)                                            | rate_imported12 >0.108 (p70) | 42.93 | 0.55 | 18.72 | 0.10 | 7.07E-05 |
| 12  | med_area_home >17.900 (p55) & prop_grassland <0.073 (p69)                                              | rate_imported12 >0.100 (p68) | 36.50 | 0.67 | 18.61 | 0.16 | 4.18E-05 |
| 13  | prop_higher_edu >0.210 (p53) & POI_pp_mall_mkt >7.907 (p64)                                            | rate_imported12 >0.160 (p78) | 30.38 | 0.61 | 18.61 | 0.17 | 1.96E-05 |
| 14  | med_area_home >15.947 (p47) & prop_industrial <0.000 (p43)                                             | rate_imported12 >0.100 (p68) | 36.96 | 0.65 | 18.37 | 0.17 | 5.25E-05 |
| 15  | build_area_pp >68.114 (p52) & prop_industrial <0.000 (p43)                                             | rate_imported12 >0.116 (p71) | 32.26 | 0.68 | 18.19 | 0.24 | 3.51E-06 |
| 16  | prop_publicResid <0.005 (p56) & prop_industrial <0.009 (p70)                                           | rate_imported12 >0.116 (p71) | 44.50 | 0.50 | 18.04 | 0.10 | 5.08E-05 |
| 17  | build_area_pp >66.770 (p52) & prop_grassland <0.086 (p71)                                              | rate_imported12 >0.096 (p68) | 40.89 | 0.60 | 17.91 | 0.12 | 7.06E-05 |
| 18  | build_area_pp >71.028 (p53) & prop_rural_set <0.026 (p66)                                              | rate_imported12 >0.120 (p71) | 36.76 | 0.58 | 17.88 | 0.14 | 3.83E-05 |
| 19  | med_area_home >18.079 (p55) & prop_rural_set <0.022 (p64)                                              | rate_imported12 >0.161 (p78) | 29.75 | 0.57 | 17.57 | 0.17 | 6.12E-06 |
| 20  | prop_preprim_edu <0.097 (p52) & prop_publicResid <0.005 (p56)                                          | rate_imported12 >0.146 (p74) | 32.15 | 0.52 | 16.61 | 0.15 | 2.98E-05 |

|    |                                                                                          |                              |       |      |       |      |          |
|----|------------------------------------------------------------------------------------------|------------------------------|-------|------|-------|------|----------|
| 21 | prop_higher_edu >0.195 (p47) &POI_pp_edu >14.831 (p67)                                   | rate_imported12 >0.181 (p79) | 26.83 | 0.54 | 15.93 | 0.16 | 6.82E-05 |
| 22 | prop_higher_edu >0.364 (p85)                                                             | rate_imported12 >0.124 (p71) | 24.89 | 0.78 | 15.77 | 0.49 | 6.85E-11 |
| 23 | build_area_pp =51.859-202.851 (p43-89)                                                   | rate_imported12 >0.105 (p69) | 47.53 | 0.48 | 15.73 | 0.16 | 3.57E-07 |
| 24 | prop_industrial <0.008 (p70) &POI_pp_sports >28.416 (p66)                                | rate_imported12 >0.123 (p71) | 31.97 | 0.56 | 15.71 | 0.10 | 7.38E-05 |
| 25 | prop_higher_edu >0.237 (p62) &POI_pp_telecom_elec >21.730 (p71)                          | rate_imported12 >0.209 (p81) | 21.96 | 0.66 | 15.52 | 0.23 | 5.15E-05 |
| 26 | prop_publicResid <0.034 (p69)                                                            | rate_imported12 >0.103 (p69) | 62.20 | 0.43 | 15.37 | 0.11 | 1.72E-08 |
| 27 | prop_agricultural <0.057 (p82) &POI_pp_telecom_elec >24.175 (p75)                        | rate_imported12 >0.184 (p80) | 23.58 | 0.61 | 15.31 | 0.14 | 7.41E-05 |
| 28 | prop_industrial <0.000 (p39) &POI_pp_transport >35.681 (p57)                             | rate_imported12 >0.179 (p79) | 24.90 | 0.55 | 15.12 | 0.18 | 6.86E-05 |
| 29 | prop_industrial <0.000 (p39) &POI_pp_telecom_elec >18.233 (p65)                          | rate_imported12 >0.195 (p80) | 22.27 | 0.63 | 14.88 | 0.23 | 1.6E-05  |
| 30 | POI_pp_sports >30.523 (p67)                                                              | rate_imported12 >0.196 (p80) | 28.89 | 0.41 | 14.60 | 0.21 | 5.62E-08 |
| 31 | POI_pp_telecom_elec >25.431 (p76)                                                        | rate_imported12 >0.213 (p81) | 24.73 | 0.46 | 14.51 | 0.27 | 5.34E-10 |
| 32 | POI_pp_transport >39.200 (p61)                                                           | rate_imported12 >0.188 (p80) | 32.28 | 0.37 | 14.25 | 0.17 | 1.27E-07 |
| 33 | gender_ratio >94.412 (p59) &build_area_pp >60.156 (p50) &prop_agricultural <0.014 (p61)  | rate_imported12 >0.163 (p78) | 20.18 | 0.78 | 14.19 | 0.28 | 7.68E-05 |
| 34 | POI_pp_mall_mkt >10.941 (p75)                                                            | rate_imported12 >0.202 (p80) | 25.16 | 0.45 | 14.06 | 0.25 | 1.15E-08 |
| 35 | prop_industrial <0.000 (p43)                                                             | rate_imported12 >0.097 (p68) | 44.29 | 0.49 | 13.89 | 0.15 | 1.39E-06 |
| 36 | LU_entropy <0.561 (p51)                                                                  | rate_imported12 >0.099 (p68) | 48.70 | 0.45 | 12.73 | 0.12 | 5.05E-05 |
| 37 | med_area_home >25.388 (p86)                                                              | rate_imported12 >0.169 (p78) | 19.27 | 0.66 | 12.70 | 0.44 | 1.69E-12 |
| 38 | POI_pp_edu >22.306 (p79)                                                                 | rate_imported12 >0.187 (p80) | 22.41 | 0.48 | 12.67 | 0.27 | 2.78E-08 |
| 39 | ave_household_size >3.250 (p87)                                                          | rate_imported12 >0.110 (p70) | 20.27 | 0.76 | 11.98 | 0.45 | 6.18E-09 |
| 40 | prop_preprim_edu <0.078 (p17)                                                            | rate_imported12 >0.255 (p83) | 17.96 | 0.50 | 11.72 | 0.33 | 1.27E-08 |
| 41 | prop_over65 <0.140 (p35)                                                                 | rate_imported12 >0.083 (p65) | 38.57 | 0.53 | 11.66 | 0.16 | 5.07E-05 |
| 42 | build_area_pp =83.395-186.699 (p58-88) &LU_entropy <0.563 (p52)                          | rate_imported12 >0.084 (p66) | 23.07 | 0.72 | 11.48 | 0.16 | 4.34E-05 |
| 43 | den_population =673.564-26483.860 (p13-60)                                               | rate_imported12 >0.084 (p66) | 46.61 | 0.48 | 11.11 | 0.11 | 2.65E-05 |
| 44 | gender_ratio >95.715 (p69) &prop_rural_set <0.022 (p64)                                  | rate_imported12 >0.261 (p83) | 17.68 | 0.44 | 10.82 | 0.14 | 7.83E-05 |
| 45 | gender_ratio >94.644 (p62) &prop_industrial <0.000 (p36)                                 | rate_imported12 >0.203 (p80) | 16.53 | 0.56 | 10.73 | 0.22 | 1.06E-05 |
| 46 | gender_ratio >94.842 (p64)                                                               | rate_imported12 >0.207 (p81) | 26.22 | 0.32 | 10.36 | 0.13 | 6.6E-05  |
| 47 | prop_higher_edu =0.285-0.364 (p72-85)                                                    | rate_imported12 >0.124 (p71) | 16.06 | 0.59 | 8.36  | 0.31 | 5.13E-05 |
| 48 | gender_ratio >94.412 (p59) &den_population >20901.723 (p53) &build_area_pp >60.156 (p50) | rate_imported12 >0.189 (p80) | 9.88  | 0.83 | 7.39  | 0.41 | 6.01E-05 |



|    |                                                                                               |                                       |       |      |       |      |          |
|----|-----------------------------------------------------------------------------------------------|---------------------------------------|-------|------|-------|------|----------|
| 49 | build_area_pp >75.116 (p54) &prop_private_resid >0.239 (p85)                                  | rate_imported12 >0.184 (p80)          | 8.11  | 0.85 | 6.08  | 0.49 | 6.97E-05 |
| 50 | den_population <1544.010 (p22) &prop_private_resid =0.020-0.115 (p35-70)                      | rate_imported12 >0.188 (p80)          | 6.50  | 0.73 | 4.61  | 0.44 | 2.53E-05 |
| 51 | den_public_trans <5.489 (p32) &prop_agricultural <0.007 (p56)                                 | rate_imported12 >0.183 (p80)          | 5.97  | 0.70 | 4.16  | 0.44 | 3.06E-05 |
| 52 | den_bldg <0.055 (p20) &prop_private_resid =0.032-0.183 (p43-80)                               | rate_imported12 >0.297 (p84)          | 4.05  | 0.76 | 3.23  | 0.53 | 2.03E-05 |
| 53 | build_area_pp <68.225 (p52) &prop_agricultural >0.063 (p82)                                   | rate_imported12 >0.084 (p66)          | 5.36  | 0.67 | 2.46  | 0.40 | 7.77E-05 |
| 54 | prop_preprim_edu <0.131 (p83) &med_area_home <17.589 (p54) &POI_pp_transport <41.646 (p64)    | rate_imported12 =0.003-0.094 (p36-68) | 54.98 | 0.67 | 29.33 | 0.07 | 8.04E-05 |
| 55 | gender_ratio <96.234 (p71) &prop_preprim_edu <0.130 (p83) &med_area_home <18.749 (p57)        | rate_imported12 =0.004-0.112 (p36-71) | 60.03 | 0.67 | 29.30 | 0.07 | 2.04E-05 |
| 56 | prop_preprim_edu <0.131 (p83) &med_area_home <17.589 (p54) &POI_pp_edu <14.873 (p67)          | rate_imported12 =0.003-0.095 (p36-68) | 54.12 | 0.68 | 29.14 | 0.07 | 8.04E-05 |
| 57 | prop_preprim_edu <0.131 (p83) &med_area_home <17.589 (p54) &POI_pp_mall_mkt <9.149 (p66)      | rate_imported12 =0.005-0.096 (p36-68) | 54.64 | 0.68 | 29.10 | 0.07 | 2.96E-05 |
| 58 | prop_preprim_edu <0.131 (p83) &med_income <22172.304 (p77) &POI_pp_telecom_elec <15.807 (p59) | rate_imported12 =0.003-0.102 (p36-69) | 59.49 | 0.64 | 28.98 | 0.07 | 4.44E-05 |
| 59 | prop_preprim_edu <0.130 (p83) &med_income <20515.207 (p73) &POI_pp_transport <39.932 (p61)    | rate_imported12 =0.005-0.110 (p36-70) | 59.38 | 0.66 | 28.96 | 0.09 | 6.39E-05 |
| 60 | prop_preprim_edu <0.131 (p83) &med_area_home <17.589 (p54) &POI_pp_sports <25.282 (p62)       | rate_imported12 =0.005-0.096 (p36-68) | 54.29 | 0.68 | 28.95 | 0.07 | 2.96E-05 |
| 61 | prop_preprim_edu <0.132 (p83) &med_income <21672.073 (p75) &POI_pp_sports <22.607 (p57)       | rate_imported12 =0.003-0.101 (p36-68) | 57.69 | 0.64 | 28.61 | 0.08 | 5.21E-06 |
| 62 | prop_preprim_edu <0.131 (p83) &POI_pp_transport <34.984 (p57)                                 | rate_imported12 =0.005-0.156 (p36-76) | 71.50 | 0.66 | 28.25 | 0.06 | 4.66E-06 |
| 63 | gender_ratio <96.234 (p71) &prop_preprim_edu <0.130 (p83) &POI_pp_transport <30.187 (p52)     | rate_imported12 =0.005-0.110 (p36-70) | 55.65 | 0.69 | 28.25 | 0.05 | 7.59E-05 |
| 64 | prop_preprim_edu <0.130 (p83) &prop_higher_edu <0.274 (p69) &POI_pp_transport <39.932 (p61)   | rate_imported12 =0.004-0.101 (p36-68) | 55.07 | 0.65 | 27.50 | 0.10 | 3.03E-05 |
| 65 | gender_ratio <94.774 (p63) &med_income <20632.679 (p73) &POI_pp_telecom_elec <12.856 (p53)    | rate_imported12 =0.002-0.093 (p36-68) | 47.41 | 0.74 | 27.42 | 0.08 | 2.58E-05 |
| 66 | med_area_home <17.092 (p52) &POI_pp_telecom_elec <11.488 (p50)                                | rate_imported12 =0.004-0.090 (p36-67) | 51.47 | 0.66 | 27.41 | 0.14 | 8.79E-07 |

|    |                                                                                                          |                                       |       |      |       |      |          |
|----|----------------------------------------------------------------------------------------------------------|---------------------------------------|-------|------|-------|------|----------|
| 67 | prop_preprim_edu <0.130 (p83) &med_income <19760.524 (p65) &POI_pp_mall_mkt <7.462 (p61)                 | rate_imported12 =0.005-0.100 (p36-68) | 53.68 | 0.66 | 27.32 | 0.11 | 1.36E-05 |
| 68 | prop_preprim_edu <0.131 (p83) &POI_pp_sports <22.607 (p57)                                               | rate_imported12 =0.004-0.126 (p36-72) | 66.48 | 0.61 | 27.09 | 0.06 | 3.04E-05 |
| 69 | med_area_home <16.841 (p50) &POI_pp_transport <25.580 (p49)                                              | rate_imported12 =0.002-0.082 (p36-65) | 48.52 | 0.65 | 26.99 | 0.14 | 5.72E-06 |
| 70 | med_area_home <16.854 (p50) &POI_pp_edu <13.203 (p60)                                                    | rate_imported12 =0.002-0.088 (p36-67) | 51.63 | 0.64 | 26.96 | 0.12 | 4.57E-06 |
| 71 | med_area_home <17.246 (p52) &prop_private_resid =0.010-0.221 (p27-85) &POI_pp_transport <32.004 (p53)    | rate_imported12 =0.004-0.070 (p36-64) | 41.99 | 0.72 | 26.94 | 0.14 | 5.42E-06 |
| 72 | prop_preprim_edu <0.135 (p84) &med_income <20810.585 (p73) &build_area_pp <71.444 (p53)                  | rate_imported12 =0.003-0.112 (p36-71) | 55.37 | 0.66 | 26.92 | 0.08 | 8.55E-06 |
| 73 | gender_ratio <95.704 (p69) &prop_preprim_edu <0.130 (p83) &med_income <20318.595 (p73)                   | rate_imported12 =0.004-0.091 (p36-67) | 54.44 | 0.61 | 26.91 | 0.10 | 1.34E-05 |
| 74 | med_area_home <17.197 (p52) &prop_private_resid =0.010-0.221 (p27-85) &POI_pp_telecom_elec <10.658 (p49) | rate_imported12 =0.004-0.085 (p36-66) | 43.24 | 0.79 | 26.90 | 0.13 | 1.14E-05 |
| 75 | gender_ratio <94.103 (p58) &med_area_home <17.589 (p54) &POI_pp_mall_mkt <7.405 (p61)                    | rate_imported12 =0.004-0.098 (p36-68) | 46.39 | 0.76 | 26.86 | 0.11 | 4.17E-05 |
| 76 | prop_preprim_edu <0.130 (p82) &prop_higher_edu <0.241 (p63) &POI_pp_edu <10.562 (p52)                    | rate_imported12 =0.004-0.107 (p36-70) | 49.44 | 0.73 | 26.79 | 0.12 | 1.08E-05 |
| 77 | med_income <20533.112 (p73) &prop_agricultural <0.055 (p81) &POI_pp_transport <39.835 (p61)              | rate_imported12 =0.004-0.083 (p36-65) | 52.78 | 0.59 | 26.72 | 0.08 | 1.32E-05 |
| 78 | prop_preprim_edu <0.130 (p83) &POI_pp_telecom_elec <18.220 (p65)                                         | rate_imported12 =0.005-0.156 (p36-76) | 75.58 | 0.62 | 26.67 | 0.05 | 6.75E-05 |
| 79 | prop_preprim_edu <0.130 (p83) &POI_pp_mall_mkt <6.671 (p57)                                              | rate_imported12 =0.005-0.156 (p36-76) | 68.42 | 0.65 | 26.55 | 0.09 | 2.52E-07 |
| 80 | med_income <20922.721 (p73) &prop_private_resid =0.010-0.230 (p27-85) &POI_pp_telecom_elec <16.754 (p61) | rate_imported12 =0.003-0.081 (p36-64) | 46.47 | 0.67 | 26.53 | 0.11 | 7.92E-06 |
| 81 | med_area_home <17.343 (p52) &prop_private_resid =0.009-0.218 (p26-84) &POI_pp_sports <24.226 (p62)       | rate_imported12 =0.002-0.076 (p36-64) | 43.21 | 0.71 | 26.45 | 0.12 | 4.13E-06 |
| 82 | med_income <19986.043 (p65) &prop_private_resid =0.009-0.218 (p26-84) &POI_pp_transport <31.422 (p53)    | rate_imported12 =0.004-0.085 (p36-66) | 44.16 | 0.74 | 26.44 | 0.13 | 1.59E-06 |
| 83 | med_area_home <16.888 (p50) &POI_pp_mall_mkt <4.472 (p48)                                                | rate_imported12 =0.004-0.080 (p36-64) | 46.75 | 0.66 | 26.43 | 0.16 | 1.37E-06 |
| 84 | gender_ratio <96.234 (p71) &prop_preprim_edu <0.130 (p83) &prop_higher_edu <0.286 (p73)                  | rate_imported12 =0.003-0.096 (p36-68) | 55.89 | 0.60 | 26.31 | 0.09 | 2.98E-05 |

|            |                                                                                                              |                                       |       |      |       |      |          |
|------------|--------------------------------------------------------------------------------------------------------------|---------------------------------------|-------|------|-------|------|----------|
| <b>85</b>  | med_area_home <17.493 (p52) & build_area_pp <62.960 (p50)                                                    | rate_imported12 =0.004-0.080 (p36-64) | 49.97 | 0.60 | 26.28 | 0.11 | 5.15E-05 |
| <b>86</b>  | gender_ratio <93.540 (p51) & POI_pp_telecom_elec <13.409 (p54)                                               | rate_imported12 =0.005-0.120 (p36-71) | 49.54 | 0.75 | 26.28 | 0.19 | 3.1E-07  |
| <b>87</b>  | gender_ratio <93.909 (p56) & med_area_home <19.469 (p61)<br>& POI_pp_telecom_elec <20.088 (p68)              | rate_imported12 =0.004-0.142 (p36-74) | 54.36 | 0.74 | 26.21 | 0.07 | 7.8E-05  |
| <b>88</b>  | med_area_home <17.092 (p52) & prop_private_resid =0.009-0.218<br>(p26-84) & POI_pp_mall_mkt <5.960 (p53)     | rate_imported12 =0.004-0.075 (p36-64) | 41.59 | 0.74 | 26.20 | 0.13 | 1.82E-05 |
| <b>89</b>  | med_area_home <16.816 (p50) & den_public_trans =4.903-80.627<br>(p31-89)                                     | rate_imported12 =0.003-0.101 (p36-68) | 51.61 | 0.66 | 26.18 | 0.12 | 4.57E-06 |
| <b>90</b>  | med_area_home <17.343 (p52) & prop_private_resid =0.009-0.218<br>(p26-84) & POI_pp_edu <12.314 (p57)         | rate_imported12 =0.002-0.076 (p36-64) | 42.39 | 0.72 | 26.17 | 0.13 | 2.65E-05 |
| <b>91</b>  | gender_ratio <93.712 (p53) & med_area_home <17.235 (p52)<br>& POI_pp_transport <29.530 (p52)                 | rate_imported12 =0.002-0.097 (p36-68) | 43.28 | 0.80 | 26.12 | 0.10 | 7.25E-07 |
| <b>92</b>  | build_area_pp <99.164 (p67) & prop_private_resid =0.006-0.245<br>(p23-86) & POI_pp_transport <24.809 (p49)   | rate_imported12 =0.004-0.070 (p36-64) | 42.50 | 0.67 | 26.04 | 0.08 | 5.56E-05 |
| <b>93</b>  | gender_ratio <96.234 (p71) & prop_preprim_edu <0.130 (p83)<br>& POI_pp_mall_mkt <8.979 (p66)                 | rate_imported12 =0.003-0.082 (p36-65) | 53.47 | 0.56 | 25.92 | 0.06 | 4.53E-05 |
| <b>94</b>  | med_income <19986.043 (p65) & prop_private_resid =0.009-0.218<br>(p26-84) & POI_pp_sports <17.590 (p50)      | rate_imported12 =0.004-0.085 (p36-66) | 42.83 | 0.75 | 25.85 | 0.12 | 3.1E-06  |
| <b>95</b>  | gender_ratio <93.573 (p52) & med_area_home <17.791 (p55)<br>& POI_pp_edu <14.768 (p67)                       | rate_imported12 =0.003-0.097 (p36-68) | 44.62 | 0.76 | 25.84 | 0.11 | 6.41E-06 |
| <b>96</b>  | gender_ratio <93.626 (p52) & POI_pp_transport <32.487 (p54)                                                  | rate_imported12 =0.004-0.107 (p36-70) | 48.37 | 0.72 | 25.83 | 0.18 | 2.49E-07 |
| <b>97</b>  | gender_ratio <96.322 (p71) & prop_private_resid =0.010-0.230<br>(p27-85) & POI_pp_telecom_elec <13.444 (p55) | rate_imported12 =0.003-0.081 (p36-64) | 45.74 | 0.66 | 25.80 | 0.07 | 3.29E-05 |
| <b>98</b>  | prop_preprim_edu <0.130 (p83) & prop_higher_edu <0.246 (p64)<br>& prop_private_resid =0.010-0.230 (p27-85)   | rate_imported12 =0.004-0.097 (p36-68) | 45.90 | 0.73 | 25.77 | 0.11 | 1.25E-06 |
| <b>99</b>  | prop_preprim_edu <0.130 (p82) & POI_pp_edu <10.562 (p52)                                                     | rate_imported12 =0.004-0.120 (p36-71) | 59.52 | 0.62 | 25.67 | 0.08 | 2.88E-05 |
| <b>100</b> | prop_private_resid =0.010-0.221 (p27-85) & POI_pp_transport<br><18.338 (p40)                                 | rate_imported12 =0.004-0.070 (p36-64) | 41.24 | 0.69 | 25.66 | 0.14 | 1.2E-05  |
| <b>101</b> | gender_ratio <93.712 (p53) & POI_pp_sports <19.192 (p52)                                                     | rate_imported12 =0.005-0.115 (p36-71) | 47.99 | 0.74 | 25.64 | 0.20 | 2.95E-07 |
| <b>102</b> | gender_ratio <93.712 (p53) & med_area_home <18.234 (p55)                                                     | rate_imported12 =0.005-0.115 (p36-71) | 52.81 | 0.67 | 25.63 | 0.14 | 4.07E-06 |
| <b>103</b> | prop_private_resid =0.009-0.201 (p26-83) & POI_pp_telecom_elec<br><6.513 (p36)                               | rate_imported12 =0.005-0.064 (p36-60) | 38.46 | 0.70 | 25.53 | 0.14 | 1.25E-05 |

|     |                                                                                                           |                                       |       |      |       |      |          |
|-----|-----------------------------------------------------------------------------------------------------------|---------------------------------------|-------|------|-------|------|----------|
| 104 | prop_preprim_edu <0.129 (p82) &prop_higher_edu <0.235 (p62) &prop_agricultural <0.046 (p79)               | rate_imported12 =0.003-0.081 (p36-64) | 47.55 | 0.62 | 25.51 | 0.10 | 5.4E-06  |
| 105 | prop_preprim_edu <0.131 (p83) &med_area_home <17.718 (p54) &den_road =6.383-22.034 (p30-86)               | rate_imported12 =0.004-0.085 (p36-66) | 45.03 | 0.68 | 25.51 | 0.08 | 2.7E-05  |
| 106 | prop_preprim_edu <0.135 (p84) &med_area_home <16.645 (p50) &LU_entropy >0.561 (p52)                       | rate_imported12 =0.003-0.087 (p36-67) | 41.59 | 0.77 | 25.46 | 0.11 | 1.01E-06 |
| 107 | med_income <20795.645 (p73) &prop_transport =0.069-0.334 (p36-87) &POI_pp_sports <12.803 (p42)            | rate_imported12 =0.004-0.085 (p36-66) | 40.83 | 0.79 | 25.44 | 0.10 | 1.54E-05 |
| 108 | build_area_pp <65.661 (p52) &POI_pp_transport <24.748 (p49)                                               | rate_imported12 =0.003-0.075 (p36-64) | 46.35 | 0.60 | 25.40 | 0.12 | 1.66E-05 |
| 109 | prop_higher_edu <0.246 (p64) &prop_private_resid =0.010-0.230 (p27-85) &POI_pp_telecom_elec <13.632 (p55) | rate_imported12 =0.004-0.087 (p36-67) | 42.45 | 0.74 | 25.31 | 0.14 | 2.59E-06 |
| 110 | med_area_home <17.016 (p52) &prop_transport =0.051-0.322 (p31-86) &POI_pp_transport <30.472 (p53)         | rate_imported12 =0.004-0.089 (p36-67) | 42.69 | 0.75 | 25.28 | 0.11 | 6.48E-05 |
| 111 | prop_preprim_edu <0.130 (p83) &med_income <18949.418 (p62) &den_road =5.239-22.537 (p25-87)               | rate_imported12 =0.003-0.109 (p36-70) | 48.66 | 0.70 | 25.27 | 0.11 | 1.46E-06 |
| 112 | build_area_pp <65.774 (p52) &POI_pp_telecom_elec <12.662 (p51)                                            | rate_imported12 =0.003-0.077 (p36-64) | 47.74 | 0.59 | 25.26 | 0.12 | 2.5E-05  |
| 113 | prop_preprim_edu <0.130 (p83) &med_income <21622.419 (p75) &prop_private_resid =0.010-0.230 (p27-85)      | rate_imported12 =0.004-0.097 (p36-68) | 49.57 | 0.65 | 25.24 | 0.08 | 7.47E-06 |
| 114 | med_income <19998.727 (p65) &prop_transport =0.069-0.334 (p36-87) &POI_pp_telecom_elec <12.856 (p53)      | rate_imported12 =0.003-0.085 (p36-66) | 42.13 | 0.74 | 25.23 | 0.13 | 1.67E-05 |
| 115 | POI_pp_telecom_elec <6.513 (p36)                                                                          | rate_imported12 =0.004-0.091 (p36-67) | 48.88 | 0.64 | 25.23 | 0.33 | 1.78E-15 |
| 116 | med_income <19957.502 (p65) &POI_pp_telecom_elec <12.854 (p53)                                            | rate_imported12 =0.003-0.091 (p36-67) | 51.98 | 0.60 | 25.17 | 0.09 | 2.9E-05  |
| 117 | prop_private_resid =0.010-0.223 (p27-85) &POI_pp_sports <23.556 (p59)                                     | rate_imported12 =0.004-0.190 (p36-80) | 60.84 | 0.73 | 25.14 | 0.13 | 8.23E-07 |
| 118 | prop_higher_edu <0.281 (p71) &prop_private_resid =0.010-0.230 (p27-85) &POI_pp_transport <37.598 (p60)    | rate_imported12 =0.004-0.086 (p36-66) | 44.53 | 0.68 | 25.06 | 0.10 | 3.83E-05 |
| 119 | med_income <20342.840 (p73) &prop_agricultural <0.062 (p82) &POI_pp_sports <26.196 (p64)                  | rate_imported12 =0.005-0.083 (p36-65) | 51.16 | 0.57 | 25.03 | 0.06 | 7.81E-05 |
| 120 | build_area_pp <63.908 (p51) &POI_pp_sports <16.066 (p50)                                                  | rate_imported12 =0.003-0.080 (p36-64) | 47.25 | 0.61 | 24.95 | 0.11 | 6.38E-05 |
| 121 | med_area_home <17.525 (p53) &prop_transport =0.069-0.321 (p36-86) &POI_pp_telecom_elec <12.071 (p51)      | rate_imported12 =0.002-0.087 (p36-67) | 41.29 | 0.76 | 24.89 | 0.12 | 4.19E-05 |
| 122 | gender_ratio <94.071 (p58) &POI_pp_mall_mkt <5.378 (p51)                                                  | rate_imported12 =0.004-0.108 (p36-70) | 47.16 | 0.71 | 24.89 | 0.18 | 1.11E-06 |

|            |                                                                                                     |                                       |       |      |       |      |          |
|------------|-----------------------------------------------------------------------------------------------------|---------------------------------------|-------|------|-------|------|----------|
| <b>123</b> | med_income <19690.189 (p65) &prop_agricultural <0.060 (p82) &POI_pp_telecom_elec <19.914 (p68)      | rate_imported12 =0.002-0.083 (p36-65) | 50.90 | 0.57 | 24.84 | 0.06 | 4.41E-05 |
| <b>124</b> | prop_preprim_edu =0.080-0.138 (p19-85) &med_area_home <17.676 (p54) &den_bldg =0.084-0.424 (p29-83) | rate_imported12 =0.003-0.079 (p36-64) | 42.16 | 0.69 | 24.82 | 0.08 | 7.03E-05 |
| <b>125</b> | med_income <19957.502 (p65) &POI_pp_transport <31.324 (p53)                                         | rate_imported12 =0.004-0.093 (p36-68) | 52.76 | 0.59 | 24.79 | 0.08 | 2.71E-05 |
| <b>126</b> | prop_preprim_edu <0.130 (p82) &prop_higher_edu <0.228 (p61) &POI_pp_mall_mkt <6.188 (p55)           | rate_imported12 =0.003-0.101 (p36-68) | 46.65 | 0.69 | 24.78 | 0.12 | 2.05E-05 |
| <b>127</b> | prop_private_resid =0.010-0.221 (p27-85) &POI_pp_edu <6.845 (p43)                                   | rate_imported12 =0.004-0.067 (p36-62) | 40.33 | 0.64 | 24.77 | 0.16 | 1.52E-06 |
| <b>128</b> | med_income <19986.043 (p65) &prop_transport =0.065-0.333 (p35-87) &POI_pp_transport <32.480 (p54)   | rate_imported12 =0.004-0.082 (p36-65) | 41.95 | 0.71 | 24.77 | 0.12 | 5.04E-06 |
| <b>129</b> | med_income <19957.502 (p65) &POI_pp_sports <23.572 (p59)                                            | rate_imported12 =0.003-0.091 (p36-67) | 55.05 | 0.56 | 24.77 | 0.09 | 4.27E-05 |
| <b>130</b> | med_area_home <17.118 (p52) &prop_transport =0.079-0.345 (p36-90) &POI_pp_mall_mkt <4.472 (p48)     | rate_imported12 =0.004-0.080 (p36-64) | 38.79 | 0.78 | 24.68 | 0.14 | 3.09E-05 |
| <b>131</b> | prop_private_resid =0.010-0.230 (p27-85) &POI_pp_mall_mkt <3.690 (p44)                              | rate_imported12 =0.004-0.068 (p36-62) | 40.96 | 0.63 | 24.64 | 0.15 | 2.74E-06 |
| <b>132</b> | prop_higher_edu <0.246 (p64) &prop_private_resid =0.010-0.230 (p27-85) &POI_pp_sports <18.216 (p51) | rate_imported12 =0.004-0.087 (p36-67) | 41.29 | 0.74 | 24.60 | 0.12 | 2.81E-05 |
| <b>133</b> | med_area_home <17.246 (p52) &prop_private_resid =0.010-0.221 (p27-85)                               | rate_imported12 =0.004-0.070 (p36-64) | 44.13 | 0.59 | 24.60 | 0.13 | 2E-05    |
| <b>134</b> | build_area_pp <65.661 (p52) &POI_pp_mall_mkt <3.751 (p44)                                           | rate_imported12 =0.003-0.075 (p36-64) | 44.19 | 0.61 | 24.46 | 0.11 | 6E-05    |
| <b>135</b> | med_income <19761.738 (p65) &den_bldg =0.087-0.428 (p29-83) &POI_pp_telecom_elec <13.012 (p54)      | rate_imported12 =0.002-0.081 (p36-64) | 41.43 | 0.70 | 24.45 | 0.12 | 2.4E-05  |
| <b>136</b> | den_public_trans =2.846-78.606 (p21-88) &build_area_pp <62.576 (p50)                                | rate_imported12 =0.005-0.083 (p36-66) | 48.09 | 0.59 | 24.41 | 0.10 | 6.39E-05 |
| <b>137</b> | gender_ratio <93.712 (p53) &prop_higher_edu <0.326 (p79) &POI_pp_transport <53.890 (p73)            | rate_imported12 =0.001-0.097 (p36-68) | 49.45 | 0.63 | 24.41 | 0.06 | 7.72E-05 |
| <b>138</b> | med_income <20342.840 (p73) &prop_agricultural <0.062 (p82) &POI_pp_mall_mkt <7.342 (p60)           | rate_imported12 =0.005-0.083 (p36-65) | 49.46 | 0.58 | 24.41 | 0.08 | 6.2E-05  |
| <b>139</b> | prop_higher_edu <0.249 (p64) &POI_pp_sports <8.775 (p32)                                            | rate_imported12 =0.004-0.070 (p36-63) | 38.34 | 0.71 | 24.37 | 0.11 | 5.15E-05 |
| <b>140</b> | gender_ratio <93.626 (p52) &POI_pp_edu <10.116 (p50)                                                | rate_imported12 =0.004-0.096 (p36-68) | 44.18 | 0.71 | 24.36 | 0.20 | 2.32E-07 |
| <b>141</b> | prop_gov_insti_faci >0.027 (p38) &POI_pp_transport <41.966 (p64)                                    | rate_imported12 =0.004-0.154 (p36-75) | 63.26 | 0.64 | 24.30 | 0.09 | 1.15E-05 |

|     |                                                                                                              |                                       |       |      |       |      |          |
|-----|--------------------------------------------------------------------------------------------------------------|---------------------------------------|-------|------|-------|------|----------|
| 142 | prop_higher_edu <0.235 (p62) &prop_agricultural <0.046 (p79) &POI_pp_edu <15.157 (p67)                       | rate_imported12 =0.003-0.081 (p36-64) | 45.45 | 0.62 | 24.24 | 0.11 | 5.46E-05 |
| 143 | gender_ratio <95.000 (p64) &prop_gov_insti_faci >0.027 (p38) &POI_pp_mall_mkt <5.985 (p54)                   | rate_imported12 =0.004-0.123 (p36-71) | 45.76 | 0.76 | 24.14 | 0.09 | 7.66E-05 |
| 144 | prop_preprim_edu <0.126 (p81) &prop_higher_edu <0.237 (p62)                                                  | rate_imported12 =0.004-0.113 (p36-71) | 56.25 | 0.60 | 24.14 | 0.16 | 3.72E-09 |
| 145 | prop_preprim_edu <0.127 (p82) &med_income <18880.029 (p62)                                                   | rate_imported12 =0.003-0.111 (p36-71) | 58.42 | 0.58 | 24.13 | 0.12 | 4.93E-07 |
| 146 | prop_gov_insti_faci >0.027 (p38) &POI_pp_mall_mkt <9.043 (p66)                                               | rate_imported12 =0.004-0.137 (p36-74) | 60.60 | 0.62 | 24.12 | 0.12 | 5.29E-07 |
| 147 | prop_higher_edu <0.246 (p64) &prop_agricultural <0.059 (p82) &POI_pp_telecom_elec <21.917 (p71)              | rate_imported12 =0.004-0.082 (p36-65) | 48.82 | 0.57 | 24.11 | 0.08 | 3.85E-05 |
| 148 | prop_preprim_edu =0.080-0.138 (p19-85) &med_income <19052.086 (p63) &den_bldg =0.084-0.424 (p29-83)          | rate_imported12 =0.003-0.116 (p36-71) | 46.01 | 0.72 | 24.02 | 0.12 | 8.18E-05 |
| 149 | prop_gov_insti_faci >0.027 (p38) &POI_pp_sports <27.608 (p65)                                                | rate_imported12 =0.004-0.154 (p36-75) | 62.60 | 0.64 | 23.99 | 0.10 | 3.79E-06 |
| 150 | med_income <20560.672 (p73) &den_road >6.709 (p31) &POI_pp_sports <25.223 (p62)                              | rate_imported12 =0.004-0.076 (p36-64) | 46.01 | 0.58 | 23.98 | 0.09 | 7.6E-05  |
| 151 | prop_preprim_edu =0.079-0.135 (p18-84) &den_public_trans =6.497-83.636 (p34-91)                              | rate_imported12 =0.004-0.111 (p36-71) | 53.88 | 0.61 | 23.95 | 0.11 | 1.32E-06 |
| 152 | gender_ratio <93.624 (p52) &med_income <20108.868 (p73) &POI_pp_mall_mkt <5.988 (p54)                        | rate_imported12 =0.003-0.093 (p36-68) | 40.84 | 0.75 | 23.95 | 0.08 | 2.75E-05 |
| 153 | prop_gov_insti_faci >0.026 (p38) &POI_pp_edu <14.553 (p67)                                                   | rate_imported12 =0.003-0.139 (p36-74) | 61.01 | 0.62 | 23.94 | 0.10 | 2.31E-06 |
| 154 | den_population >15857.093 (p47) &prop_private_resid =0.009-0.201 (p26-83) &POI_pp_telecom_elec <12.219 (p51) | rate_imported12 =0.004-0.067 (p36-62) | 36.62 | 0.71 | 23.92 | 0.14 | 5.21E-05 |
| 155 | med_income <20846.023 (p73) &prop_private_resid =0.012-0.231 (p30-85) &POI_pp_mall_mkt <8.026 (p64)          | rate_imported12 =0.005-0.078 (p36-64) | 41.45 | 0.66 | 23.90 | 0.11 | 4.68E-05 |
| 156 | build_area_pp <68.225 (p52) &POI_pp_edu <9.956 (p50)                                                         | rate_imported12 =0.004-0.083 (p36-65) | 46.68 | 0.60 | 23.85 | 0.12 | 2.95E-05 |
| 157 | med_income <18984.449 (p62) &den_public_trans =6.952-79.515 (p35-89)                                         | rate_imported12 =0.004-0.090 (p36-67) | 46.61 | 0.63 | 23.83 | 0.17 | 4.67E-08 |
| 158 | prop_preprim_edu <0.130 (p83) &prop_higher_edu <0.246 (p64) &prop_business =0.001-0.047 (p33-86)             | rate_imported12 =0.004-0.097 (p36-68) | 44.68 | 0.68 | 23.83 | 0.07 | 6.34E-05 |
| 159 | med_area_home <17.016 (p52) &prop_transport =0.051-0.322 (p31-86)                                            | rate_imported12 =0.004-0.089 (p36-67) | 46.21 | 0.63 | 23.81 | 0.11 | 7.91E-05 |

|     |                                                                                                       |                                       |       |      |       |      |          |
|-----|-------------------------------------------------------------------------------------------------------|---------------------------------------|-------|------|-------|------|----------|
| 160 | med_area_home <18.804 (p57) &POI_pp_sports <8.311 (p31)                                               | rate_imported12 =0.002-0.086 (p36-66) | 40.80 | 0.71 | 23.79 | 0.05 | 7.58E-05 |
| 161 | prop_transport =0.069-0.334 (p36-87) &POI_pp_sports <12.803 (p42)                                     | rate_imported12 =0.004-0.085 (p36-66) | 42.08 | 0.69 | 23.79 | 0.13 | 6.3E-05  |
| 162 | med_income <19892.439 (p65) &build_area_pp <63.409 (p51)                                              | rate_imported12 =0.004-0.103 (p36-69) | 51.91 | 0.61 | 23.76 | 0.08 | 8.2E-05  |
| 163 | gender_ratio <93.932 (p56) &prop_higher_edu <0.314 (p77) &prop_gov_insti_faci >0.027 (p38)            | rate_imported12 =0.003-0.094 (p36-68) | 44.60 | 0.67 | 23.72 | 0.11 | 2.57E-05 |
| 164 | prop_transport =0.070-0.336 (p36-88) &POI_pp_telecom_elec <12.219 (p51)                               | rate_imported12 =0.004-0.117 (p36-71) | 48.55 | 0.68 | 23.68 | 0.12 | 8.13E-06 |
| 165 | den_road =6.383-22.034 (p30-86) &POI_pp_transport <21.035 (p43)                                       | rate_imported12 =0.004-0.081 (p36-64) | 41.97 | 0.66 | 23.66 | 0.11 | 2.75E-05 |
| 166 | prop_transport =0.075-0.346 (p36-90) &POI_pp_transport <20.897 (p43)                                  | rate_imported12 =0.003-0.084 (p36-66) | 41.60 | 0.68 | 23.64 | 0.13 | 2.27E-05 |
| 167 | prop_higher_edu <0.253 (p65) &prop_transport =0.070-0.348 (p36-90) &POI_pp_telecom_elec <12.219 (p51) | rate_imported12 =0.004-0.094 (p36-68) | 40.04 | 0.76 | 23.59 | 0.13 | 2.1E-05  |
| 168 | med_area_home <17.155 (p52) &den_bldg =0.091-0.430 (p31-83)                                           | rate_imported12 =0.004-0.072 (p36-64) | 42.10 | 0.60 | 23.49 | 0.13 | 4.41E-05 |
| 169 | build_area_pp <75.116 (p54) &prop_private_resid =0.006-0.239 (p22-85)                                 | rate_imported12 =0.003-0.078 (p36-64) | 45.27 | 0.58 | 23.49 | 0.14 | 1.33E-06 |
| 170 | med_income <18973.034 (p62) &prop_agricultural <0.055 (p81) &LU_entropy >0.553 (p49)                  | rate_imported12 =0.004-0.081 (p36-64) | 39.89 | 0.70 | 23.48 | 0.15 | 2.48E-06 |
| 171 | med_income <19935.742 (p65) &prop_private_resid =0.010-0.230 (p27-85)                                 | rate_imported12 =0.004-0.087 (p36-67) | 47.91 | 0.59 | 23.47 | 0.17 | 8.22E-09 |
| 172 | prop_preprim_edu <0.134 (p84) &LU_entropy >0.568 (p53) &POI_pp_telecom_elec <5.692 (p33)              | rate_imported12 =0.003-0.089 (p36-67) | 36.69 | 0.84 | 23.46 | 0.07 | 1.37E-05 |
| 173 | med_area_home <16.459 (p49) &den_road =6.383-22.034 (p30-86)                                          | rate_imported12 =0.004-0.081 (p36-64) | 44.22 | 0.61 | 23.43 | 0.10 | 6.03E-05 |
| 174 | med_area_home <15.536 (p45)                                                                           | rate_imported12 =0.005-0.076 (p36-64) | 50.15 | 0.52 | 23.36 | 0.24 | 1.29E-13 |
| 175 | prop_gov_insti_faci >0.030 (p41) &POI_pp_telecom_elec <22.197 (p72)                                   | rate_imported12 =0.003-0.136 (p36-73) | 63.26 | 0.59 | 23.32 | 0.09 | 4.66E-05 |
| 176 | med_income <18838.696 (p62) &prop_transport =0.051-0.322 (p31-86) &POI_pp_mall_mkt <5.231 (p51)       | rate_imported12 =0.004-0.089 (p36-67) | 39.43 | 0.74 | 23.29 | 0.12 | 4.43E-05 |
| 177 | prop_higher_edu <0.232 (p62) &den_public_trans =6.952-79.515 (p35-89)                                 | rate_imported12 =0.003-0.093 (p36-68) | 44.77 | 0.65 | 23.28 | 0.18 | 3.04E-08 |

|     |                                                                                                           |                                       |       |      |       |      |          |
|-----|-----------------------------------------------------------------------------------------------------------|---------------------------------------|-------|------|-------|------|----------|
| 178 | den_public_trans =6.952-79.515 (p35-89) &POI_pp_mall_mkt <4.404 (p47)                                     | rate_imported12 =0.004-0.080 (p36-64) | 42.51 | 0.63 | 23.23 | 0.14 | 1.51E-06 |
| 179 | med_area_home <16.879 (p50) &LU_entropy >0.554 (p50)                                                      | rate_imported12 =0.003-0.078 (p36-64) | 41.47 | 0.64 | 23.21 | 0.14 | 8E-05    |
| 180 | den_population >15857.093 (p47) &prop_private_resid =0.009-0.201 (p26-83) &POI_pp_sports <21.567 (p56)    | rate_imported12 =0.004-0.067 (p36-62) | 36.14 | 0.69 | 23.21 | 0.14 | 4.19E-05 |
| 181 | den_public_trans =10.237-71.472 (p38-86) &POI_pp_edu <12.318 (p57)                                        | rate_imported12 =0.004-0.089 (p36-67) | 44.80 | 0.63 | 23.19 | 0.15 | 1.83E-05 |
| 182 | med_income <19447.658 (p63) &prop_business =0.001-0.054 (p32-86)                                          | rate_imported12 =0.004-0.106 (p36-70) | 49.52 | 0.62 | 23.07 | 0.14 | 3.5E-07  |
| 183 | med_income <19079.165 (p63) &den_population =12488.876-93890.455 (p44-93)                                 | rate_imported12 =0.004-0.093 (p36-68) | 46.39 | 0.62 | 23.00 | 0.14 | 1.84E-06 |
| 184 | LU_entropy >0.568 (p53) &POI_pp_telecom_elec <5.692 (p33)                                                 | rate_imported12 =0.004-0.072 (p36-64) | 35.53 | 0.75 | 23.00 | 0.14 | 6.64E-05 |
| 185 | den_population >16869.874 (p49) &prop_private_resid =0.012-0.231 (p30-85) &POI_pp_transport <17.102 (p38) | rate_imported12 =0.003-0.071 (p36-64) | 33.75 | 0.82 | 23.00 | 0.12 | 1.06E-05 |
| 186 | den_population =10945.965-84346.226 (p43-91) &POI_pp_mall_mkt <4.218 (p47)                                | rate_imported12 =0.004-0.068 (p36-62) | 37.37 | 0.65 | 22.99 | 0.19 | 1.69E-05 |
| 187 | den_road =6.383-22.034 (p30-86) &POI_pp_mall_mkt <3.900 (p45)                                             | rate_imported12 =0.004-0.081 (p36-64) | 41.71 | 0.64 | 22.99 | 0.13 | 1.13E-05 |
| 188 | prop_preprim_edu <0.134 (p84) &med_area_home <16.409 (p49)                                                | rate_imported12 =0.006-0.081 (p36-64) | 47.17 | 0.52 | 22.95 | 0.05 | 7.38E-05 |
| 189 | prop_business =0.001-0.047 (p29-86) &POI_pp_mall_mkt <9.030 (p66)                                         | rate_imported12 =0.005-0.127 (p36-72) | 57.92 | 0.60 | 22.95 | 0.10 | 1.38E-05 |
| 190 | prop_preprim_edu =0.079-0.133 (p17-84) &LU_entropy >0.567 (p52) &POI_pp_sports <10.374 (p38)              | rate_imported12 =0.005-0.084 (p36-66) | 36.99 | 0.78 | 22.95 | 0.07 | 2.04E-05 |
| 191 | prop_business =0.001-0.054 (p32-86) &POI_pp_edu <19.478 (p74)                                             | rate_imported12 =0.003-0.141 (p36-74) | 59.67 | 0.62 | 22.95 | 0.08 | 1.85E-05 |
| 192 | prop_higher_edu <0.253 (p65) &prop_transport =0.070-0.348 (p36-90) &POI_pp_mall_mkt <5.865 (p53)          | rate_imported12 =0.004-0.081 (p36-64) | 38.05 | 0.72 | 22.93 | 0.13 | 9.95E-06 |
| 193 | prop_higher_edu <0.248 (p64) &den_bldg =0.089-0.407 (p30-82) &prop_agricultural <0.053 (p81)              | rate_imported12 =0.004-0.081 (p36-64) | 40.77 | 0.65 | 22.83 | 0.09 | 5.66E-05 |
| 194 | prop_higher_edu <0.255 (p65) &den_road >6.850 (p32) &POI_pp_edu <11.270 (p53)                             | rate_imported12 =0.004-0.077 (p36-64) | 39.78 | 0.66 | 22.81 | 0.12 | 6.07E-05 |
| 195 | prop_higher_edu <0.246 (p64) &prop_agricultural <0.055 (p81) &LU_entropy >0.553 (p49)                     | rate_imported12 =0.004-0.081 (p36-64) | 39.01 | 0.69 | 22.81 | 0.14 | 9.56E-06 |



|     |                                                                                               |                                       |       |      |       |      |          |
|-----|-----------------------------------------------------------------------------------------------|---------------------------------------|-------|------|-------|------|----------|
| 196 | prop_transport =0.079-0.345 (p36-90) &POI_pp_mall_mkt <3.722 (p44)                            | rate_imported12 =0.002-0.090 (p36-67) | 40.72 | 0.69 | 22.78 | 0.16 | 6.75E-06 |
| 197 | med_area_home <19.336 (p61) &prop_business =0.001-0.054 (p32-86)                              | rate_imported12 =0.003-0.116 (p36-71) | 51.98 | 0.62 | 22.74 | 0.12 | 2.09E-05 |
| 198 | LU_entropy >0.567 (p52) &POI_pp_transport <13.768 (p33)                                       | rate_imported12 =0.004-0.070 (p36-63) | 35.03 | 0.74 | 22.74 | 0.11 | 4.46E-05 |
| 199 | den_road =6.383-22.034 (p30-86) &POI_pp_sports <14.115 (p45)                                  | rate_imported12 =0.004-0.071 (p36-64) | 40.05 | 0.61 | 22.72 | 0.11 | 5.76E-05 |
| 200 | prop_higher_edu <0.246 (p64) &den_bldg >0.098 (p33) &POI_pp_edu <12.697 (p59)                 | rate_imported12 =0.004-0.070 (p36-63) | 38.65 | 0.62 | 22.70 | 0.13 | 7.05E-05 |
| 201 | den_bldg =0.090-0.439 (p30-84) &POI_pp_telecom_elec <11.375 (p50)                             | rate_imported12 =0.004-0.070 (p36-64) | 40.67 | 0.59 | 22.70 | 0.12 | 4.31E-05 |
| 202 | gender_ratio <96.234 (p71) &prop_preprim_edu <0.130 (p83) &LU_entropy >0.565 (p52)            | rate_imported12 =0.003-0.082 (p36-65) | 41.72 | 0.63 | 22.65 | 0.10 | 7.92E-06 |
| 203 | den_public_trans =10.237-71.472 (p38-86) &POI_pp_sports <16.304 (p50)                         | rate_imported12 =0.003-0.076 (p36-64) | 40.85 | 0.62 | 22.60 | 0.14 | 4.32E-06 |
| 204 | den_bldg =0.089-0.418 (p30-83) &POI_pp_mall_mkt <3.751 (p44)                                  | rate_imported12 =0.004-0.072 (p36-64) | 38.70 | 0.64 | 22.59 | 0.14 | 4.76E-05 |
| 205 | den_population >17259.193 (p50) &POI_pp_transport <27.262 (p50)                               | rate_imported12 =0.003-0.075 (p36-64) | 41.91 | 0.59 | 22.58 | 0.11 | 3.87E-05 |
| 206 | build_area_pp <58.262 (p47) &prop_transport =0.078-0.342 (p36-89)                             | rate_imported12 =0.004-0.086 (p36-66) | 41.65 | 0.65 | 22.58 | 0.14 | 1.42E-05 |
| 207 | prop_preprim_edu =0.079-0.133 (p17-84) &build_area_pp <106.473 (p71) &LU_entropy >0.567 (p52) | rate_imported12 =0.003-0.099 (p36-68) | 41.08 | 0.71 | 22.55 | 0.11 | 4.23E-05 |
| 208 | den_bldg =0.086-0.380 (p29-81) &build_area_pp <62.960 (p50)                                   | rate_imported12 =0.004-0.080 (p36-64) | 40.78 | 0.64 | 22.52 | 0.15 | 1.38E-05 |
| 209 | den_population >16592.806 (p49) &POI_pp_edu <12.477 (p58)                                     | rate_imported12 =0.004-0.080 (p36-64) | 44.74 | 0.58 | 22.51 | 0.13 | 2.88E-06 |
| 210 | den_public_trans =10.237-71.472 (p38-86) &POI_pp_telecom_elec <11.661 (p50)                   | rate_imported12 =0.003-0.077 (p36-64) | 41.33 | 0.61 | 22.51 | 0.13 | 4.29E-05 |
| 211 | prop_higher_edu <0.233 (p62) &den_population =9845.500-83930.990 (p41-91)                     | rate_imported12 =0.003-0.106 (p36-70) | 42.83 | 0.70 | 22.43 | 0.21 | 2.38E-08 |
| 212 | med_area_home <19.931 (p65) &prop_gov_insti_faci >0.027 (p38)                                 | rate_imported12 =0.004-0.108 (p36-70) | 56.38 | 0.56 | 22.39 | 0.09 | 3.25E-05 |
| 213 | med_income <21090.857 (p74) &POI_pp_mall_mkt <2.660 (p31)                                     | rate_imported12 =0.004-0.095 (p36-68) | 40.90 | 0.69 | 22.36 | 0.07 | 1.95E-05 |

|            |                                                                                                                  |                                       |       |      |       |      |          |
|------------|------------------------------------------------------------------------------------------------------------------|---------------------------------------|-------|------|-------|------|----------|
| <b>214</b> | med_area_home <18.228 (p55) &den_population =9467.160-80223.910 (p41-89)                                         | rate_imported12 =0.004-0.107 (p36-70) | 47.79 | 0.62 | 22.25 | 0.11 | 5.88E-05 |
| <b>215</b> | den_population =13879.788-89721.699 (p45-93) &POI_pp_sports <16.482 (p50)                                        | rate_imported12 =0.003-0.071 (p36-64) | 38.38 | 0.62 | 22.23 | 0.16 | 6.63E-05 |
| <b>216</b> | prop_transport =0.070-0.348 (p36-90) &POI_pp_edu <9.455 (p50)                                                    | rate_imported12 =0.003-0.088 (p36-67) | 42.66 | 0.62 | 22.16 | 0.13 | 1.84E-05 |
| <b>217</b> | med_income <20840.493 (p73) &POI_pp_edu <5.101 (p32)                                                             | rate_imported12 =0.003-0.082 (p36-65) | 39.12 | 0.67 | 22.16 | 0.07 | 7.22E-05 |
| <b>218</b> | den_population >17310.573 (p50) &LU_entropy >0.561 (p52)                                                         | rate_imported12 =0.003-0.085 (p36-66) | 38.69 | 0.69 | 22.13 | 0.23 | 6.29E-08 |
| <b>219</b> | gender_ratio <95.996 (p70) &den_population >15949.690 (p48)                                                      | rate_imported12 =0.003-0.145 (p36-74) | 58.21 | 0.62 | 22.11 | 0.08 | 3.76E-05 |
| <b>220</b> | prop_preprim_edu <0.134 (p84) &build_area_pp <73.363 (p54)                                                       | rate_imported12 =0.007-0.108 (p36-70) | 56.12 | 0.54 | 22.08 | 0.05 | 7.56E-05 |
| <b>221</b> | med_income <19664.302 (p65) &prop_gov_insti_faci >0.035 (p44)                                                    | rate_imported12 =0.003-0.085 (p36-66) | 46.23 | 0.57 | 21.93 | 0.14 | 5.83E-07 |
| <b>222</b> | gender_ratio <93.775 (p54) &build_area_pp <81.017 (p57)                                                          | rate_imported12 =0.004-0.083 (p36-66) | 45.27 | 0.57 | 21.92 | 0.13 | 1.97E-05 |
| <b>223</b> | den_road =6.383-22.034 (p30-86) &POI_pp_edu <9.176 (p50)                                                         | rate_imported12 =0.004-0.074 (p36-64) | 40.37 | 0.59 | 21.90 | 0.13 | 3.64E-05 |
| <b>224</b> | prop_preprim_edu <0.131 (p83) &prop_private_resid =0.004-0.220 (p21-84) &LU_entropy >0.557 (p50)                 | rate_imported12 =0.004-0.100 (p36-68) | 45.10 | 0.63 | 21.88 | 0.07 | 4.64E-05 |
| <b>225</b> | gender_ratio <96.234 (p71) &prop_preprim_edu <0.130 (p83)                                                        | rate_imported12 =0.004-0.158 (p36-76) | 73.68 | 0.57 | 21.85 | 0.07 | 1.71E-06 |
| <b>226</b> | gender_ratio <95.341 (p66) &med_income <18973.034 (p62)                                                          | rate_imported12 =0.004-0.099 (p36-68) | 52.57 | 0.55 | 21.81 | 0.11 | 1.25E-05 |
| <b>227</b> | med_income <18973.034 (p62) &prop_transport =0.061-0.335 (p35-87)                                                | rate_imported12 =0.004-0.092 (p36-67) | 46.01 | 0.59 | 21.79 | 0.16 | 9.77E-07 |
| <b>228</b> | den_bldg =0.089-0.398 (p30-82) &POI_pp_edu <7.588 (p45)                                                          | rate_imported12 =0.004-0.070 (p36-64) | 37.03 | 0.63 | 21.79 | 0.16 | 4.53E-05 |
| <b>229</b> | prop_preprim_edu =0.083-0.131 (p23-83) &prop_agricultural <0.047 (p79) &POI_pp_mall_mkt <7.465 (p61)             | rate_imported12 =0.005-0.083 (p36-65) | 43.01 | 0.59 | 21.74 | 0.07 | 1.5E-05  |
| <b>230</b> | prop_agricultural <0.047 (p79) &POI_pp_transport <39.835 (p61)                                                   | rate_imported12 =0.004-0.083 (p36-65) | 53.15 | 0.50 | 21.73 | 0.05 | 6.01E-05 |
| <b>231</b> | med_income <18949.418 (p62) &den_road =5.239-22.537 (p25-87)                                                     | rate_imported12 =0.003-0.109 (p36-70) | 49.93 | 0.59 | 21.56 | 0.14 | 2.5E-07  |
| <b>232</b> | prop_preprim_edu =0.085-0.127 (p25-82) &med_income <19433.607 (p63) &den_population =6277.989-86263.688 (p37-91) | rate_imported12 =0.005-0.105 (p36-69) | 39.46 | 0.72 | 21.50 | 0.11 | 3.71E-05 |

|            |                                                                                                   |                                       |       |      |       |      |          |
|------------|---------------------------------------------------------------------------------------------------|---------------------------------------|-------|------|-------|------|----------|
| <b>233</b> | gender_ratio <93.932 (p56) &prop_gov_insti_faci >0.027 (p38)                                      | rate_imported12 =0.005-0.122 (p36-71) | 52.09 | 0.60 | 21.44 | 0.10 | 1.17E-05 |
| <b>234</b> | med_income <18814.295 (p62) &den_bldg =0.093-0.420 (p31-83)                                       | rate_imported12 =0.004-0.084 (p36-66) | 43.42 | 0.58 | 21.31 | 0.15 | 1.09E-05 |
| <b>235</b> | prop_preprim_edu =0.072-0.129 (p11-82) &prop_gov_insti_faci >0.027 (p38) &LU_entropy >0.555 (p50) | rate_imported12 =0.003-0.127 (p36-72) | 42.89 | 0.72 | 21.31 | 0.09 | 6.35E-05 |
| <b>236</b> | POI_pp_sports <6.556 (p22)                                                                        | rate_imported12 =0.004-0.108 (p36-70) | 37.48 | 0.77 | 21.29 | 0.44 | 1.32E-13 |
| <b>237</b> | den_population >16307.647 (p48) &LU_entropy >0.567 (p52) &POI_pp_edu <8.527 (p49)                 | rate_imported12 =0.005-0.064 (p36-60) | 31.69 | 0.71 | 21.21 | 0.11 | 3.6E-05  |
| <b>238</b> | prop_publicResid >0.034 (p69)                                                                     | rate_imported12 =0.002-0.103 (p36-69) | 43.49 | 0.63 | 21.17 | 0.30 | 1.54E-12 |
| <b>239</b> | prop_higher_edu <0.258 (p65) &den_road =6.383-22.034 (p30-86)                                     | rate_imported12 =0.003-0.097 (p36-68) | 45.31 | 0.59 | 21.06 | 0.15 | 4.11E-07 |
| <b>240</b> | prop_agricultural <0.046 (p79) &POI_pp_mall_mkt <7.099 (p60)                                      | rate_imported12 =0.003-0.084 (p36-66) | 50.81 | 0.51 | 21.06 | 0.07 | 7.55E-05 |
| <b>241</b> | prop_higher_edu <0.214 (p55) &prop_private_resid =0.010-0.233 (p27-85)                            | rate_imported12 =0.002-0.106 (p36-69) | 41.55 | 0.67 | 21.06 | 0.22 | 4.55E-07 |
| <b>242</b> | gender_ratio <96.322 (p71) &prop_private_resid =0.010-0.230 (p27-85)                              | rate_imported12 =0.003-0.081 (p36-64) | 49.53 | 0.50 | 21.03 | 0.09 | 2.44E-06 |
| <b>243</b> | prop_agricultural <0.049 (p80) &POI_pp_edu <14.017 (p64)                                          | rate_imported12 =0.002-0.083 (p36-65) | 52.28 | 0.49 | 21.02 | 0.06 | 3.41E-05 |
| <b>244</b> | prop_higher_edu <0.225 (p58) &prop_gov_insti_faci >0.027 (p38)                                    | rate_imported12 =0.003-0.126 (p36-72) | 47.45 | 0.65 | 21.01 | 0.17 | 2.43E-06 |
| <b>245</b> | prop_preprim_edu =0.080-0.138 (p19-85) &den_bldg =0.084-0.424 (p29-83)                            | rate_imported12 =0.003-0.116 (p36-71) | 50.31 | 0.59 | 20.96 | 0.13 | 6.3E-05  |
| <b>246</b> | prop_higher_edu <0.260 (p65) &prop_business =0.003-0.064 (p43-87)                                 | rate_imported12 =0.004-0.074 (p36-64) | 38.50 | 0.59 | 20.94 | 0.17 | 1.63E-07 |
| <b>247</b> | prop_preprim_edu =0.072-0.129 (p11-82) &prop_gov_insti_faci >0.027 (p38)                          | rate_imported12 =0.003-0.153 (p36-75) | 61.07 | 0.60 | 20.93 | 0.09 | 2.57E-05 |
| <b>248</b> | med_income <20533.112 (p73) &prop_agricultural <0.055 (p81)                                       | rate_imported12 =0.004-0.083 (p36-65) | 55.56 | 0.47 | 20.90 | 0.09 | 9.06E-07 |
| <b>249</b> | prop_higher_edu <0.237 (p62) &POI_pp_telecom_elec <21.730 (p71)                                   | rate_imported12 =0.005-0.097 (p36-68) | 52.22 | 0.53 | 20.86 | 0.09 | 6.29E-05 |
| <b>250</b> | med_income <19957.502 (p65) &den_bldg =0.096-0.353 (p32-79) &POI_pp_transport <33.445 (p56)       | rate_imported12 =0.005-0.080 (p36-64) | 35.84 | 0.68 | 20.85 | 0.10 | 2.6E-05  |
| <b>251</b> | build_area_pp <51.859 (p43)                                                                       | rate_imported12 =0.004-0.105 (p36-69) | 50.34 | 0.56 | 20.82 | 0.23 | 9.92E-10 |
| <b>252</b> | gender_ratio <93.712 (p53) &prop_higher_edu <0.326 (p79)                                          | rate_imported12 =0.004-0.096 (p36-68) | 50.54 | 0.54 | 20.76 | 0.07 | 7.49E-05 |

|            |                                                                                              |                                       |       |      |       |      |          |
|------------|----------------------------------------------------------------------------------------------|---------------------------------------|-------|------|-------|------|----------|
| <b>253</b> | prop_business =0.003-0.044 (p43-85) &POI_pp_sports <27.447 (p64)                             | rate_imported12 =0.004-0.132 (p36-73) | 47.48 | 0.65 | 20.64 | 0.10 | 4.62E-05 |
| <b>254</b> | POI_pp_edu <3.533 (p20)                                                                      | rate_imported12 =0.003-0.078 (p36-64) | 32.83 | 0.75 | 20.52 | 0.47 | 8.59E-14 |
| <b>255</b> | POI_pp_mall_mkt <1.922 (p22)                                                                 | rate_imported12 =0.003-0.083 (p36-66) | 33.73 | 0.73 | 20.19 | 0.44 | 8.37E-12 |
| <b>256</b> | prop_preprim_edu =0.079-0.126 (p17-82) &prop_private_resid =0.009-0.218 (p26-84)             | rate_imported12 =0.004-0.104 (p36-69) | 45.83 | 0.59 | 20.16 | 0.13 | 1.39E-05 |
| <b>257</b> | prop_preprim_edu =0.079-0.133 (p17-84) &LU_entropy >0.567 (p52)                              | rate_imported12 =0.003-0.138 (p36-74) | 47.40 | 0.65 | 20.14 | 0.15 | 4.36E-06 |
| <b>258</b> | build_area_pp <83.395 (p58) &LU_entropy >0.563 (p52)                                         | rate_imported12 =0.003-0.084 (p36-66) | 37.61 | 0.59 | 20.05 | 0.18 | 1.97E-05 |
| <b>259</b> | med_income <19957.502 (p65) &den_population >15268.911 (p47) &den_bldg =0.096-0.353 (p32-79) | rate_imported12 =0.004-0.073 (p36-64) | 33.90 | 0.66 | 20.01 | 0.11 | 2.6E-05  |
| <b>260</b> | gender_ratio <93.717 (p53) &prop_open_recreation >0.027 (p46)                                | rate_imported12 =0.003-0.155 (p36-75) | 47.66 | 0.68 | 19.83 | 0.14 | 9.56E-07 |
| <b>261</b> | prop_preprim_edu =0.085-0.127 (p25-82) &den_population =6277.989-86263.688 (p37-91)          | rate_imported12 =0.005-0.105 (p36-69) | 42.92 | 0.61 | 19.78 | 0.14 | 1.02E-06 |
| <b>262</b> | den_population >18336.564 (p50) &den_bldg =0.095-0.431 (p32-83)                              | rate_imported12 =0.004-0.070 (p36-64) | 38.69 | 0.53 | 19.76 | 0.11 | 3.36E-05 |
| <b>263</b> | prop_gov_insti_faci >0.027 (p38) &LU_entropy >0.555 (p50)                                    | rate_imported12 =0.003-0.130 (p36-73) | 46.75 | 0.63 | 19.73 | 0.15 | 2.87E-05 |
| <b>264</b> | prop_higher_edu <0.238 (p63) &prop_open_recreation >0.027 (p46)                              | rate_imported12 =0.003-0.094 (p36-68) | 42.00 | 0.59 | 19.61 | 0.16 | 6.45E-06 |
| <b>265</b> | prop_publicResid >0.049 (p71) &POI_pp_mall_mkt <3.388 (p42)                                  | rate_imported12 =0.002-0.058 (p36-57) | 29.30 | 0.63 | 19.57 | 0.13 | 3.31E-05 |
| <b>266</b> | prop_open_recreation >0.027 (p46) &POI_pp_transport <55.785 (p74)                            | rate_imported12 =0.003-0.107 (p36-70) | 50.38 | 0.54 | 19.42 | 0.10 | 7.29E-05 |
| <b>267</b> | prop_business =0.003-0.044 (p43-85) &LU_entropy >0.561 (p51)                                 | rate_imported12 =0.002-0.138 (p36-74) | 39.66 | 0.73 | 19.25 | 0.17 | 4.79E-05 |
| <b>268</b> | prop_higher_edu <0.230 (p62) &den_bldg =0.099-0.391 (p33-82)                                 | rate_imported12 =0.003-0.090 (p36-67) | 38.82 | 0.61 | 19.20 | 0.16 | 2.73E-07 |
| <b>269</b> | den_bldg =0.096-0.353 (p32-79) &POI_pp_sports <19.959 (p53)                                  | rate_imported12 =0.005-0.080 (p36-64) | 36.68 | 0.59 | 18.90 | 0.13 | 5.88E-05 |
| <b>270</b> | prop_preprim_edu =0.086-0.134 (p26-84) &den_road =7.383-21.682 (p35-86)                      | rate_imported12 =0.004-0.090 (p36-67) | 39.49 | 0.58 | 18.78 | 0.14 | 5.5E-06  |
| <b>271</b> | prop_preprim_edu =0.078-0.131 (p17-83)                                                       | rate_imported12 =0.001-0.160 (p36-78) | 75.11 | 0.54 | 18.76 | 0.13 | 6.1E-11  |
| <b>272</b> | den_road =6.811-21.396 (p31-85) &LU_entropy >0.558 (p50)                                     | rate_imported12 =0.004-0.079 (p36-64) | 39.87 | 0.53 | 18.69 | 0.12 | 4.85E-05 |
| <b>273</b> | prop_business =0.003-0.060 (p43-87)                                                          | rate_imported12 =0.004-0.182 (p36-79) | 58.29 | 0.62 | 18.56 | 0.20 | 1.03E-07 |

|            |                                                                                                       |                                       |        |      |       |      |          |
|------------|-------------------------------------------------------------------------------------------------------|---------------------------------------|--------|------|-------|------|----------|
| <b>274</b> | prop_higher_edu <0.213 (p54) &prop_transport =0.079-0.345 (p36-90)                                    | rate_imported12 =0.002-0.090 (p36-67) | 36.41  | 0.62 | 18.52 | 0.18 | 6.23E-05 |
| <b>275</b> | prop_higher_edu <0.231 (p62) &prop_grassland <0.082 (p71)                                             | rate_imported12 =0.004-0.083 (p36-65) | 42.39  | 0.51 | 18.29 | 0.12 | 5.55E-05 |
| <b>276</b> | prop_private_resid =0.011-0.143 (p28-76) &prop_publicResid >0.063 (p74) &POI_pp_mall_mkt <3.731 (p44) | rate_imported12 =0.004-0.062 (p36-58) | 24.62  | 0.78 | 17.48 | 0.12 | 7.96E-05 |
| <b>277</b> | prop_private_resid =0.002-0.233 (p19-85)                                                              | rate_imported12 =0.005-0.182 (p36-79) | 76.60  | 0.54 | 16.61 | 0.12 | 1.4E-07  |
| <b>278</b> | den_public_trans =13.792-62.916 (p45-84)                                                              | rate_imported12 =0.004-0.140 (p36-74) | 47.67  | 0.58 | 16.59 | 0.20 | 3.65E-07 |
| <b>279</b> | gender_ratio <94.842 (p64)                                                                            | rate_imported12 =0.003-0.116 (p36-71) | 62.32  | 0.47 | 16.52 | 0.12 | 1.15E-06 |
| <b>280</b> | prop_gov_insti_faci >0.030 (p41)                                                                      | rate_imported12 =0.003-0.124 (p36-71) | 62.21  | 0.49 | 16.38 | 0.13 | 3.9E-08  |
| <b>281</b> | den_bldg =0.095-0.431 (p32-83)                                                                        | rate_imported12 =0.003-0.160 (p36-78) | 60.84  | 0.54 | 15.78 | 0.14 | 2.31E-05 |
| <b>282</b> | den_population >26483.860 (p60)                                                                       | rate_imported12 =0.004-0.084 (p36-66) | 40.23  | 0.45 | 15.44 | 0.17 | 8.14E-08 |
| <b>283</b> | den_population >17868.663 (p50) &prop_private_resid =0.020-0.115 (p35-70)                             | rate_imported12 =0.002-0.079 (p36-64) | 26.40  | 0.67 | 15.18 | 0.22 | 2.38E-05 |
| <b>284</b> | den_road =6.811-21.396 (p31-85)                                                                       | rate_imported12 =0.004-0.079 (p36-64) | 45.58  | 0.42 | 14.47 | 0.13 | 8.4E-07  |
| <b>285</b> | LU_entropy >0.561 (p51)                                                                               | rate_imported12 =0.001-0.099 (p36-68) | 46.64  | 0.44 | 13.70 | 0.13 | 6.21E-05 |
| <b>286</b> | prop_transport >0.121 (p50)                                                                           | rate_imported12 =0.004-0.080 (p36-64) | 43.70  | 0.40 | 12.51 | 0.11 | 4.34E-05 |
| <b>287</b> | POI_pp_transport <4.899 (p9)                                                                          | rate_imported12 =0.003-0.084 (p36-66) | 18.09  | 0.89 | 12.07 | 0.59 | 1.59E-08 |
| <b>288</b> | prop_agricultural <0.055 (p81)                                                                        | rate_imported12 =0.003-0.082 (p36-65) | 59.77  | 0.35 | 9.39  | 0.05 | 3.39E-05 |
| <b>289</b> | POI_pp_transport =4.899-8.368 (p9-19)                                                                 | rate_imported12 =0.003-0.084 (p36-66) | 14.37  | 0.74 | 8.63  | 0.44 | 1.21E-05 |
| <b>290</b> | prop_higher_edu >0.260 (p65) &prop_business =0.003-0.064 (p43-87)                                     | rate_imported12 =0.074-0.221 (p64-81) | 13.97  | 0.46 | 8.42  | 0.20 | 7.93E-05 |
| <b>291</b> | med_area_home >18.804 (p57) &POI_pp_sports <8.311 (p31)                                               | rate_imported12 =0.086-0.185 (p66-80) | 2.84   | 0.50 | 2.05  | 0.34 | 4.54E-05 |
| <b>292</b> | prop_higher_edu <0.278 (p71) &med_income <19467.587 (p63)                                             | rate_imported12 <0.112 (p71)          | 119.46 | 0.91 | 26.89 | 0.03 | 3.67E-05 |
| <b>293</b> | prop_higher_edu <0.253 (p65) &POI_pp_transport <39.932 (p61)                                          | rate_imported12 <0.114 (p71)          | 90.29  | 0.94 | 22.56 | 0.06 | 2.23E-05 |
| <b>294</b> | med_income <19583.009 (p65)                                                                           | rate_imported12 <0.110 (p70)          | 120.22 | 0.85 | 22.51 | 0.16 | 1.22E-15 |
| <b>295</b> | med_income <24851.593 (p79) &build_area_pp <77.706 (p56) &POI_pp_telecom_elec <18.818 (p67)           | rate_imported12 <0.071 (p64)          | 79.53  | 0.86 | 21.92 | 0.04 | 3.57E-05 |
| <b>296</b> | build_area_pp <59.805 (p50) &prop_agricultural <0.058 (p82) &POI_pp_telecom_elec <21.508 (p71)        | rate_imported12 <0.079 (p64)          | 76.70  | 0.89 | 21.08 | 0.03 | 1.84E-05 |
| <b>297</b> | build_area_pp <67.567 (p52) &prop_agricultural <0.055 (p81) &POI_pp_sports <31.736 (p69)              | rate_imported12 <0.077 (p64)          | 76.26  | 0.88 | 21.01 | 0.04 | 2.06E-06 |

|     |                                                                                             |                              |        |      |       |      |          |
|-----|---------------------------------------------------------------------------------------------|------------------------------|--------|------|-------|------|----------|
| 298 | build_area_pp <70.858 (p53) &prop_agricultural <0.058 (p82) &POI_pp_transport <39.782 (p61) | rate_imported12 <0.079 (p64) | 74.53  | 0.90 | 21.00 | 0.03 | 1.05E-05 |
| 299 | med_income <24883.283 (p79) &build_area_pp <80.385 (p56) &prop_agricultural <0.040 (p77)    | rate_imported12 <0.074 (p64) | 79.49  | 0.86 | 20.66 | 0.06 | 4.57E-05 |
| 300 | med_area_home <19.135 (p61) &build_area_pp <91.533 (p62) &POI_pp_transport <23.482 (p47)    | rate_imported12 <0.084 (p66) | 67.79  | 0.94 | 20.27 | 0.05 | 1.98E-06 |
| 301 | med_income <25039.531 (p81) &den_population >15501.310 (p47) &build_area_pp <78.375 (p56)   | rate_imported12 <0.079 (p64) | 70.58  | 0.90 | 19.86 | 0.04 | 5.42E-05 |
| 302 | prop_higher_edu <0.233 (p62) &prop_publicResid <0.005 (p56)                                 | rate_imported12 <0.003 (p36) | 39.78  | 0.71 | 19.48 | 0.25 | 2.68E-07 |
| 303 | prop_higher_edu <0.255 (p65) &build_area_pp <87.354 (p62) &POI_pp_sports <14.086 (p45)      | rate_imported12 <0.077 (p64) | 59.91  | 0.93 | 19.31 | 0.05 | 2.38E-05 |
| 304 | prop_over65 >0.133 (p29) &POI_pp_mall_mkt <10.180 (p72)                                     | rate_imported12 <0.090 (p67) | 93.01  | 0.84 | 19.28 | 0.10 | 5.97E-07 |
| 305 | ave_household_size <3.155 (p84) &POI_pp_mall_mkt <6.852 (p59)                               | rate_imported12 <0.094 (p68) | 93.10  | 0.85 | 18.75 | 0.05 | 6.87E-05 |
| 306 | ave_household_size <3.207 (p87) &POI_pp_edu <11.974 (p55)                                   | rate_imported12 <0.102 (p69) | 92.38  | 0.86 | 18.40 | 0.05 | 4.74E-05 |
| 307 | prop_over65 >0.130 (p26) &POI_pp_edu <14.477 (p66)                                          | rate_imported12 <0.090 (p67) | 87.67  | 0.84 | 18.25 | 0.08 | 2.45E-05 |
| 308 | prop_preprim_edu >0.097 (p52) &prop_publicResid <0.005 (p56)                                | rate_imported12 <0.003 (p36) | 39.13  | 0.67 | 18.20 | 0.18 | 2.35E-05 |
| 309 | prop_over65 >0.130 (p26) &POI_pp_telecom_elec <18.764 (p66)                                 | rate_imported12 <0.090 (p67) | 89.24  | 0.84 | 18.08 | 0.08 | 8.13E-06 |
| 310 | prop_preprim_edu >0.083 (p22) &ave_household_size <3.207 (p87)                              | rate_imported12 <0.102 (p69) | 117.86 | 0.81 | 18.03 | 0.05 | 4.35E-05 |
| 311 | prop_over65 >0.133 (p29) &POI_pp_transport <36.836 (p59)                                    | rate_imported12 <0.090 (p67) | 79.39  | 0.86 | 18.03 | 0.09 | 5.94E-06 |
| 312 | prop_higher_edu <0.170 (p37)                                                                | rate_imported12 <0.039 (p50) | 57.65  | 0.73 | 17.91 | 0.23 | 3.65E-07 |
| 313 | ave_household_size <3.138 (p84) &build_area_pp <62.626 (p50)                                | rate_imported12 <0.114 (p71) | 84.84  | 0.89 | 17.51 | 0.04 | 4.49E-05 |
| 314 | prop_higher_edu <0.214 (p55) &prop_private_resid <0.010 (p27)                               | rate_imported12 <0.002 (p36) | 34.06  | 0.74 | 17.48 | 0.10 | 8.1E-05  |
| 315 | med_income <19935.742 (p65) &prop_private_resid <0.010 (p27)                                | rate_imported12 <0.004 (p36) | 34.33  | 0.73 | 17.35 | 0.09 | 8.1E-05  |
| 316 | med_income <20388.464 (p73) &build_area_pp >63.378 (p51) &prop_open_recreation <0.050 (p62) | rate_imported12 <0.003 (p36) | 33.63  | 0.74 | 17.28 | 0.18 | 2.76E-06 |

|            |                                                                                             |                              |       |      |       |      |          |
|------------|---------------------------------------------------------------------------------------------|------------------------------|-------|------|-------|------|----------|
| <b>317</b> | ave_household_size <3.102 (p84) &POI_pp_sports <25.681 (p63)                                | rate_imported12 <0.113 (p71) | 92.72 | 0.86 | 16.84 | 0.05 | 5.22E-05 |
| <b>318</b> | build_area_pp <68.225 (p52) &prop_agricultural <0.063 (p82)                                 | rate_imported12 <0.084 (p66) | 82.98 | 0.80 | 16.71 | 0.03 | 1.17E-05 |
| <b>319</b> | prop_higher_edu <0.233 (p62) &den_population <9845.500 (p41)                                | rate_imported12 <0.003 (p36) | 36.21 | 0.66 | 16.54 | 0.18 | 4.44E-05 |
| <b>320</b> | prop_over65 >0.142 (p36) &prop_private_resid <0.092 (p64)<br>&prop_publicResid <0.005 (p56) | rate_imported12 <0.002 (p36) | 30.62 | 0.78 | 16.48 | 0.21 | 2.11E-05 |
| <b>321</b> | med_income <19664.302 (p65) &prop_gov_insti_faci <0.035 (p44)                               | rate_imported12 <0.003 (p36) | 37.67 | 0.63 | 16.04 | 0.13 | 1.45E-05 |
| <b>322</b> | prop_higher_edu <0.225 (p58) &prop_gov_insti_faci <0.027 (p38)                              | rate_imported12 <0.003 (p36) | 35.07 | 0.66 | 16.03 | 0.15 | 2.5E-05  |
| <b>323</b> | prop_private_resid <0.002 (p19)                                                             | rate_imported12 <0.005 (p36) | 30.69 | 0.75 | 16.01 | 0.39 | 4.1E-09  |
| <b>324</b> | prop_higher_edu <0.214 (p55) &build_area_pp >69.812 (p53)<br>&prop_business <0.004 (p51)    | rate_imported12 <0.004 (p36) | 27.94 | 0.83 | 15.78 | 0.13 | 5.44E-05 |
| <b>325</b> | prop_higher_edu <0.232 (p62) &den_public_trans <6.952 (p35)                                 | rate_imported12 <0.003 (p36) | 33.28 | 0.68 | 15.59 | 0.17 | 4.86E-05 |
| <b>326</b> | med_income <19079.165 (p63) &den_population <12488.876<br>(p44)                             | rate_imported12 <0.004 (p36) | 32.31 | 0.68 | 15.27 | 0.21 | 8.1E-05  |
| <b>327</b> | prop_higher_edu <0.213 (p54) &prop_transport <0.079 (p36)                                   | rate_imported12 <0.002 (p36) | 31.98 | 0.68 | 15.14 | 0.20 | 4.72E-05 |
| <b>328</b> | prop_over65 >0.140 (p35) &den_population <4756.972 (p34)                                    | rate_imported12 <0.003 (p36) | 29.97 | 0.72 | 14.96 | 0.18 | 4.73E-05 |
| <b>329</b> | med_income <19957.502 (p65) &POI_pp_telecom_elec >12.854<br>(p53)                           | rate_imported12 <0.003 (p36) | 36.45 | 0.61 | 14.93 | 0.17 | 7.26E-05 |
| <b>330</b> | prop_higher_edu <0.212 (p54) &build_area_pp >63.378 (p51)                                   | rate_imported12 <0.003 (p36) | 32.02 | 0.67 | 14.89 | 0.20 | 2.11E-05 |
| <b>331</b> | prop_business <0.003 (p43)                                                                  | rate_imported12 <0.004 (p36) | 47.88 | 0.52 | 14.64 | 0.16 | 1.82E-05 |
| <b>332</b> | den_public_trans <3.592 (p25)                                                               | rate_imported12 <0.004 (p36) | 33.98 | 0.63 | 14.57 | 0.27 | 1.77E-06 |
| <b>333</b> | prop_higher_edu <0.230 (p62) &den_bldg <0.099 (p33)                                         | rate_imported12 <0.003 (p36) | 31.30 | 0.67 | 14.53 | 0.16 | 4.73E-05 |
| <b>334</b> | prop_preprim_edu >0.131 (p83)                                                               | rate_imported12 <0.001 (p36) | 28.77 | 0.73 | 14.52 | 0.37 | 3.28E-10 |
| <b>335</b> | med_income <18984.449 (p62) &den_public_trans <6.952 (p35)                                  | rate_imported12 <0.004 (p36) | 28.98 | 0.71 | 14.34 | 0.20 | 7.88E-05 |
| <b>336</b> | prop_over65 >0.144 (p36) &prop_transport <0.037 (p26)                                       | rate_imported12 <0.002 (p36) | 25.44 | 0.80 | 13.98 | 0.23 | 1.14E-05 |
| <b>337</b> | med_income <19957.502 (p65) &POI_pp_transport >31.324 (p53)                                 | rate_imported12 <0.004 (p36) | 34.38 | 0.61 | 13.95 | 0.16 | 4E-05    |
| <b>338</b> | med_income <18814.295 (p62) &den_bldg <0.093 (p31)                                          | rate_imported12 <0.004 (p36) | 26.44 | 0.75 | 13.80 | 0.23 | 5.83E-05 |
| <b>339</b> | prop_over65 >0.143 (p36) &den_road <5.001 (p24)                                             | rate_imported12 <0.003 (p36) | 24.76 | 0.80 | 13.58 | 0.22 | 2.13E-05 |

|            |                                                                                                 |                              |        |      |       |      |          |
|------------|-------------------------------------------------------------------------------------------------|------------------------------|--------|------|-------|------|----------|
| <b>340</b> | med_income <18973.034 (p62) &prop_transport <0.061 (p35)                                        | rate_imported12 <0.004 (p36) | 26.83  | 0.72 | 13.36 | 0.21 | 7.55E-05 |
| <b>341</b> | med_income <18949.418 (p62) &den_road <5.239 (p25)                                              | rate_imported12 <0.003 (p36) | 23.54  | 0.81 | 13.07 | 0.24 | 4.96E-05 |
| <b>342</b> | prop_gov_insti_faci <0.030 (p41)                                                                | rate_imported12 <0.003 (p36) | 43.91  | 0.51 | 12.80 | 0.15 | 7.14E-05 |
| <b>343</b> | build_area_pp >71.028 (p53) &prop_rural_set >0.026 (p66)                                        | rate_imported12 <0.004 (p36) | 26.61  | 0.69 | 12.69 | 0.22 | 1.88E-05 |
| <b>344</b> | prop_industrial >0.009 (p70)                                                                    | rate_imported12 <0.097 (p68) | 57.23  | 0.85 | 12.45 | 0.19 | 1.33E-05 |
| <b>345</b> | ave_household_size <3.250 (p87)                                                                 | rate_imported12 <0.110 (p70) | 141.84 | 0.76 | 12.11 | 0.06 | 6.18E-09 |
| <b>346</b> | prop_over65 >0.150 (p43) &den_road <14.014 (p63)<br>&build_area_pp >81.017 (p57)                | rate_imported12 <0.002 (p36) | 22.99  | 0.76 | 12.09 | 0.21 | 4.05E-05 |
| <b>347</b> | prop_over65 >0.140 (p35)                                                                        | rate_imported12 <0.083 (p65) | 100.87 | 0.72 | 11.69 | 0.08 | 5.07E-05 |
| <b>348</b> | prop_publicResid <0.005 (p56) &prop_industrial >0.009 (p70)                                     | rate_imported12 <0.007 (p36) | 22.83  | 0.72 | 11.30 | 0.27 | 1.48E-05 |
| <b>349</b> | den_bldg =0.082-0.432 (p28-83) &prop_agricultural <0.058 (p82)<br>&POI_pp_mall_mkt <2.114 (p24) | rate_imported12 <0.079 (p64) | 35.31  | 0.95 | 11.29 | 0.04 | 1.74E-05 |
| <b>350</b> | prop_agricultural >0.055 (p81)                                                                  | rate_imported12 <0.003 (p36) | 25.97  | 0.63 | 11.25 | 0.27 | 2.23E-05 |
| <b>351</b> | prop_higher_edu <0.237 (p62) &POI_pp_telecom_elec >21.730<br>(p71)                              | rate_imported12 <0.005 (p36) | 22.09  | 0.72 | 11.00 | 0.26 | 7.34E-05 |
| <b>352</b> | prop_transport <0.033 (p23)                                                                     | rate_imported12 <0.004 (p36) | 28.78  | 0.57 | 10.76 | 0.21 | 5.29E-05 |
| <b>353</b> | prop_rural_set >0.069 (p80)                                                                     | rate_imported12 <0.003 (p36) | 26.33  | 0.60 | 10.61 | 0.24 | 4.17E-05 |
| <b>354</b> | prop_preprim_edu >0.093 (p43) &den_bldg <0.205 (p57)<br>&build_area_pp =68.225-212.874 (p52-90) | rate_imported12 <0.003 (p36) | 20.36  | 0.72 | 10.19 | 0.18 | 2.77E-05 |
| <b>355</b> | build_area_pp >63.378 (p51) &prop_industrial >0.009 (p70)<br>&prop_open_recreation <0.050 (p62) | rate_imported12 <0.003 (p36) | 18.96  | 0.77 | 10.12 | 0.19 | 3.2E-05  |
| <b>356</b> | den_population <673.564 (p13)                                                                   | rate_imported12 <0.004 (p36) | 18.89  | 0.70 | 9.22  | 0.34 | 3.94E-06 |
| <b>357</b> | med_income <17777.670 (p56) &med_area_home >19.469 (p61)                                        | rate_imported12 <0.004 (p36) | 15.83  | 0.79 | 8.63  | 0.35 | 5.62E-05 |
| <b>358</b> | prop_industrial >0.009 (p70) &POI_pp_telecom_elec >18.233<br>(p65)                              | rate_imported12 <0.003 (p36) | 15.02  | 0.80 | 8.28  | 0.35 | 6.7E-05  |
| <b>359</b> | prop_industrial >0.008 (p70) &POI_pp_sports >28.416 (p66)                                       | rate_imported12 <0.003 (p36) | 14.99  | 0.79 | 8.19  | 0.35 | 8.21E-06 |



(c) Rules for wave-2 local case rate; POI accessibility was used

| No. | Antecedent                                                                                     | Consequent               | Supp  | Conf | Lev   | Imp  | P         |
|-----|------------------------------------------------------------------------------------------------|--------------------------|-------|------|-------|------|-----------|
| 1   | prop_higher_edu <0.224 (p58) &med_area_home <15.648 (p45) &POI_pp_telecom_elec <20.441 (p69)   | rate_local3 >0.327 (p52) | 56.26 | 0.78 | 22.07 | 0.06 | 3.013E-06 |
| 2   | prop_higher_edu <0.224 (p58) &med_area_home <15.648 (p45) &POI_pp_transport <51.157 (p72)      | rate_local3 >0.326 (p52) | 56.20 | 0.78 | 22.04 | 0.06 | 1.984E-05 |
| 3   | med_income <25645.373 (p81) &den_road >8.946 (p43)                                             | rate_local3 >0.371 (p57) | 62.10 | 0.66 | 21.68 | 0.14 | 2.24E-07  |
| 4   | med_income <21576.614 (p75) &prop_transport >0.093 (p39)                                       | rate_local3 >0.373 (p57) | 60.96 | 0.66 | 21.64 | 0.14 | 4.513E-06 |
| 5   | prop_higher_edu <0.224 (p58) &med_area_home <15.648 (p45) &POI_pp_mall_mkt <12.024 (p79)       | rate_local3 >0.336 (p54) | 54.81 | 0.76 | 21.50 | 0.05 | 2.288E-05 |
| 6   | med_income <25727.745 (p81) &prop_shrubland <0.115 (p58)                                       | rate_local3 >0.372 (p57) | 63.91 | 0.64 | 21.37 | 0.12 | 3.952E-06 |
| 7   | prop_preprim_edu <0.141 (p86) &prop_higher_edu <0.222 (p58) &POI_pp_telecom_elec <18.695 (p66) | rate_local3 >0.302 (p50) | 60.34 | 0.77 | 21.29 | 0.05 | 5.614E-05 |
| 8   | prop_higher_edu <0.224 (p58) &med_area_home <15.648 (p45) &POI_pp_edu <20.907 (p78)            | rate_local3 >0.278 (p47) | 59.04 | 0.83 | 21.18 | 0.06 | 1.283E-05 |
| 9   | med_area_home <19.284 (p61) &prop_transport >0.092 (p39)                                       | rate_local3 >0.373 (p57) | 61.46 | 0.65 | 21.07 | 0.10 | 1.123E-05 |
| 10  | med_area_home <19.574 (p62) &prop_shrubland <0.100 (p56)                                       | rate_local3 >0.371 (p57) | 56.70 | 0.68 | 20.89 | 0.13 | 3.136E-05 |
| 11  | prop_preprim_edu <0.141 (p86) &prop_higher_edu <0.211 (p54) &med_area_home <19.828 (p65)       | rate_local3 >0.342 (p54) | 53.92 | 0.75 | 20.86 | 0.08 | 8.18E-05  |
| 12  | prop_higher_edu <0.220 (p57) &med_area_home <15.420 (p45) &build_area_pp <140.600 (p81)        | rate_local3 >0.292 (p50) | 58.24 | 0.81 | 20.85 | 0.05 | 4.64E-05  |
| 13  | prop_preprim_edu <0.147 (p89) &med_income <19861.505 (p65) &POI_pp_transport <57.236 (p76)     | rate_local3 >0.248 (p42) | 81.95 | 0.76 | 20.75 | 0.04 | 8.268E-05 |
| 14  | med_income <16768.973 (p51) &den_population >15303.757 (p47)                                   | rate_local3 >0.325 (p52) | 54.81 | 0.76 | 20.73 | 0.13 | 4.975E-07 |
| 15  | prop_preprim_edu <0.147 (p89) &med_income <19861.505 (p65) &POI_pp_edu <19.291 (p73)           | rate_local3 >0.248 (p42) | 80.00 | 0.77 | 20.68 | 0.04 | 3.734E-05 |
| 16  | prop_preprim_edu <0.136 (p85) &prop_higher_edu <0.228 (p61) &POI_pp_transport <47.707 (p69)    | rate_local3 >0.237 (p40) | 68.15 | 0.84 | 20.57 | 0.07 | 3.119E-05 |
| 17  | med_income <25645.373 (p81) &den_bldg >0.109 (p36)                                             | rate_local3 >0.371 (p57) | 67.02 | 0.62 | 20.42 | 0.12 | 5.626E-06 |
| 18  | med_area_home <19.574 (p62) &den_road >8.244 (p39)                                             | rate_local3 >0.371 (p57) | 61.81 | 0.64 | 20.33 | 0.09 | 5.469E-05 |
| 19  | med_area_home <19.574 (p62) &den_bldg >0.109 (p36)                                             | rate_local3 >0.371 (p57) | 63.25 | 0.63 | 20.33 | 0.08 | 2.446E-05 |
| 20  | prop_higher_edu <0.226 (p60) &den_population >15303.757 (p47)                                  | rate_local3 >0.335 (p53) | 52.12 | 0.76 | 20.24 | 0.18 | 4.066E-07 |
| 21  | med_income <23040.421 (p78) &prop_agricultural <0.028 (p72)                                    | rate_local3 >0.335 (p53) | 72.65 | 0.64 | 20.12 | 0.09 | 5.813E-05 |
| 22  | prop_higher_edu <0.224 (p58) &med_area_home <15.648 (p45)                                      | rate_local3 >0.336 (p54) | 56.92 | 0.72 | 20.03 | 0.08 | 4.471E-05 |
| 23  | prop_preprim_edu <0.142 (p87) &prop_higher_edu <0.223 (p58) &POI_pp_mall_mkt <10.971 (p75)     | rate_local3 >0.243 (p41) | 69.14 | 0.81 | 19.96 | 0.06 | 2.424E-07 |

|    |                                                                                                  |                          |       |      |       |      |           |
|----|--------------------------------------------------------------------------------------------------|--------------------------|-------|------|-------|------|-----------|
| 24 | med_area_home <19.516 (p61) &den_population >15303.757 (p47)                                     | rate_local3 >0.325 (p52) | 65.23 | 0.68 | 19.95 | 0.09 | 6.13E-05  |
| 25 | prop_higher_edu <0.230 (p61) &prop_agricultural <0.024 (p71)<br>&POI_pp_mall_mkt <11.049 (p75)   | rate_local3 >0.272 (p47) | 58.36 | 0.82 | 19.93 | 0.06 | 7.567E-05 |
| 26 | prop_preprim_edu <0.141 (p86) &prop_higher_edu <0.219 (p56)<br>&build_area_pp <79.707 (p56)      | rate_local3 >0.279 (p48) | 56.94 | 0.81 | 19.91 | 0.06 | 2.493E-05 |
| 27 | prop_higher_edu <0.286 (p73) &prop_shrubland <0.107 (p57)                                        | rate_local3 >0.365 (p56) | 56.42 | 0.67 | 19.86 | 0.14 | 1.708E-05 |
| 28 | prop_higher_edu <0.230 (p61) &prop_transport >0.101 (p43)                                        | rate_local3 >0.373 (p57) | 48.63 | 0.72 | 19.79 | 0.19 | 7.686E-07 |
| 29 | prop_higher_edu <0.223 (p58) &med_area_home <16.151 (p47)<br>&POI_pp_sports <33.215 (p70)        | rate_local3 >0.243 (p41) | 61.23 | 0.85 | 19.70 | 0.06 | 6.768E-05 |
| 30 | prop_preprim_edu <0.141 (p86) &med_income <16682.171 (p51)                                       | rate_local3 >0.282 (p49) | 65.86 | 0.75 | 19.57 | 0.08 | 5.409E-05 |
| 31 | prop_preprim_edu <0.141 (p86) &med_area_home <19.828 (p65)                                       | rate_local3 >0.249 (p43) | 89.09 | 0.73 | 19.56 | 0.05 | 1.799E-05 |
| 32 | prop_preprim_edu <0.152 (p91) &med_income <18928.552 (p62)<br>&POI_pp_mall_mkt <11.049 (p75)     | rate_local3 >0.177 (p33) | 85.95 | 0.87 | 19.55 | 0.06 | 3.991E-06 |
| 33 | prop_higher_edu <0.229 (p61) &build_area_pp <110.047 (p72)<br>&prop_shrubland <0.214 (p82)       | rate_local3 >0.231 (p39) | 67.64 | 0.83 | 19.48 | 0.07 | 5.576E-05 |
| 34 | prop_preprim_edu <0.145 (p89) &med_income <18958.166 (p62)<br>&POI_pp_telecom_elec <19.083 (p67) | rate_local3 >0.193 (p35) | 79.18 | 0.86 | 19.47 | 0.04 | 4.028E-05 |
| 35 | prop_higher_edu <0.224 (p58) &prop_agricultural <0.025 (p71)<br>&POI_pp_transport <47.989 (p69)  | rate_local3 >0.330 (p52) | 50.17 | 0.77 | 19.41 | 0.07 | 5.417E-05 |
| 36 | prop_higher_edu <0.227 (p60) &build_area_pp <64.139 (p51)                                        | rate_local3 >0.314 (p52) | 56.43 | 0.74 | 19.37 | 0.12 | 3.369E-05 |
| 37 | prop_higher_edu <0.249 (p64) &den_road >9.024 (p43)                                              | rate_local3 >0.349 (p55) | 50.61 | 0.73 | 19.32 | 0.18 | 4.782E-06 |
| 38 | prop_preprim_edu <0.128 (p82) &prop_higher_edu <0.223 (p58)<br>&POI_pp_sports <33.215 (p70)      | rate_local3 >0.243 (p41) | 63.66 | 0.83 | 19.32 | 0.07 | 2.923E-05 |
| 39 | prop_higher_edu <0.230 (p61) &prop_agricultural <0.024 (p71)                                     | rate_local3 >0.335 (p53) | 57.60 | 0.70 | 19.22 | 0.12 | 4.05E-05  |
| 40 | prop_preprim_edu <0.146 (p89) &med_income <17876.257 (p56)<br>&POI_pp_sports <35.406 (p73)       | rate_local3 >0.213 (p37) | 73.44 | 0.84 | 19.19 | 0.05 | 2.41E-05  |
| 41 | prop_over65 >0.140 (p35) &prop_preprim_edu <0.130 (p83)<br>&POI_pp_edu <21.935 (p79)             | rate_local3 >0.232 (p39) | 71.95 | 0.80 | 19.01 | 0.07 | 3.787E-05 |
| 42 | gender_ratio <103.139 (p89) &med_income <18928.552 (p62)<br>&POI_pp_mall_mkt <11.049 (p75)       | rate_local3 >0.212 (p37) | 83.49 | 0.80 | 18.91 | 0.03 | 6.313E-05 |
| 43 | prop_preprim_edu <0.138 (p85) &prop_higher_edu <0.229 (p61)<br>&POI_pp_edu <20.842 (p78)         | rate_local3 >0.237 (p40) | 68.67 | 0.81 | 18.80 | 0.05 | 3.264E-05 |
| 44 | gender_ratio <103.298 (p89) &prop_higher_edu <0.220 (p57)<br>&build_area_pp <140.600 (p81)       | rate_local3 >0.245 (p42) | 74.13 | 0.77 | 18.71 | 0.04 | 4.62E-05  |
| 45 | prop_higher_edu <0.229 (p61) &den_bldg >0.109 (p36)                                              | rate_local3 >0.348 (p55) | 53.95 | 0.69 | 18.70 | 0.13 | 4.571E-05 |

|    |                                                                                                  |                          |       |      |       |      |           |
|----|--------------------------------------------------------------------------------------------------|--------------------------|-------|------|-------|------|-----------|
| 46 | prop_over65 >0.131 (p27) &prop_preprim_edu <0.127 (p82)<br>&prop_higher_edu <0.342 (p81)         | rate_local3 >0.231 (p39) | 77.77 | 0.78 | 18.64 | 0.07 | 3.768E-05 |
| 47 | gender_ratio <103.088 (p89) &med_income <17032.612 (p53)<br>&POI_pp_telecom_elec <22.637 (p72)   | rate_local3 >0.209 (p36) | 74.44 | 0.84 | 18.59 | 0.03 | 5.347E-05 |
| 48 | gender_ratio <104.750 (p89) &prop_higher_edu <0.246 (p64)<br>&POI_pp_telecom_elec <19.940 (p68)  | rate_local3 >0.183 (p33) | 83.18 | 0.85 | 18.53 | 0.03 | 5.575E-05 |
| 49 | prop_preprim_edu <0.130 (p82) &med_area_home <18.519 (p56)<br>&POI_pp_telecom_elec <19.940 (p68) | rate_local3 >0.183 (p33) | 79.23 | 0.87 | 18.51 | 0.04 | 2.659E-05 |
| 50 | prop_over65 >0.141 (p36) &prop_preprim_edu <0.127 (p82)<br>&POI_pp_telecom_elec <22.172 (p72)    | rate_local3 >0.229 (p39) | 69.42 | 0.81 | 18.49 | 0.06 | 1.946E-05 |
| 51 | med_income <25547.911 (p81) &prop_grassland <0.042 (p60)                                         | rate_local3 >0.374 (p57) | 60.37 | 0.61 | 18.44 | 0.11 | 6.293E-05 |
| 52 | gender_ratio <103.088 (p89) &med_income <17032.612 (p53)<br>&POI_pp_transport <45.672 (p69)      | rate_local3 >0.222 (p38) | 69.45 | 0.83 | 18.42 | 0.03 | 4.377E-05 |
| 53 | prop_over65 >0.140 (p35) &prop_preprim_edu <0.134 (p84)<br>&POI_pp_transport <51.240 (p72)       | rate_local3 >0.232 (p39) | 69.61 | 0.81 | 18.40 | 0.07 | 3.712E-05 |
| 54 | med_income <16608.038 (p51) &build_area_pp <69.587 (p52)                                         | rate_local3 >0.291 (p50) | 54.70 | 0.77 | 18.38 | 0.11 | 8.044E-05 |
| 55 | prop_preprim_edu <0.152 (p91) &med_area_home <18.819 (p57)<br>&POI_pp_mall_mkt <11.049 (p75)     | rate_local3 >0.176 (p33) | 84.04 | 0.86 | 18.32 | 0.04 | 4.332E-05 |
| 56 | prop_preprim_edu <0.136 (p85) &med_area_home <18.935 (p58)<br>&POI_pp_edu <20.842 (p78)          | rate_local3 >0.193 (p35) | 79.68 | 0.84 | 18.31 | 0.03 | 2.625E-05 |
| 57 | med_income <17081.439 (p53) &prop_open_recreation >0.026 (p45)                                   | rate_local3 >0.352 (p56) | 49.42 | 0.71 | 18.23 | 0.11 | 1.034E-05 |
| 58 | gender_ratio <104.715 (p89) &med_income <17876.257 (p56)<br>&POI_pp_sports <35.406 (p73)         | rate_local3 >0.213 (p37) | 76.57 | 0.81 | 18.15 | 0.03 | 6.524E-05 |
| 59 | med_income <25469.001 (p81) &prop_woodland <0.212 (p68)                                          | rate_local3 >0.375 (p57) | 68.42 | 0.58 | 18.00 | 0.07 | 6.138E-05 |
| 60 | med_income <19165.125 (p63) &POI_pp_telecom_elec <21.733 (p71)                                   | rate_local3 >0.193 (p35) | 88.51 | 0.81 | 17.80 | 0.08 | 5.322E-06 |
| 61 | med_area_home <18.519 (p56) &prop_grassland <0.072 (p69)                                         | rate_local3 >0.343 (p54) | 59.44 | 0.65 | 17.78 | 0.07 | 7.172E-05 |
| 62 | gender_ratio <104.750 (p89) &med_area_home <18.519 (p56)<br>&POI_pp_telecom_elec <19.940 (p68)   | rate_local3 >0.183 (p33) | 83.94 | 0.84 | 17.74 | 0.02 | 4.582E-05 |
| 63 | gender_ratio <103.088 (p89) &med_income <17032.612 (p53)<br>&POI_pp_edu <17.348 (p70)            | rate_local3 >0.207 (p36) | 70.23 | 0.84 | 17.66 | 0.04 | 5.708E-05 |
| 64 | med_income <16756.602 (p51) &med_area_home <15.534 (p45)<br>&build_area_pp <92.916 (p63)         | rate_local3 >0.227 (p38) | 59.47 | 0.85 | 17.60 | 0.05 | 8.176E-05 |
| 65 | prop_preprim_edu <0.141 (p86) &prop_higher_edu <0.215 (p56)                                      | rate_local3 >0.279 (p48) | 65.93 | 0.72 | 17.41 | 0.08 | 6.447E-05 |
| 66 | med_income <19165.125 (p63) &POI_pp_transport <47.707 (p69)                                      | rate_local3 >0.193 (p35) | 87.15 | 0.81 | 17.30 | 0.07 | 1.306E-05 |

|           |                                                                                            |                          |       |      |       |      |           |
|-----------|--------------------------------------------------------------------------------------------|--------------------------|-------|------|-------|------|-----------|
| <b>67</b> | prop_higher_edu <0.222 (p58) &prop_open_recreation >0.026 (p45)                            | rate_local3 >0.334 (p53) | 49.02 | 0.72 | 17.29 | 0.14 | 1.14E-05  |
| <b>68</b> | prop_higher_edu <0.224 (p58) &prop_gov_insti_faci >0.027 (p38)                             | rate_local3 >0.297 (p50) | 54.45 | 0.74 | 17.12 | 0.12 | 6.168E-05 |
| <b>69</b> | med_area_home <15.986 (p47) &build_area_pp <74.856 (p54)                                   | rate_local3 >0.192 (p35) | 69.97 | 0.86 | 16.98 | 0.08 | 4.884E-05 |
| <b>70</b> | prop_over65 >0.141 (p36) &prop_preprim_edu <0.127 (p82)<br>&POI_pp_mall_mkt <11.292 (p75)  | rate_local3 >0.229 (p39) | 65.31 | 0.81 | 16.93 | 0.07 | 3.072E-05 |
| <b>71</b> | med_income <22654.708 (p78) &prop_gov_insti_faci >0.026 (p38)                              | rate_local3 >0.199 (p36) | 82.41 | 0.81 | 16.92 | 0.09 | 6.82E-05  |
| <b>72</b> | med_area_home <13.826 (p27)                                                                | rate_local3 >0.340 (p54) | 43.20 | 0.76 | 16.91 | 0.30 | 1.257E-08 |
| <b>73</b> | med_area_home <19.925 (p65) &prop_gov_insti_faci >0.027 (p38)                              | rate_local3 >0.188 (p34) | 83.83 | 0.82 | 16.89 | 0.07 | 5.142E-05 |
| <b>74</b> | gender_ratio <102.576 (p88) &med_area_home <20.274 (p67)<br>&POI_pp_edu <17.820 (p71)      | rate_local3 >0.172 (p31) | 89.18 | 0.84 | 16.82 | 0.03 | 4.33E-05  |
| <b>75</b> | med_income <15406.084 (p39)                                                                | rate_local3 >0.335 (p53) | 57.08 | 0.66 | 16.75 | 0.19 | 1.492E-06 |
| <b>76</b> | prop_higher_edu <0.228 (p61) &POI_pp_transport <47.707 (p69)                               | rate_local3 >0.193 (p35) | 80.16 | 0.82 | 16.56 | 0.09 | 1.747E-05 |
| <b>77</b> | gender_ratio <100.809 (p84) &prop_higher_edu <0.249 (p64)<br>&POI_pp_sports <28.870 (p66)  | rate_local3 >0.174 (p32) | 77.27 | 0.86 | 16.55 | 0.04 | 5.409E-05 |
| <b>78</b> | prop_preprim_edu <0.153 (p91) &med_area_home <16.836 (p50)<br>&POI_pp_sports <29.915 (p67) | rate_local3 >0.165 (p29) | 75.35 | 0.88 | 16.53 | 0.03 | 7.482E-05 |
| <b>79</b> | med_area_home <15.159 (p43) &POI_pp_transport <51.240 (p72)                                | rate_local3 >0.236 (p40) | 62.92 | 0.80 | 16.49 | 0.06 | 6.56E-05  |
| <b>80</b> | ave_household_size <2.962 (p63) &prop_shrubland <0.134 (p64)                               | rate_local3 >0.452 (p64) | 50.06 | 0.53 | 16.42 | 0.09 | 8.294E-05 |
| <b>81</b> | prop_over65 >0.141 (p36) &prop_preprim_edu <0.127 (p82)<br>&POI_pp_sports <31.916 (p69)    | rate_local3 >0.229 (p39) | 61.99 | 0.81 | 16.31 | 0.07 | 3.072E-05 |
| <b>82</b> | med_area_home <15.038 (p43) &POI_pp_telecom_elec <20.031 (p68)                             | rate_local3 >0.214 (p37) | 65.46 | 0.82 | 16.28 | 0.06 | 1.97E-05  |
| <b>83</b> | med_area_home <15.648 (p45) &POI_pp_edu <20.907 (p78)                                      | rate_local3 >0.193 (p35) | 72.17 | 0.84 | 16.25 | 0.05 | 5.236E-05 |
| <b>84</b> | prop_higher_edu <0.222 (p58) &POI_pp_sports <12.643 (p42)                                  | rate_local3 >0.277 (p47) | 49.14 | 0.79 | 16.23 | 0.13 | 7.736E-05 |
| <b>85</b> | prop_higher_edu <0.224 (p58) &prop_agricultural <0.023 (p70)<br>&POI_pp_edu <21.158 (p78)  | rate_local3 >0.239 (p41) | 54.93 | 0.83 | 16.17 | 0.05 | 6.419E-05 |
| <b>86</b> | gender_ratio <104.715 (p89) &med_income <17876.257 (p56)                                   | rate_local3 >0.223 (p38) | 85.92 | 0.74 | 16.07 | 0.03 | 6.418E-05 |
| <b>87</b> | prop_preprim_edu <0.140 (p86) &POI_pp_transport <21.248 (p43)                              | rate_local3 >0.182 (p33) | 74.09 | 0.85 | 16.06 | 0.03 | 3.366E-05 |
| <b>88</b> | prop_over65 >0.141 (p36) &POI_pp_telecom_elec <22.172 (p72)                                | rate_local3 >0.256 (p44) | 73.69 | 0.72 | 16.04 | 0.08 | 3.485E-05 |
| <b>89</b> | gender_ratio <103.391 (p89) &med_area_home <17.921 (p55)<br>&POI_pp_mall_mkt <13.167 (p81) | rate_local3 >0.150 (p27) | 85.93 | 0.87 | 15.93 | 0.02 | 7.275E-05 |
| <b>90</b> | build_area_pp <61.517 (p50) &POI_pp_mall_mkt <13.124 (p81)                                 | rate_local3 >0.177 (p33) | 81.49 | 0.84 | 15.88 | 0.02 | 8.324E-06 |
| <b>91</b> | med_income <19861.505 (p65) &POI_pp_edu <19.291 (p73)                                      | rate_local3 >0.180 (p33) | 94.43 | 0.80 | 15.87 | 0.06 | 2.841E-05 |
| <b>92</b> | ave_household_size <2.900 (p49) &den_bldg >0.126 (p40)                                     | rate_local3 >0.408 (p59) | 48.67 | 0.58 | 15.72 | 0.09 | 3.968E-05 |

|            |                                                                                            |                          |        |      |       |      |           |
|------------|--------------------------------------------------------------------------------------------|--------------------------|--------|------|-------|------|-----------|
| <b>93</b>  | prop_over65 >0.120 (p19) &gender_ratio <102.576 (p88) &POI_pp_edu <17.820 (p71)            | rate_local3 >0.172 (p31) | 93.84  | 0.82 | 15.71 | 0.03 | 8.049E-05 |
| <b>94</b>  | ave_household_size <2.900 (p49) &den_road >10.099 (p47)                                    | rate_local3 >0.408 (p59) | 44.42  | 0.61 | 15.70 | 0.12 | 4.951E-05 |
| <b>95</b>  | med_area_home <15.626 (p45) &POI_pp_mall_mkt <13.167 (p81)                                 | rate_local3 >0.188 (p34) | 73.17  | 0.84 | 15.70 | 0.05 | 7.213E-05 |
| <b>96</b>  | prop_household_3gen <0.081 (p92) &med_area_home <16.469 (p49)                              | rate_local3 >0.179 (p33) | 81.22  | 0.83 | 15.69 | 0.04 | 3.328E-06 |
| <b>97</b>  | prop_higher_edu <0.229 (p61) &prop_grassland <0.043 (p60)                                  | rate_local3 >0.311 (p51) | 48.88  | 0.72 | 15.68 | 0.13 | 5.346E-05 |
| <b>98</b>  | gender_ratio <103.076 (p89) &prop_preprim_edu <0.153 (p91) &POI_pp_sports <15.701 (p50)    | rate_local3 >0.142 (p26) | 83.74  | 0.88 | 15.62 | 0.01 | 4.391E-05 |
| <b>99</b>  | prop_higher_edu <0.228 (p61) &POI_pp_mall_mkt <9.663 (p69)                                 | rate_local3 >0.233 (p39) | 75.07  | 0.74 | 15.46 | 0.06 | 4.663E-05 |
| <b>100</b> | prop_preprim_edu <0.126 (p82) &POI_pp_edu <7.095 (p44)                                     | rate_local3 >0.190 (p35) | 68.96  | 0.84 | 15.42 | 0.05 | 3.375E-05 |
| <b>101</b> | gender_ratio <103.088 (p89) &POI_pp_transport <23.063 (p45)                                | rate_local3 >0.137 (p26) | 84.11  | 0.88 | 15.23 | 0.02 | 1.123E-05 |
| <b>102</b> | prop_preprim_edu <0.147 (p90) &POI_pp_telecom_elec <6.955 (p37)                            | rate_local3 >0.193 (p35) | 64.76  | 0.85 | 15.17 | 0.02 | 3.01E-05  |
| <b>103</b> | med_area_home <15.986 (p47) &POI_pp_sports <33.639 (p70)                                   | rate_local3 >0.176 (p33) | 72.35  | 0.85 | 15.15 | 0.06 | 1.022E-05 |
| <b>104</b> | med_income <18723.236 (p62) &prop_rural_set <0.000 (p44) &prop_industrial <0.008 (p69)     | rate_local3 >0.428 (p63) | 29.28  | 0.77 | 15.05 | 0.15 | 6.342E-05 |
| <b>105</b> | prop_over65 >0.140 (p35) &POI_pp_transport <51.240 (p72)                                   | rate_local3 >0.232 (p39) | 76.83  | 0.74 | 15.00 | 0.08 | 6.242E-05 |
| <b>106</b> | prop_preprim_edu <0.140 (p86) &POI_pp_sports <18.293 (p51)                                 | rate_local3 >0.132 (p25) | 88.59  | 0.88 | 14.99 | 0.03 | 7.173E-05 |
| <b>107</b> | prop_higher_edu <0.371 (p86) &POI_pp_telecom_elec <6.955 (p37)                             | rate_local3 >0.193 (p35) | 64.47  | 0.84 | 14.97 | 0.02 | 3.01E-05  |
| <b>108</b> | prop_over65 >0.147 (p39) &prop_preprim_edu =0.092-0.132 (p39-84)                           | rate_local3 >0.245 (p42) | 52.23  | 0.80 | 14.89 | 0.11 | 1.027E-05 |
| <b>109</b> | prop_preprim_edu <0.142 (p87) &med_area_home <13.845 (p27) &POI_pp_transport <55.590 (p74) | rate_local3 >0.231 (p39) | 45.49  | 0.88 | 14.88 | 0.02 | 3.838E-05 |
| <b>110</b> | gender_ratio <102.821 (p88) &POI_pp_edu <18.657 (p73)                                      | rate_local3 >0.127 (p25) | 119.39 | 0.84 | 14.88 | 0.03 | 4.211E-05 |
| <b>111</b> | med_income <18958.166 (p62) &POI_pp_sports <35.685 (p73)                                   | rate_local3 >0.193 (p35) | 81.29  | 0.79 | 14.86 | 0.06 | 6.207E-05 |
| <b>112</b> | prop_preprim_edu =0.097-0.150 (p49-90) &den_population >15303.757 (p47)                    | rate_local3 >0.343 (p54) | 37.23  | 0.76 | 14.82 | 0.15 | 2.737E-06 |
| <b>113</b> | gender_ratio <103.088 (p89) &POI_pp_sports <16.105 (p50)                                   | rate_local3 >0.138 (p26) | 86.02  | 0.87 | 14.76 | 0.02 | 1.346E-05 |
| <b>114</b> | med_area_home <18.502 (p56) &prop_woodland <0.075 (p39)                                    | rate_local3 >0.361 (p56) | 38.79  | 0.70 | 14.65 | 0.13 | 6.515E-05 |
| <b>115</b> | prop_preprim_edu <0.143 (p89) &POI_pp_mall_mkt <7.036 (p60)                                | rate_local3 >0.142 (p26) | 95.53  | 0.85 | 14.62 | 0.04 | 3.793E-05 |
| <b>116</b> | gender_ratio <102.650 (p88) &med_area_home <18.935 (p58)                                   | rate_local3 >0.163 (p29) | 94.86  | 0.82 | 14.49 | 0.03 | 3.809E-05 |
| <b>117</b> | POI_pp_transport <16.809 (p38)                                                             | rate_local3 >0.191 (p35) | 65.98  | 0.84 | 14.48 | 0.18 | 1.673E-07 |
| <b>118</b> | build_area_pp <61.380 (p50)                                                                | rate_local3 >0.222 (p38) | 75.64  | 0.75 | 14.46 | 0.14 | 6.155E-06 |
| <b>119</b> | build_area_pp <77.922 (p56) &prop_grassland <0.070 (p67)                                   | rate_local3 >0.159 (p29) | 74.86  | 0.86 | 14.37 | 0.06 | 1.771E-05 |

|     |                                                                                                    |                          |        |      |       |      |           |
|-----|----------------------------------------------------------------------------------------------------|--------------------------|--------|------|-------|------|-----------|
| 120 | med_income <18357.304 (p61) &POI_pp_mall_mkt <11.049 (p75)                                         | rate_local3 >0.177 (p33) | 85.03  | 0.81 | 14.24 | 0.05 | 5.201E-05 |
| 121 | prop_higher_edu <0.237 (p62)                                                                       | rate_local3 >0.335 (p53) | 75.42  | 0.57 | 14.15 | 0.11 | 7.001E-06 |
| 122 | gender_ratio <98.034 (p78) &POI_pp_mall_mkt <4.803 (p49)                                           | rate_local3 >0.129 (p25) | 78.44  | 0.89 | 14.05 | 0.05 | 6.672E-05 |
| 123 | den_population >21684.808 (p53)                                                                    | rate_local3 >0.267 (p47) | 68.18  | 0.69 | 14.02 | 0.14 | 3.312E-05 |
| 124 | prop_higher_edu <0.244 (p63) &POI_pp_edu <21.332 (p79)                                             | rate_local3 >0.203 (p36) | 84.69  | 0.76 | 14.01 | 0.05 | 8.162E-05 |
| 125 | ave_household_size <2.659 (p29) &prop_transport >0.098 (p43)                                       | rate_local3 >0.475 (p66) | 29.62  | 0.63 | 13.98 | 0.15 | 3.579E-05 |
| 126 | prop_transport >0.141 (p55)                                                                        | rate_local3 >0.382 (p57) | 54.56  | 0.56 | 13.89 | 0.14 | 4.175E-05 |
| 127 | POI_pp_telecom_elec <6.955 (p37)                                                                   | rate_local3 >0.193 (p35) | 65.22  | 0.82 | 13.81 | 0.17 | 2.008E-06 |
| 128 | ave_household_size <2.733 (p37) &den_population >20736.122 (p52)                                   | rate_local3 >0.361 (p56) | 32.65  | 0.76 | 13.71 | 0.18 | 7.586E-05 |
| 129 | gender_ratio <103.088 (p89) &POI_pp_telecom_elec <24.978 (p76)                                     | rate_local3 >0.130 (p25) | 124.27 | 0.82 | 13.65 | 0.02 | 5.276E-05 |
| 130 | prop_higher_edu <0.222 (p58) &prop_open_recreation >0.026 (p45) &POI_pp_telecom_elec <32.319 (p80) | rate_local3 >0.185 (p33) | 55.34  | 0.88 | 13.63 | 0.05 | 5.976E-05 |
| 131 | prop_higher_edu <0.222 (p58) &prop_open_recreation >0.026 (p45) &POI_pp_sports <37.567 (p75)       | rate_local3 >0.185 (p33) | 53.89  | 0.88 | 13.51 | 0.05 | 5.238E-05 |
| 132 | ave_household_size <2.636 (p29) &prop_rural_set <0.001 (p46)                                       | rate_local3 >0.493 (p68) | 25.71  | 0.65 | 13.15 | 0.17 | 5.449E-05 |
| 133 | prop_grassland <0.070 (p67) &POI_pp_telecom_elec <11.261 (p50)                                     | rate_local3 >0.156 (p28) | 64.11  | 0.87 | 12.57 | 0.05 | 7.501E-05 |
| 134 | prop_publicResid >0.063 (p74)                                                                      | rate_local3 >0.295 (p50) | 40.41  | 0.74 | 12.49 | 0.23 | 6.569E-05 |
| 135 | prop_shrubland <0.009 (p30)                                                                        | rate_local3 >0.570 (p76) | 28.29  | 0.43 | 12.25 | 0.19 | 1.275E-05 |
| 136 | prop_woodland <0.012 (p22)                                                                         | rate_local3 >0.409 (p59) | 30.91  | 0.65 | 12.19 | 0.26 | 1.005E-05 |
| 137 | prop_preprim_edu =0.097-0.143 (p51-89)                                                             | rate_local3 >0.313 (p52) | 50.96  | 0.64 | 11.51 | 0.14 | 7.439E-06 |
| 138 | ave_household_size <2.627 (p29) &prop_gov_insti_faci >0.026 (p38)                                  | rate_local3 >0.453 (p64) | 24.61  | 0.65 | 11.34 | 0.15 | 2.563E-05 |
| 139 | prop_grassland <0.000 (p16)                                                                        | rate_local3 >0.500 (p68) | 21.99  | 0.64 | 11.34 | 0.33 | 1.079E-05 |
| 140 | den_road >9.024 (p43)                                                                              | rate_local3 >0.407 (p59) | 59.85  | 0.49 | 11.28 | 0.09 | 5.277E-05 |
| 141 | prop_preprim_edu <0.126 (p82) &POI_pp_sports <22.459 (p57) &POI_pp_telecom_elec <4.154 (p22)       | rate_local3 >0.192 (p35) | 39.39  | 0.89 | 10.70 | 0.02 | 3.007E-05 |
| 142 | prop_preprim_edu <0.126 (p82) &POI_pp_telecom_elec <4.154 (p22) &POI_pp_mall_mkt <10.155 (p71)     | rate_local3 >0.192 (p35) | 39.39  | 0.89 | 10.70 | 0.02 | 2.927E-05 |
| 143 | prop_preprim_edu <0.126 (p82) &POI_pp_edu <23.861 (p81) &POI_pp_telecom_elec <4.154 (p22)          | rate_local3 >0.192 (p35) | 39.39  | 0.89 | 10.70 | 0.02 | 2.474E-05 |
| 144 | prop_preprim_edu <0.126 (p82) &POI_pp_telecom_elec <4.154 (p22) &POI_pp_transport <80.155 (p83)    | rate_local3 >0.192 (p35) | 39.39  | 0.89 | 10.70 | 0.02 | 1.321E-05 |
| 145 | prop_over65 >0.141 (p36)                                                                           | rate_local3 >0.274 (p47) | 85.51  | 0.61 | 10.65 | 0.08 | 8.153E-05 |

|     |                                                                                         |                                   |       |      |       |      |           |
|-----|-----------------------------------------------------------------------------------------|-----------------------------------|-------|------|-------|------|-----------|
| 146 | den_bldg >0.136 (p43)                                                                   | rate_local3 >0.411 (p59)          | 59.27 | 0.47 | 10.35 | 0.08 | 8.318E-05 |
| 147 | prop_preprim_edu <0.142 (p86) &ave_household_size <2.615 (p29)                          | rate_local3 >0.453 (p64)          | 25.52 | 0.59 | 10.28 | 0.07 | 6.777E-05 |
| 148 | prop_higher_edu <0.212 (p54) &prop_private_resid >0.104 (p66)                           | rate_local3 >0.372 (p57)          | 17.56 | 0.94 | 9.55  | 0.39 | 3.173E-05 |
| 149 | ave_household_size <2.580 (p17)                                                         | rate_local3 >0.621 (p79)          | 18.74 | 0.43 | 9.54  | 0.22 | 2.656E-05 |
| 150 | prop_business >0.039 (p84)                                                              | rate_local3 >0.518 (p71)          | 19.10 | 0.54 | 8.80  | 0.25 | 2.866E-05 |
| 151 | POI_pp_mall_mkt <2.023 (p22)                                                            | rate_local3 =0.193-0.721 (p35-85) | 39.01 | 0.80 | 15.66 | 0.32 | 5.067E-08 |
| 152 | POI_pp_edu <4.431 (p27)                                                                 | rate_local3 =0.197-0.692 (p36-83) | 41.95 | 0.72 | 14.71 | 0.25 | 1.587E-08 |
| 153 | POI_pp_sports <5.899 (p20)                                                              | rate_local3 =0.184-0.660 (p33-80) | 34.14 | 0.80 | 14.59 | 0.34 | 7.999E-08 |
| 154 | prop_higher_edu >0.228 (p61) &POI_pp_transport <47.707 (p69)                            | rate_local3 =0.043-0.193 (p16-35) | 21.31 | 0.43 | 12.16 | 0.14 | 2.852E-05 |
| 155 | med_income >19165.125 (p63) &POI_pp_telecom_elec <21.733 (p71)                          | rate_local3 =0.043-0.193 (p16-35) | 19.20 | 0.45 | 11.25 | 0.14 | 6.091E-06 |
| 156 | med_income >19165.125 (p63) &POI_pp_transport <47.707 (p69)                             | rate_local3 =0.043-0.193 (p16-35) | 17.83 | 0.45 | 10.53 | 0.15 | 1.161E-05 |
| 157 | med_income >18958.166 (p62) &POI_pp_sports <35.685 (p73)                                | rate_local3 =0.043-0.193 (p16-35) | 17.69 | 0.39 | 9.24  | 0.09 | 1.777E-05 |
| 158 | med_area_home >15.986 (p47) &POI_pp_sports <33.639 (p70)                                | rate_local3 =0.030-0.176 (p16-33) | 20.05 | 0.30 | 9.16  | 0.10 | 5.818E-05 |
| 159 | POI_pp_telecom_elec =6.955-20.167 (p37-68)                                              | rate_local3 =0.043-0.193 (p16-35) | 20.75 | 0.32 | 8.72  | 0.13 | 5.217E-06 |
| 160 | POI_pp_transport =16.809-55.037 (p38-74)                                                | rate_local3 =0.041-0.191 (p16-35) | 21.80 | 0.29 | 7.99  | 0.11 | 3.919E-07 |
| 161 | prop_higher_edu >0.371 (p86) &POI_pp_telecom_elec =6.955-20.167 (p37-68)                | rate_local3 =0.043-0.193 (p16-35) | 7.89  | 0.78 | 6.01  | 0.37 | 6.132E-05 |
| 162 | prop_publicResid <0.028 (p66) &prop_transport <0.226 (p69)                              | rate_local3 <0.354 (p56)          | 74.65 | 0.75 | 19.20 | 0.10 | 2.527E-05 |
| 163 | prop_publicResid <0.024 (p66) &prop_woodland >0.072 (p38)                               | rate_local3 <0.329 (p52)          | 62.51 | 0.75 | 18.13 | 0.13 | 6.149E-05 |
| 164 | prop_publicResid <0.027 (p66) &prop_business <0.041 (p85)                               | rate_local3 <0.345 (p55)          | 79.04 | 0.71 | 18.13 | 0.07 | 7.714E-05 |
| 165 | prop_higher_edu >0.225 (p58) &prop_business <0.041 (p85)                                | rate_local3 <0.350 (p55)          | 54.07 | 0.81 | 17.14 | 0.09 | 7.998E-05 |
| 166 | prop_higher_edu >0.226 (p60) &ave_household_size >2.484 (p11)                           | rate_local3 <0.328 (p52)          | 55.85 | 0.77 | 17.10 | 0.07 | 7.254E-05 |
| 167 | prop_higher_edu >0.191 (p45) &prop_woodland >0.066 (p36)                                | rate_local3 <0.382 (p57)          | 57.52 | 0.82 | 16.56 | 0.13 | 4.994E-06 |
| 168 | den_public_trans <38.548 (p72) &prop_publicResid <0.031 (p67)                           | rate_local3 <0.395 (p58)          | 78.64 | 0.75 | 16.45 | 0.08 | 5.161E-05 |
| 169 | POI_pp_telecom_elec >20.167 (p68)                                                       | rate_local3 <0.043 (p16)          | 26.96 | 0.39 | 15.56 | 0.22 | 2.922E-10 |
| 170 | med_area_home >19.838 (p65)                                                             | rate_local3 <0.340 (p54)          | 56.62 | 0.75 | 15.50 | 0.20 | 5.078E-08 |
| 171 | prop_preprim_edu <0.126 (p82) &prop_higher_edu >0.215 (p55) &prop_woodland >0.102 (p50) | rate_local3 <0.395 (p58)          | 42.76 | 0.90 | 14.52 | 0.03 | 7.042E-05 |
| 172 | prop_gov_insti_faci <0.023 (p33)                                                        | rate_local3 <0.010 (p15)          | 26.01 | 0.36 | 14.42 | 0.20 | 5.041E-09 |
| 173 | build_area_pp >61.380 (p50)                                                             | rate_local3 <0.222 (p38)          | 58.89 | 0.52 | 14.37 | 0.13 | 6.155E-06 |
| 174 | den_population <21684.808 (p53)                                                         | rate_local3 <0.267 (p47)          | 66.24 | 0.58 | 14.34 | 0.13 | 3.312E-05 |
| 175 | den_public_trans <4.083 (p28)                                                           | rate_local3 <0.016 (p15)          | 23.50 | 0.40 | 14.24 | 0.24 | 9.331E-10 |
| 176 | POI_pp_transport >55.037 (p74)                                                          | rate_local3 <0.041 (p16)          | 23.91 | 0.40 | 14.13 | 0.24 | 2.208E-10 |
| 177 | med_income >24009.220 (p79)                                                             | rate_local3 <0.335 (p53)          | 38.57 | 0.84 | 13.99 | 0.31 | 3.4E-07   |
| 178 | prop_higher_edu >0.237 (p62)                                                            | rate_local3 <0.335 (p53)          | 58.31 | 0.71 | 13.93 | 0.17 | 7.001E-06 |

|     |                                                                        |                          |        |      |       |      |           |
|-----|------------------------------------------------------------------------|--------------------------|--------|------|-------|------|-----------|
| 179 | prop_transport <0.141 (p55)                                            | rate_local3 <0.382 (p57) | 81.67  | 0.70 | 13.79 | 0.12 | 4.175E-05 |
| 180 | POI_pp_sports >45.148 (p80)                                            | rate_local3 <0.007 (p15) | 19.72  | 0.47 | 13.04 | 0.31 | 3.503E-10 |
| 181 | POI_pp_edu >22.794 (p81)                                               | rate_local3 <0.015 (p15) | 20.34  | 0.41 | 12.49 | 0.25 | 1.476E-10 |
| 182 | prop_publicResid <0.063 (p74)                                          | rate_local3 <0.295 (p50) | 90.45  | 0.57 | 12.43 | 0.08 | 6.569E-05 |
| 183 | den_road <9.024 (p43)                                                  | rate_local3 <0.407 (p59) | 66.36  | 0.73 | 11.35 | 0.12 | 5.277E-05 |
| 184 | prop_grassland >0.056 (p63) & POI_pp_edu >13.709 (p61)                 | rate_local3 <0.003 (p15) | 16.47  | 0.51 | 11.30 | 0.20 | 3.968E-05 |
| 185 | POI_pp_mall_mkt >13.520 (p82)                                          | rate_local3 <0.028 (p16) | 18.26  | 0.42 | 11.30 | 0.26 | 1.201E-08 |
| 186 | prop_over65 <0.141 (p36)                                               | rate_local3 <0.274 (p47) | 44.95  | 0.61 | 10.53 | 0.14 | 8.153E-05 |
| 187 | prop_woodland >0.322 (p82)                                             | rate_local3 <0.409 (p59) | 34.03  | 0.87 | 10.45 | 0.27 | 3.918E-05 |
| 188 | den_bldg <0.136 (p43)                                                  | rate_local3 <0.411 (p59) | 64.66  | 0.72 | 10.38 | 0.12 | 8.318E-05 |
| 189 | prop_private_resid <0.021 (p36)                                        | rate_local3 <0.041 (p16) | 22.79  | 0.30 | 10.35 | 0.14 | 4.461E-05 |
| 190 | ave_household_size >2.925 (p63)                                        | rate_local3 <0.621 (p79) | 78.93  | 0.91 | 9.95  | 0.11 | 8.125E-05 |
| 191 | prop_shrubland >0.281 (p89)                                            | rate_local3 <0.166 (p30) | 16.40  | 0.71 | 9.31  | 0.40 | 1.539E-06 |
| 192 | prop_business <0.039 (p84)                                             | rate_local3 <0.518 (p71) | 135.32 | 0.76 | 8.74  | 0.05 | 2.866E-05 |
| 193 | prop_open_recreation <0.002 (p14)                                      | rate_local3 <0.016 (p15) | 13.07  | 0.44 | 8.31  | 0.28 | 9.219E-06 |
| 194 | prop_preprim_edu >0.143 (p89)                                          | rate_local3 <0.027 (p16) | 12.07  | 0.45 | 7.72  | 0.29 | 8.83E-07  |
| 195 | prop_private_resid >0.093 (p65) & prop_transport =0.062-0.249 (p35-73) | rate_local3 <0.293 (p50) | 23.94  | 0.70 | 7.00  | 0.20 | 6.679E-05 |
| 196 | prop_household_3gen >0.083 (p93)                                       | rate_local3 <0.011 (p15) | 9.00   | 0.56 | 6.44  | 0.40 | 4.402E-06 |



**(d) Rules for wave-3 local case rate; POI accessibility was used**

| No. | Antecedent                                                                                   | Consequent               | Supp  | Conf | Lev   | Imp  | P         |
|-----|----------------------------------------------------------------------------------------------|--------------------------|-------|------|-------|------|-----------|
| 1   | med_income <28651.117 (p84) &prop_grassland <0.020 (p46) &LU_entropy <0.553 (p49)            | rate_local4 >0.837 (p79) | 30.96 | 0.73 | 21.91 | 0.17 | 1.556E-06 |
| 2   | med_income <23276.405 (p78) &den_road >7.322 (p35) &LU_entropy <0.551 (p49)                  | rate_local4 >0.804 (p78) | 31.43 | 0.75 | 21.83 | 0.20 | 7.632E-07 |
| 3   | med_income <23241.294 (p78) &prop_transport >0.066 (p35) &LU_entropy <0.553 (p49)            | rate_local4 >0.815 (p78) | 30.79 | 0.74 | 21.48 | 0.20 | 1.333E-06 |
| 4   | med_income <23276.405 (p78) &den_bldg >0.121 (p39) &LU_entropy <0.551 (p49)                  | rate_local4 >0.804 (p78) | 30.77 | 0.75 | 21.30 | 0.20 | 1.333E-06 |
| 5   | med_income <23810.093 (p79) &prop_shrubland <0.014 (p34) &LU_entropy <0.551 (p49)            | rate_local4 >0.804 (p78) | 29.68 | 0.80 | 21.09 | 0.17 | 2.784E-06 |
| 6   | med_income <23241.294 (p78) &prop_rural_set <0.002 (p49) &LU_entropy <0.553 (p49)            | rate_local4 >0.815 (p78) | 30.26 | 0.72 | 20.80 | 0.19 | 4.613E-06 |
| 7   | med_area_home <19.307 (p61) &prop_grassland <0.023 (p48) &LU_entropy <0.551 (p49)            | rate_local4 >0.804 (p78) | 29.07 | 0.79 | 20.64 | 0.22 | 1.023E-05 |
| 8   | med_income <23017.503 (p78) &prop_agricultural <0.009 (p58) &LU_entropy <0.551 (p49)         | rate_local4 >0.827 (p79) | 30.47 | 0.67 | 20.56 | 0.19 | 1.391E-06 |
| 9   | ave_household_size <2.976 (p63) &prop_grassland <0.011 (p36) &LU_entropy <0.556 (p50)        | rate_local4 >0.821 (p79) | 29.60 | 0.73 | 20.54 | 0.14 | 3.422E-05 |
| 10  | med_income <23372.096 (p78) &prop_woodland <0.065 (p36) &LU_entropy <0.551 (p49)             | rate_local4 >0.814 (p78) | 29.35 | 0.74 | 20.40 | 0.14 | 9.908E-06 |
| 11  | den_road >10.434 (p49) &LU_entropy <0.551 (p49)                                              | rate_local4 >0.788 (p77) | 34.18 | 0.59 | 20.35 | 0.21 | 1.835E-07 |
| 12  | den_bldg >0.158 (p47) &LU_entropy <0.551 (p49)                                               | rate_local4 >0.788 (p77) | 34.55 | 0.58 | 20.27 | 0.20 | 4.824E-07 |
| 13  | den_population >19314.432 (p51) &prop_agricultural <0.012 (p60) &prop_shrubland <0.106 (p57) | rate_local4 >0.524 (p55) | 55.05 | 0.73 | 20.27 | 0.05 | 7.448E-05 |
| 14  | ave_household_size <2.976 (p63) &prop_agricultural <0.013 (p61) &LU_entropy <0.552 (p49)     | rate_local4 >0.784 (p76) | 32.73 | 0.63 | 20.21 | 0.13 | 4.611E-05 |
| 15  | med_income <29532.689 (p84) &prop_grassland <0.007 (p31)                                     | rate_local4 >0.852 (p80) | 30.41 | 0.62 | 20.17 | 0.13 | 4.521E-05 |
| 16  | prop_shrubland <0.018 (p36) &LU_entropy <0.543 (p46)                                         | rate_local4 >0.784 (p76) | 32.37 | 0.64 | 20.15 | 0.18 | 3.677E-07 |
| 17  | prop_rural_set <0.026 (p66) &prop_shrubland <0.112 (p58)                                     | rate_local4 >0.564 (p60) | 58.38 | 0.64 | 20.10 | 0.10 | 6.15E-05  |
| 18  | prop_rural_set <0.002 (p50) &LU_entropy <0.551 (p49)                                         | rate_local4 >0.788 (p77) | 35.56 | 0.54 | 19.91 | 0.17 | 5.059E-07 |
| 19  | den_population >18056.735 (p50) &prop_shrubland <0.117 (p59)                                 | rate_local4 >0.510 (p53) | 62.02 | 0.70 | 19.88 | 0.08 | 3.985E-05 |
| 20  | med_area_home <19.307 (p61) &den_bldg >0.158 (p47) &LU_entropy <0.551 (p49)                  | rate_local4 >0.804 (p78) | 28.45 | 0.76 | 19.77 | 0.19 | 3.194E-05 |
| 21  | den_population >18562.555 (p50) &prop_agricultural <0.010 (p59)                              | rate_local4 >0.481 (p49) | 65.43 | 0.72 | 19.74 | 0.07 | 2.749E-05 |

|    |                                                                                          |                          |       |      |       |      |           |
|----|------------------------------------------------------------------------------------------|--------------------------|-------|------|-------|------|-----------|
| 22 | med_income <29357.618 (p84) &den_road >11.996 (p56) &prop_agricultural <0.021 (p69)      | rate_local4 >0.427 (p42) | 59.56 | 0.85 | 19.69 | 0.04 | 5.566E-05 |
| 23 | med_area_home <18.664 (p56) &den_road >7.251 (p34) &LU_entropy <0.551 (p49)              | rate_local4 >0.792 (p77) | 28.64 | 0.76 | 19.68 | 0.18 | 2.645E-05 |
| 24 | prop_transport >0.106 (p44) &prop_agricultural <0.013 (p61)                              | rate_local4 >0.417 (p42) | 77.13 | 0.77 | 19.60 | 0.06 | 1.139E-05 |
| 25 | med_area_home <18.225 (p55) &prop_shrubland <0.141 (p66) &LU_entropy <0.551 (p49)        | rate_local4 >0.796 (p77) | 27.68 | 0.79 | 19.46 | 0.19 | 2.478E-06 |
| 26 | prop_woodland <0.094 (p45) &LU_entropy <0.541 (p45)                                      | rate_local4 >0.786 (p77) | 31.90 | 0.62 | 19.41 | 0.22 | 1.983E-07 |
| 27 | den_road >16.383 (p71)                                                                   | rate_local4 >0.722 (p72) | 36.83 | 0.60 | 19.40 | 0.31 | 4.628E-12 |
| 28 | med_area_home <18.225 (p55) &prop_transport >0.099 (p43) &LU_entropy <0.551 (p49)        | rate_local4 >0.801 (p78) | 27.59 | 0.78 | 19.32 | 0.18 | 3.759E-05 |
| 29 | med_income <23241.294 (p78) &den_public_trans >19.793 (p54) &LU_entropy <0.553 (p49)     | rate_local4 >0.797 (p77) | 28.24 | 0.74 | 19.30 | 0.15 | 5.69E-05  |
| 30 | den_population >24987.561 (p56) &den_bldg >0.200 (p57)                                   | rate_local4 >0.522 (p54) | 50.05 | 0.75 | 19.30 | 0.10 | 3.24E-05  |
| 31 | med_income <26594.841 (p83) &prop_transport >0.104 (p44) &prop_agricultural <0.013 (p61) | rate_local4 >0.386 (p39) | 67.24 | 0.86 | 19.18 | 0.07 | 5.276E-05 |
| 32 | den_population >18939.324 (p50) &LU_entropy <0.551 (p49)                                 | rate_local4 >0.762 (p74) | 31.52 | 0.64 | 18.95 | 0.25 | 2.438E-08 |
| 33 | prop_agricultural <0.003 (p48) &LU_entropy <0.551 (p49)                                  | rate_local4 >0.804 (p78) | 33.41 | 0.53 | 18.91 | 0.16 | 1.653E-05 |
| 34 | den_road >11.996 (p56) &prop_agricultural <0.021 (p69)                                   | rate_local4 >0.457 (p45) | 66.68 | 0.74 | 18.80 | 0.03 | 7.77E-05  |
| 35 | med_income <27261.773 (p84) &prop_agricultural <0.014 (p61) &prop_grassland <0.067 (p66) | rate_local4 >0.421 (p42) | 65.96 | 0.80 | 18.78 | 0.05 | 6.086E-05 |
| 36 | med_area_home <18.225 (p55) &prop_woodland <0.088 (p43) &LU_entropy <0.551 (p49)         | rate_local4 >0.796 (p77) | 26.44 | 0.81 | 18.76 | 0.21 | 1.67E-05  |
| 37 | prop_agricultural <0.012 (p60) &prop_shrubland <0.099 (p56)                              | rate_local4 >0.481 (p49) | 66.92 | 0.70 | 18.72 | 0.09 | 2.668E-05 |
| 38 | ave_household_size <2.969 (p63) &prop_rural_set <0.001 (p46) &LU_entropy <0.551 (p49)    | rate_local4 >0.867 (p80) | 27.47 | 0.63 | 18.69 | 0.13 | 6.515E-05 |
| 39 | den_population >24987.561 (p56) &den_road >12.063 (p56)                                  | rate_local4 >0.466 (p46) | 54.94 | 0.79 | 18.68 | 0.09 | 3.783E-05 |
| 40 | den_bldg >0.226 (p62)                                                                    | rate_local4 >0.603 (p64) | 50.39 | 0.60 | 18.56 | 0.22 | 3.089E-07 |
| 41 | med_area_home <18.664 (p56) &prop_agricultural <0.010 (p59) &LU_entropy <0.551 (p49)     | rate_local4 >0.797 (p77) | 28.38 | 0.68 | 18.53 | 0.10 | 6.38E-05  |
| 42 | den_public_trans >18.777 (p53) &LU_entropy <0.553 (p49)                                  | rate_local4 >0.800 (p78) | 30.72 | 0.59 | 18.52 | 0.22 | 5.005E-07 |
| 43 | prop_grassland <0.027 (p51) &LU_entropy <0.551 (p49)                                     | rate_local4 >0.905 (p81) | 29.95 | 0.49 | 18.48 | 0.17 | 2.07E-06  |
| 44 | prop_transport >0.096 (p41) &prop_woodland <0.128 (p53)                                  | rate_local4 >0.767 (p74) | 40.29 | 0.47 | 18.43 | 0.10 | 7.07E-05  |
| 45 | prop_rural_set <0.011 (p59) &prop_transport >0.088 (p39)                                 | rate_local4 >0.528 (p56) | 60.81 | 0.65 | 18.05 | 0.08 | 7.362E-05 |
| 46 | med_income <23878.185 (p79) &den_bldg >0.293 (p72)                                       | rate_local4 >0.774 (p75) | 29.22 | 0.65 | 17.99 | 0.13 | 5.123E-05 |
| 47 | prop_shrubland <0.000 (p0)                                                               | rate_local4 >0.785 (p76) | 27.11 | 0.71 | 17.92 | 0.47 | 4.929E-14 |

|                                                                      |                          |       |      |       |      |           |
|----------------------------------------------------------------------|--------------------------|-------|------|-------|------|-----------|
| 48 den_bldg >0.149 (p44) &prop_agricultural <0.024 (p71)             | rate_local4 >0.476 (p49) | 72.91 | 0.68 | 17.90 | 0.04 | 7.33E-05  |
| 49 den_bldg >0.117 (p37) &prop_woodland <0.124 (p53)                 | rate_local4 >0.788 (p77) | 39.51 | 0.44 | 17.83 | 0.08 | 8.008E-05 |
| 50 prop_rural_set <0.010 (p57) &prop_woodland <0.096 (p46)           | rate_local4 >0.737 (p74) | 36.86 | 0.52 | 17.81 | 0.11 | 7.81E-05  |
| 51 med_area_home <16.801 (p50) &LU_entropy <0.551 (p49)              | rate_local4 >0.813 (p78) | 27.15 | 0.65 | 17.66 | 0.28 | 7.617E-08 |
| ave_household_size <2.950 (p63) &med_area_home <21.925 (p78)         | rate_local4 >0.770 (p75) | 29.61 | 0.62 | 17.64 | 0.11 | 5.782E-05 |
| 52 &LU_entropy <0.555 (p50)                                          | rate_local4 >0.752 (p74) | 34.29 | 0.54 | 17.54 | 0.15 | 3.589E-05 |
| 53 prop_private_resid >0.057 (p55) &prop_woodland <0.108 (p50)       | rate_local4 >0.336 (p35) | 70.16 | 0.89 | 17.52 | 0.08 | 1.854E-05 |
| med_income <23017.503 (p78) &prop_agricultural <0.022 (p70)          | rate_local4 >0.716 (p71) | 38.72 | 0.52 | 17.52 | 0.09 | 7.897E-05 |
| 54 &prop_shrubland <0.118 (p59)                                      | rate_local4 >0.766 (p74) | 39.90 | 0.46 | 17.43 | 0.20 | 1.127E-08 |
| 55 prop_agricultural <0.016 (p63) &prop_woodland <0.093 (p45)        | rate_local4 >0.848 (p80) | 28.16 | 0.56 | 17.42 | 0.34 | 1.388E-13 |
| 56 prop_agricultural <0.001 (p40)                                    | rate_local4 >0.528 (p56) | 56.17 | 0.66 | 17.37 | 0.07 | 5.015E-05 |
| 57 prop_grassland <0.004 (p23)                                       | rate_local4 >0.383 (p38) | 77.74 | 0.79 | 17.35 | 0.07 | 7.293E-05 |
| 58 prop_rural_set <0.011 (p59) &prop_grassland <0.026 (p51)          | rate_local4 >0.794 (p77) | 25.50 | 0.73 | 17.28 | 0.20 | 4.009E-05 |
| 59 med_income <27378.576 (p84) &prop_agricultural <0.011 (p60)       | rate_local4 >0.811 (p78) | 30.42 | 0.53 | 17.27 | 0.16 | 3.321E-05 |
| med_income <23017.503 (p78) &prop_private_resid >0.045 (p49)         | rate_local4 >0.722 (p72) | 26.84 | 0.79 | 17.08 | 0.22 | 6.76E-05  |
| 60 &LU_entropy <0.551 (p49)                                          | rate_local4 >0.694 (p70) | 31.12 | 0.67 | 17.07 | 0.18 | 7.577E-05 |
| 61 ave_household_size <2.908 (p63) &LU_entropy <0.551 (p49)          | rate_local4 >0.827 (p79) | 24.94 | 0.69 | 17.05 | 0.17 | 2.642E-05 |
| 62 ave_household_size <2.739 (p37) &prop_grassland <0.007 (p30)      | rate_local4 >0.466 (p46) | 63.71 | 0.71 | 16.81 | 0.19 | 1.213E-06 |
| 63 ave_household_size <2.771 (p37) &prop_agricultural <0.001 (p43)   | rate_local4 >0.694 (p70) | 32.72 | 0.62 | 16.77 | 0.18 | 6.159E-05 |
| med_income <23017.503 (p78) &prop_open_recreation >0.026 (p45)       | rate_local4 >0.350 (p36) | 58.38 | 0.91 | 16.76 | 0.09 | 6.451E-05 |
| 64 &LU_entropy <0.551 (p49)                                          | rate_local4 >0.794 (p77) | 27.32 | 0.60 | 16.50 | 0.17 | 6.413E-05 |
| 65 den_population >26219.620 (p60)                                   | rate_local4 >0.789 (p77) | 27.76 | 0.58 | 16.37 | 0.20 | 6.484E-07 |
| 66 ave_household_size <2.771 (p37) &prop_rural_set <0.005 (p53)      | rate_local4 >0.309 (p30) | 82.26 | 0.86 | 16.16 | 0.07 | 7.365E-05 |
| med_income <24196.197 (p79) &prop_rural_set <0.034 (p70)             | rate_local4 >0.751 (p74) | 26.29 | 0.67 | 16.00 | 0.19 | 6.676E-05 |
| 67 &prop_shrubland <0.081 (p53)                                      | rate_local4 >0.753 (p74) | 27.23 | 0.63 | 15.93 | 0.19 | 7.356E-05 |
| 68 med_income <24580.681 (p79) &prop_private_resid >0.103 (p66)      | rate_local4 >0.297 (p29) | 89.86 | 0.86 | 15.93 | 0.06 | 7.813E-06 |
| 69 prop_private_resid >0.070 (p58) &LU_entropy <0.543 (p46)          | rate_local4 >0.297 (p29) | 82.99 | 0.87 | 15.90 | 0.07 | 2.413E-05 |
| 70 prop_agricultural <0.013 (p61) &POI_pp_telecom_elec <20.130 (p68) | rate_local4 >0.297 (p29) | 69.95 | 0.91 | 15.88 | 0.04 | 8.253E-07 |
| 71 ave_household_size <2.660 (p29) &prop_woodland <0.064 (p36)       | rate_local4 >0.630 (p64) | 50.56 | 0.52 | 15.79 | 0.16 | 4.681E-05 |
| 72 ave_household_size <2.688 (p29) &prop_shrubland <0.048 (p45)      |                          |       |      |       |      |           |
| 73 prop_agricultural <0.016 (p63) &POI_pp_edu <22.044 (p79)          |                          |       |      |       |      |           |
| 74 prop_agricultural <0.016 (p63) &POI_pp_transport <46.920 (p69)    |                          |       |      |       |      |           |
| med_area_home <17.445 (p52) &prop_agricultural <0.016 (p63)          |                          |       |      |       |      |           |
| 75 &POI_pp_edu <22.044 (p79)                                         |                          |       |      |       |      |           |
| 76 prop_rural_set <0.001 (p46)                                       |                          |       |      |       |      |           |

|                                                                            |                          |       |      |       |      |           |
|----------------------------------------------------------------------------|--------------------------|-------|------|-------|------|-----------|
| med_income <26849.258 (p83) &prop_rural_set <0.030 (p69)                   | rate_local4 >0.297 (p29) | 69.42 | 0.91 | 15.78 | 0.06 | 2.417E-05 |
| <b>77</b> &prop_transport >0.094 (p40)                                     |                          |       |      |       |      |           |
| med_income <25084.765 (p81) &den_road >12.237 (p56) &prop_industrial       | rate_local4 >0.963 (p84) | 20.91 | 0.67 | 15.71 | 0.22 | 4.003E-05 |
| <b>78</b> <0.000 (p36)                                                     |                          |       |      |       |      |           |
| <b>79</b> prop_open_recreation >0.030 (p48) &LU_entropy <0.551 (p49)       | rate_local4 >0.804 (p78) | 26.92 | 0.55 | 15.70 | 0.18 | 7.193E-06 |
| <b>80</b> prop_agricultural <0.016 (p63) &POI_pp_mall_mkt <11.956 (p79)    | rate_local4 >0.297 (p29) | 87.04 | 0.86 | 15.70 | 0.06 | 1.027E-05 |
| med_income <26890.250 (p83) &prop_business >0.020 (p77) &LU_entropy        | rate_local4 >0.794 (p77) | 22.76 | 0.75 | 15.61 | 0.14 | 4.218E-05 |
| <b>81</b> <0.557 (p50)                                                     |                          |       |      |       |      |           |
| <b>82</b> den_bldg >0.113 (p37) &prop_shrubland <0.133 (p64)               | rate_local4 >0.425 (p42) | 83.37 | 0.70 | 15.56 | 0.05 | 6.068E-05 |
| <b>83</b> med_income <23549.657 (p78) &den_road >12.275 (p56)              | rate_local4 >0.332 (p33) | 61.54 | 0.90 | 15.55 | 0.08 | 5.389E-05 |
| med_area_home <18.774 (p57) &prop_rural_set <0.004 (p52) &LU_entropy       | rate_local4 >0.702 (p71) | 25.35 | 0.77 | 15.55 | 0.12 | 6.675E-05 |
| <b>84</b> <0.526 (p40)                                                     |                          |       |      |       |      |           |
| med_income <24082.337 (p79) &prop_publicResid <0.019 (p64)                 | rate_local4 >0.809 (p78) | 24.24 | 0.63 | 15.46 | 0.18 | 6.286E-05 |
| <b>85</b> &prop_transport >0.102 (p43)                                     |                          |       |      |       |      |           |
| med_income <24190.580 (p79) &den_bldg >0.159 (p47) &prop_industrial        | rate_local4 >0.868 (p80) | 22.66 | 0.62 | 15.38 | 0.20 | 5.334E-05 |
| <b>86</b> <0.001 (p50)                                                     |                          |       |      |       |      |           |
| <b>87</b> med_area_home <17.682 (p54) &prop_agricultural <0.025 (p71)      | rate_local4 >0.398 (p40) | 72.64 | 0.76 | 15.38 | 0.08 | 3.933E-05 |
| <b>88</b> med_income <27900.398 (p84) &prop_rural_set <0.001 (p48)         | rate_local4 >0.334 (p34) | 66.11 | 0.87 | 15.33 | 0.08 | 6.776E-06 |
| med_area_home <17.445 (p52) &prop_agricultural <0.016 (p63)                | rate_local4 >0.297 (p29) | 66.19 | 0.92 | 15.28 | 0.04 | 4.646E-06 |
| <b>89</b> &POI_pp_transport <46.920 (p69)                                  |                          |       |      |       |      |           |
| <b>90</b> den_population >25206.184 (p57) &prop_transport >0.225 (p69)     | rate_local4 >0.459 (p45) | 43.12 | 0.82 | 15.27 | 0.07 | 5.948E-05 |
| <b>91</b> prop_transport >0.104 (p44) &LU_entropy <0.535 (p43)             | rate_local4 >1.002 (p86) | 24.18 | 0.47 | 15.27 | 0.18 | 5.883E-06 |
| <b>92</b> med_income <23865.262 (p79) &prop_transport >0.225 (p69)         | rate_local4 >0.431 (p43) | 45.30 | 0.85 | 15.25 | 0.08 | 5.562E-05 |
| <b>93</b> ave_household_size <2.924 (p63) &prop_private_resid >0.085 (p63) | rate_local4 >0.788 (p77) | 26.46 | 0.56 | 15.23 | 0.16 | 4.897E-05 |
| <b>94</b> ave_household_size <2.784 (p37) &den_bldg >0.117 (p37)           | rate_local4 >0.703 (p71) | 34.91 | 0.52 | 15.20 | 0.11 | 8.025E-05 |
| med_income <31762.966 (p88) &den_bldg >0.160 (p47) &prop_shrubland         | rate_local4 >0.299 (p29) | 76.13 | 0.88 | 15.03 | 0.03 | 5.7E-05   |
| <b>95</b> <0.132 (p64)                                                     |                          |       |      |       |      |           |
| <b>96</b> med_income <23954.158 (p79) &den_public_trans >19.357 (p54)      | rate_local4 >0.330 (p33) | 71.48 | 0.85 | 15.01 | 0.05 | 3.628E-05 |
| med_area_home <16.985 (p52) &prop_agricultural <0.016 (p63)                | rate_local4 >0.297 (p29) | 66.41 | 0.91 | 14.99 | 0.03 | 1.638E-05 |
| <b>97</b> &POI_pp_sports <35.908 (p73)                                     |                          |       |      |       |      |           |
| med_income <23935.978 (p79) &den_road >9.841 (p46) &prop_rural_set         | rate_local4 >0.308 (p30) | 58.82 | 0.93 | 14.97 | 0.06 | 8.219E-05 |
| <b>98</b> <0.005 (p54)                                                     |                          |       |      |       |      |           |
| med_income <28540.924 (p84) &prop_agricultural <0.012 (p60)                | rate_local4 >0.297 (p29) | 72.28 | 0.89 | 14.96 | 0.03 | 7.126E-05 |
| <b>99</b> &POI_pp_edu <21.253 (p78)                                        |                          |       |      |       |      |           |
| med_area_home <17.445 (p52) &prop_agricultural <0.016 (p63)                | rate_local4 >0.297 (p29) | 65.22 | 0.91 | 14.85 | 0.04 | 3.325E-06 |
| <b>100</b> &POI_pp_telecom_elec <18.648 (p66)                              |                          |       |      |       |      |           |

|                                                                             |                          |       |      |       |      |           |
|-----------------------------------------------------------------------------|--------------------------|-------|------|-------|------|-----------|
| <b>101</b> build_area_pp <62.470 (p50) &prop_agricultural <0.013 (p61)      | rate_local4 >0.309 (p30) | 65.43 | 0.90 | 14.84 | 0.10 | 4.488E-06 |
| <b>102</b> prop_industrial <0.000 (p41) &prop_woodland <0.079 (p41)         | rate_local4 >0.978 (p85) | 21.03 | 0.53 | 14.74 | 0.23 | 1.442E-05 |
| <b>103</b> ave_household_size <2.787 (p37) &prop_industrial <0.000 (p36)    | rate_local4 >0.868 (p80) | 22.23 | 0.60 | 14.73 | 0.23 | 1.409E-05 |
| med_income <23641.798 (p78) &den_public_trans >18.687 (p53)                 | rate_local4 >0.855 (p80) | 21.86 | 0.64 | 14.70 | 0.18 | 5.161E-05 |
| <b>104</b> &prop_publicResid <0.021 (p65)                                   | rate_local4 >0.765 (p74) | 29.27 | 0.51 | 14.66 | 0.11 | 5.005E-05 |
| <b>105</b> prop_gov_insti_faci >0.025 (p36) &LU_entropy <0.546 (p47)        | rate_local4 >0.847 (p80) | 23.71 | 0.55 | 14.62 | 0.16 | 3.651E-05 |
| med_income <24082.337 (p79) &den_bldg >0.143 (p43) &prop_publicResid        | rate_local4 >0.897 (p81) | 25.98 | 0.43 | 14.55 | 0.24 | 3.647E-08 |
| <b>106</b> <0.019 (p64)                                                     | rate_local4 >0.805 (p78) | 22.74 | 0.62 | 14.36 | 0.21 | 3.029E-05 |
| <b>107</b> prop_transport >0.241 (p71)                                      | rate_local4 >0.299 (p29) | 67.89 | 0.89 | 14.33 | 0.02 | 4.846E-05 |
| <b>108</b> prop_business >0.020 (p77) &LU_entropy <0.547 (p47)              | rate_local4 >0.863 (p80) | 34.55 | 0.34 | 14.21 | 0.14 | 1.67E-07  |
| med_income <26378.359 (p83) &med_area_home <17.924 (p55)                    | rate_local4 >0.871 (p80) | 20.25 | 0.66 | 14.15 | 0.24 | 5.195E-05 |
| <b>109</b> &prop_rural_set <0.012 (p59)                                     | rate_local4 >0.648 (p66) | 27.29 | 0.70 | 13.98 | 0.18 | 6.353E-05 |
| <b>110</b> LU_entropy <0.548 (p47)                                          | rate_local4 >0.731 (p73) | 36.23 | 0.45 | 13.84 | 0.17 | 1E-06     |
| med_income <20626.543 (p73) &den_road >10.786 (p50)                         | rate_local4 >0.846 (p80) | 19.86 | 0.67 | 13.60 | 0.24 | 1.993E-05 |
| <b>111</b> &prop_publicResid <0.017 (p63)                                   | rate_local4 >0.307 (p30) | 67.74 | 0.87 | 13.38 | 0.06 | 2.228E-05 |
| <b>112</b> ave_household_size <2.670 (p29) &den_population >17876.725 (p50) | rate_local4 >0.964 (p84) | 18.25 | 0.63 | 13.37 | 0.20 | 7.668E-05 |
| <b>113</b> prop_private_resid >0.087 (p64)                                  | rate_local4 >0.917 (p81) | 20.79 | 0.50 | 13.35 | 0.19 | 5.171E-05 |
| med_income <21943.402 (p75) &prop_publicResid <0.003 (p55)                  | rate_local4 >0.579 (p62) | 30.04 | 0.72 | 13.20 | 0.22 | 1.864E-05 |
| <b>114</b> &prop_agricultural <0.009 (p59)                                  | rate_local4 >0.827 (p79) | 19.48 | 0.68 | 13.18 | 0.22 | 4.616E-05 |
| <b>115</b> build_area_pp <60.573 (p50) &prop_rural_set <0.035 (p70)         | rate_local4 >0.883 (p81) | 17.76 | 0.75 | 13.17 | 0.27 | 5.077E-05 |
| med_income <20556.841 (p73) &prop_publicResid <0.012 (p61)                  | rate_local4 >1.076 (p87) | 17.70 | 0.51 | 13.12 | 0.22 | 7.716E-05 |
| <b>116</b> &prop_shrubland <0.036 (p41)                                     | rate_local4 >0.299 (p29) | 68.29 | 0.87 | 13.12 | 0.09 | 5.205E-05 |
| <b>117</b> den_public_trans >26.097 (p59) &prop_publicResid <0.010 (p60)    | rate_local4 >0.889 (p81) | 18.93 | 0.63 | 13.11 | 0.24 | 3.253E-05 |
| <b>118</b> med_area_home <15.838 (p46) &POI_pp_edu =4.426-24.205 (p27-81)   | rate_local4 >0.895 (p81) | 18.62 | 0.63 | 13.02 | 0.22 | 4.562E-05 |
| med_income <24082.337 (p79) &prop_rural_set <0.001 (p46)                    | rate_local4 >0.253 (p24) | 78.04 | 0.89 | 12.96 | 0.07 | 3.482E-05 |
| <b>119</b> &POI_pp_sports >19.996 (p53)                                     | rate_local4 >0.865 (p80) | 27.87 | 0.38 | 12.90 | 0.17 | 2.343E-07 |
| med_income <22034.807 (p77) &prop_publicResid <0.000 (p44)                  |                          |       |      |       |      |           |
| <b>120</b> &prop_rural_set <0.001 (p48)                                     |                          |       |      |       |      |           |
| <b>121</b> prop_industrial <0.000 (p41) &prop_transport >0.211 (p66)        |                          |       |      |       |      |           |
| <b>122</b> med_area_home <17.924 (p55) &prop_rural_set <0.012 (p59)         |                          |       |      |       |      |           |
| med_area_home <18.806 (p57) &prop_publicResid <0.023 (p66)                  |                          |       |      |       |      |           |
| <b>123</b> &prop_grassland <0.027 (p51)                                     |                          |       |      |       |      |           |
| med_income <24082.337 (p79) &den_road >10.205 (p48)                         |                          |       |      |       |      |           |
| <b>124</b> &POI_pp_mall_mkt >6.459 (p57)                                    |                          |       |      |       |      |           |
| <b>125</b> med_area_home <17.143 (p52) &prop_grassland <0.079 (p70)         |                          |       |      |       |      |           |
| <b>126</b> ave_household_size <2.713 (p37)                                  |                          |       |      |       |      |           |

|                                                                           |                          |       |      |       |      |           |
|---------------------------------------------------------------------------|--------------------------|-------|------|-------|------|-----------|
| med_income <24082.337 (p79) &prop_transport >0.108 (p46)                  | rate_local4 >0.802 (p78) | 19.76 | 0.66 | 12.80 | 0.18 | 2.342E-05 |
| <b>127</b> &POI_pp_sports >19.996 (p53)                                   |                          |       |      |       |      |           |
| med_income <24082.337 (p79) &den_road >10.205 (p48) &POI_pp_sports        | rate_local4 >0.827 (p79) | 19.00 | 0.67 | 12.74 | 0.21 | 1.948E-05 |
| <b>128</b> >19.996 (p53)                                                  |                          |       |      |       |      |           |
| <b>129</b> prop_industrial <0.000 (p36)                                   | rate_local4 >1.033 (p86) | 23.82 | 0.31 | 12.74 | 0.17 | 2.01E-07  |
| med_income <23276.021 (p78) &prop_rural_set <0.001 (p47)                  | rate_local4 >0.867 (p80) | 17.95 | 0.68 | 12.65 | 0.24 | 1.314E-05 |
| <b>130</b> &POI_pp_mall_mkt >7.209 (p60)                                  |                          |       |      |       |      |           |
| med_income <24271.605 (p79) &den_bldg >0.160 (p47) &POI_pp_mall_mkt       | rate_local4 >0.856 (p80) | 18.49 | 0.65 | 12.62 | 0.21 | 5.202E-06 |
| <b>131</b> >7.122 (p60)                                                   |                          |       |      |       |      |           |
| med_income <23241.294 (p78) &prop_rural_set <0.002 (p49)                  | rate_local4 >0.815 (p78) | 18.37 | 0.70 | 12.49 | 0.24 | 6.878E-05 |
| <b>132</b> &POI_pp_transport >32.416 (p54)                                |                          |       |      |       |      |           |
| <b>133</b> med_income <14989.703 (p27) &prop_woodland <0.048 (p31)        | rate_local4 >0.844 (p80) | 17.70 | 0.70 | 12.39 | 0.25 | 4.493E-05 |
| <b>134</b> med_income <14793.785 (p26) &LU_entropy <0.523 (p40)           | rate_local4 >0.824 (p79) | 16.83 | 0.83 | 12.33 | 0.46 | 1.042E-07 |
| med_income <20556.841 (p73) &prop_publicResid <0.012 (p61)                | rate_local4 >0.964 (p84) | 16.86 | 0.61 | 12.21 | 0.21 | 3.042E-05 |
| <b>135</b> &prop_grassland <0.021 (p46)                                   |                          |       |      |       |      |           |
| <b>136</b> prop_preprim_edu <0.143 (p88) &med_area_home <17.670 (p54)     | rate_local4 >0.289 (p29) | 86.10 | 0.83 | 12.14 | 0.05 | 4.795E-05 |
| <b>137</b> den_population >23908.264 (p55) &prop_publicResid <0.003 (p55) | rate_local4 >0.798 (p77) | 19.59 | 0.62 | 12.05 | 0.24 | 3.907E-05 |
| med_income <24082.337 (p79) &prop_transport >0.108 (p46)                  | rate_local4 >0.802 (p78) | 18.40 | 0.67 | 12.03 | 0.19 | 4.034E-05 |
| <b>138</b> &POI_pp_transport >32.812 (p55)                                |                          |       |      |       |      |           |
| med_income <24082.337 (p79) &den_road >10.205 (p48)                       | rate_local4 >0.816 (p78) | 17.62 | 0.69 | 11.89 | 0.23 | 3.485E-05 |
| <b>139</b> &POI_pp_transport >33.359 (p56)                                |                          |       |      |       |      |           |
| <b>140</b> med_income <24618.752 (p79) &prop_shrubland <0.006 (p29)       | rate_local4 >0.349 (p36) | 41.49 | 0.91 | 11.88 | 0.10 | 3.884E-05 |
| med_income <20556.841 (p73) &prop_private_resid >0.053 (p52)              | rate_local4 >0.964 (p84) | 16.79 | 0.57 | 11.83 | 0.23 | 7.817E-05 |
| <b>141</b> &prop_publicResid <0.012 (p61)                                 |                          |       |      |       |      |           |
| med_income <24082.337 (p79) &prop_transport >0.108 (p46)                  | rate_local4 >0.802 (p78) | 17.48 | 0.71 | 11.81 | 0.22 | 1.27E-05  |
| <b>142</b> &POI_pp_mall_mkt >7.865 (p63)                                  |                          |       |      |       |      |           |
| med_income <24082.337 (p79) &den_road >11.631 (p53)                       | rate_local4 >0.849 (p80) | 17.23 | 0.66 | 11.75 | 0.21 | 6.413E-05 |
| <b>143</b> &POI_pp_telecom_elec >12.518 (p51)                             |                          |       |      |       |      |           |
| med_income <23276.021 (p78) &prop_agricultural <0.008 (p57)               | rate_local4 >0.867 (p80) | 17.53 | 0.61 | 11.70 | 0.22 | 3.66E-05  |
| <b>144</b> &POI_pp_mall_mkt >7.209 (p60)                                  |                          |       |      |       |      |           |
| <b>145</b> prop_business >0.058 (p86)                                     | rate_local4 >0.784 (p76) | 18.49 | 0.65 | 11.61 | 0.41 | 1.455E-08 |
| prop_agricultural <0.017 (p64) &prop_grassland <0.071 (p68)               | rate_local4 >0.289 (p29) | 46.01 | 0.94 | 11.25 | 0.05 | 5.489E-05 |
| <b>146</b> &POI_pp_transport <21.102 (p43)                                |                          |       |      |       |      |           |
| <b>147</b> med_area_home <16.759 (p50) &prop_private_resid >0.175 (p80)   | rate_local4 >0.834 (p79) | 15.16 | 0.75 | 10.75 | 0.29 | 6.168E-05 |
| med_income <23943.235 (p79) &den_bldg >0.160 (p47) &POI_pp_sports         | rate_local4 >0.867 (p80) | 16.03 | 0.61 | 10.71 | 0.20 | 2.676E-05 |
| <b>148</b> >23.218 (p59)                                                  |                          |       |      |       |      |           |

|                                                                                                                                                  |                                   |        |      |       |      |           |
|--------------------------------------------------------------------------------------------------------------------------------------------------|-----------------------------------|--------|------|-------|------|-----------|
| <b>149</b> med_area_home <16.705 (p50) &POI_pp_mall_mkt =3.036-11.675 (p38-77)<br>med_income <24424.417 (p79) &prop_agricultural <0.005 (p51)    | rate_local4 >0.685 (p70)          | 19.54  | 0.68 | 10.63 | 0.27 | 3.488E-06 |
| <b>150</b> &POI_pp_sports >23.218 (p59)                                                                                                          | rate_local4 >0.830 (p79)          | 16.00  | 0.62 | 10.33 | 0.20 | 7.629E-05 |
| <b>151</b> med_area_home <18.066 (p55) &prop_publicResid <0.000 (p44)                                                                            | rate_local4 >0.906 (p81)          | 15.35  | 0.55 | 10.17 | 0.29 | 2.137E-05 |
| <b>152</b> build_area_pp <58.100 (p47)                                                                                                           | rate_local4 >0.222 (p21)          | 83.55  | 0.87 | 10.09 | 0.11 | 1.522E-05 |
| <b>153</b> prop_woodland <0.016 (p25)                                                                                                            | rate_local4 >1.282 (p90)          | 15.27  | 0.29 | 10.03 | 0.19 | 3.756E-08 |
| <b>154</b> med_area_home <15.641 (p45)                                                                                                           | rate_local4 >0.299 (p29)          | 74.53  | 0.81 | 9.64  | 0.10 | 7.299E-05 |
| <b>155</b> med_income <23865.262 (p79) &prop_business >0.038 (p84)<br>med_income <23641.798 (p78) &prop_shrubland <0.048 (p44)                   | rate_local4 >0.431 (p43)          | 28.14  | 0.84 | 9.20  | 0.11 | 6.398E-05 |
| <b>156</b> &POI_pp_transport >42.763 (p64)                                                                                                       | rate_local4 >0.984 (p85)          | 11.09  | 0.62 | 8.25  | 0.22 | 7.123E-05 |
| <b>157</b> med_area_home <18.225 (p55) &POI_pp_sports >22.655 (p58)                                                                              | rate_local4 >0.870 (p80)          | 14.21  | 0.45 | 7.90  | 0.18 | 4.278E-05 |
| <b>158</b> den_public_trans >95.120 (p92)                                                                                                        | rate_local4 >0.780 (p76)          | 12.45  | 0.67 | 7.89  | 0.42 | 1.191E-05 |
| <b>159</b> den_public_trans =46.130-95.120 (p78-92)                                                                                              | rate_local4 >0.780 (p76)          | 15.91  | 0.45 | 7.37  | 0.21 | 6.368E-05 |
| <b>160</b> med_income <12559.030 (p7)                                                                                                            | rate_local4 >0.831 (p79)          | 8.91   | 0.64 | 5.86  | 0.42 | 2.821E-05 |
| <b>161</b> prop_household_3gen <0.018 (p15) &med_area_home =13.055-16.289 (p18-49)<br>gender_ratio >87.552 (p11) &den_public_trans <62.626 (p84) | rate_local4 >0.807 (p78)          | 5.48   | 0.90 | 4.08  | 0.55 | 8.043E-05 |
| <b>162</b> &POI_pp_transport <63.461 (p78)<br>gender_ratio >87.552 (p11) &prop_business <0.055 (p86)                                             | rate_local4 =0.074-0.862 (p13-80) | 106.96 | 0.87 | 25.33 | 0.04 | 2.889E-06 |
| <b>163</b> &POI_pp_transport <61.104 (p78)                                                                                                       | rate_local4 =0.116-1.001 (p14-86) | 114.51 | 0.89 | 23.71 | 0.03 | 2.871E-05 |
| <b>164</b> den_road <17.297 (p74) &POI_pp_transport <61.104 (p78)<br>gender_ratio >87.664 (p11) &den_road <22.221 (p86)                          | rate_local4 =0.119-0.854 (p14-80) | 104.43 | 0.84 | 23.63 | 0.09 | 2.29E-06  |
| <b>165</b> &POI_pp_telecom_elec <30.272 (p80)<br>gender_ratio >87.552 (p11) &ave_household_size >2.554 (p17)                                     | rate_local4 =0.075-0.782 (p13-76) | 102.72 | 0.81 | 23.47 | 0.03 | 6.635E-05 |
| <b>166</b> &POI_pp_transport <63.461 (p78)                                                                                                       | rate_local4 =0.029-1.030 (p13-86) | 109.42 | 0.91 | 23.23 | 0.04 | 8.243E-05 |
| <b>167</b> den_road <17.068 (p72) &POI_pp_telecom_elec <28.789 (p79)<br>prop_preprim_edu <0.149 (p90) &ave_household_size >2.627 (p29)           | rate_local4 =0.117-0.793 (p14-77) | 99.71  | 0.81 | 23.17 | 0.09 | 4.255E-08 |
| <b>168</b> &POI_pp_transport <64.846 (p78)<br>gender_ratio >87.552 (p11) &LU_entropy >0.507 (p36) &POI_pp_transport                              | rate_local4 =0.152-0.892 (p15-81) | 99.66  | 0.85 | 23.05 | 0.03 | 1.642E-05 |
| <b>169</b> <60.769 (p78)                                                                                                                         | rate_local4 =0.127-0.859 (p14-80) | 91.26  | 0.87 | 22.93 | 0.05 | 2.403E-06 |
| <b>170</b> den_public_trans <48.505 (p79) &POI_pp_transport <60.966 (p78)                                                                        | rate_local4 =0.075-0.771 (p13-75) | 101.81 | 0.79 | 22.78 | 0.08 | 1.151E-05 |
| <b>171</b> den_bldg <0.442 (p84) &POI_pp_transport <61.104 (p78)                                                                                 | rate_local4 =0.119-0.854 (p14-80) | 114.32 | 0.81 | 22.58 | 0.06 | 2.049E-06 |
| <b>172</b> den_public_trans <62.360 (p84) &POI_pp_sports <27.660 (p65)                                                                           | rate_local4 =0.119-0.893 (p14-81) | 101.26 | 0.86 | 22.57 | 0.07 | 1.239E-08 |
| <b>173</b> den_public_trans <59.674 (p84) &POI_pp_telecom_elec <29.787 (p80)                                                                     | rate_local4 =0.146-0.860 (p15-80) | 112.76 | 0.81 | 22.56 | 0.07 | 2.46E-08  |

|            |                                                                        |                                   |        |      |       |      |           |
|------------|------------------------------------------------------------------------|-----------------------------------|--------|------|-------|------|-----------|
| <b>174</b> | den_road <17.892 (p75) &POI_pp_sports <27.660 (p65)                    | rate_local4 =0.119-0.893 (p14-81) | 94.09  | 0.88 | 22.43 | 0.08 | 4.124E-08 |
|            | gender_ratio >87.321 (p11) &den_bldg <0.327 (p76) &POI_pp_telecom_elec | rate_local4 =0.119-0.926 (p14-82) | 99.58  | 0.88 | 22.43 | 0.03 | 3.516E-05 |
| <b>175</b> | <30.098 (p80)                                                          |                                   |        |      |       |      |           |
|            | gender_ratio >87.664 (p11) &den_road <22.221 (p86) &POI_pp_sports      | rate_local4 =0.132-0.855 (p14-80) | 99.17  | 0.84 | 22.35 | 0.02 | 3.001E-05 |
| <b>176</b> | <35.319 (p73)                                                          |                                   |        |      |       |      |           |
| <b>177</b> | prop_business <0.055 (p86) &POI_pp_transport <61.104 (p78)             | rate_local4 =0.116-1.001 (p14-86) | 125.70 | 0.86 | 22.29 | 0.04 | 8.775E-06 |
|            | prop_preprim_edu <0.152 (p91) &den_road <23.627 (p88)                  | rate_local4 =0.156-0.824 (p15-79) | 87.61  | 0.84 | 22.11 | 0.03 | 6.631E-05 |
| <b>178</b> | &POI_pp_transport <36.856 (p59)                                        |                                   |        |      |       |      |           |
| <b>179</b> | LU_entropy >0.529 (p41) &POI_pp_telecom_elec <29.095 (p79)             | rate_local4 =0.140-0.863 (p14-80) | 93.04  | 0.84 | 22.04 | 0.06 | 3.469E-06 |
| <b>180</b> | prop_business <0.055 (p86) &POI_pp_telecom_elec <29.275 (p79)          | rate_local4 =0.116-1.001 (p14-86) | 126.69 | 0.85 | 21.99 | 0.05 | 8.133E-07 |
|            | gender_ratio >87.719 (p11) &LU_entropy >0.509 (p36)                    | rate_local4 =0.130-1.016 (p14-86) | 95.60  | 0.92 | 21.88 | 0.04 | 3.473E-08 |
| <b>181</b> | &POI_pp_telecom_elec <28.491 (p79)                                     |                                   |        |      |       |      |           |
| <b>182</b> | LU_entropy >0.522 (p40) &POI_pp_sports <28.731 (p66)                   | rate_local4 =0.119-0.888 (p14-81) | 89.34  | 0.88 | 21.87 | 0.09 | 1.684E-06 |
|            | gender_ratio >87.552 (p11) &LU_entropy >0.509 (p36) &POI_pp_sports     | rate_local4 =0.136-0.875 (p14-80) | 89.58  | 0.87 | 21.78 | 0.03 | 3.063E-06 |
| <b>183</b> | <39.565 (p78)                                                          |                                   |        |      |       |      |           |
| <b>184</b> | den_road <17.665 (p75) &POI_pp_edu <15.683 (p69)                       | rate_local4 =0.119-0.888 (p14-81) | 96.47  | 0.86 | 21.72 | 0.08 | 2.669E-05 |
|            | gender_ratio >87.664 (p11) &den_road <23.313 (p87) &POI_pp_edu <20.490 | rate_local4 =0.132-0.855 (p14-80) | 103.30 | 0.82 | 21.67 | 0.03 | 7.89E-05  |
| <b>185</b> | (p76)                                                                  |                                   |        |      |       |      |           |
|            | prop_preprim_edu <0.152 (p91) &den_road <23.627 (p88) &POI_pp_edu      | rate_local4 =0.127-1.168 (p14-90) | 113.10 | 0.91 | 21.61 | 0.03 | 8.729E-06 |
| <b>186</b> | <18.296 (p71)                                                          |                                   |        |      |       |      |           |
| <b>187</b> | prop_preprim_edu <0.149 (p90) &LU_entropy >0.543 (p46)                 | rate_local4 =0.152-0.892 (p15-81) | 89.08  | 0.87 | 21.59 | 0.06 | 1.641E-07 |
| <b>188</b> | den_public_trans <60.562 (p84) &POI_pp_edu <14.808 (p67)               | rate_local4 =0.148-0.855 (p15-80) | 98.55  | 0.83 | 21.58 | 0.06 | 1.276E-06 |
| <b>189</b> | ave_household_size >2.713 (p37) &POI_pp_transport <65.844 (p78)        | rate_local4 =0.119-0.865 (p14-80) | 95.57  | 0.85 | 21.58 | 0.09 | 3.322E-06 |
|            | prop_preprim_edu <0.134 (p84) &prop_business <0.078 (p89)              | rate_local4 =0.185-1.255 (p16-90) | 118.43 | 0.88 | 21.56 | 0.04 | 4.998E-06 |
| <b>190</b> | &POI_pp_transport <73.036 (p82)                                        |                                   |        |      |       |      |           |
|            | gender_ratio >87.484 (p11) &prop_preprim_edu <0.149 (p90)              | rate_local4 =0.152-0.892 (p15-81) | 113.66 | 0.81 | 21.50 | 0.04 | 6.846E-06 |
| <b>191</b> | &den_public_trans <68.485 (p86)                                        |                                   |        |      |       |      |           |
|            | prop_preprim_edu <0.155 (p92) &den_public_trans <78.224 (p88)          | rate_local4 =0.176-1.249 (p16-90) | 126.32 | 0.88 | 21.43 | 0.03 | 4.512E-05 |
| <b>192</b> | &POI_pp_transport <73.036 (p82)                                        |                                   |        |      |       |      |           |
|            | gender_ratio >87.552 (p11) &den_public_trans <59.812 (p84) &POI_pp_edu | rate_local4 =0.061-0.885 (p13-81) | 107.41 | 0.84 | 21.36 | 0.04 | 2.81E-05  |
| <b>193</b> | <24.132 (p81)                                                          |                                   |        |      |       |      |           |
| <b>194</b> | build_area_pp <58.100 (p47)                                            | rate_local4 =0.119-0.888 (p14-81) | 91.57  | 0.87 | 21.36 | 0.08 | 1.104E-05 |
| <b>195</b> | gender_ratio >87.313 (p11) &POI_pp_transport <60.966 (p78)             | rate_local4 =0.042-1.091 (p13-87) | 125.64 | 0.88 | 21.31 | 0.04 | 5.07E-06  |
| <b>196</b> | prop_business <0.048 (p86) &POI_pp_sports <34.167 (p71)                | rate_local4 =0.122-1.008 (p14-86) | 115.53 | 0.86 | 21.29 | 0.05 | 5.447E-05 |
| <b>197</b> | ave_household_size >2.577 (p17) &POI_pp_edu <15.808 (p69)              | rate_local4 =0.141-0.946 (p14-83) | 101.59 | 0.86 | 21.26 | 0.06 | 8.574E-06 |
| <b>198</b> | den_public_trans <62.360 (p84) &POI_pp_mall_mkt <8.569 (p65)           | rate_local4 =0.119-0.893 (p14-81) | 102.35 | 0.84 | 21.24 | 0.05 | 4.219E-07 |



|                                                                                                   |                                   |        |      |       |      |           |
|---------------------------------------------------------------------------------------------------|-----------------------------------|--------|------|-------|------|-----------|
| gender_ratio >87.552 (p11) &LU_entropy >0.507 (p36) &POI_pp_edu <24.229 (p81)                     | rate_local4 =0.064-0.851 (p13-80) | 92.87  | 0.85 | 21.20 | 0.04 | 2.794E-06 |
| prop_preprim_edu <0.149 (p90) &den_public_trans <75.883 (p88) &POI_pp_mall_mkt <13.767 (p82)      | rate_local4 =0.152-0.892 (p15-81) | 105.98 | 0.82 | 21.16 | 0.04 | 8.19E-05  |
| LU_entropy >0.522 (p40) &POI_pp_transport <45.562 (p69) &POI_pp_mall_mkt <13.767 (p82)            | rate_local4 =0.119-0.888 (p14-81) | 90.82  | 0.87 | 21.11 | 0.08 | 1.949E-06 |
| prop_preprim_edu <0.149 (p90) &den_road <16.141 (p71) &POI_pp_mall_mkt <13.767 (p82)              | rate_local4 =0.152-0.892 (p15-81) | 89.90  | 0.86 | 21.07 | 0.05 | 7.633E-05 |
| den_road <18.362 (p76) &POI_pp_mall_mkt <9.434 (p66)                                              | rate_local4 =0.133-0.898 (p14-81) | 99.36  | 0.85 | 21.05 | 0.06 | 6.746E-06 |
| ave_household_size >2.627 (p29) &POI_pp_telecom_elec <31.680 (p80) &POI_pp_mall_mkt <13.767 (p82) | rate_local4 =0.152-0.892 (p15-81) | 105.85 | 0.82 | 20.97 | 0.08 | 9.036E-06 |
| prop_preprim_edu <0.149 (p90) &prop_business <0.057 (p86) &POI_pp_mall_mkt <13.767 (p82)          | rate_local4 =0.152-0.892 (p15-81) | 107.11 | 0.82 | 20.96 | 0.04 | 3.917E-05 |
| prop_preprim_edu <0.149 (p90) &ave_household_size >2.627 (p29) &POI_pp_mall_mkt <12.788 (p81)     | rate_local4 =0.152-0.892 (p15-81) | 96.03  | 0.84 | 20.88 | 0.03 | 4.652E-05 |
| LU_entropy >0.522 (p40) &POI_pp_mall_mkt <9.905 (p70)                                             | rate_local4 =0.171-0.959 (p16-83) | 92.31  | 0.86 | 20.87 | 0.08 | 2.491E-05 |
| den_bldg <0.312 (p75) &POI_pp_telecom_elec <31.454 (p80) &POI_pp_mall_mkt <12.788 (p81)           | rate_local4 =0.141-0.802 (p14-78) | 98.86  | 0.78 | 20.84 | 0.08 | 5.531E-05 |
| prop_preprim_edu <0.133 (p84) &ave_household_size >2.577 (p17) &POI_pp_edu <15.808 (p69)          | rate_local4 =0.077-1.261 (p13-90) | 101.16 | 0.96 | 20.83 | 0.03 | 7.277E-05 |
| prop_business <0.043 (p85) &POI_pp_edu <16.667 (p69) &POI_pp_edu <15.808 (p69)                    | rate_local4 =0.130-0.987 (p14-85) | 110.72 | 0.86 | 20.81 | 0.05 | 1.533E-06 |
| gender_ratio >87.664 (p11) &ave_household_size >2.622 (p29) &POI_pp_edu <19.430 (p74)             | rate_local4 =0.072-0.894 (p13-81) | 93.60  | 0.87 | 20.80 | 0.03 | 8.129E-06 |
| gender_ratio >87.552 (p11) &ave_household_size >2.478 (p11) &POI_pp_telecom_elec <29.632 (p80)    | rate_local4 =0.124-0.871 (p14-80) | 105.83 | 0.82 | 20.77 | 0.03 | 5.806E-06 |
| gender_ratio >87.552 (p11) &den_bldg <0.323 (p76) &POI_pp_edu <21.469 (p79)                       | rate_local4 =0.074-0.862 (p13-80) | 94.34  | 0.85 | 20.72 | 0.03 | 5.601E-05 |
| prop_preprim_edu <0.138 (p85) &prop_business <0.055 (p86) &POI_pp_edu <16.401 (p69)               | rate_local4 =0.130-1.129 (p14-88) | 101.12 | 0.91 | 20.60 | 0.04 | 2.738E-05 |
| gender_ratio >87.533 (p11) &prop_business <0.058 (p86) &POI_pp_edu <19.430 (p74)                  | rate_local4 =0.124-0.871 (p14-80) | 103.71 | 0.82 | 20.43 | 0.02 | 1.845E-05 |
| den_bldg <0.311 (p75) &POI_pp_sports <33.191 (p70)                                                | rate_local4 =0.083-0.884 (p13-81) | 93.81  | 0.86 | 20.39 | 0.07 | 1.873E-05 |
| ave_household_size >2.659 (p29) &POI_pp_sports <37.538 (p75) &POI_pp_mall_mkt <13.767 (p82)       | rate_local4 =0.125-0.871 (p14-80) | 95.49  | 0.84 | 20.38 | 0.08 | 7.254E-06 |
| prop_preprim_edu <0.133 (p84) &POI_pp_edu <15.808 (p69) &POI_pp_mall_mkt <13.767 (p82)            | rate_local4 =0.077-1.261 (p13-90) | 117.26 | 0.93 | 20.35 | 0.03 | 3.944E-05 |
| prop_preprim_edu <0.144 (p89) &POI_pp_mall_mkt <8.043 (p64) &POI_pp_mall_mkt <13.767 (p82)        | rate_local4 =0.178-1.268 (p16-90) | 108.78 | 0.89 | 20.22 | 0.03 | 7.586E-05 |
| gender_ratio >87.664 (p11) &prop_business <0.058 (p86) &POI_pp_telecom_elec <38.005 (p86)         | rate_local4 =0.132-0.855 (p14-80) | 111.05 | 0.79 | 20.19 | 0.03 | 1.941E-05 |

|                                                                           |                                   |        |      |       |      |           |
|---------------------------------------------------------------------------|-----------------------------------|--------|------|-------|------|-----------|
| gender_ratio >87.552 (p11) &den_public_trans <59.812 (p84)                | rate_local4 =0.093-1.007 (p13-86) | 106.54 | 0.87 | 20.01 | 0.03 | 5.631E-05 |
| <b>221</b> &POI_pp_mall_mkt <11.259 (p75)                                 |                                   |        |      |       |      |           |
| <b>222</b> den_bldg <0.331 (p77) &POI_pp_edu <18.032 (p71)                | rate_local4 =0.075-0.893 (p13-81) | 97.26  | 0.85 | 20.00 | 0.07 | 2.433E-06 |
| prop_preprim_edu <0.138 (p85) &prop_business <0.055 (p86)                 |                                   |        |      |       |      |           |
| <b>223</b> &POI_pp_telecom_elec <40.063 (p87)                             | rate_local4 =0.130-1.129 (p14-88) | 119.06 | 0.87 | 19.73 | 0.04 | 4.165E-05 |
| prop_preprim_edu <0.139 (p86) &den_bldg <0.327 (p76)                      |                                   |        |      |       |      |           |
| <b>224</b> &POI_pp_mall_mkt <13.993 (p82)                                 | rate_local4 =0.130-0.835 (p14-79) | 88.22  | 0.82 | 19.65 | 0.04 | 8.07E-05  |
| gender_ratio >87.552 (p11) &ave_household_size >2.554 (p17)               |                                   |        |      |       |      |           |
| <b>225</b> &POI_pp_sports <51.798 (p85)                                   | rate_local4 =0.121-1.214 (p14-90) | 117.63 | 0.90 | 19.61 | 0.03 | 1.906E-05 |
| prop_preprim_edu <0.136 (p85) &den_bldg <0.302 (p74) &POI_pp_transport    |                                   |        |      |       |      |           |
| <b>226</b> <73.313 (p82)                                                  | rate_local4 =0.040-1.093 (p13-87) | 96.83  | 0.92 | 19.58 | 0.04 | 3.686E-05 |
| gender_ratio >87.329 (p11) &prop_preprim_edu <0.138 (p86)                 |                                   |        |      |       |      |           |
| <b>227</b> &ave_household_size >2.491 (p11)                               | rate_local4 =0.139-1.229 (p14-90) | 122.96 | 0.89 | 19.55 | 0.04 | 1.363E-07 |
| den_bldg <0.331 (p77) &POI_pp_telecom_elec <16.177 (p59)                  |                                   |        |      |       |      |           |
| <b>228</b> &POI_pp_mall_mkt <10.957 (p75)                                 | rate_local4 =0.053-1.094 (p13-87) | 89.21  | 0.94 | 19.54 | 0.01 | 2.266E-06 |
| gender_ratio >87.484 (p11) &prop_preprim_edu <0.149 (p90)                 |                                   |        |      |       |      |           |
| <b>229</b> &prop_business <0.043 (p85)                                    | rate_local4 =0.152-0.892 (p15-81) | 112.11 | 0.79 | 19.47 | 0.03 | 3.258E-05 |
| gender_ratio >87.533 (p11) &prop_business <0.058 (p86)                    |                                   |        |      |       |      |           |
| <b>230</b> &POI_pp_mall_mkt <17.630 (p86)                                 | rate_local4 =0.124-0.871 (p14-80) | 114.86 | 0.79 | 19.45 | 0.03 | 3.286E-05 |
| <b>231</b> prop_woodland >0.100 (p48) &POI_pp_transport <61.104 (p78)     | rate_local4 =0.119-0.854 (p14-80) | 78.39  | 0.87 | 19.34 | 0.11 | 4.325E-05 |
| <b>232</b> prop_preprim_edu <0.138 (p86) &den_road <17.068 (p72)          | rate_local4 =0.145-0.867 (p15-80) | 101.63 | 0.80 | 19.20 | 0.06 | 2.522E-06 |
| gender_ratio >87.552 (p11) &ave_household_size >2.602 (p29)               |                                   |        |      |       |      |           |
| <b>233</b> &POI_pp_mall_mkt <10.696 (p74)                                 | rate_local4 =0.126-0.963 (p14-84) | 93.13  | 0.86 | 19.08 | 0.02 | 1.489E-05 |
| gender_ratio >87.528 (p11) &prop_preprim_edu <0.146 (p89) &LU_entropy     |                                   |        |      |       |      |           |
| <b>234</b> >0.508 (p36)                                                   | rate_local4 =0.069-1.113 (p13-88) | 98.58  | 0.90 | 18.87 | 0.04 | 1.893E-07 |
| <b>235</b> prop_woodland >0.072 (p38) &POI_pp_sports <33.191 (p70)        | rate_local4 =0.119-0.888 (p14-81) | 80.89  | 0.87 | 18.82 | 0.09 | 2.517E-05 |
| <b>236</b> ave_household_size >2.627 (p29) &POI_pp_mall_mkt <12.788 (p81) | rate_local4 =0.152-0.892 (p15-81) | 100.45 | 0.81 | 18.70 | 0.07 | 5.27E-05  |
| den_bldg <0.331 (p77) &POI_pp_telecom_elec <16.177 (p59)                  |                                   |        |      |       |      |           |
| <b>237</b> &POI_pp_transport <39.095 (p61)                                | rate_local4 =0.040-1.093 (p13-87) | 84.80  | 0.94 | 18.66 | 0.01 | 2.567E-05 |
| <b>238</b> gender_ratio >87.552 (p11) &POI_pp_sports <38.723 (p76)        | rate_local4 =0.084-1.253 (p13-90) | 126.70 | 0.90 | 18.66 | 0.02 | 5.313E-05 |
| <b>239</b> prop_preprim_edu <0.152 (p91) &POI_pp_transport <29.486 (p52)  | rate_local4 =0.125-1.126 (p14-88) | 96.15  | 0.91 | 18.65 | 0.02 | 9.1E-06   |
| <b>240</b> gender_ratio >87.552 (p11) &POI_pp_edu <14.961 (p67)           | rate_local4 =0.084-1.253 (p13-90) | 115.85 | 0.91 | 18.64 | 0.02 | 8.192E-05 |
| <b>241</b> POI_pp_sports <33.191 (p70)                                    | rate_local4 =0.062-1.249 (p13-90) | 133.04 | 0.89 | 18.50 | 0.12 | 3.4E-12   |
| ave_household_size >2.683 (p29) &POI_pp_telecom_elec <17.911 (p64)        |                                   |        |      |       |      |           |
| <b>242</b> &POI_pp_mall_mkt <11.035 (p75)                                 | rate_local4 =0.075-1.088 (p13-87) | 85.52  | 0.93 | 18.40 | 0.01 | 7.588E-05 |

|                                                                                     |                                   |        |      |       |      |           |
|-------------------------------------------------------------------------------------|-----------------------------------|--------|------|-------|------|-----------|
| prop_preprim_edu <0.144 (p89) &ave_household_size >2.509 (p17)                      | rate_local4 =0.078-1.234 (p13-90) | 130.76 | 0.89 | 18.32 | 0.02 | 4.511E-05 |
| <b>243</b> &prop_household_3gen <0.081 (p92)                                        |                                   |        |      |       |      |           |
| <b>244</b> prop_preprim_edu <0.140 (p86) &den_public_trans <64.180 (p85)            | rate_local4 =0.152-0.892 (p15-81) | 118.61 | 0.77 | 18.20 | 0.05 | 5.411E-06 |
| <b>245</b> prop_business <0.060 (p87) &POI_pp_mall_mkt <14.399 (p83)                | rate_local4 =0.145-0.943 (p15-83) | 121.83 | 0.80 | 18.18 | 0.04 | 6.386E-05 |
| <b>246</b> prop_woodland >0.065 (p36) &POI_pp_telecom_elec <16.538 (p60)            | rate_local4 =0.088-0.877 (p13-80) | 72.87  | 0.88 | 17.95 | 0.10 | 2.292E-05 |
| <b>247</b> POI_pp_transport <68.907 (p80)                                           | rate_local4 =0.048-1.284 (p13-90) | 149.12 | 0.87 | 17.83 | 0.10 | 2.154E-14 |
| <b>248</b> prop_preprim_edu <0.138 (p85) &prop_business <0.050 (p86)                | rate_local4 =0.152-0.892 (p15-81) | 119.03 | 0.77 | 17.71 | 0.06 | 2.441E-05 |
| <b>249</b> gender_ratio >87.924 (p11) &LU_entropy >0.522 (p40)                      | rate_local4 =0.119-0.888 (p14-81) | 92.35  | 0.82 | 17.69 | 0.03 | 2.472E-05 |
| <b>250</b> prop_preprim_edu <0.149 (p90) &ave_household_size >2.627 (p29)           | rate_local4 =0.152-0.892 (p15-81) | 111.36 | 0.78 | 17.55 | 0.04 | 3.074E-05 |
| <b>251</b> prop_private_resid =0.013-0.123 (p30-70) &POI_pp_transport <66.085 (p78) | rate_local4 =0.124-0.575 (p14-62) | 51.61  | 0.70 | 17.55 | 0.09 | 3.873E-05 |
| <b>252</b> LU_entropy >0.548 (p47)                                                  | rate_local4 =0.140-0.863 (p14-80) | 90.44  | 0.80 | 17.54 | 0.15 | 3.552E-08 |
| <b>253</b> prop_woodland >0.065 (p36) &POI_pp_edu <19.430 (p74)                     | rate_local4 =0.050-0.879 (p13-81) | 85.14  | 0.84 | 17.50 | 0.08 | 6.634E-05 |
| <b>254</b> POI_pp_mall_mkt <6.232 (p55)                                             | rate_local4 =0.071-1.079 (p13-87) | 103.59 | 0.88 | 17.43 | 0.15 | 3.721E-08 |
| prop_private_resid =0.013-0.123 (p30-70) &POI_pp_telecom_elec <31.454 (p80)         | rate_local4 =0.124-0.575 (p14-62) | 51.03  | 0.69 | 17.28 | 0.09 | 8.372E-06 |
| <b>255</b> (p80)                                                                    |                                   |        |      |       |      |           |
| <b>256</b> gender_ratio >87.552 (p11) &POI_pp_mall_mkt <10.886 (p75)                | rate_local4 =0.080-0.857 (p13-80) | 108.46 | 0.78 | 17.19 | 0.03 | 7.21E-06  |
| prop_preprim_edu <0.136 (p85) &prop_household_3gen <0.081 (p92)                     | rate_local4 =0.078-1.234 (p13-90) | 124.09 | 0.88 | 16.97 | 0.02 | 6.113E-05 |
| <b>257</b> &prop_business <0.044 (p85)                                              |                                   |        |      |       |      |           |
| <b>258</b> gender_ratio >87.664 (p11) &ave_household_size >2.732 (p37)              | rate_local4 =0.132-0.855 (p14-80) | 95.82  | 0.79 | 16.87 | 0.04 | 1.574E-05 |
| <b>259</b> POI_pp_telecom_elec <30.272 (p80)                                        | rate_local4 =0.039-1.211 (p13-90) | 145.90 | 0.85 | 16.73 | 0.10 | 8.204E-12 |
| <b>260</b> ave_household_size >2.654 (p29) &prop_household_3gen <0.060 (p86)        | rate_local4 =0.062-0.869 (p13-80) | 100.40 | 0.78 | 16.68 | 0.05 | 5.797E-05 |
| <b>261</b> prop_grassland =0.004-0.085 (p23-71) &POI_pp_telecom_elec <26.772 (p77)  | rate_local4 =0.188-0.848 (p16-80) | 66.62  | 0.82 | 16.40 | 0.09 | 1.936E-05 |
| <b>262</b> prop_private_resid =0.008-0.104 (p26-66) &POI_pp_edu <16.203 (p69)       | rate_local4 =0.062-0.820 (p13-78) | 58.99  | 0.88 | 16.34 | 0.11 | 7.753E-05 |
| <b>263</b> prop_household_3gen <0.081 (p92) &den_public_trans <56.620 (p82)         | rate_local4 =0.156-0.860 (p15-80) | 116.83 | 0.73 | 15.92 | 0.03 | 3.957E-05 |
| <b>264</b> prop_household_3gen <0.052 (p81) &den_bldg <0.435 (p83)                  | rate_local4 =0.113-0.833 (p13-79) | 105.04 | 0.76 | 15.92 | 0.06 | 4.932E-05 |
| <b>265</b> prop_preprim_edu <0.149 (p90) &den_bldg <0.328 (p76)                     | rate_local4 =0.152-0.892 (p15-81) | 107.85 | 0.77 | 15.60 | 0.05 | 7.199E-05 |
| <b>266</b> prop_grassland =0.007-0.073 (p30-69) &POI_pp_mall_mkt <9.685 (p69)       | rate_local4 =0.218-1.005 (p21-86) | 52.57  | 0.91 | 15.51 | 0.15 | 1.497E-05 |
| <b>267</b> den_road <16.676 (p72) &prop_transport >0.067 (p35)                      | rate_local4 =0.178-1.014 (p16-86) | 70.86  | 0.87 | 15.30 | 0.12 | 6.16E-06  |
| <b>268</b> prop_business <0.060 (p87) &prop_transport >0.067 (p35)                  | rate_local4 =0.184-1.158 (p16-89) | 94.98  | 0.84 | 15.23 | 0.09 | 3.549E-05 |
| <b>269</b> prop_grassland =0.007-0.073 (p30-69) &POI_pp_transport <42.169 (p64)     | rate_local4 =0.218-1.005 (p21-86) | 50.86  | 0.91 | 15.09 | 0.15 | 5.184E-05 |

|     |                                                                    |                                   |        |      |       |      |           |
|-----|--------------------------------------------------------------------|-----------------------------------|--------|------|-------|------|-----------|
| 270 | gender_ratio >87.664 (p11) &den_road <23.313 (p87)                 | rate_local4 =0.132-0.855 (p14-80) | 119.41 | 0.74 | 14.92 | 0.04 | 3.003E-05 |
| 271 | POI_pp_edu <5.310 (p35)                                            | rate_local4 =0.197-0.642 (p16-65) | 48.35  | 0.68 | 14.66 | 0.21 | 2.402E-05 |
| 272 | prop_grassland =0.007-0.073 (p30-69) &POI_pp_sports <43.022 (p80)  | rate_local4 =0.218-1.005 (p21-86) | 55.78  | 0.87 | 14.58 | 0.11 | 7.826E-05 |
| 273 | gender_ratio >87.552 (p11) &prop_business <0.055 (p86)             | rate_local4 =0.124-0.871 (p14-80) | 121.86 | 0.75 | 14.36 | 0.03 | 6.16E-06  |
| 274 | prop_transport >0.104 (p44) &LU_entropy >0.535 (p43)               | rate_local4 =0.170-1.002 (p16-86) | 59.50  | 0.88 | 14.12 | 0.08 | 2.237E-05 |
| 275 | ave_household_size >2.713 (p37)                                    | rate_local4 =0.119-0.865 (p14-80) | 106.31 | 0.76 | 14.06 | 0.10 | 4.393E-07 |
| 276 | prop_household_3gen <0.081 (p92) &den_road <15.967 (p70)           | rate_local4 =0.142-0.793 (p14-77) | 93.08  | 0.72 | 13.83 | 0.04 | 7.901E-05 |
| 277 | gender_ratio >87.277 (p11) &prop_preprim_edu <0.128 (p82)          | rate_local4 =0.083-1.256 (p13-90) | 131.00 | 0.85 | 13.68 | 0.04 | 1.048E-05 |
| 278 | prop_grassland <0.027 (p51) &LU_entropy >0.551 (p49)               | rate_local4 =0.305-0.905 (p29-81) | 37.33  | 0.79 | 13.04 | 0.17 | 4.997E-05 |
| 279 | prop_transport =0.035-0.151 (p25-57)                               | rate_local4 =0.186-0.534 (p16-56) | 39.08  | 0.57 | 12.25 | 0.18 | 2.687E-06 |
| 280 | prop_preprim_edu <0.136 (p85) &prop_household_3gen <0.081 (p92)    | rate_local4 =0.078-1.234 (p13-90) | 140.09 | 0.83 | 12.04 | 0.03 | 4.293E-05 |
| 281 | prop_grassland =0.004-0.085 (p23-71)                               | rate_local4 =0.188-0.848 (p16-80) | 72.91  | 0.73 | 11.18 | 0.11 | 7.233E-05 |
| 282 | prop_private_resid =0.022-0.087 (p36-64)                           | rate_local4 =0.117-0.731 (p14-73) | 43.28  | 0.77 | 10.72 | 0.19 | 7.179E-06 |
| 283 | prop_publicResid >0.042 (p70)                                      | rate_local4 =0.168-1.073 (p16-87) | 56.16  | 0.86 | 10.24 | 0.16 | 3.66E-05  |
| 284 | prop_preprim_edu <0.134 (p84)                                      | rate_local4 =0.081-1.273 (p13-90) | 147.41 | 0.82 | 9.14  | 0.05 | 8.833E-06 |
| 285 | prop_woodland <0.016 (p25)                                         | rate_local4 =0.744-1.282 (p74-90) | 18.16  | 0.34 | 9.13  | 0.17 | 3.327E-05 |
| 286 | prop_gov_insti_faci >0.033 (p43)                                   | rate_local4 =0.027-1.271 (p13-90) | 103.73 | 0.84 | 8.92  | 0.07 | 6.359E-05 |
| 287 | prop_household_3gen <0.081 (p92)                                   | rate_local4 =0.041-1.292 (p13-90) | 158.15 | 0.81 | 7.35  | 0.04 | 1.62E-06  |
| 288 | den_road <20.368 (p81) &den_public_trans <47.014 (p78)             | rate_local4 <0.727 (p73)          | 131.03 | 0.86 | 21.34 | 0.04 | 5.871E-08 |
| 289 | den_road <16.383 (p71)                                             | rate_local4 <0.722 (p72)          | 128.58 | 0.84 | 19.36 | 0.13 | 4.628E-12 |
| 290 | den_population <37522.136 (p69) &prop_business <0.036 (p83)        | rate_local4 <0.727 (p73)          | 113.33 | 0.87 | 18.94 | 0.04 | 1.498E-06 |
| 291 | den_population <36962.203 (p68) &den_public_trans <32.715 (p66)    | rate_local4 <0.716 (p71)          | 105.49 | 0.87 | 18.91 | 0.04 | 3.106E-05 |
| 292 | den_bldg <0.226 (p62)                                              | rate_local4 <0.603 (p64)          | 99.30  | 0.76 | 18.44 | 0.14 | 3.089E-07 |
| 293 | den_population <8644.075 (p40) &POI_pp_sports >29.162 (p66)        | rate_local4 <0.070 (p13)          | 23.55  | 0.53 | 17.73 | 0.20 | 5.63E-06  |
| 294 | den_population <26219.620 (p60)                                    | rate_local4 <0.466 (p46)          | 75.80  | 0.61 | 16.78 | 0.14 | 1.213E-06 |
| 295 | den_population <8644.075 (p40) &POI_pp_transport >54.345 (p73)     | rate_local4 <0.053 (p13)          | 21.67  | 0.56 | 16.63 | 0.20 | 7.284E-06 |
| 296 | den_population <11819.200 (p43) &POI_pp_telecom_elec >17.798 (p64) | rate_local4 <0.080 (p13)          | 22.86  | 0.43 | 15.95 | 0.13 | 4.768E-05 |
| 297 | prop_shrubland >0.064 (p49)                                        | rate_local4 <0.785 (p76)          | 101.16 | 0.90 | 15.67 | 0.14 | 2.934E-07 |
| 298 | den_population <8644.075 (p40) &POI_pp_edu >16.779 (p69)           | rate_local4 <0.035 (p13)          | 20.53  | 0.54 | 15.55 | 0.21 | 4.103E-05 |
| 299 | prop_private_resid <0.069 (p57) &prop_publicResid <0.039 (p70)     | rate_local4 <0.191 (p16)          | 29.04  | 0.36 | 15.42 | 0.11 | 1.535E-05 |
| 300 | den_public_trans <46.130 (p78)                                     | rate_local4 <0.780 (p76)          | 136.41 | 0.85 | 15.26 | 0.10 | 4.312E-10 |
| 301 | den_population <8644.075 (p40) &POI_pp_mall_mkt >9.300 (p66)       | rate_local4 <0.058 (p13)          | 19.87  | 0.55 | 15.16 | 0.22 | 4.103E-05 |
| 302 | prop_private_resid <0.025 (p39) &POI_pp_sports >25.381 (p62)       | rate_local4 <0.072 (p13)          | 20.28  | 0.50 | 15.01 | 0.21 | 1.012E-05 |
| 303 | prop_woodland =0.016-0.309 (p25-81)                                | rate_local4 <0.744 (p74)          | 100.70 | 0.86 | 14.25 | 0.12 | 1.391E-06 |
| 304 | POI_pp_sports >33.191 (p70)                                        | rate_local4 <0.062 (p13)          | 22.58  | 0.35 | 14.17 | 0.22 | 8.477E-12 |

|                                                                              |                          |        |      |       |      |           |
|------------------------------------------------------------------------------|--------------------------|--------|------|-------|------|-----------|
| <b>305</b> POI_pp_telecom_elec >30.272 (p80)                                 | rate_local4 <0.039 (p13) | 19.74  | 0.45 | 14.04 | 0.32 | 3.555E-13 |
| <b>306</b> POI_pp_transport >68.907 (p80)                                    | rate_local4 <0.048 (p13) | 19.71  | 0.45 | 14.01 | 0.32 | 7.438E-15 |
| <b>307</b> den_bldg <0.160 (p47) &POI_pp_mall_mkt >7.205 (p60)               | rate_local4 <0.075 (p13) | 19.21  | 0.48 | 14.00 | 0.23 | 2.826E-06 |
| <b>308</b> prop_agricultural >0.017 (p64)                                    | rate_local4 <0.430 (p43) | 46.73  | 0.61 | 13.80 | 0.18 | 5.866E-06 |
| <b>309</b> prop_private_resid <0.025 (p39) &POI_pp_mall_mkt >7.305 (p60)     | rate_local4 <0.148 (p15) | 18.82  | 0.51 | 13.44 | 0.21 | 7.541E-06 |
| <b>310</b> prop_business <0.058 (p86)                                        | rate_local4 <0.784 (p76) | 152.27 | 0.82 | 11.69 | 0.06 | 1.455E-08 |
| <b>311</b> prop_private_resid <0.022 (p36)                                   | rate_local4 <0.117 (p14) | 22.60  | 0.29 | 11.64 | 0.15 | 2.503E-08 |
| <b>312</b> prop_transport <0.035 (p25)                                       | rate_local4 <0.186 (p16) | 20.05  | 0.39 | 11.58 | 0.22 | 8.801E-07 |
| <b>313</b> prop_rural_set >0.032 (p69)                                       | rate_local4 <0.348 (p36) | 35.01  | 0.51 | 10.90 | 0.16 | 6.869E-05 |
| <b>314</b> prop_household_3gen >0.052 (p81) &den_population <11819.200 (p43) | rate_local4 <0.080 (p13) | 14.30  | 0.54 | 10.86 | 0.21 | 2.837E-05 |
| <b>315</b> POI_pp_edu >25.063 (p83)                                          | rate_local4 <0.061 (p13) | 15.92  | 0.40 | 10.72 | 0.27 | 2.209E-09 |
| <b>316</b> prop_rural_set >0.032 (p69) &POI_pp_sports >19.775 (p53)          | rate_local4 <0.062 (p13) | 14.85  | 0.45 | 10.52 | 0.20 | 6.233E-05 |
| <b>317</b> prop_gov_insti_faci <0.033 (p43)                                  | rate_local4 <0.027 (p13) | 21.99  | 0.24 | 10.15 | 0.11 | 9.447E-06 |
| <b>318</b> prop_open_recreation <0.006 (p25)                                 | rate_local4 <0.065 (p13) | 16.70  | 0.32 | 9.76  | 0.18 | 2.281E-06 |
| <b>319</b> med_area_home >15.641 (p45)                                       | rate_local4 <0.299 (p29) | 45.56  | 0.37 | 9.68  | 0.08 | 7.299E-05 |
| <b>320</b> build_area_pp >58.100 (p47)                                       | rate_local4 <0.222 (p21) | 36.65  | 0.31 | 9.66  | 0.08 | 1.522E-05 |
| <b>321</b> prop_grassland >0.085 (p71)                                       | rate_local4 <0.188 (p16) | 20.40  | 0.32 | 9.55  | 0.15 | 6.504E-06 |
| <b>322</b> prop_rural_set >0.024 (p65) &POI_pp_mall_mkt >10.138 (p71)        | rate_local4 <0.067 (p13) | 11.97  | 0.64 | 9.51  | 0.33 | 3.838E-05 |
| <b>323</b> POI_pp_mall_mkt >19.264 (p88)                                     | rate_local4 <0.071 (p13) | 12.77  | 0.48 | 9.31  | 0.35 | 2.595E-09 |
| <b>324</b> prop_publicResid <0.042 (p70)                                     | rate_local4 <0.168 (p16) | 32.56  | 0.22 | 8.66  | 0.06 | 3.282E-05 |
| <b>325</b> prop_preprim_edu >0.156 (p92)                                     | rate_local4 <0.081 (p13) | 11.00  | 0.60 | 8.62  | 0.47 | 2.726E-10 |
| <b>326</b> prop_household_3gen >0.081 (p92)                                  | rate_local4 <0.041 (p13) | 10.67  | 0.59 | 8.30  | 0.46 | 4.761E-11 |
| <b>327</b> prop_over65 >0.229 (p93)                                          | rate_local4 <0.299 (p29) | 11.05  | 0.78 | 6.81  | 0.48 | 2.318E-05 |
| <b>328</b> gender_ratio >109.623 (p94)                                       | rate_local4 <0.334 (p34) | 10.16  | 0.79 | 5.84  | 0.45 | 5.987E-05 |
| <b>329</b> gender_ratio <87.552 (p11) &prop_grassland >0.070 (p67)           | rate_local4 <0.078 (p13) | 6.00   | 0.98 | 5.20  | 0.69 | 1.336E-05 |
| <b>330</b> gender_ratio <86.999 (p11) &den_population <11819.200 (p43)       | rate_local4 <0.089 (p13) | 6.25   | 0.77 | 5.19  | 0.47 | 3.162E-05 |
| <b>331</b> gender_ratio <87.087 (p11) &den_public_trans <6.868 (p34)         | rate_local4 <0.032 (p13) | 5.56   | 0.94 | 4.79  | 0.65 | 5.737E-05 |
| <b>332</b> gender_ratio <87.552 (p11) &den_bldg <0.112 (p36)                 | rate_local4 <0.078 (p13) | 5.47   | 0.98 | 4.74  | 0.69 | 4.75E-05  |

(e) Rules for wave-3 local case rate, excluding cases in the Dancing/Singing Cluster; POI accessibility was used

| No. | Antecedent                                                                               | Consequent                       | Supp  | Conf | Lev   | Imp  | P       |
|-----|------------------------------------------------------------------------------------------|----------------------------------|-------|------|-------|------|---------|
| 1   | med_income <23893.698 (p79) &prop_rural_set <0.020 (p64) &prop_shrubland <0.106 (p57)    | rate_local4nondance >0.421 (p58) | 50.22 | 0.79 | 22.55 | 0.14 | 7E-07   |
| 2   | med_income <26997.433 (p83) &prop_agricultural <0.018 (p64) &prop_shrubland <0.106 (p57) | rate_local4nondance >0.417 (p58) | 56.31 | 0.72 | 22.15 | 0.09 | 1.9E-05 |
| 3   | med_income <27021.574 (p84) &prop_rural_set <0.014 (p59) &prop_transport >0.089 (p39)    | rate_local4nondance >0.352 (p48) | 59.83 | 0.83 | 21.69 | 0.10 | 5.3E-05 |
| 4   | med_income <27548.320 (p84) &den_road >7.805 (p37) &prop_agricultural <0.024 (p71)       | rate_local4nondance >0.339 (p44) | 70.57 | 0.78 | 21.45 | 0.07 | 3.1E-05 |
| 5   | med_income <26534.581 (p83) &prop_rural_set <0.020 (p64) &prop_grassland <0.048 (p61)    | rate_local4nondance >0.421 (p58) | 51.93 | 0.73 | 21.24 | 0.12 | 5.6E-05 |
| 6   | med_income <27021.574 (p84) &den_road >7.987 (p38) &prop_rural_set <0.032 (p69)          | rate_local4nondance >0.352 (p48) | 62.75 | 0.80 | 21.21 | 0.10 | 3.1E-05 |
| 7   | prop_higher_edu <0.354 (p84) &prop_rural_set <0.018 (p63) &prop_shrubland <0.114 (p58)   | rate_local4nondance >0.385 (p52) | 53.12 | 0.80 | 21.19 | 0.12 | 2.4E-05 |
| 8   | med_income <23378.274 (p78) &prop_transport >0.130 (p52) &prop_agricultural <0.012 (p60) | rate_local4nondance >0.338 (p44) | 58.69 | 0.85 | 21.01 | 0.07 | 8.3E-05 |
| 9   | med_income <28521.509 (p84) &den_bldg >0.118 (p38) &prop_shrubland <0.131 (p64)          | rate_local4nondance >0.342 (p45) | 71.66 | 0.76 | 20.96 | 0.06 | 1.6E-05 |
| 10  | med_income <28309.145 (p84) &den_public_trans >17.077 (p50) &prop_shrubland <0.107 (p57) | rate_local4nondance >0.408 (p56) | 55.63 | 0.72 | 20.96 | 0.08 | 7.9E-05 |
| 11  | med_income <28532.667 (p84) &prop_transport >0.140 (p54)                                 | rate_local4nondance >0.412 (p57) | 57.31 | 0.70 | 20.80 | 0.08 | 6.8E-05 |
| 12  | med_income <23455.266 (p78) &den_bldg >0.180 (p51)                                       | rate_local4nondance >0.411 (p57) | 54.28 | 0.72 | 20.67 | 0.12 | 7.1E-07 |
| 13  | med_income <24026.190 (p79) &prop_rural_set <0.002 (p49)                                 | rate_local4nondance >0.397 (p54) | 54.12 | 0.75 | 20.39 | 0.14 | 1.3E-05 |
| 14  | med_area_home <17.602 (p54) &prop_rural_set <0.012 (p59)                                 | rate_local4nondance >0.396 (p53) | 56.33 | 0.73 | 20.34 | 0.14 | 1.2E-05 |
| 15  | med_income <24039.820 (p79) &den_road >11.532 (p53)                                      | rate_local4nondance >0.421 (p58) | 52.05 | 0.71 | 20.14 | 0.12 | 3E-06   |
| 16  | med_income <23493.899 (p78) &prop_agricultural <0.000 (p40)                              | rate_local4nondance >0.411 (p57) | 46.02 | 0.78 | 19.88 | 0.16 | 3.5E-07 |
| 17  | den_population >18758.717 (p50) &prop_agricultural <0.016 (p64)                          | rate_local4nondance >0.348 (p47) | 69.20 | 0.75 | 19.73 | 0.05 | 4.8E-05 |
| 18  | med_area_home <18.912 (p57) &prop_rural_set <0.018 (p63) &prop_shrubland <0.104 (p56)    | rate_local4nondance >0.348 (p46) | 52.19 | 0.86 | 19.66 | 0.11 | 8.2E-05 |
| 19  | med_income <26688.145 (p83) &den_road >7.671 (p36) &prop_shrubland <0.145 (p67)          | rate_local4nondance >0.342 (p45) | 70.54 | 0.75 | 19.65 | 0.04 | 3.2E-05 |
| 20  | med_income <27897.286 (p84) &prop_grassland <0.035 (p58)                                 | rate_local4nondance >0.400 (p55) | 64.71 | 0.66 | 19.46 | 0.08 | 5.9E-05 |
| 21  | med_area_home <17.602 (p54) &prop_agricultural <0.014 (p61)                              | rate_local4nondance >0.363 (p49) | 63.10 | 0.74 | 19.33 | 0.10 | 4.4E-05 |

|    |                                                                                            |                                  |       |      |       |      |         |
|----|--------------------------------------------------------------------------------------------|----------------------------------|-------|------|-------|------|---------|
| 22 | med_income <23893.698 (p79) &prop_transport >0.056 (p33) &LU_entropy <0.546 (p47)          | rate_local4nondance >0.621 (p74) | 30.15 | 0.71 | 19.29 | 0.17 | 5.1E-05 |
| 23 | prop_higher_edu <0.342 (p81) &den_road >11.532 (p53) &prop_rural_set <0.010 (p59)          | rate_local4nondance >0.421 (p58) | 44.45 | 0.76 | 19.29 | 0.09 | 6.4E-05 |
| 24 | med_income <23361.519 (p78) &den_road >6.327 (p30) &LU_entropy <0.538 (p44)                | rate_local4nondance >0.596 (p74) | 29.78 | 0.75 | 19.05 | 0.21 | 1.7E-06 |
| 25 | med_area_home <18.088 (p55) &den_bldg >0.187 (p53)                                         | rate_local4nondance >0.421 (p58) | 47.62 | 0.72 | 19.04 | 0.12 | 5.7E-06 |
| 26 | prop_rural_set <0.035 (p70) &prop_shrubland <0.104 (p56)                                   | rate_local4nondance >0.343 (p46) | 68.19 | 0.75 | 18.94 | 0.08 | 3.1E-05 |
| 27 | prop_transport >0.116 (p50) &LU_entropy <0.550 (p49)                                       | rate_local4nondance >0.674 (p77) | 31.51 | 0.58 | 18.91 | 0.23 | 6.6E-07 |
| 28 | med_income <28202.741 (p84) &den_public_trans >23.601 (p57)                                | rate_local4nondance >0.357 (p48) | 60.54 | 0.76 | 18.85 | 0.06 | 4.8E-05 |
| 29 | med_area_home <18.912 (p57) &prop_shrubland <0.104 (p56)                                   | rate_local4nondance >0.417 (p58) | 54.20 | 0.67 | 18.67 | 0.10 | 7E-05   |
| 30 | den_road >9.857 (p46) &LU_entropy <0.551 (p49)                                             | rate_local4nondance >0.687 (p78) | 31.83 | 0.54 | 18.64 | 0.20 | 6.9E-06 |
| 31 | prop_household_3gen <0.081 (p92) &med_area_home <17.219 (p52) &prop_rural_set <0.041 (p71) | rate_local4nondance >0.263 (p35) | 72.22 | 0.87 | 18.63 | 0.03 | 3.5E-05 |
| 32 | den_population >18148.394 (p50) &prop_rural_set <0.041 (p71)                               | rate_local4nondance >0.263 (p35) | 78.68 | 0.84 | 18.60 | 0.04 | 4.6E-05 |
| 33 | prop_agricultural <0.028 (p73) &POI_pp_telecom_elec <20.290 (p69)                          | rate_local4nondance >0.234 (p31) | 95.14 | 0.84 | 18.54 | 0.06 | 5E-05   |
| 34 | med_income <23361.519 (p78) &prop_agricultural <0.009 (p58) &LU_entropy <0.547 (p47)       | rate_local4nondance >0.623 (p74) | 29.97 | 0.67 | 18.54 | 0.19 | 5.8E-06 |
| 35 | med_income <27081.831 (p84) &med_area_home <18.198 (p55) &prop_rural_set <0.012 (p59)      | rate_local4nondance >0.259 (p35) | 68.92 | 0.89 | 18.50 | 0.02 | 4.1E-05 |
| 36 | med_income <28202.741 (p84) &prop_shrubland <0.071 (p50)                                   | rate_local4nondance >0.406 (p56) | 57.96 | 0.66 | 18.45 | 0.08 | 3.4E-05 |
| 37 | med_income <23361.519 (p78) &den_bldg >0.144 (p43) &LU_entropy <0.538 (p44)                | rate_local4nondance >0.596 (p74) | 28.51 | 0.76 | 18.40 | 0.19 | 1.1E-05 |
| 38 | den_bldg >0.158 (p47) &LU_entropy <0.550 (p49)                                             | rate_local4nondance >0.684 (p78) | 31.81 | 0.54 | 18.40 | 0.18 | 3.1E-05 |
| 39 | med_area_home <17.981 (p55) &prop_grassland <0.022 (p46) &LU_entropy <0.550 (p49)          | rate_local4nondance >0.711 (p79) | 25.42 | 0.77 | 18.33 | 0.20 | 4.1E-05 |
| 40 | ave_household_size <2.963 (p63) &prop_rural_set <0.004 (p51) &LU_entropy <0.555 (p50)      | rate_local4nondance >0.647 (p76) | 30.06 | 0.62 | 18.30 | 0.14 | 8.2E-05 |
| 41 | med_income <23361.519 (p78) &prop_grassland <0.040 (p59) &LU_entropy <0.538 (p44)          | rate_local4nondance >0.596 (p74) | 29.38 | 0.71 | 18.30 | 0.18 | 9.6E-06 |
| 42 | prop_higher_edu <0.346 (p82) &prop_rural_set <0.000 (p43)                                  | rate_local4nondance >0.389 (p53) | 48.36 | 0.76 | 18.27 | 0.14 | 2.4E-05 |
| 43 | med_area_home <17.728 (p54) &den_road >11.019 (p51)                                        | rate_local4nondance >0.426 (p59) | 48.39 | 0.69 | 18.27 | 0.11 | 7E-05   |
| 44 | den_population >19719.011 (p51) &LU_entropy <0.550 (p49)                                   | rate_local4nondance >0.691 (p78) | 28.99 | 0.60 | 18.20 | 0.24 | 3.2E-07 |

|    |                                                                                              |                                  |        |      |       |      |         |
|----|----------------------------------------------------------------------------------------------|----------------------------------|--------|------|-------|------|---------|
| 45 | den_population >26714.031 (p60) &prop_agricultural <0.015 (p62) &prop_shrubland <0.123 (p61) | rate_local4nondance >0.297 (p37) | 59.67  | 0.84 | 18.20 | 0.03 | 1.1E-05 |
| 46 | prop_grassland <0.025 (p50) &LU_entropy <0.550 (p49)                                         | rate_local4nondance >0.652 (p76) | 32.64  | 0.54 | 18.17 | 0.18 | 4.8E-06 |
| 47 | den_population >26714.031 (p60) &prop_shrubland <0.123 (p61)                                 | rate_local4nondance >0.284 (p37) | 66.15  | 0.85 | 18.13 | 0.03 | 3.7E-05 |
| 48 | med_income <23361.519 (p78) &prop_shrubland <0.115 (p58) &LU_entropy <0.538 (p44)            | rate_local4nondance >0.596 (p74) | 28.93  | 0.72 | 18.05 | 0.17 | 2.5E-05 |
| 49 | prop_agricultural <0.035 (p75) &POI_pp_transport <50.430 (p71)                               | rate_local4nondance >0.234 (p31) | 96.23  | 0.83 | 18.02 | 0.07 | 3.1E-06 |
| 50 | den_population >31290.715 (p63) &den_bldg >0.179 (p51)                                       | rate_local4nondance >0.447 (p61) | 44.12  | 0.68 | 18.01 | 0.06 | 5.3E-05 |
| 51 | med_area_home <17.981 (p55) &prop_shrubland <0.122 (p60) &LU_entropy <0.550 (p49)            | rate_local4nondance >0.716 (p79) | 25.15  | 0.75 | 17.98 | 0.18 | 4.9E-05 |
| 52 | med_area_home <17.981 (p55) &den_bldg >0.140 (p43) &LU_entropy <0.550 (p49)                  | rate_local4nondance >0.623 (p74) | 26.70  | 0.78 | 17.95 | 0.17 | 5.4E-05 |
| 53 | med_income <21465.840 (p75) &prop_rural_set <0.004 (p51) &LU_entropy <0.550 (p49)            | rate_local4nondance >0.615 (p74) | 28.12  | 0.72 | 17.94 | 0.21 | 1.1E-05 |
| 54 | prop_higher_edu <0.342 (p81) &den_road >11.532 (p53)                                         | rate_local4nondance >0.421 (p58) | 49.83  | 0.68 | 17.91 | 0.09 | 2.4E-05 |
| 55 | prop_rural_set <0.055 (p75) &prop_transport >0.062 (p35)                                     | rate_local4nondance >0.292 (p37) | 89.28  | 0.76 | 17.81 | 0.06 | 6.2E-05 |
| 56 | prop_shrubland <0.021 (p37) &LU_entropy <0.545 (p46)                                         | rate_local4nondance >0.642 (p76) | 30.47  | 0.59 | 17.81 | 0.17 | 3.4E-07 |
| 57 | prop_preprim_edu <0.156 (p92) &med_area_home <17.524 (p53) &prop_agricultural <0.015 (p62)   | rate_local4nondance >0.221 (p30) | 75.59  | 0.90 | 17.76 | 0.02 | 3.1E-06 |
| 58 | den_population >26428.002 (p60)                                                              | rate_local4nondance >0.376 (p51) | 62.01  | 0.69 | 17.69 | 0.20 | 3.2E-07 |
| 59 | prop_rural_set <0.037 (p70) &POI_pp_telecom_elec <20.290 (p69)                               | rate_local4nondance >0.258 (p35) | 86.12  | 0.82 | 17.66 | 0.07 | 2.1E-05 |
| 60 | prop_woodland <0.072 (p38) &LU_entropy <0.543 (p46)                                          | rate_local4nondance >0.656 (p76) | 29.67  | 0.59 | 17.62 | 0.18 | 2.4E-06 |
| 61 | prop_higher_edu <0.346 (p82) &prop_agricultural <0.002 (p46)                                 | rate_local4nondance >0.418 (p58) | 48.65  | 0.68 | 17.58 | 0.11 | 1.8E-05 |
| 62 | med_area_home <17.610 (p54) &den_road >11.808 (p55) &LU_entropy <0.541 (p45)                 | rate_local4nondance >0.738 (p79) | 23.76  | 0.77 | 17.51 | 0.19 | 4E-05   |
| 63 | prop_higher_edu <0.338 (p81) &med_area_home <18.198 (p55) &prop_rural_set <0.012 (p59)       | rate_local4nondance >0.253 (p34) | 66.46  | 0.89 | 17.49 | 0.02 | 3.5E-05 |
| 64 | build_area_pp <73.548 (p54) &prop_rural_set <0.044 (p73) &POI_pp_transport <50.430 (p71)     | rate_local4nondance >0.234 (p31) | 67.87  | 0.91 | 17.48 | 0.05 | 4.8E-05 |
| 65 | prop_higher_edu <0.342 (p81) &den_road >9.857 (p46) &LU_entropy <0.551 (p49)                 | rate_local4nondance >0.760 (p80) | 24.71  | 0.66 | 17.46 | 0.16 | 4E-05   |
| 66 | prop_preprim_edu <0.123 (p80) &POI_pp_transport <45.027 (p69)                                | rate_local4nondance >0.172 (p26) | 103.99 | 0.88 | 17.34 | 0.05 | 7.9E-06 |



|           |                                                                                                |                                  |        |      |       |      |         |
|-----------|------------------------------------------------------------------------------------------------|----------------------------------|--------|------|-------|------|---------|
| <b>67</b> | prop_rural_set <0.044 (p73) &POI_pp_transport <50.430 (p71)                                    | rate_local4nondance >0.234 (p31) | 90.88  | 0.84 | 17.32 | 0.08 | 2.8E-05 |
| <b>68</b> | med_area_home <18.503 (p56) &prop_transport >0.090 (p39)<br>&LU_entropy <0.537 (p44)           | rate_local4nondance >0.721 (p79) | 24.18  | 0.74 | 17.27 | 0.17 | 7.7E-05 |
| <b>69</b> | prop_preprim_edu <0.153 (p91) &med_area_home <17.090 (p52)                                     | rate_local4nondance >0.314 (p40) | 76.10  | 0.75 | 17.20 | 0.05 | 6.4E-05 |
| <b>70</b> | prop_transport >0.143 (p55)                                                                    | rate_local4nondance >0.419 (p58) | 59.22  | 0.61 | 17.17 | 0.18 | 9.2E-08 |
| <b>71</b> | med_area_home <18.503 (p56) &den_population >15207.279 (p47)<br>&LU_entropy <0.555 (p50)       | rate_local4nondance >0.781 (p82) | 23.93  | 0.64 | 17.06 | 0.14 | 2.1E-05 |
| <b>72</b> | build_area_pp <89.773 (p62) &prop_rural_set <0.078 (p82)<br>&prop_transport >0.062 (p35)       | rate_local4nondance >0.202 (p27) | 75.22  | 0.92 | 17.05 | 0.06 | 1.1E-05 |
| <b>73</b> | med_area_home <18.727 (p57) &prop_woodland <0.064 (p36)<br>&LU_entropy <0.543 (p46)            | rate_local4nondance >0.656 (p76) | 24.79  | 0.76 | 17.04 | 0.17 | 4.7E-05 |
| <b>74</b> | prop_rural_set <0.003 (p50) &LU_entropy <0.550 (p49)                                           | rate_local4nondance >0.710 (p79) | 31.06  | 0.48 | 17.03 | 0.14 | 4.1E-05 |
| <b>75</b> | build_area_pp <89.773 (p62) &prop_rural_set <0.067 (p80)<br>&prop_agricultural <0.013 (p61)    | rate_local4nondance >0.207 (p29) | 72.28  | 0.92 | 16.90 | 0.02 | 1.4E-05 |
| <b>76</b> | build_area_pp <57.599 (p46) &prop_agricultural <0.009 (p59)                                    | rate_local4nondance >0.284 (p37) | 57.58  | 0.87 | 16.89 | 0.12 | 1.6E-05 |
| <b>77</b> | prop_transport >0.148 (p55) &prop_agricultural <0.028 (p73)                                    | rate_local4nondance >0.296 (p37) | 69.77  | 0.78 | 16.66 | 0.02 | 5.6E-05 |
| <b>78</b> | den_road >6.756 (p31) &build_area_pp <87.950 (p62)<br>&prop_rural_set <0.052 (p75)             | rate_local4nondance >0.189 (p27) | 69.90  | 0.94 | 16.65 | 0.07 | 2.1E-07 |
| <b>79</b> | med_area_home <16.629 (p50) &LU_entropy <0.550 (p49)                                           | rate_local4nondance >0.607 (p74) | 27.40  | 0.67 | 16.65 | 0.29 | 1.7E-07 |
| <b>80</b> | med_area_home <17.728 (p54) &den_road >7.987 (p38)<br>&prop_rural_set <0.049 (p74)             | rate_local4nondance >0.235 (p31) | 65.45  | 0.91 | 16.64 | 0.06 | 2.3E-05 |
| <b>81</b> | prop_preprim_edu <0.123 (p80) &POI_pp_sports <37.106 (p74)                                     | rate_local4nondance >0.172 (p26) | 113.01 | 0.86 | 16.53 | 0.04 | 2.6E-05 |
| <b>82</b> | build_area_pp <84.798 (p59) &prop_rural_set <0.039 (p71)<br>&POI_pp_telecom_elec <29.624 (p80) | rate_local4nondance >0.198 (p27) | 75.65  | 0.91 | 16.46 | 0.04 | 7.3E-05 |
| <b>83</b> | prop_over65 <0.212 (p89) &med_area_home <17.531 (p53)                                          | rate_local4nondance >0.294 (p37) | 74.90  | 0.77 | 16.46 | 0.06 | 3E-05   |
| <b>84</b> | prop_preprim_edu <0.144 (p89) &med_area_home <17.727 (p54)<br>&POI_pp_edu <24.537 (p82)        | rate_local4nondance >0.172 (p26) | 84.61  | 0.91 | 16.46 | 0.03 | 5E-05   |
| <b>85</b> | prop_preprim_edu <0.144 (p89) &med_area_home <17.727 (p54)<br>&POI_pp_mall_mkt <10.119 (p71)   | rate_local4nondance >0.172 (p26) | 80.32  | 0.92 | 16.41 | 0.04 | 7.7E-05 |
| <b>86</b> | prop_grassland <0.001 (p17)                                                                    | rate_local4nondance >0.693 (p78) | 24.54  | 0.67 | 16.40 | 0.45 | 1.7E-13 |
| <b>87</b> | med_area_home <17.524 (p53) &prop_agricultural <0.015 (p62)<br>&POI_pp_edu <19.208 (p73)       | rate_local4nondance >0.221 (p30) | 65.80  | 0.92 | 16.38 | 0.04 | 1.4E-05 |
| <b>88</b> | den_bldg >0.116 (p37) &prop_shrubland <0.134 (p64)                                             | rate_local4nondance >0.297 (p37) | 87.76  | 0.74 | 16.38 | 0.04 | 4.8E-05 |
| <b>89</b> | ave_household_size <2.831 (p49) &prop_agricultural <0.001 (p43)                                | rate_local4nondance >0.626 (p74) | 29.32  | 0.57 | 16.36 | 0.18 | 3.2E-05 |

|     |                                                                                              |                                  |        |      |       |      |         |
|-----|----------------------------------------------------------------------------------------------|----------------------------------|--------|------|-------|------|---------|
| 90  | prop_preprim_edu <0.144 (p89) &prop_household_3gen <0.062 (p86) &med_area_home <17.727 (p54) | rate_local4nondance >0.172 (p26) | 86.57  | 0.90 | 16.27 | 0.02 | 5E-05   |
| 91  | build_area_pp <56.323 (p46) &prop_rural_set <0.010 (p58)                                     | rate_local4nondance >0.311 (p40) | 52.41  | 0.85 | 16.25 | 0.13 | 7.3E-05 |
| 92  | build_area_pp <86.576 (p61) &prop_rural_set <0.044 (p73) &prop_shrubland <0.151 (p69)        | rate_local4nondance >0.234 (p31) | 60.89  | 0.92 | 16.19 | 0.09 | 6.2E-05 |
| 93  | prop_over65 <0.213 (p89) &med_area_home <17.069 (p52) &prop_rural_set <0.031 (p69)           | rate_local4nondance >0.193 (p27) | 68.66  | 0.94 | 16.19 | 0.04 | 2.6E-05 |
| 94  | prop_household_3gen <0.081 (p92) &med_area_home <16.834 (p50)                                | rate_local4nondance >0.263 (p35) | 80.97  | 0.81 | 16.17 | 0.04 | 2.1E-05 |
| 95  | med_area_home <17.408 (p52) &prop_grassland <0.004 (p26)                                     | rate_local4nondance >0.792 (p82) | 22.13  | 0.67 | 16.15 | 0.20 | 4.3E-05 |
| 96  | med_area_home <15.828 (p46) &prop_agricultural <0.009 (p59) &POI_pp_mall_mkt <11.754 (p77)   | rate_local4nondance >0.261 (p35) | 55.86  | 0.91 | 16.09 | 0.03 | 7.1E-05 |
| 97  | ave_household_size <2.814 (p49) &prop_rural_set <0.004 (p51)                                 | rate_local4nondance >0.568 (p72) | 32.20  | 0.57 | 16.02 | 0.17 | 6.2E-05 |
| 98  | med_area_home <15.809 (p46) &POI_pp_edu <22.066 (p79)                                        | rate_local4nondance >0.228 (p31) | 76.23  | 0.86 | 16.01 | 0.04 | 2.9E-05 |
| 99  | prop_private_resid >0.061 (p55) &prop_woodland <0.101 (p49)                                  | rate_local4nondance >0.700 (p78) | 29.37  | 0.48 | 15.99 | 0.14 | 8E-05   |
| 100 | prop_agricultural <0.034 (p75) &POI_pp_edu <21.430 (p79)                                     | rate_local4nondance >0.191 (p27) | 103.74 | 0.85 | 15.94 | 0.06 | 3.9E-05 |
| 101 | den_public_trans >16.704 (p50) &LU_entropy <0.550 (p49)                                      | rate_local4nondance >0.768 (p81) | 26.39  | 0.48 | 15.92 | 0.18 | 1.2E-07 |
| 102 | prop_preprim_edu <0.123 (p80) &POI_pp_telecom_elec <30.383 (p80)                             | rate_local4nondance >0.172 (p26) | 120.64 | 0.84 | 15.88 | 0.04 | 7E-05   |
| 103 | prop_agricultural <0.018 (p64) &POI_pp_sports <29.408 (p66)                                  | rate_local4nondance >0.200 (p27) | 83.29  | 0.88 | 15.87 | 0.07 | 7.5E-05 |
| 104 | med_income <20991.546 (p73) &prop_private_resid >0.102 (p66)                                 | rate_local4nondance >0.709 (p79) | 24.81  | 0.60 | 15.86 | 0.20 | 2.6E-05 |
| 105 | med_area_home <15.434 (p45) &POI_pp_mall_mkt <12.467 (p79)                                   | rate_local4nondance >0.182 (p26) | 77.87  | 0.91 | 15.73 | 0.04 | 1.1E-05 |
| 106 | med_income <23361.519 (p78) &prop_private_resid >0.055 (p53) &LU_entropy <0.547 (p47)        | rate_local4nondance >0.670 (p77) | 23.32  | 0.71 | 15.73 | 0.21 | 2.6E-05 |
| 107 | med_income <25216.681 (p81) &prop_woodland <0.014 (p23)                                      | rate_local4nondance >0.451 (p61) | 31.42  | 0.79 | 15.72 | 0.13 | 3.8E-05 |
| 108 | med_area_home <17.564 (p53) &den_public_trans >16.704 (p50) &LU_entropy <0.550 (p49)         | rate_local4nondance >0.768 (p81) | 22.23  | 0.66 | 15.71 | 0.11 | 6.6E-05 |
| 109 | prop_household_3gen <0.081 (p92) &prop_rural_set <0.041 (p71)                                | rate_local4nondance >0.271 (p36) | 104.87 | 0.75 | 15.63 | 0.03 | 6E-05   |
| 110 | ave_household_size <2.908 (p63) &LU_entropy <0.550 (p49)                                     | rate_local4nondance >0.721 (p79) | 27.78  | 0.48 | 15.63 | 0.15 | 6.2E-05 |
| 111 | prop_agricultural <0.013 (p61) &POI_pp_mall_mkt <10.307 (p72)                                | rate_local4nondance >0.184 (p26) | 80.85  | 0.90 | 15.58 | 0.07 | 3.1E-05 |
| 112 | den_public_trans >43.717 (p76)                                                               | rate_local4nondance >0.469 (p64) | 35.25  | 0.67 | 15.45 | 0.29 | 2.6E-08 |
| 113 | ave_household_size <2.835 (p49) &prop_transport >0.116 (p50)                                 | rate_local4nondance >0.527 (p69) | 36.27  | 0.56 | 15.43 | 0.11 | 8E-05   |

|     |                                                                                             |                                  |       |      |       |      |         |
|-----|---------------------------------------------------------------------------------------------|----------------------------------|-------|------|-------|------|---------|
| 114 | prop_preprim_edu <0.144 (p89) &build_area_pp <89.360 (p62) &prop_transport >0.084 (p38)     | rate_local4nondance >0.184 (p26) | 79.05 | 0.90 | 15.39 | 0.02 | 2.4E-06 |
| 115 | prop_over65 <0.212 (p89) &POI_pp_telecom_elec <12.318 (p51)                                 | rate_local4nondance >0.189 (p27) | 89.36 | 0.87 | 15.37 | 0.02 | 5E-05   |
| 116 | prop_agricultural <0.009 (p58) &LU_entropy <0.547 (p47)                                     | rate_local4nondance >0.765 (p81) | 28.53 | 0.41 | 15.34 | 0.11 | 4.3E-05 |
| 117 | prop_preprim_edu <0.143 (p88) &den_road >6.756 (p31) &build_area_pp <87.144 (p62)           | rate_local4nondance >0.189 (p27) | 80.98 | 0.89 | 15.33 | 0.02 | 1.6E-05 |
| 118 | med_area_home <15.434 (p45) &POI_pp_sports <79.051 (p90)                                    | rate_local4nondance >0.182 (p26) | 80.47 | 0.90 | 15.27 | 0.03 | 1E-05   |
| 119 | med_area_home <15.547 (p45) &build_area_pp <90.055 (p62)                                    | rate_local4nondance >0.183 (p26) | 75.30 | 0.91 | 15.23 | 0.05 | 5.8E-05 |
| 120 | build_area_pp <93.207 (p63) &prop_rural_set <0.044 (p73) &prop_grassland <0.072 (p68)       | rate_local4nondance >0.200 (p27) | 67.56 | 0.91 | 15.16 | 0.07 | 2.2E-05 |
| 121 | prop_rural_set <0.008 (p56)                                                                 | rate_local4nondance >0.316 (p40) | 84.47 | 0.70 | 15.11 | 0.13 | 1E-05   |
| 122 | ave_household_size <2.908 (p63) &prop_private_resid >0.086 (p63)                            | rate_local4nondance >0.686 (p78) | 25.02 | 0.57 | 15.10 | 0.18 | 2.9E-05 |
| 123 | med_area_home <17.544 (p53) &prop_woodland <0.064 (p36)                                     | rate_local4nondance >0.484 (p65) | 32.34 | 0.67 | 15.08 | 0.15 | 5.5E-05 |
| 124 | med_area_home <17.981 (p55) &prop_agricultural <0.009 (p59) &LU_entropy <0.528 (p40)        | rate_local4nondance >0.503 (p66) | 26.45 | 0.80 | 15.07 | 0.10 | 7.8E-05 |
| 125 | prop_preprim_edu <0.144 (p89) &build_area_pp <89.360 (p62) &prop_shrubland <0.122 (p60)     | rate_local4nondance >0.184 (p26) | 72.52 | 0.91 | 15.02 | 0.03 | 1.6E-05 |
| 126 | prop_agricultural <0.000 (p40)                                                              | rate_local4nondance >0.684 (p78) | 34.23 | 0.40 | 15.00 | 0.18 | 5.7E-07 |
| 127 | ave_household_size <2.977 (p63) &prop_private_resid >0.067 (p56) &LU_entropy <0.546 (p47)   | rate_local4nondance >0.668 (p77) | 22.46 | 0.70 | 14.96 | 0.19 | 5.7E-05 |
| 128 | med_area_home <16.784 (p50) &prop_private_resid >0.105 (p66)                                | rate_local4nondance >0.710 (p79) | 22.43 | 0.64 | 14.92 | 0.24 | 1.7E-05 |
| 129 | den_road >7.464 (p36) &build_area_pp <90.055 (p62)                                          | rate_local4nondance >0.183 (p26) | 82.29 | 0.88 | 14.83 | 0.07 | 2.2E-06 |
| 130 | prop_preprim_edu <0.152 (p91) &med_area_home <20.005 (p67) &build_area_pp <90.055 (p62)     | rate_local4nondance >0.183 (p26) | 87.01 | 0.87 | 14.83 | 0.04 | 7.7E-05 |
| 131 | prop_preprim_edu <0.154 (p91) &build_area_pp <68.364 (p52)                                  | rate_local4nondance >0.171 (p26) | 92.29 | 0.87 | 14.79 | 0.02 | 1.5E-05 |
| 132 | prop_grassland <0.097 (p73) &POI_pp_mall_mkt <10.119 (p71)                                  | rate_local4nondance >0.172 (p26) | 92.45 | 0.87 | 14.74 | 0.07 | 2.6E-05 |
| 133 | med_area_home <15.828 (p46) &prop_rural_set <0.033 (p70) &POI_pp_mall_mkt <11.754 (p77)     | rate_local4nondance >0.195 (p27) | 61.25 | 0.94 | 14.71 | 0.03 | 5.9E-05 |
| 134 | prop_woodland <0.064 (p36)                                                                  | rate_local4nondance >0.699 (p78) | 31.86 | 0.41 | 14.59 | 0.19 | 2.1E-07 |
| 135 | med_area_home <15.828 (p46) &prop_agricultural <0.014 (p61) &POI_pp_transport <41.883 (p64) | rate_local4nondance >0.172 (p26) | 59.66 | 0.97 | 14.57 | 0.04 | 5.5E-05 |
| 136 | den_bldg >0.353 (p79)                                                                       | rate_local4nondance >0.705 (p79) | 24.98 | 0.52 | 14.55 | 0.30 | 2.2E-09 |
| 137 | build_area_pp <89.360 (p62) &prop_transport >0.084 (p38)                                    | rate_local4nondance >0.184 (p26) | 80.37 | 0.88 | 14.51 | 0.05 | 4.3E-05 |

|     |                                                                                                   |                                  |        |      |       |      |         |
|-----|---------------------------------------------------------------------------------------------------|----------------------------------|--------|------|-------|------|---------|
| 138 | prop_preprim_edu <0.141 (p86) &med_income <20294.359 (p73)                                        | rate_local4nondance >0.453 (p62) | 62.86  | 0.51 | 14.48 | 0.06 | 7.1E-05 |
| 139 | med_area_home <15.828 (p46) &LU_entropy <0.632 (p70)<br>&POI_pp_mall_mkt <11.754 (p77)            | rate_local4nondance >0.301 (p37) | 44.53  | 0.88 | 14.38 | 0.04 | 7.2E-05 |
| 140 | prop_open_recreation >0.030 (p48) &LU_entropy <0.550 (p49)                                        | rate_local4nondance >0.715 (p79) | 24.66  | 0.51 | 14.33 | 0.18 | 3.6E-05 |
| 141 | prop_private_resid >0.067 (p56) &LU_entropy <0.544 (p46)                                          | rate_local4nondance >0.692 (p78) | 25.06  | 0.52 | 14.26 | 0.17 | 4.7E-05 |
| 142 | build_area_pp <90.055 (p62) &prop_shrubland <0.118 (p60)                                          | rate_local4nondance >0.183 (p26) | 74.06  | 0.89 | 13.94 | 0.08 | 7.7E-05 |
| 143 | prop_shrubland <0.138 (p65) &POI_pp_transport <58.177 (p76)                                       | rate_local4nondance >0.233 (p31) | 82.40  | 0.81 | 13.86 | 0.06 | 3.9E-05 |
| 144 | med_area_home <16.784 (p50)                                                                       | rate_local4nondance >0.402 (p55) | 62.71  | 0.59 | 13.79 | 0.13 | 7.1E-05 |
| 145 | prop_preprim_edu <0.154 (p91) &med_income <22780.889 (p78)<br>&prop_open_recreation >0.029 (p47)  | rate_local4nondance >0.172 (p26) | 74.31  | 0.90 | 13.78 | 0.04 | 5.6E-05 |
| 146 | prop_industrial <0.000 (p39) &prop_woodland <0.082 (p41)                                          | rate_local4nondance >0.883 (p85) | 19.57  | 0.50 | 13.70 | 0.22 | 2.2E-05 |
| 147 | prop_preprim_edu <0.143 (p88) &den_bldg >0.176 (p50)<br>&build_area_pp <87.144 (p62)              | rate_local4nondance >0.189 (p27) | 59.91  | 0.93 | 13.66 | 0.02 | 5.9E-05 |
| 148 | prop_rural_set <0.053 (p75) &POI_pp_sports <14.628 (p46)                                          | rate_local4nondance >0.263 (p35) | 60.44  | 0.83 | 13.47 | 0.07 | 8.2E-05 |
| 149 | prop_preprim_edu <0.140 (p86) &prop_shrubland <0.157 (p71)                                        | rate_local4nondance >0.201 (p27) | 108.19 | 0.81 | 13.34 | 0.04 | 3.7E-05 |
| 150 | med_area_home <17.981 (p55) &prop_gov_insti_faci >0.025 (p36)<br>&LU_entropy <0.528 (p40)         | rate_local4nondance >0.501 (p66) | 21.89  | 0.87 | 13.32 | 0.17 | 2.1E-05 |
| 151 | prop_private_resid >0.102 (p66)                                                                   | rate_local4nondance >0.709 (p79) | 28.91  | 0.40 | 13.28 | 0.18 | 2.2E-07 |
| 152 | den_bldg >0.180 (p52) &build_area_pp <89.773 (p62)<br>&prop_rural_set <0.078 (p82)                | rate_local4nondance >0.202 (p27) | 55.05  | 0.93 | 13.22 | 0.03 | 3.6E-05 |
| 153 | prop_preprim_edu <0.154 (p91) &build_area_pp <104.259 (p69)<br>&prop_open_recreation >0.029 (p47) | rate_local4nondance >0.172 (p26) | 74.73  | 0.89 | 13.17 | 0.03 | 3.8E-06 |
| 154 | ave_household_size <2.670 (p29) &den_population >26514.578 (p60)                                  | rate_local4nondance >0.528 (p69) | 24.23  | 0.70 | 13.14 | 0.21 | 7.1E-05 |
| 155 | ave_household_size <2.776 (p37) &prop_industrial <0.000 (p36)                                     | rate_local4nondance >0.883 (p85) | 18.56  | 0.49 | 12.96 | 0.20 | 7.5E-05 |
| 156 | build_area_pp <60.952 (p50)                                                                       | rate_local4nondance >0.177 (p26) | 86.02  | 0.86 | 12.89 | 0.13 | 1.8E-06 |
| 157 | den_bldg >0.195 (p54) &build_area_pp <90.055 (p62)                                                | rate_local4nondance >0.183 (p26) | 57.77  | 0.93 | 12.71 | 0.07 | 2.5E-05 |
| 158 | prop_shrubland <0.000 (p18)                                                                       | rate_local4nondance >0.966 (p88) | 17.77  | 0.46 | 12.58 | 0.32 | 6.6E-13 |
| 159 | den_population >53156.370 (p79) &build_area_pp <104.293 (p69)<br>&prop_rural_set <0.046 (p73)     | rate_local4nondance >0.238 (p31) | 42.43  | 0.95 | 12.30 | 0.01 | 5.4E-05 |
| 160 | den_public_trans >23.523 (p57) &build_area_pp <89.360 (p62)                                       | rate_local4nondance >0.184 (p26) | 60.66  | 0.91 | 12.29 | 0.06 | 7.9E-05 |
| 161 | den_public_trans >25.295 (p58) &build_area_pp <85.683 (p60)<br>&prop_shrubland <0.186 (p79)       | rate_local4nondance >0.184 (p26) | 55.09  | 0.93 | 12.09 | 0.02 | 6.4E-05 |
| 162 | den_population >53156.370 (p79) &build_area_pp <104.293 (p69)                                     | rate_local4nondance >0.238 (p31) | 43.64  | 0.93 | 12.07 | 0.00 | 7.1E-06 |

|            |                                                                                                  |                                           |        |      |       |      |         |
|------------|--------------------------------------------------------------------------------------------------|-------------------------------------------|--------|------|-------|------|---------|
| <b>163</b> | med_income <14611.112 (p25) &LU_entropy <0.543 (p46)                                             | rate_local4nondance >0.604 (p74)          | 18.09  | 0.79 | 12.01 | 0.37 | 8.7E-06 |
| <b>164</b> | LU_entropy <0.549 (p48)                                                                          | rate_local4nondance >0.673 (p77)          | 35.65  | 0.35 | 11.85 | 0.12 | 2.9E-05 |
| <b>165</b> | LU_entropy <0.632 (p70) &POI_pp_telecom_elec <8.323 (p41) &POI_pp_mall_mkt <11.754 (p77)         | rate_local4nondance >0.208 (p29)          | 46.52  | 0.94 | 11.72 | 0.02 | 7.8E-05 |
| <b>166</b> | build_area_pp <99.648 (p67) &prop_open_recreation >0.027 (p46)                                   | rate_local4nondance >0.172 (p26)          | 74.96  | 0.86 | 11.34 | 0.06 | 3.7E-05 |
| <b>167</b> | ave_household_size <2.593 (p17)                                                                  | rate_local4nondance >0.540 (p71)          | 26.06  | 0.54 | 11.30 | 0.23 | 1.6E-06 |
| <b>168</b> | den_road >18.893 (p78) &prop_private_resid >0.066 (p56)                                          | rate_local4nondance >0.298 (p37)          | 34.91  | 0.89 | 11.27 | 0.08 | 5E-05   |
| <b>169</b> | prop_industrial <0.000 (p36)                                                                     | rate_local4nondance >0.883 (p85)          | 22.79  | 0.29 | 11.10 | 0.14 | 4.5E-06 |
| <b>170</b> | prop_publicResid >0.060 (p74)                                                                    | rate_local4nondance >0.259 (p35)          | 46.79  | 0.84 | 10.49 | 0.19 | 5.3E-05 |
| <b>171</b> | den_road =16.248-26.910 (p71-92)                                                                 | rate_local4nondance >0.711 (p79)          | 19.42  | 0.43 | 9.62  | 0.21 | 3.7E-06 |
| <b>172</b> | med_income <14182.663 (p21)                                                                      | rate_local4nondance >0.455 (p62)          | 26.82  | 0.60 | 9.40  | 0.21 | 7E-05   |
| <b>173</b> | build_area_pp <37.211 (p27) &prop_grassland <0.020 (p46) &LU_entropy <0.523 (p40)                | rate_local4nondance >0.737 (p79)          | 11.65  | 0.97 | 9.22  | 0.24 | 6.3E-05 |
| <b>174</b> | build_area_pp <35.213 (p22) &prop_shrubland <0.172 (p76) &LU_entropy <0.550 (p49)                | rate_local4nondance >0.780 (p82)          | 11.24  | 0.86 | 8.82  | 0.22 | 3.7E-05 |
| <b>175</b> | prop_business >0.085 (p90)                                                                       | rate_local4nondance >0.663 (p77)          | 14.01  | 0.63 | 8.75  | 0.39 | 1.6E-07 |
| <b>176</b> | build_area_pp <37.211 (p27) &LU_entropy <0.523 (p40)                                             | rate_local4nondance >0.737 (p79)          | 11.69  | 0.73 | 8.44  | 0.39 | 6.2E-05 |
| <b>177</b> | prop_preprim_edu <0.154 (p91)                                                                    | rate_local4nondance >0.181 (p26)          | 149.43 | 0.77 | 8.23  | 0.04 | 5.3E-07 |
| <b>178</b> | den_road >26.910 (p92)                                                                           | rate_local4nondance >0.711 (p79)          | 11.57  | 0.67 | 7.87  | 0.46 | 4.1E-06 |
| <b>179</b> | build_area_pp <39.920 (p30) &POI_pp_transport >34.785 (p57)                                      | rate_local4nondance >1.045 (p89)          | 4.14   | 0.56 | 3.34  | 0.39 | 3.5E-05 |
| <b>180</b> | build_area_pp <39.359 (p29) &POI_pp_sports >28.053 (p65)                                         | rate_local4nondance >1.036 (p89)          | 3.45   | 0.62 | 2.84  | 0.45 | 1E-05   |
| <b>181</b> | prop_preprim_edu <0.146 (p89) &ave_household_size >2.549 (p17) &POI_pp_mall_mkt <8.343 (p65)     | rate_local4nondance =0.014-0.963 (p18-88) | 98.12  | 0.91 | 23.43 | 0.03 | 1.1E-05 |
| <b>182</b> | ave_household_size >2.549 (p17) &POI_pp_telecom_elec <17.433 (p62) &POI_pp_mall_mkt <8.343 (p65) | rate_local4nondance =0.014-0.963 (p18-88) | 96.71  | 0.91 | 23.43 | 0.02 | 1.2E-05 |
| <b>183</b> | ave_household_size >2.549 (p17) &POI_pp_telecom_elec <17.433 (p62)                               | rate_local4nondance =0.014-0.963 (p18-88) | 100.00 | 0.89 | 22.52 | 0.05 | 8.5E-07 |
| <b>184</b> | prop_preprim_edu <0.136 (p85) &POI_pp_mall_mkt <8.343 (p65)                                      | rate_local4nondance =0.014-0.963 (p18-88) | 103.84 | 0.88 | 22.28 | 0.04 | 2.4E-05 |
| <b>185</b> | den_road <17.868 (p75) &POI_pp_telecom_elec <17.433 (p62) &POI_pp_mall_mkt <8.343 (p65)          | rate_local4nondance =0.014-0.963 (p18-88) | 88.33  | 0.92 | 22.19 | 0.02 | 7.4E-05 |
| <b>186</b> | ave_household_size >2.657 (p29) &POI_pp_sports <28.806 (p66)                                     | rate_local4nondance =0.022-0.951 (p18-88) | 92.04  | 0.90 | 22.14 | 0.07 | 2.4E-05 |
| <b>187</b> | den_road <23.151 (p87) &POI_pp_telecom_elec <13.898 (p56)                                        | rate_local4nondance =0.048-0.883 (p18-85) | 91.10  | 0.88 | 22.11 | 0.05 | 7.8E-05 |

|            |                                                                                                    |                                           |        |      |       |      |         |
|------------|----------------------------------------------------------------------------------------------------|-------------------------------------------|--------|------|-------|------|---------|
| <b>188</b> | LU_entropy >0.549 (p48) &POI_pp_telecom_elec <18.430 (p65)                                         | rate_local4nondance =0.016-0.871 (p18-85) | 80.71  | 0.91 | 21.73 | 0.11 | 6.8E-07 |
| <b>189</b> | LU_entropy >0.539 (p44) &POI_pp_sports <31.203 (p68)                                               | rate_local4nondance =0.017-0.650 (p18-76) | 76.60  | 0.80 | 21.65 | 0.10 | 1.1E-05 |
| <b>190</b> | ave_household_size >2.527 (p17) &POI_pp_telecom_elec <20.788 (p69) &POI_pp_transport <33.527 (p56) | rate_local4nondance =0.060-1.051 (p18-89) | 94.64  | 0.91 | 21.52 | 0.01 | 4.5E-05 |
| <b>191</b> | ave_household_size >2.663 (p29) &POI_pp_mall_mkt <7.867 (p63)                                      | rate_local4nondance =0.014-0.899 (p18-86) | 87.95  | 0.89 | 21.27 | 0.06 | 4.2E-05 |
| <b>192</b> | ave_household_size >2.527 (p17) &POI_pp_transport <33.527 (p56)                                    | rate_local4nondance =0.060-1.051 (p18-89) | 95.34  | 0.91 | 21.03 | 0.03 | 1.5E-05 |
| <b>193</b> | ave_household_size >2.616 (p29) &POI_pp_edu <17.631 (p70)                                          | rate_local4nondance =0.014-0.963 (p18-88) | 100.36 | 0.87 | 20.93 | 0.06 | 1.9E-05 |
| <b>194</b> | prop_preprim_edu <0.154 (p91) &POI_pp_edu <15.368 (p68)                                            | rate_local4nondance =0.006-0.926 (p18-86) | 108.44 | 0.84 | 20.87 | 0.03 | 4.6E-05 |
| <b>195</b> | POI_pp_sports <28.160 (p66)                                                                        | rate_local4nondance =0.015-0.998 (p18-88) | 117.21 | 0.85 | 20.85 | 0.15 | 1E-11   |
| <b>196</b> | LU_entropy >0.545 (p47) &POI_pp_transport <44.490 (p67)                                            | rate_local4nondance =0.019-0.778 (p18-82) | 79.21  | 0.85 | 20.79 | 0.09 | 3E-05   |
| <b>197</b> | LU_entropy >0.526 (p40) &POI_pp_mall_mkt <8.791 (p66)                                              | rate_local4nondance =0.016-0.659 (p18-77) | 79.54  | 0.78 | 20.62 | 0.08 | 5.9E-05 |
| <b>198</b> | POI_pp_transport <44.490 (p67)                                                                     | rate_local4nondance =0.019-0.992 (p18-88) | 117.66 | 0.84 | 20.31 | 0.15 | 1.8E-11 |
| <b>199</b> | prop_private_resid <0.192 (p81) &POI_pp_telecom_elec <15.780 (p59)                                 | rate_local4nondance =0.044-0.724 (p18-79) | 81.10  | 0.81 | 19.99 | 0.06 | 1.8E-05 |
| <b>200</b> | prop_private_resid <0.163 (p78) &POI_pp_sports <28.912 (p66)                                       | rate_local4nondance =0.057-0.775 (p18-82) | 85.96  | 0.81 | 19.90 | 0.06 | 2.7E-05 |
| <b>201</b> | prop_preprim_edu <0.153 (p91) &LU_entropy >0.545 (p47)                                             | rate_local4nondance =0.003-0.874 (p18-85) | 87.60  | 0.86 | 19.77 | 0.06 | 9E-08   |
| <b>202</b> | prop_private_resid <0.162 (p78) &POI_pp_telecom_elec <20.788 (p69) &POI_pp_transport <33.527 (p56) | rate_local4nondance =0.060-1.051 (p18-89) | 83.56  | 0.92 | 19.70 | 0.01 | 2E-05   |
| <b>203</b> | LU_entropy >0.538 (p44) &POI_pp_edu <15.368 (p68)                                                  | rate_local4nondance =0.006-0.926 (p18-86) | 83.14  | 0.89 | 19.65 | 0.08 | 4E-05   |
| <b>204</b> | POI_pp_telecom_elec <19.858 (p68)                                                                  | rate_local4nondance =0.015-0.998 (p18-88) | 121.45 | 0.83 | 19.63 | 0.13 | 2.7E-10 |
| <b>205</b> | prop_private_resid <0.162 (p78) &POI_pp_transport <33.527 (p56)                                    | rate_local4nondance =0.060-1.051 (p18-89) | 84.37  | 0.91 | 19.21 | 0.04 | 7.4E-05 |
| <b>206</b> | POI_pp_mall_mkt <8.922 (p66)                                                                       | rate_local4nondance =0.015-0.998 (p18-88) | 118.47 | 0.83 | 19.14 | 0.13 | 4E-11   |
| <b>207</b> | prop_private_resid <0.192 (p81) &POI_pp_edu <12.154 (p55)                                          | rate_local4nondance =0.044-0.724 (p18-79) | 79.80  | 0.80 | 18.89 | 0.05 | 7.6E-05 |
| <b>208</b> | den_bldg <0.254 (p65) &POI_pp_sports <28.912 (p66)                                                 | rate_local4nondance =0.057-0.775 (p18-82) | 75.97  | 0.82 | 18.79 | 0.07 | 4.1E-05 |
| <b>209</b> | POI_pp_edu <17.631 (p70)                                                                           | rate_local4nondance =0.015-0.998 (p18-88) | 123.19 | 0.82 | 18.52 | 0.12 | 4E-11   |
| <b>210</b> | prop_over65 <0.214 (p90) &LU_entropy >0.551 (p49)                                                  | rate_local4nondance =0.015-0.933 (p18-86) | 82.41  | 0.87 | 17.94 | 0.06 | 3.1E-05 |
| <b>211</b> | den_road <13.077 (p60) &POI_pp_sports <28.912 (p66)                                                | rate_local4nondance =0.057-0.775 (p18-82) | 67.80  | 0.83 | 17.05 | 0.08 | 1.6E-05 |
| <b>212</b> | den_road <13.077 (p60) &POI_pp_transport <43.655 (p65)                                             | rate_local4nondance =0.057-0.775 (p18-82) | 67.29  | 0.83 | 16.78 | 0.08 | 4.6E-05 |
| <b>213</b> | LU_entropy >0.549 (p48)                                                                            | rate_local4nondance =0.058-0.673 (p18-77) | 81.07  | 0.72 | 15.78 | 0.14 | 4.6E-07 |
| <b>214</b> | prop_preprim_edu <0.146 (p89) &ave_household_size >2.549 (p17)                                     | rate_local4nondance =0.014-0.963 (p18-88) | 120.96 | 0.78 | 14.31 | 0.05 | 5.9E-05 |
| <b>215</b> | den_public_trans >16.704 (p50) &LU_entropy >0.550 (p49)                                            | rate_local4nondance =0.289-0.768 (p37-81) | 35.37  | 0.61 | 10.80 | 0.11 | 2.7E-05 |

|                                                                                 |                                           |        |      |       |      |         |
|---------------------------------------------------------------------------------|-------------------------------------------|--------|------|-------|------|---------|
| <b>216</b> prop_shrubland =0.000-0.071 (p18-50)                                 | rate_local4nondance =0.169-0.966 (p26-88) | 50.94  | 0.74 | 9.41  | 0.14 | 7.6E-05 |
| <b>217</b> prop_household_3gen <0.062 (p86)                                     | rate_local4nondance =0.015-0.998 (p18-88) | 137.28 | 0.75 | 8.91  | 0.05 | 3.4E-05 |
| <b>218</b> den_public_trans >20.063 (p54) &prop_shrubland =0.041-0.165 (p42-74) | rate_local4nondance =0.170-0.814 (p26-83) | 20.01  | 0.81 | 6.17  | 0.18 | 4.2E-05 |
| <b>219</b> den_road <15.914 (p70) &prop_publicResid <0.049 (p71)                | rate_local4nondance <0.287 (p37)          | 59.77  | 0.57 | 20.58 | 0.10 | 5.5E-05 |
| <b>220</b> den_bldg <0.262 (p67) &prop_publicResid <0.045 (p71)                 | rate_local4nondance <0.289 (p37)          | 57.88  | 0.58 | 20.38 | 0.10 | 7.1E-05 |
| <b>221</b> prop_publicResid <0.059 (p73) &prop_transport <0.184 (p64)           | rate_local4nondance <0.308 (p38)          | 62.49  | 0.60 | 19.39 | 0.08 | 7.9E-05 |
| <b>222</b> prop_publicResid <0.048 (p71) &prop_business <0.011 (p70)            | rate_local4nondance <0.317 (p40)          | 62.51  | 0.59 | 19.35 | 0.11 | 4.8E-05 |
| <b>223</b> prop_transport <0.145 (p55) &POI_pp_sports >25.649 (p63)             | rate_local4nondance <0.013 (p18)          | 28.20  | 0.54 | 19.01 | 0.16 | 1.1E-05 |
| <b>224</b> den_population <9985.274 (p41) &POI_pp_sports >25.649 (p63)          | rate_local4nondance <0.013 (p18)          | 27.65  | 0.56 | 18.95 | 0.18 | 9.7E-06 |
| <b>225</b> den_population <7419.977 (p38)                                       | rate_local4nondance <0.168 (p26)          | 39.48  | 0.48 | 18.88 | 0.23 | 7.5E-11 |
| <b>226</b> prop_private_resid <0.123 (p70) &prop_publicResid <0.045 (p71)       | rate_local4nondance <0.289 (p37)          | 56.36  | 0.57 | 18.87 | 0.11 | 3.7E-05 |
| <b>227</b> den_bldg <0.243 (p64) &POI_pp_transport >33.527 (p56)                | rate_local4nondance <0.014 (p18)          | 29.14  | 0.49 | 18.54 | 0.14 | 2.7E-05 |
| <b>228</b> den_population <10950.266 (p43) &POI_pp_transport >40.350 (p62)      | rate_local4nondance <0.006 (p18)          | 26.94  | 0.54 | 18.09 | 0.16 | 5.9E-05 |
| <b>229</b> den_road <13.077 (p60) &POI_pp_sports >28.912 (p66)                  | rate_local4nondance <0.057 (p18)          | 26.42  | 0.57 | 17.95 | 0.17 | 1.5E-05 |
| <b>230</b> prop_publicResid <0.048 (p71) &prop_grassland >0.033 (p57)           | rate_local4nondance <0.263 (p35)          | 46.43  | 0.57 | 17.91 | 0.08 | 1.9E-05 |
| <b>231</b> prop_transport <0.132 (p52) &POI_pp_transport >29.897 (p52)          | rate_local4nondance <0.106 (p20)          | 30.09  | 0.49 | 17.87 | 0.15 | 6.7E-05 |
| <b>232</b> den_bldg <0.254 (p65) &POI_pp_sports >28.912 (p66)                   | rate_local4nondance <0.057 (p18)          | 26.92  | 0.54 | 17.83 | 0.14 | 7E-05   |
| <b>233</b> den_road <13.077 (p60) &POI_pp_transport >43.655 (p65)               | rate_local4nondance <0.057 (p18)          | 26.22  | 0.57 | 17.79 | 0.17 | 4.6E-05 |
| <b>234</b> prop_transport <0.140 (p54) &POI_pp_telecom_elec >12.979 (p54)       | rate_local4nondance <0.073 (p19)          | 29.76  | 0.46 | 17.52 | 0.13 | 4.9E-05 |
| <b>235</b> POI_pp_sports >28.160 (p66)                                          | rate_local4nondance <0.015 (p18)          | 31.09  | 0.41 | 17.52 | 0.23 | 1E-11   |
| <b>236</b> den_road <16.248 (p71)                                               | rate_local4nondance <0.711 (p79)          | 136.45 | 0.90 | 17.39 | 0.11 | 5.1E-12 |
| <b>237</b> den_road <17.994 (p75) &prop_business <0.057 (p86)                   | rate_local4nondance <0.697 (p78)          | 139.38 | 0.89 | 17.38 | 0.01 | 1.7E-06 |
| <b>238</b> den_population <47091.966 (p74) &prop_business <0.079 (p89)          | rate_local4nondance <0.474 (p64)          | 108.32 | 0.75 | 17.29 | 0.03 | 6.3E-05 |
| <b>239</b> den_road <13.077 (p60) &POI_pp_edu >11.980 (p55)                     | rate_local4nondance <0.091 (p19)          | 27.82  | 0.51 | 17.26 | 0.17 | 8.6E-06 |
| <b>240</b> med_area_home >14.781 (p37) &prop_business <0.056 (p86)              | rate_local4nondance <0.469 (p64)          | 90.52  | 0.78 | 17.17 | 0.06 | 5.6E-05 |
| <b>241</b> den_bldg <0.154 (p46) &POI_pp_telecom_elec >12.150 (p51)             | rate_local4nondance <0.101 (p20)          | 28.73  | 0.51 | 17.15 | 0.17 | 2.5E-05 |
| <b>242</b> prop_transport <0.143 (p55)                                          | rate_local4nondance <0.419 (p58)          | 83.18  | 0.71 | 17.13 | 0.15 | 9.2E-08 |
| <b>243</b> prop_transport <0.134 (p52) &POI_pp_edu >11.888 (p55)                | rate_local4nondance <0.090 (p19)          | 27.48  | 0.50 | 16.93 | 0.16 | 3.3E-05 |
| <b>244</b> prop_shrubland >0.058 (p48) &POI_pp_sports >25.506 (p63)             | rate_local4nondance <0.010 (p18)          | 25.08  | 0.55 | 16.92 | 0.16 | 6.1E-05 |
| <b>245</b> den_bldg <0.193 (p53)                                                | rate_local4nondance <0.317 (p40)          | 64.47  | 0.56 | 16.92 | 0.15 | 6.1E-06 |
| <b>246</b> prop_transport <0.145 (p55) &POI_pp_mall_mkt >7.372 (p60)            | rate_local4nondance <0.006 (p18)          | 25.34  | 0.53 | 16.84 | 0.18 | 1.2E-05 |

|     |                                                                     |                                  |        |      |       |      |         |
|-----|---------------------------------------------------------------------|----------------------------------|--------|------|-------|------|---------|
| 247 | POI_pp_transport >44.490 (p67)                                      | rate_local4nondance <0.019 (p18) | 29.99  | 0.41 | 16.83 | 0.23 | 3.9E-11 |
| 248 | den_road <13.153 (p60) &POI_pp_mall_mkt >7.878 (p64)                | rate_local4nondance <0.009 (p18) | 24.54  | 0.56 | 16.77 | 0.21 | 5.3E-06 |
| 249 | den_population <9173.983 (p40) &POI_pp_edu >15.204 (p67)            | rate_local4nondance <0.026 (p18) | 24.11  | 0.58 | 16.68 | 0.20 | 1.6E-05 |
| 250 | den_public_trans <24.072 (p58)                                      | rate_local4nondance <0.469 (p64) | 93.72  | 0.76 | 16.63 | 0.14 | 7.8E-08 |
| 251 | den_bldg <0.165 (p48) &POI_pp_edu >11.833 (p55)                     | rate_local4nondance <0.106 (p20) | 25.79  | 0.55 | 16.48 | 0.21 | 8.9E-06 |
| 252 | den_population <10000.913 (p42) &POI_pp_mall_mkt >8.364 (p65)       | rate_local4nondance <0.003 (p18) | 23.44  | 0.58 | 16.25 | 0.21 | 6.4E-05 |
| 253 | den_bldg <0.154 (p46) &POI_pp_mall_mkt >7.030 (p60)                 | rate_local4nondance <0.015 (p18) | 22.89  | 0.57 | 15.72 | 0.23 | 7.3E-06 |
| 254 | prop_private_resid <0.117 (p70) &POI_pp_mall_mkt >5.409 (p51)       | rate_local4nondance <0.194 (p27) | 34.68  | 0.49 | 15.30 | 0.12 | 6.9E-05 |
| 255 | prop_shrubland >0.047 (p43) &POI_pp_mall_mkt >6.422 (p56)           | rate_local4nondance <0.084 (p19) | 24.87  | 0.49 | 15.20 | 0.16 | 2.3E-05 |
| 256 | den_road <20.469 (p81) &den_public_trans <24.072 (p58)              | rate_local4nondance <0.708 (p79) | 106.89 | 0.91 | 14.96 | 0.03 | 5.4E-05 |
| 257 | POI_pp_edu >17.631 (p70)                                            | rate_local4nondance <0.015 (p18) | 26.36  | 0.41 | 14.94 | 0.23 | 1E-09   |
| 258 | prop_agricultural >0.027 (p72)                                      | rate_local4nondance <0.296 (p37) | 39.10  | 0.63 | 14.82 | 0.24 | 1.9E-07 |
| 259 | prop_shrubland >0.058 (p48) &POI_pp_edu >13.918 (p63)               | rate_local4nondance <0.098 (p19) | 23.43  | 0.53 | 14.65 | 0.16 | 3.2E-05 |
| 260 | POI_pp_mall_mkt >8.922 (p66)                                        | rate_local4nondance <0.015 (p18) | 27.13  | 0.38 | 14.31 | 0.20 | 7.4E-08 |
| 261 | prop_woodland >0.064 (p36)                                          | rate_local4nondance <0.699 (p78) | 120.23 | 0.88 | 14.31 | 0.11 | 2.1E-07 |
| 262 | den_public_trans <14.796 (p47) &POI_pp_mall_mkt >7.062 (p60)        | rate_local4nondance <0.000 (p0)  | 22.43  | 0.47 | 13.98 | 0.14 | 7.9E-05 |
| 263 | prop_publicResid <0.052 (p72) &prop_shrubland =0.108-0.217 (p57-82) | rate_local4nondance <0.263 (p35) | 27.66  | 0.70 | 13.96 | 0.16 | 2.3E-05 |
| 264 | med_area_home >16.784 (p50)                                         | rate_local4nondance <0.402 (p55) | 71.80  | 0.67 | 13.70 | 0.13 | 7.1E-05 |
| 265 | prop_grassland >0.038 (p58)                                         | rate_local4nondance <0.364 (p49) | 60.21  | 0.63 | 13.65 | 0.14 | 2.1E-05 |
| 266 | prop_private_resid <0.102 (p66)                                     | rate_local4nondance <0.709 (p79) | 124.65 | 0.88 | 13.36 | 0.09 | 2.2E-07 |
| 267 | build_area_pp >60.952 (p50)                                         | rate_local4nondance <0.177 (p26) | 43.74  | 0.38 | 12.74 | 0.11 | 1.8E-06 |
| 268 | prop_gov_insti_faci <0.023 (p33)                                    | rate_local4nondance <0.016 (p18) | 25.53  | 0.35 | 12.54 | 0.17 | 2.5E-06 |
| 269 | prop_open_recreation <0.008 (p27)                                   | rate_local4nondance <0.277 (p37) | 33.47  | 0.58 | 12.41 | 0.21 | 6E-05   |
| 270 | prop_rural_set >0.040 (p71)                                         | rate_local4nondance <0.316 (p40) | 38.48  | 0.62 | 12.32 | 0.20 | 2E-05   |
| 271 | prop_shrubland >0.071 (p50)                                         | rate_local4nondance <0.169 (p26) | 39.12  | 0.37 | 11.44 | 0.11 | 6.6E-05 |
| 272 | ave_household_size >2.593 (p17)                                     | rate_local4nondance <0.540 (p71) | 126.28 | 0.76 | 11.40 | 0.07 | 1.6E-06 |
| 273 | den_bldg <0.113 (p37) &prop_woodland <0.153 (p58)                   | rate_local4nondance <0.399 (p55) | 25.15  | 0.94 | 10.66 | 0.24 | 2.3E-05 |
| 274 | prop_publicResid <0.060 (p74)                                       | rate_local4nondance <0.259 (p35) | 66.26  | 0.42 | 10.61 | 0.07 | 5.3E-05 |
| 275 | POI_pp_telecom_elec >50.291 (p90)                                   | rate_local4nondance <0.015 (p18) | 13.60  | 0.60 | 9.55  | 0.42 | 2.5E-08 |
| 276 | prop_household_3gen >0.062 (p86)                                    | rate_local4nondance <0.015 (p18) | 14.93  | 0.49 | 9.51  | 0.31 | 2.6E-07 |
| 277 | prop_preprim_edu >0.154 (p91)                                       | rate_local4nondance <0.003 (p18) | 12.86  | 0.65 | 9.36  | 0.47 | 1.4E-09 |
| 278 | POI_pp_telecom_elec =19.858-50.291 (p68-90)                         | rate_local4nondance <0.015 (p18) | 17.52  | 0.38 | 9.28  | 0.20 | 4.8E-05 |



|                                                                                              |                                  |        |      |      |      |         |
|----------------------------------------------------------------------------------------------|----------------------------------|--------|------|------|------|---------|
| <b>279</b> prop_business <0.085 (p90)                                                        | rate_local4nondance <0.663 (p77) | 155.00 | 0.81 | 8.64 | 0.05 | 1.6E-07 |
| <b>280</b> med_income <26002.239 (p82) &den_bldg <0.118 (p38)<br>&prop_woodland <0.150 (p57) | rate_local4nondance <0.339 (p44) | 18.43  | 0.80 | 7.99 | 0.04 | 7.6E-05 |
| <b>281</b> prop_over65 >0.232 (p94)                                                          | rate_local4nondance <0.177 (p26) | 10.00  | 0.77 | 6.64 | 0.51 | 1.3E-05 |
| <b>282</b> gender_ratio >109.069 (p94)                                                       | rate_local4nondance <0.087 (p19) | 9.00   | 0.68 | 6.47 | 0.49 | 2.2E-06 |

(f) Rules for wave-1 local case rate; POI density was used

| No. | Antecedent                                                                                                                               | Consequent                         | Supp  | Conf | Lev   | Imp  | P         |
|-----|------------------------------------------------------------------------------------------------------------------------------------------|------------------------------------|-------|------|-------|------|-----------|
| 1   | build_area_pp >66.740 (p52)                                                                                                              | rate_local12 >0.113 (p81)          | 32.36 | 0.30 | 11.69 | 0.11 | 2.006E-05 |
| 2   | POI_den_sports =235.262-1634.870 (p58-91)                                                                                                | rate_local12 >0.039 (p60)          | 39.15 | 0.56 | 11.23 | 0.16 | 2.365E-05 |
| 3   | prop_preprim_edu <0.080 (p19)                                                                                                            | rate_local12 >0.114 (p81)          | 17.89 | 0.44 | 10.13 | 0.25 | 7.552E-06 |
| 4   | LU_entropy <0.543 (p46)                                                                                                                  | rate_local12 >0.103 (p79)          | 30.07 | 0.31 | 9.55  | 0.10 | 7.803E-05 |
| 5   | prop_private_resid >0.162 (p78)                                                                                                          | rate_local12 >0.062 (p71)          | 24.06 | 0.50 | 9.24  | 0.19 | 6.131E-05 |
| 6   | prop_household_3gen <0.023 (p19)                                                                                                         | rate_local12 >0.102 (p78)          | 18.22 | 0.40 | 8.54  | 0.19 | 2.745E-05 |
| 7   | med_area_home >15.950 (p47)                                                                                                              | rate_local12 >0.132 (p83)          | 27.40 | 0.23 | 8.53  | 0.07 | 5.739E-05 |
| 8   | POI_den_telecom_elec >375.328 (p72)                                                                                                      | rate_local12 >0.103 (p79)          | 19.82 | 0.34 | 7.34  | 0.12 | 3.887E-05 |
| 9   | med_income >19063.503 (p63)                                                                                                              | rate_local12 >0.133 (p84)          | 19.74 | 0.25 | 7.27  | 0.09 | 6.98E-05  |
| 10  | prop_transport >0.336 (p88)                                                                                                              | rate_local12 >0.091 (p77)          | 12.50 | 0.49 | 6.58  | 0.26 | 1.018E-05 |
| 11  | prop_higher_edu >0.382 (p87)                                                                                                             | rate_local12 >0.136 (p86)          | 10.35 | 0.39 | 6.23  | 0.24 | 3.376E-05 |
| 12  | gender_ratio >106.162 (p92)                                                                                                              | rate_local12 >0.108 (p81)          | 9.79  | 0.52 | 6.00  | 0.32 | 4.133E-05 |
| 13  | prop_private_resid =0.017-0.058 (p33-55) &prop_business <0.000 (p26)                                                                     | rate_local12 >0.170 (p89)          | 3.83  | 0.68 | 3.17  | 0.53 | 1.705E-08 |
| 14  | gender_ratio =87.315-99.297 (p11-79) &med_area_home <18.056 (p55)<br>prop_preprim_edu =0.081-0.132 (p20-83) &med_area_home <17.190 (p52) | rate_local12 =0.005-0.102 (p45-78) | 57.32 | 0.63 | 27.28 | 0.12 | 2.065E-07 |
| 15  | &POI_den_telecom_elec <632.455 (p82)<br>prop_preprim_edu =0.080-0.134 (p19-84) &med_area_home <17.190 (p52)                              | rate_local12 =0.005-0.099 (p45-78) | 49.00 | 0.74 | 27.18 | 0.11 | 5.256E-05 |
| 16  | &POI_den_edu <626.668 (p81)<br>prop_preprim_edu =0.081-0.132 (p20-83) &med_area_home <17.190 (p52)                                       | rate_local12 =0.005-0.096 (p45-77) | 48.86 | 0.72 | 27.15 | 0.11 | 6.1E-06   |
| 17  | &POI_den_mall_mkt <344.195 (p80)<br>gender_ratio =85.221-98.201 (p10-78) &med_area_home <21.719 (p78)                                    | rate_local12 =0.006-0.092 (p45-77) | 47.56 | 0.72 | 26.97 | 0.11 | 1.286E-05 |
| 18  | &prop_gov_insti_faci =0.017-0.148 (p31-92)<br>prop_preprim_edu =0.081-0.132 (p20-83) &med_area_home <17.190 (p52)                        | rate_local12 =0.005-0.105 (p45-80) | 55.03 | 0.66 | 26.65 | 0.07 | 4.552E-05 |
| 19  | &POI_den_sports <854.408 (p78)<br>den_road >5.958 (p28) &build_area_pp <91.523 (p62) &POI_den_mall_mkt                                   | rate_local12 =0.005-0.091 (p45-77) | 46.56 | 0.73 | 26.65 | 0.11 | 1.966E-05 |
| 20  | <420.619 (p84)<br>den_road >5.901 (p28) &build_area_pp <89.092 (p62) &POI_den_sports                                                     | rate_local12 =0.006-0.104 (p45-80) | 53.21 | 0.67 | 26.57 | 0.11 | 1.911E-05 |
| 21  | <1142.618 (p83)<br>den_road >5.901 (p28) &build_area_pp <89.092 (p62) &POI_den_edu <593.042                                              | rate_local12 =0.005-0.102 (p45-79) | 52.17 | 0.67 | 26.37 | 0.11 | 3.762E-05 |
| 22  | (p80)<br>build_area_pp <90.579 (p62) &prop_transport >0.073 (p36) &POI_den_mall_mkt                                                      | rate_local12 =0.005-0.099 (p45-78) | 50.21 | 0.68 | 26.13 | 0.13 | 1.04E-05  |
| 23  | <425.102 (p84)<br>prop_over65 =0.120-0.208 (p19-86) &med_area_home <19.142 (p61)                                                         | rate_local12 =0.005-0.105 (p45-80) | 50.61 | 0.70 | 26.06 | 0.12 | 1.69E-05  |
| 24  | &build_area_pp <97.100 (p65)                                                                                                             | rate_local12 =0.004-0.118 (p45-82) | 53.31 | 0.70 | 25.97 | 0.09 | 7.57E-05  |

|                                                                                                                                |                                    |       |      |       |      |           |
|--------------------------------------------------------------------------------------------------------------------------------|------------------------------------|-------|------|-------|------|-----------|
| den_road >5.957 (p28) &build_area_pp <92.118 (p63) &POI_den_transport<br>25 <1507.864 (p80)                                    | rate_local12 =0.006-0.100 (p45-78) | 50.42 | 0.68 | 25.95 | 0.13 | 7.5E-06   |
| gender_ratio =86.676-98.772 (p11-78) &den_road >6.094 (p29) &build_area_pp<br>26 <97.142 (p65)                                 | rate_local12 =0.006-0.106 (p45-80) | 55.24 | 0.64 | 25.94 | 0.08 | 4.19E-05  |
| gender_ratio <96.984 (p75) &med_area_home <19.270 (p61)<br>27 &POI_den_telecom_elec <596.386 (p80)                             | rate_local12 =0.005-0.104 (p45-79) | 54.94 | 0.63 | 25.80 | 0.07 | 1.107E-05 |
| 28 med_area_home <17.472 (p52) &prop_business <0.064 (p87)                                                                     | rate_local12 =0.004-0.115 (p45-81) | 60.46 | 0.62 | 25.73 | 0.07 | 3.7E-05   |
| den_road >5.750 (p27) &build_area_pp <88.011 (p62) &POI_den_telecom_elec<br>29 <592.792 (p80)                                  | rate_local12 =0.005-0.102 (p45-78) | 50.45 | 0.68 | 25.69 | 0.12 | 2.301E-06 |
| build_area_pp <92.122 (p63) &prop_transport >0.075 (p36) &POI_den_edu<br>30 <635.332 (p81)                                     | rate_local12 =0.005-0.097 (p45-77) | 47.80 | 0.70 | 25.62 | 0.14 | 1.355E-06 |
| med_area_home <18.611 (p56) &prop_gov_insti_faci =0.013-0.147 (p29-91)<br>31 &POI_den_edu <1024.661 (p91)                      | rate_local12 =0.005-0.149 (p45-87) | 61.61 | 0.70 | 25.61 | 0.05 | 6.69E-05  |
| 32 med_area_home <15.485 (p45) &POI_den_edu <628.086 (p81)                                                                     | rate_local12 =0.005-0.096 (p45-77) | 49.00 | 0.67 | 25.57 | 0.12 | 3.239E-06 |
| den_population >14298.147 (p45) &build_area_pp <61.172 (p50)<br>33 &POI_den_mall_mkt <420.564 (p84)                            | rate_local12 =0.005-0.113 (p45-81) | 47.19 | 0.77 | 25.50 | 0.13 | 7.112E-06 |
| med_area_home <17.787 (p55) &build_area_pp <61.308 (p50)<br>34 &POI_den_mall_mkt <420.564 (p84)                                | rate_local12 =0.004-0.105 (p45-80) | 47.40 | 0.73 | 25.47 | 0.11 | 4.477E-05 |
| 35 med_area_home <15.549 (p45) &POI_den_mall_mkt <301.051 (p78)                                                                | rate_local12 =0.005-0.101 (p45-78) | 48.58 | 0.69 | 25.45 | 0.13 | 1.529E-05 |
| gender_ratio =87.133-95.838 (p11-69) &prop_gov_insti_faci =0.028-0.140 (p39-<br>36 91) &POI_den_edu <709.299 (p82)             | rate_local12 =0.005-0.102 (p45-78) | 46.79 | 0.73 | 25.40 | 0.07 | 5.552E-05 |
| 37 prop_preprim_edu =0.080-0.134 (p19-84) &med_area_home <17.190 (p52)                                                         | rate_local12 =0.005-0.096 (p45-77) | 53.10 | 0.62 | 25.39 | 0.11 | 9.426E-06 |
| prop_preprim_edu =0.081-0.137 (p20-85) &build_area_pp <89.843 (p62)<br>38 &POI_den_transport <1475.696 (p79)                   | rate_local12 =0.005-0.095 (p45-77) | 50.91 | 0.64 | 25.39 | 0.09 | 2.008E-05 |
| 39 med_area_home <15.520 (p45) &POI_den_sports <785.405 (p78)                                                                  | rate_local12 =0.005-0.102 (p45-79) | 48.41 | 0.70 | 25.39 | 0.13 | 7.961E-06 |
| gender_ratio =86.919-97.765 (p11-77) &prop_preprim_edu =0.079-0.131 (p18-<br>40 83) &prop_gov_insti_faci =0.027-0.148 (p38-92) | rate_local12 =0.006-0.100 (p45-78) | 47.13 | 0.71 | 25.38 | 0.09 | 7.554E-05 |
| gender_ratio <97.028 (p75) &med_area_home <19.771 (p65)<br>41 &POI_den_mall_mkt <377.755 (p81)                                 | rate_local12 =0.005-0.096 (p45-77) | 54.91 | 0.60 | 25.37 | 0.07 | 6.913E-05 |
| med_area_home <22.436 (p80) &den_population >14968.054 (p46)<br>42 &POI_den_mall_mkt <344.016 (p80)                            | rate_local12 =0.005-0.106 (p45-80) | 48.93 | 0.70 | 25.36 | 0.06 | 6.944E-05 |
| den_population >14968.054 (p46) &build_area_pp <63.670 (p51)<br>43 &POI_den_telecom_elec <776.385 (p86)                        | rate_local12 =0.005-0.115 (p45-81) | 48.35 | 0.75 | 25.28 | 0.11 | 4.685E-05 |
| build_area_pp <90.225 (p62) &prop_transport >0.077 (p36) &POI_den_transport<br>44 <1565.639 (p81)                              | rate_local12 =0.005-0.096 (p45-77) | 46.74 | 0.70 | 25.26 | 0.14 | 2.331E-06 |

|                                                                                                            |                                    |       |      |       |      |           |
|------------------------------------------------------------------------------------------------------------|------------------------------------|-------|------|-------|------|-----------|
| gender_ratio =86.526-97.713 (p10-77) &prop_preprim_edu =0.083-0.132 (p23-83) &build_area_pp <120.964 (p76) | rate_local12 =0.005-0.108 (p45-81) | 53.67 | 0.65 | 25.21 | 0.07 | 6.911E-05 |
| med_area_home <20.365 (p67) &den_population >14308.702 (p45)                                               | rate_local12 =0.004-0.115 (p45-81) | 54.31 | 0.67 | 25.20 | 0.08 | 2.889E-05 |
| 46 &prop_business <0.064 (p87)                                                                             |                                    |       |      |       |      |           |
| 47 build_area_pp <61.021 (p50) &POI_den_transport =27.865-2265.299 (p12-90)                                | rate_local12 =0.005-0.106 (p45-81) | 54.09 | 0.64 | 25.17 | 0.09 | 4.499E-06 |
| 48 med_area_home <15.485 (p45) &POI_den_telecom_elec <451.899 (p77)                                        | rate_local12 =0.005-0.096 (p45-77) | 47.28 | 0.69 | 25.17 | 0.13 | 6.868E-06 |
| gender_ratio =86.694-98.115 (p11-78) &build_area_pp <83.408 (p58)                                          | rate_local12 =0.005-0.107 (p45-81) | 49.85 | 0.69 | 25.14 | 0.09 | 3.381E-05 |
| 49 &prop_transport >0.078 (p36)                                                                            |                                    |       |      |       |      |           |
| den_population >14968.054 (p46) &build_area_pp <60.895 (p50)                                               | rate_local12 =0.005-0.117 (p45-82) | 46.60 | 0.78 | 25.12 | 0.13 | 8.232E-06 |
| 50 &POI_den_sports <1154.560 (p84)                                                                         |                                    |       |      |       |      |           |
| build_area_pp <93.046 (p63) &prop_transport >0.075 (p36) &POI_den_sports                                   | rate_local12 =0.005-0.099 (p45-78) | 47.05 | 0.70 | 25.11 | 0.14 | 1.386E-06 |
| 51 <900.782 (p79)                                                                                          |                                    |       |      |       |      |           |
| prop_over65 =0.114-0.194 (p15-80) &gender_ratio =86.802-97.562 (p11-76)                                    | rate_local12 =0.006-0.094 (p45-77) | 47.78 | 0.67 | 25.11 | 0.10 | 8.208E-05 |
| 52 &med_area_home <19.908 (p65)                                                                            |                                    |       |      |       |      |           |
| med_area_home <22.436 (p80) &den_population >14968.054 (p46)                                               | rate_local12 =0.005-0.106 (p45-80) | 48.74 | 0.70 | 25.07 | 0.05 | 2.41E-05  |
| 53 &POI_den_telecom_elec <580.164 (p80)                                                                    |                                    |       |      |       |      |           |
| 54 med_area_home <15.717 (p46) &POI_den_transport <1281.420 (p77)                                          | rate_local12 =0.005-0.095 (p45-77) | 47.41 | 0.68 | 25.07 | 0.13 | 2.463E-06 |
| gender_ratio =87.078-97.412 (p11-76) &prop_gov_insti_faci =0.025-0.149 (p36-92)                            | rate_local12 =0.005-0.104 (p45-79) | 53.81 | 0.63 | 25.01 | 0.13 | 1.903E-07 |
| 55                                                                                                         |                                    |       |      |       |      |           |
| prop_preprim_edu =0.081-0.138 (p21-86) &prop_gov_insti_faci =0.025-0.143                                   | rate_local12 =0.005-0.100 (p45-78) | 52.08 | 0.63 | 24.94 | 0.13 | 3.104E-07 |
| 56 (p36-91)                                                                                                |                                    |       |      |       |      |           |
| 57 build_area_pp <58.503 (p48) &POI_den_edu <1049.012 (p91)                                                | rate_local12 =0.005-0.109 (p45-81) | 56.46 | 0.62 | 24.93 | 0.06 | 3.904E-05 |
| build_area_pp <58.503 (p48) &prop_gov_insti_faci =0.025-0.150 (p36-92)                                     | rate_local12 =0.005-0.099 (p45-78) | 43.62 | 0.76 | 24.89 | 0.12 | 5.007E-05 |
| 58 &POI_den_mall_mkt <444.965 (p86)                                                                        |                                    |       |      |       |      |           |
| build_area_pp <94.661 (p64) &prop_transport >0.055 (p33)                                                   | rate_local12 =0.005-0.092 (p45-77) | 47.69 | 0.66 | 24.85 | 0.14 | 4.578E-06 |
| 59 &POI_den_telecom_elec <499.056 (p78)                                                                    |                                    |       |      |       |      |           |
| den_population >14308.702 (p45) &build_area_pp <58.435 (p48) &POI_den_edu                                  | rate_local12 =0.005-0.114 (p45-81) | 46.09 | 0.77 | 24.85 | 0.13 | 1.044E-05 |
| 60 <716.583 (p83)                                                                                          |                                    |       |      |       |      |           |
| build_area_pp <61.172 (p50) &prop_gov_insti_faci =0.025-0.138 (p36-90)                                     | rate_local12 =0.005-0.111 (p45-81) | 44.79 | 0.78 | 24.82 | 0.11 | 2.153E-05 |
| 61 &POI_den_transport <1795.006 (p84)                                                                      |                                    |       |      |       |      |           |
| prop_preprim_edu =0.080-0.128 (p19-82) &build_area_pp <69.699 (p52)                                        | rate_local12 =0.005-0.101 (p45-78) | 47.57 | 0.69 | 24.77 | 0.10 | 4.259E-05 |
| 62 &POI_den_edu <596.553 (p80)                                                                             |                                    |       |      |       |      |           |
| prop_preprim_edu =0.079-0.130 (p18-83) &den_road >5.901 (p28)                                              | rate_local12 =0.005-0.093 (p45-77) | 50.31 | 0.62 | 24.71 | 0.10 | 2.342E-06 |
| 63 &POI_den_telecom_elec <591.098 (p80)                                                                    |                                    |       |      |       |      |           |

|                                                                                     |                                    |       |      |       |      |           |
|-------------------------------------------------------------------------------------|------------------------------------|-------|------|-------|------|-----------|
| prop_over65 =0.124-0.201 (p21-83) &med_area_home <17.338 (p52)                      | rate_local12 =0.005-0.113 (p45-81) | 46.41 | 0.75 | 24.66 | 0.10 | 2.519E-05 |
| <b>64</b> &prop_business <0.054 (p86)                                               |                                    |       |      |       |      |           |
| den_bldg >0.080 (p27) &build_area_pp <92.118 (p63) &POI_den_edu <685.349            | rate_local12 =0.006-0.103 (p45-79) | 50.30 | 0.66 | 24.62 | 0.11 | 6.437E-06 |
| <b>65</b> (p82)                                                                     |                                    |       |      |       |      |           |
| prop_preprim_edu =0.078-0.138 (p17-85) &build_area_pp <61.966 (p50)                 | rate_local12 =0.004-0.095 (p45-77) | 48.12 | 0.65 | 24.57 | 0.08 | 4.993E-05 |
| <b>66</b> &POI_den_telecom_elec <825.848 (p88)                                      |                                    |       |      |       |      |           |
| med_area_home <19.500 (p61) &prop_business <0.063 (p87) &prop_transport             | rate_local12 =0.006-0.109 (p45-81) | 52.60 | 0.65 | 24.54 | 0.10 | 7.55E-05  |
| <b>67</b> >0.076 (p36)                                                              |                                    |       |      |       |      |           |
| prop_preprim_edu =0.086-0.138 (p27-86) &med_area_home <19.252 (p61)                 | rate_local12 =0.005-0.090 (p45-77) | 45.33 | 0.68 | 24.50 | 0.12 | 1.013E-05 |
| <b>68</b> &POI_den_transport <1263.521 (p77)                                        |                                    |       |      |       |      |           |
| prop_preprim_edu =0.080-0.126 (p19-81) &den_road >5.313 (p26)                       | rate_local12 =0.005-0.097 (p45-77) | 50.37 | 0.63 | 24.46 | 0.10 | 6.204E-06 |
| <b>69</b> &POI_den_transport <1481.564 (p79)                                        |                                    |       |      |       |      |           |
| prop_preprim_edu =0.082-0.133 (p21-84) &den_population >14692.010 (p46)             | rate_local12 =0.004-0.104 (p45-80) | 45.49 | 0.73 | 24.46 | 0.10 | 2.975E-05 |
| <b>70</b> &POI_den_mall_mkt <365.673 (p81)                                          |                                    |       |      |       |      |           |
| <b>71</b> med_area_home <18.692 (p57) &build_area_pp <68.071 (p52)                  | rate_local12 =0.006-0.126 (p45-82) | 57.32 | 0.65 | 24.42 | 0.10 | 4.1E-05   |
| gender_ratio =87.051-98.202 (p11-78) &prop_preprim_edu =0.080-0.135 (p19-           | rate_local12 =0.005-0.103 (p45-79) | 59.16 | 0.57 | 24.42 | 0.11 | 3.323E-05 |
| <b>72</b> 84)                                                                       |                                    |       |      |       |      |           |
| den_population >16031.141 (p48) &build_area_pp <61.172 (p50)                        | rate_local12 =0.005-0.106 (p45-80) | 45.45 | 0.73 | 24.36 | 0.11 | 1.522E-05 |
| <b>73</b> &POI_den_transport <1927.571 (p85)                                        |                                    |       |      |       |      |           |
| den_bldg >0.083 (p29) &build_area_pp <90.579 (p62) &POI_den_mall_mkt                | rate_local12 =0.005-0.104 (p45-80) | 48.82 | 0.67 | 24.34 | 0.12 | 6.422E-05 |
| <b>74</b> <346.234 (p81)                                                            |                                    |       |      |       |      |           |
| med_area_home <20.056 (p67) &den_road >5.901 (p28) &POI_den_telecom_elec            | rate_local12 =0.005-0.095 (p45-77) | 50.16 | 0.62 | 24.33 | 0.11 | 1.226E-05 |
| <b>75</b> <591.098 (p80)                                                            |                                    |       |      |       |      |           |
| prop_preprim_edu =0.082-0.133 (p21-84) &den_population >14549.083 (p46)             | rate_local12 =0.005-0.099 (p45-78) | 45.09 | 0.71 | 24.32 | 0.10 | 3.251E-06 |
| <b>76</b> &POI_den_transport <1640.618 (p81)                                        |                                    |       |      |       |      |           |
| med_area_home <20.882 (p70) &den_population >15116.978 (p46)                        | rate_local12 =0.006-0.106 (p45-81) | 46.26 | 0.72 | 24.32 | 0.07 | 4.879E-05 |
| <b>77</b> &POI_den_transport <1378.863 (p78)                                        |                                    |       |      |       |      |           |
| med_income <20258.781 (p73) &den_population >14878.080 (p46)                        | rate_local12 =0.005-0.116 (p45-81) | 50.90 | 0.69 | 24.31 | 0.08 | 1.445E-05 |
| <b>78</b> &prop_business <0.059 (p87)                                               |                                    |       |      |       |      |           |
| prop_preprim_edu =0.081-0.132 (p20-83) &prop_transport >0.066 (p35)                 | rate_local12 =0.005-0.091 (p45-77) | 48.43 | 0.63 | 24.30 | 0.10 | 3.328E-05 |
| <b>79</b> &POI_den_telecom_elec <664.424 (p82)                                      |                                    |       |      |       |      |           |
| <b>80</b> prop_gov_insti_faci =0.025-0.143 (p36-91) &POI_den_sports <1542.023 (p90) | rate_local12 =0.004-0.127 (p45-83) | 62.74 | 0.62 | 24.29 | 0.06 | 2.641E-05 |
| den_bldg >0.079 (p27) &build_area_pp <95.175 (p64) &POI_den_sports                  | rate_local12 =0.006-0.102 (p45-78) | 49.68 | 0.65 | 24.29 | 0.12 | 1.85E-05  |
| <b>81</b> <991.027 (p81)                                                            |                                    |       |      |       |      |           |

|                                                                                 |                                    |       |      |       |      |           |
|---------------------------------------------------------------------------------|------------------------------------|-------|------|-------|------|-----------|
| prop_preprim_edu =0.081-0.132 (p20-83) &med_area_home <15.638 (p45)             | rate_local12 =0.005-0.090 (p45-77) | 40.46 | 0.77 | 24.28 | 0.10 | 3.971E-05 |
| <b>82</b> &LU_entropy >0.546 (p47)                                              |                                    |       |      |       |      |           |
| build_area_pp <53.930 (p44) &prop_gov_insti_faci =0.024-0.143 (p35-91)          | rate_local12 =0.005-0.108 (p45-81) | 43.39 | 0.78 | 24.26 | 0.11 | 2.902E-05 |
| <b>83</b> &POI_den_sports <1267.682 (p85)                                       |                                    |       |      |       |      |           |
| prop_preprim_edu =0.081-0.129 (p20-82) &build_area_pp <67.864 (p52)             | rate_local12 =0.006-0.102 (p45-79) | 46.89 | 0.69 | 24.22 | 0.10 | 6.7E-05   |
| <b>84</b> &POI_den_mall_mkt <386.588 (p81)                                      |                                    |       |      |       |      |           |
| med_area_home <20.485 (p68) &den_road >5.901 (p28) &POI_den_mall_mkt            | rate_local12 =0.005-0.100 (p45-78) | 50.93 | 0.63 | 24.20 | 0.12 | 1.125E-05 |
| <b>85</b> <327.353 (p79)                                                        |                                    |       |      |       |      |           |
| prop_over65 =0.116-0.183 (p16-72) &prop_preprim_edu =0.080-0.133 (p19-84)       | rate_local12 =0.005-0.121 (p45-82) | 48.16 | 0.74 | 24.18 | 0.10 | 4.717E-06 |
| <b>86</b> &build_area_pp <107.621 (p71)                                         |                                    |       |      |       |      |           |
| <b>87</b> gender_ratio =87.078-97.412 (p11-76) &den_population >14870.710 (p46) | rate_local12 =0.006-0.104 (p45-80) | 53.34 | 0.61 | 24.14 | 0.12 | 2.306E-06 |
|                                                                                 |                                    |       |      |       |      |           |
| <b>88</b> prop_gov_insti_faci =0.025-0.143 (p36-91) &POI_den_edu <993.101 (p91) | rate_local12 =0.004-0.131 (p45-83) | 63.47 | 0.62 | 24.13 | 0.06 | 5.862E-05 |
| prop_preprim_edu =0.082-0.133 (p21-84) &den_population >14549.083 (p46)         | rate_local12 =0.005-0.105 (p45-80) | 44.73 | 0.73 | 24.11 | 0.10 | 7.059E-05 |
| <b>89</b> &POI_den_edu <592.070 (p80)                                           |                                    |       |      |       |      |           |
| <b>90</b> prop_over65 =0.115-0.177 (p15-67) &med_area_home <17.474 (p52)        | rate_local12 =0.006-0.157 (p45-88) | 49.15 | 0.82 | 24.11 | 0.21 | 7.398E-08 |
| med_area_home <18.171 (p55) &prop_gov_insti_faci =0.025-0.138 (p36-90)          | rate_local12 =0.005-0.088 (p45-76) | 42.96 | 0.70 | 24.11 | 0.11 | 3.603E-05 |
| <b>91</b> &POI_den_mall_mkt <312.138 (p78)                                      |                                    |       |      |       |      |           |
| med_area_home <20.097 (p67) &den_road >6.094 (p29) &prop_business <0.062        | rate_local12 =0.005-0.118 (p45-82) | 56.79 | 0.63 | 24.08 | 0.08 | 7.078E-05 |
| <b>92</b> (p87)                                                                 |                                    |       |      |       |      |           |
| prop_preprim_edu =0.081-0.132 (p20-84) &den_road >5.613 (p27)                   | rate_local12 =0.005-0.098 (p45-77) | 50.97 | 0.62 | 24.08 | 0.09 | 8.257E-05 |
| <b>93</b> &POI_den_edu <693.439 (p82)                                           |                                    |       |      |       |      |           |
| prop_over65 =0.123-0.196 (p21-80) &prop_preprim_edu =0.079-0.136 (p18-85)       | rate_local12 =0.005-0.099 (p45-78) | 46.54 | 0.68 | 24.03 | 0.09 | 4.361E-05 |
| <b>94</b> &med_area_home <19.662 (p64)                                          |                                    |       |      |       |      |           |
| <b>95</b> gender_ratio =86.780-98.004 (p11-78) &build_area_pp <93.535 (p63)     | rate_local12 =0.005-0.107 (p45-81) | 59.84 | 0.57 | 24.01 | 0.10 | 6.367E-05 |
| prop_preprim_edu =0.081-0.130 (p20-83) &prop_transport >0.055 (p33)             | rate_local12 =0.005-0.098 (p45-77) | 49.08 | 0.64 | 23.99 | 0.10 | 4.875E-05 |
| <b>96</b> &POI_den_edu <623.970 (p81)                                           |                                    |       |      |       |      |           |
| med_area_home <17.992 (p55) &prop_gov_insti_faci =0.025-0.138 (p36-90)          | rate_local12 =0.005-0.105 (p45-80) | 44.27 | 0.74 | 23.98 | 0.12 | 5.021E-05 |
| <b>97</b> &POI_den_sports <809.146 (p78)                                        |                                    |       |      |       |      |           |
| <b>98</b> den_population >15691.896 (p47) &POI_den_edu <635.332 (p81)           | rate_local12 =0.006-0.102 (p45-78) | 50.07 | 0.64 | 23.97 | 0.14 | 8.013E-08 |
| med_area_home <17.655 (p54) &den_bldg =0.071-0.351 (p25-79) &POI_den_edu        | rate_local12 =0.004-0.096 (p45-77) | 43.25 | 0.72 | 23.97 | 0.08 | 6.009E-05 |
| <b>99</b> <609.144 (p81)                                                        |                                    |       |      |       |      |           |
| gender_ratio =87.188-97.999 (p11-78) &prop_open_recreation =0.019-0.142 (p37-   | rate_local12 =0.005-0.106 (p45-81) | 48.64 | 0.67 | 23.93 | 0.17 | 9.105E-09 |
| <b>100</b> 88)                                                                  |                                    |       |      |       |      |           |

|     |                                                                                                           |                                    |       |      |       |      |           |
|-----|-----------------------------------------------------------------------------------------------------------|------------------------------------|-------|------|-------|------|-----------|
| 101 | med_area_home <20.056 (p67) &den_road >5.901 (p28) &POI_den_edu <612.902 (p81)                            | rate_local12 =0.005-0.102 (p45-79) | 51.03 | 0.63 | 23.92 | 0.11 | 7.922E-06 |
| 102 | den_bldg >0.080 (p27) &build_area_pp <92.118 (p63) &POI_den_transport <1280.897 (p77)                     | rate_local12 =0.005-0.100 (p45-78) | 46.99 | 0.67 | 23.91 | 0.13 | 2.919E-05 |
| 103 | med_area_home <19.500 (p61) &prop_transport >0.076 (p36) &POI_den_mall_mkt <316.409 (p79)                 | rate_local12 =0.005-0.095 (p45-77) | 45.51 | 0.67 | 23.90 | 0.12 | 6.316E-05 |
| 104 | gender_ratio <95.235 (p65) &prop_gov_insti_faci =0.025-0.142 (p36-91) &POI_den_sports <995.228 (p81)      | rate_local12 =0.005-0.095 (p45-77) | 45.71 | 0.67 | 23.89 | 0.10 | 1.874E-05 |
| 105 | prop_preprim_edu =0.080-0.126 (p19-81) &den_road >5.313 (p26) &POI_den_sports <783.545 (p78)              | rate_local12 =0.005-0.097 (p45-77) | 48.60 | 0.64 | 23.88 | 0.11 | 7.836E-05 |
| 106 | med_area_home <20.908 (p70) &prop_gov_insti_faci =0.018-0.135 (p32-90) &POI_den_transport <1208.412 (p77) | rate_local12 =0.005-0.090 (p45-77) | 46.08 | 0.64 | 23.82 | 0.09 | 7.874E-05 |
| 107 | med_area_home <18.611 (p56) &prop_gov_insti_faci =0.018-0.133 (p32-90)                                    | rate_local12 =0.005-0.112 (p45-81) | 55.01 | 0.62 | 23.80 | 0.10 | 1.066E-05 |
| 108 | prop_preprim_edu =0.081-0.138 (p21-86) &build_area_pp <100.058 (p67)                                      | rate_local12 =0.006-0.129 (p45-83) | 63.74 | 0.61 | 23.76 | 0.10 | 2.801E-06 |
| 109 | den_population >16619.203 (p49) &POI_den_mall_mkt <284.016 (p78)                                          | rate_local12 =0.005-0.104 (p45-80) | 46.81 | 0.68 | 23.72 | 0.18 | 1.293E-07 |
| 110 | den_population >15589.742 (p47) &POI_den_telecom_elec <459.162 (p77)                                      | rate_local12 =0.006-0.103 (p45-79) | 47.31 | 0.67 | 23.71 | 0.17 | 1.29E-08  |
| 111 | den_population >15024.709 (p46) &POI_den_sports <785.405 (p78)                                            | rate_local12 =0.005-0.104 (p45-80) | 48.29 | 0.66 | 23.65 | 0.16 | 2.927E-07 |
| 112 | den_public_trans >17.266 (p51) &build_area_pp <92.372 (p63) &POI_den_telecom_elec <667.276 (p82)          | rate_local12 =0.005-0.102 (p45-79) | 42.95 | 0.74 | 23.65 | 0.14 | 3.522E-05 |
| 113 | build_area_pp <62.260 (p50) &POI_den_telecom_elec <757.100 (p85)                                          | rate_local12 =0.006-0.100 (p45-78) | 52.59 | 0.60 | 23.65 | 0.07 | 7.772E-05 |
| 114 | den_public_trans >17.104 (p50) &build_area_pp <85.758 (p60) &POI_den_edu <633.888 (p81)                   | rate_local12 =0.005-0.104 (p45-80) | 41.89 | 0.77 | 23.60 | 0.16 | 2.926E-05 |
| 115 | med_area_home <19.500 (p61) &prop_transport >0.076 (p36) &POI_den_transport <1281.473 (p77)               | rate_local12 =0.003-0.091 (p45-77) | 43.89 | 0.68 | 23.57 | 0.12 | 3.547E-05 |
| 116 | prop_preprim_edu =0.081-0.128 (p20-82) &prop_transport >0.063 (p35) &POI_den_mall_mkt <316.461 (p79)      | rate_local12 =0.006-0.099 (p45-78) | 46.74 | 0.66 | 23.52 | 0.12 | 6.808E-05 |
| 117 | den_road =7.045-24.181 (p34-88) &build_area_pp <82.481 (p58)                                              | rate_local12 =0.006-0.106 (p45-80) | 49.54 | 0.65 | 23.50 | 0.16 | 2.158E-06 |
| 118 | den_public_trans >17.779 (p52) &build_area_pp <85.318 (p60) &POI_den_mall_mkt <387.886 (p81)              | rate_local12 =0.005-0.105 (p45-80) | 41.90 | 0.77 | 23.50 | 0.15 | 3.347E-06 |
| 119 | gender_ratio <95.675 (p69) &med_area_home <19.849 (p65) &POI_den_sports <991.027 (p81)                    | rate_local12 =0.005-0.090 (p45-77) | 49.18 | 0.59 | 23.50 | 0.08 | 7.146E-05 |
| 120 | med_area_home <19.500 (p61) &prop_transport >0.076 (p36) &POI_den_sports <834.276 (p78)                   | rate_local12 =0.006-0.095 (p45-77) | 44.78 | 0.67 | 23.45 | 0.11 | 8.057E-05 |

|                                                                                                                                 |                                    |       |      |       |      |           |
|---------------------------------------------------------------------------------------------------------------------------------|------------------------------------|-------|------|-------|------|-----------|
| gender_ratio =85.828-99.276 (p10-79) &prop_gov_insti_faci =0.022-0.148 (p33-121 92) &prop_open_recreation =0.020-0.135 (p39-87) | rate_local12 =0.005-0.097 (p45-77) | 42.56 | 0.72 | 23.40 | 0.08 | 5.909E-05 |
| prop_higher_edu <0.362 (p85) &prop_transport >0.055 (p32) &POI_den_edu <1016.048 (p91)                                          | rate_local12 =0.006-0.106 (p45-81) | 60.21 | 0.56 | 23.38 | 0.06 | 7.872E-05 |
| 123 build_area_pp <60.752 (p50) &prop_open_recreation =0.017-0.133 (p36-86)                                                     | rate_local12 =0.004-0.132 (p45-83) | 46.88 | 0.77 | 23.38 | 0.18 | 5.232E-07 |
| gender_ratio =85.267-98.835 (p10-78) &prop_preprim_edu =0.082-0.133 (p21-124 84) &prop_open_recreation >0.027 (p46)             | rate_local12 =0.005-0.102 (p45-79) | 45.13 | 0.69 | 23.37 | 0.09 | 3.559E-05 |
| prop_over65 =0.124-0.191 (p21-77) &build_area_pp <97.025 (p65)                                                                  | rate_local12 =0.005-0.102 (p45-78) | 45.13 | 0.69 | 23.34 | 0.09 | 6.606E-06 |
| 125 &POI_den_transport =27.865-2265.299 (p12-90)                                                                                | rate_local12 =0.005-0.096 (p45-77) | 45.56 | 0.66 | 23.34 | 0.12 | 2.246E-05 |
| prop_preprim_edu =0.080-0.129 (p19-82) &den_road >7.114 (p34)                                                                   | rate_local12 =0.005-0.097 (p45-77) | 45.40 | 0.67 | 23.31 | 0.18 | 7.138E-08 |
| 126 &POI_den_mall_mkt <327.350 (p79)                                                                                            | rate_local12 =0.005-0.099 (p45-78) | 51.03 | 0.60 | 23.31 | 0.07 | 2.437E-05 |
| 127 den_population >16816.044 (p49) &POI_den_transport <1281.420 (p77)                                                          | rate_local12 =0.005-0.104 (p45-79) | 49.92 | 0.63 | 23.31 | 0.06 | 1.211E-05 |
| prop_higher_edu <0.383 (p87) &den_road >7.114 (p34) &POI_den_transport <1528.257 (p80)                                          | rate_local12 =0.004-0.103 (p45-79) | 41.22 | 0.77 | 23.27 | 0.16 | 1.556E-06 |
| gender_ratio =87.078-97.412 (p11-76) &prop_preprim_edu >0.081 (p20)                                                             | rate_local12 =0.005-0.100 (p45-78) | 49.21 | 0.62 | 23.25 | 0.11 | 5.827E-05 |
| 129 &prop_transport >0.066 (p35)                                                                                                | rate_local12 =0.005-0.088 (p45-76) | 43.39 | 0.66 | 23.23 | 0.16 | 1.516E-06 |
| den_public_trans >17.779 (p52) &build_area_pp <85.318 (p60) &POI_den_sports <1029.490 (p82)                                     | rate_local12 =0.005-0.109 (p45-81) | 51.75 | 0.63 | 23.22 | 0.12 | 2.014E-05 |
| med_area_home <20.485 (p68) &den_bldg >0.078 (p27) &POI_den_mall_mkt <298.672 (p78)                                             | rate_local12 =0.004-0.094 (p45-77) | 41.30 | 0.73 | 23.19 | 0.10 | 6.843E-05 |
| 132 med_area_home <16.550 (p50) &LU_entropy >0.549 (p48)                                                                        | rate_local12 =0.006-0.102 (p45-78) | 50.56 | 0.61 | 23.18 | 0.09 | 6.929E-05 |
| 133 build_area_pp <79.448 (p56) &prop_gov_insti_faci =0.019-0.134 (p32-90)                                                      | rate_local12 =0.006-0.121 (p45-82) | 55.20 | 0.63 | 23.12 | 0.11 | 7.498E-05 |
| prop_over65 =0.124-0.191 (p21-77) &med_area_home <17.474 (p52)                                                                  | rate_local12 =0.005-0.124 (p45-82) | 49.69 | 0.69 | 23.09 | 0.09 | 5.379E-05 |
| 134 &POI_den_transport <1675.179 (p82)                                                                                          | rate_local12 =0.005-0.099 (p45-78) | 39.80 | 0.78 | 23.08 | 0.14 | 1.441E-05 |
| gender_ratio <95.675 (p69) &build_area_pp <95.175 (p64) &POI_den_sports <991.027 (p81)                                          | rate_local12 =0.005-0.089 (p45-76) | 43.21 | 0.66 | 23.07 | 0.13 | 3.699E-05 |
| 136 den_population >14308.702 (p45) &build_area_pp <79.259 (p56)                                                                |                                    |       |      |       |      |           |
| gender_ratio =86.919-97.765 (p11-77) &prop_household_3gen =0.017-0.065 (p15-137 87) &prop_gov_insti_faci >0.034 (p43)           |                                    |       |      |       |      |           |
| build_area_pp <60.752 (p50) &prop_open_recreation >0.028 (p47)                                                                  |                                    |       |      |       |      |           |
| 138 &POI_den_mall_mkt <422.918 (p84)                                                                                            |                                    |       |      |       |      |           |
| med_area_home <19.500 (p61) &prop_open_recreation >0.026 (p45)                                                                  |                                    |       |      |       |      |           |
| 139 &POI_den_mall_mkt <332.133 (p79)                                                                                            |                                    |       |      |       |      |           |



|                                                                              |                                    |       |      |       |      |           |
|------------------------------------------------------------------------------|------------------------------------|-------|------|-------|------|-----------|
| prop_preprim_edu =0.084-0.144 (p24-89) &den_bldg >0.084 (p29)                | rate_local12 =0.005-0.091 (p45-77) | 48.27 | 0.60 | 23.07 | 0.10 | 1.495E-05 |
| <b>140</b> &POI_den_mall_mkt <380.696 (p81)                                  |                                    |       |      |       |      |           |
| build_area_pp <60.752 (p50) &prop_open_recreation >0.028 (p47)               | rate_local12 =0.005-0.099 (p45-78) | 40.68 | 0.76 | 23.01 | 0.11 | 1.178E-05 |
| <b>141</b> &POI_den_transport <1980.133 (p86)                                |                                    |       |      |       |      |           |
| gender_ratio <95.784 (p69) &build_area_pp <98.252 (p66) &POI_den_mall_mkt    | rate_local12 =0.005-0.099 (p45-78) | 50.39 | 0.60 | 23.00 | 0.09 | 7.146E-05 |
| <b>142</b> <375.689 (p81)                                                    |                                    |       |      |       |      |           |
| <b>143</b> build_area_pp <90.579 (p62) &prop_transport >0.073 (p36)          | rate_local12 =0.005-0.109 (p45-81) | 55.92 | 0.59 | 22.97 | 0.11 | 4.923E-05 |
| prop_over65 =0.120-0.197 (p19-80) &med_area_home <19.558 (p62)               | rate_local12 =0.005-0.101 (p45-78) | 45.27 | 0.67 | 22.93 | 0.08 | 3.361E-06 |
| <b>144</b> &POI_den_telecom_elec <596.572 (p80)                              |                                    |       |      |       |      |           |
| <b>145</b> gender_ratio =86.694-98.115 (p11-78) &prop_transport >0.078 (p36) | rate_local12 =0.005-0.104 (p45-80) | 55.47 | 0.57 | 22.89 | 0.11 | 1.247E-05 |
| prop_over65 =0.124-0.192 (p21-78) &med_area_home <19.126 (p61)               | rate_local12 =0.005-0.099 (p45-78) | 42.88 | 0.70 | 22.86 | 0.10 | 3.968E-05 |
| <b>146</b> &POI_den_mall_mkt <373.855 (p81)                                  |                                    |       |      |       |      |           |
| <b>147</b> gender_ratio =87.315-99.297 (p11-79) &den_road >5.711 (p27)       | rate_local12 =0.005-0.102 (p45-78) | 60.92 | 0.53 | 22.85 | 0.08 | 5.979E-06 |
| gender_ratio =87.595-102.374 (p11-88) &prop_higher_edu <0.314 (p77)          | rate_local12 =0.005-0.102 (p45-78) | 49.56 | 0.62 | 22.84 | 0.09 | 4.579E-05 |
| <b>148</b> &den_road >7.378 (p35)                                            |                                    |       |      |       |      |           |
| build_area_pp <60.752 (p50) &prop_open_recreation >0.027 (p45)               | rate_local12 =0.005-0.099 (p45-78) | 39.13 | 0.79 | 22.83 | 0.15 | 3.78E-06  |
| <b>149</b> &POI_den_edu <608.393 (p81)                                       |                                    |       |      |       |      |           |
| <b>150</b> den_population >14878.080 (p46) &prop_business <0.059 (p87)       | rate_local12 =0.005-0.116 (p45-81) | 56.62 | 0.60 | 22.82 | 0.08 | 2.504E-05 |
| build_area_pp <60.752 (p50) &prop_open_recreation >0.028 (p47)               | rate_local12 =0.005-0.101 (p45-78) | 39.25 | 0.79 | 22.79 | 0.14 | 1.912E-05 |
| <b>151</b> &POI_den_sports <1120.275 (p83)                                   |                                    |       |      |       |      |           |
| prop_higher_edu <0.309 (p76) &prop_gov_insti_faci =0.023-0.131 (p33-89)      | rate_local12 =0.005-0.114 (p45-81) | 42.68 | 0.76 | 22.77 | 0.13 | 9.449E-07 |
| <b>152</b> &prop_open_recreation =0.013-0.127 (p33-84)                       |                                    |       |      |       |      |           |
| prop_over65 =0.120-0.187 (p20-75) &den_road >5.249 (p25) &build_area_pp      | rate_local12 =0.005-0.121 (p45-82) | 44.58 | 0.75 | 22.76 | 0.08 | 8.197E-06 |
| <b>153</b> <84.736 (p59)                                                     |                                    |       |      |       |      |           |
| gender_ratio <95.784 (p69) &build_area_pp <98.252 (p66)                      | rate_local12 =0.006-0.097 (p45-77) | 49.16 | 0.60 | 22.70 | 0.09 | 5.582E-05 |
| <b>154</b> &POI_den_telecom_elec <597.752 (p80)                              |                                    |       |      |       |      |           |
| build_area_pp <64.348 (p51) &prop_gov_insti_faci =0.025-0.143 (p36-91)       | rate_local12 =0.004-0.127 (p45-83) | 42.66 | 0.81 | 22.65 | 0.12 | 6.622E-05 |
| <b>155</b> &POI_den_telecom_elec <462.307 (p77)                              |                                    |       |      |       |      |           |
| <b>156</b> build_area_pp <94.048 (p63) &LU_entropy >0.548 (p47)              | rate_local12 =0.005-0.097 (p45-77) | 46.45 | 0.63 | 22.62 | 0.17 | 2.138E-07 |
| prop_higher_edu <0.324 (p79) &den_road >6.934 (p33) &POI_den_mall_mkt        | rate_local12 =0.005-0.095 (p45-77) | 48.79 | 0.60 | 22.56 | 0.09 | 5.86E-05  |
| <b>157</b> <390.782 (p82)                                                    |                                    |       |      |       |      |           |
| prop_gov_insti_faci =0.025-0.138 (p36-90) &POI_den_transport <1237.047 (p77) | rate_local12 =0.005-0.103 (p45-79) | 49.90 | 0.61 | 22.56 | 0.11 | 5.851E-05 |
| prop_preprim_edu =0.081-0.125 (p20-81) &prop_open_recreation >0.029 (p47)    | rate_local12 =0.005-0.097 (p45-77) | 41.83 | 0.70 | 22.53 | 0.13 | 2.411E-05 |
| <b>159</b> &POI_den_mall_mkt <308.017 (p78)                                  |                                    |       |      |       |      |           |

|                                                                                     |                                    |       |      |       |      |           |
|-------------------------------------------------------------------------------------|------------------------------------|-------|------|-------|------|-----------|
| prop_over65 =0.117-0.182 (p17-71) &prop_preprim_edu >0.077 (p16)                    | rate_local12 =0.004-0.135 (p45-84) | 43.99 | 0.80 | 22.52 | 0.10 | 7.031E-07 |
| <b>160</b> &den_population >15589.742 (p47)                                         |                                    |       |      |       |      |           |
| <b>161</b> med_area_home <15.950 (p47)                                              | rate_local12 =0.005-0.132 (p45-83) | 59.87 | 0.62 | 22.42 | 0.23 | 3.443E-13 |
| med_area_home <19.988 (p65) &prop_open_recreation >0.027 (p46)                      |                                    |       |      |       |      |           |
| <b>162</b> &POI_den_transport <1199.840 (p77)                                       | rate_local12 =0.004-0.092 (p45-77) | 41.65 | 0.68 | 22.42 | 0.13 | 3.791E-05 |
| med_area_home <18.718 (p57) &den_bldg =0.071-0.351 (p25-79)                         |                                    |       |      |       |      |           |
| <b>163</b> &POI_den_telecom_elec <184.109 (p60)                                     | rate_local12 =0.005-0.095 (p45-77) | 37.89 | 0.78 | 22.35 | 0.16 | 7.28E-06  |
| prop_gov_insti_faci =0.023-0.146 (p33-91) &prop_open_recreation >0.026 (p45)        |                                    |       |      |       |      |           |
| <b>164</b> &POI_den_mall_mkt <399.371 (p83)                                         | rate_local12 =0.005-0.093 (p45-77) | 43.94 | 0.64 | 22.34 | 0.09 | 3.523E-05 |
| prop_gov_insti_faci =0.022-0.148 (p33-92) &prop_open_recreation =0.020-0.135        |                                    |       |      |       |      |           |
| <b>165</b> (p39-87) &POI_den_sports <896.109 (p79)                                  | rate_local12 =0.005-0.091 (p45-77) | 39.59 | 0.72 | 22.33 | 0.12 | 1.005E-05 |
| prop_gov_insti_faci =0.018-0.135 (p32-90) &prop_open_recreation =0.020-0.135        |                                    |       |      |       |      |           |
| <b>166</b> (p39-87) &POI_den_telecom_elec <551.719 (p79)                            | rate_local12 =0.006-0.091 (p45-77) | 39.45 | 0.71 | 22.21 | 0.11 | 1.931E-05 |
| prop_higher_edu <0.324 (p79) &den_road >6.934 (p33) &POI_den_sports                 |                                    |       |      |       |      |           |
| <b>167</b> <1215.425 (p84)                                                          | rate_local12 =0.005-0.088 (p45-76) | 48.13 | 0.57 | 22.18 | 0.09 | 7.291E-05 |
| med_income <20838.946 (p73) &prop_business <0.057 (p86)                             |                                    |       |      |       |      |           |
| <b>168</b> &prop_open_recreation =0.013-0.128 (p33-85)                              | rate_local12 =0.005-0.110 (p45-81) | 44.32 | 0.70 | 22.17 | 0.09 | 4.086E-05 |
| prop_preprim_edu =0.080-0.133 (p19-84) &prop_open_recreation =0.020-0.143           |                                    |       |      |       |      |           |
| <b>169</b> (p38-88)                                                                 | rate_local12 =0.005-0.121 (p45-82) | 50.59 | 0.65 | 22.14 | 0.12 | 5.217E-05 |
| prop_preprim_edu =0.082-0.133 (p21-84) &den_population >14549.083 (p46)             |                                    |       |      |       |      |           |
| <b>170</b> med_area_home <20.858 (p70) &den_bldg >0.100 (p33) &prop_business <0.064 | rate_local12 =0.005-0.113 (p45-81) | 51.67 | 0.62 | 22.09 | 0.10 | 7.629E-05 |
| <b>171</b> (p87)                                                                    | rate_local12 =0.006-0.109 (p45-81) | 52.84 | 0.59 | 22.06 | 0.08 | 3.871E-05 |
| med_area_home <17.675 (p54) &den_bldg =0.071-0.351 (p25-79)                         |                                    |       |      |       |      |           |
| <b>172</b> &POI_den_transport <518.406 (p64)                                        | rate_local12 =0.006-0.092 (p45-77) | 37.04 | 0.77 | 21.98 | 0.13 | 2.038E-05 |
| <b>173</b> med_area_home <17.675 (p54) &den_bldg =0.071-0.351 (p25-79)              | rate_local12 =0.005-0.091 (p45-77) | 43.19 | 0.64 | 21.98 | 0.15 | 1.823E-05 |
| <b>174</b> prop_over65 =0.132-0.182 (p28-71) &build_area_pp <66.434 (p52)           | rate_local12 =0.005-0.136 (p45-86) | 41.80 | 0.83 | 21.97 | 0.25 | 1.848E-08 |
| prop_gov_insti_faci =0.023-0.146 (p33-91) &prop_open_recreation >0.026 (p45)        |                                    |       |      |       |      |           |
| <b>175</b> &POI_den_edu <590.665 (p80)                                              | rate_local12 =0.005-0.095 (p45-77) | 42.72 | 0.66 | 21.95 | 0.10 | 4.216E-05 |
| prop_higher_edu <0.308 (p76) &prop_open_recreation =0.020-0.136 (p39-87)            |                                    |       |      |       |      |           |
| <b>176</b> build_area_pp <76.435 (p55) &prop_open_recreation >0.028 (p47)           | rate_local12 =0.006-0.126 (p45-82) | 50.32 | 0.66 | 21.94 | 0.11 | 1.04E-05  |
| <b>177</b> &POI_den_telecom_elec <579.555 (p80)                                     | rate_local12 =0.005-0.099 (p45-78) | 39.46 | 0.74 | 21.92 | 0.14 | 7.307E-05 |
| prop_preprim_edu >0.076 (p16) &den_public_trans >19.183 (p54)                       |                                    |       |      |       |      |           |
| <b>178</b> &prop_business <0.051 (p86)                                              | rate_local12 =0.005-0.114 (p45-81) | 45.35 | 0.69 | 21.91 | 0.08 | 7.036E-06 |

|                                                                                      |                                    |       |      |       |      |           |
|--------------------------------------------------------------------------------------|------------------------------------|-------|------|-------|------|-----------|
| <b>179</b> prop_preprim_edu =0.082-0.133 (p21-84) &den_road =6.118-24.410 (p29-89)   | rate_local12 =0.004-0.101 (p45-78) | 50.56 | 0.58 | 21.91 | 0.12 | 9.934E-06 |
| <b>180</b> prop_over65 =0.118-0.180 (p17-71) &prop_preprim_edu =0.080-0.128 (p19-82) | rate_local12 =0.006-0.139 (p45-86) | 51.40 | 0.69 | 21.89 | 0.16 | 4.205E-05 |
| <b>181</b> prop_higher_edu <0.345 (p82) &den_road =7.251-22.038 (p34-86)             | rate_local12 =0.005-0.105 (p45-80) | 50.58 | 0.60 | 21.86 | 0.10 | 4.416E-05 |
| gender_ratio <94.290 (p58) &prop_preprim_edu =0.079-0.130 (p18-83)                   | rate_local12 =0.005-0.094 (p45-77) | 46.69 | 0.60 | 21.85 | 0.08 | 5.562E-05 |
| <b>182</b> &POI_den_edu <713.517 (p82)                                               | rate_local12 =0.005-0.104 (p45-80) | 41.42 | 0.71 | 21.84 | 0.13 | 4.325E-06 |
| prop_preprim_edu =0.080-0.125 (p19-81) &prop_open_recreation >0.029 (p47)            | rate_local12 =0.005-0.104 (p45-80) | 41.42 | 0.71 | 21.84 | 0.13 | 4.325E-06 |
| <b>183</b> &POI_den_sports <785.405 (p78)                                            | rate_local12 =0.005-0.096 (p45-77) | 50.19 | 0.57 | 21.78 | 0.13 | 6.691E-07 |
| <b>184</b> prop_transport >0.088 (p38) &POI_den_edu <628.086 (p81)                   | rate_local12 =0.005-0.113 (p45-81) | 44.88 | 0.69 | 21.75 | 0.06 | 8.032E-05 |
| den_public_trans >20.695 (p55) &prop_business <0.053 (p86)                           | rate_local12 =0.006-0.105 (p45-80) | 41.06 | 0.72 | 21.70 | 0.11 | 8.326E-05 |
| <b>185</b> &POI_den_mall_mkt <539.883 (p90)                                          | rate_local12 =0.004-0.098 (p45-77) | 43.43 | 0.65 | 21.68 | 0.10 | 3.856E-05 |
| med_income <19466.460 (p63) &prop_gov_insti_faci =0.021-0.133 (p33-90)               | rate_local12 =0.005-0.100 (p45-78) | 41.25 | 0.69 | 21.66 | 0.12 | 2.435E-05 |
| <b>186</b> &prop_open_recreation =0.013-0.128 (p33-85)                               | rate_local12 =0.006-0.138 (p45-86) | 42.70 | 0.79 | 21.46 | 0.11 | 5.292E-05 |
| gender_ratio <95.675 (p69) &prop_open_recreation >0.027 (p46)                        | rate_local12 =0.005-0.090 (p45-77) | 42.01 | 0.63 | 21.43 | 0.16 | 1.055E-05 |
| <b>187</b> &POI_den_sports <991.027 (p81)                                            | rate_local12 =0.005-0.120 (p45-82) | 48.86 | 0.65 | 21.41 | 0.14 | 1.121E-05 |
| prop_preprim_edu =0.081-0.123 (p20-80) &prop_open_recreation >0.026 (p45)            | rate_local12 =0.005-0.097 (p45-77) | 41.95 | 0.66 | 21.38 | 0.19 | 6.688E-07 |
| <b>188</b> &POI_den_transport <1390.516 (p79)                                        | rate_local12 =0.005-0.099 (p45-78) | 41.34 | 0.68 | 21.38 | 0.07 | 3.968E-05 |
| prop_over65 =0.115-0.177 (p15-67) &prop_preprim_edu =0.081-0.136 (p20-85)            | rate_local12 =0.005-0.102 (p45-79) | 49.20 | 0.59 | 21.35 | 0.13 | 2.899E-06 |
| <b>189</b> &prop_gov_insti_faci =0.011-0.122 (p24-87)                                | rate_local12 =0.005-0.114 (p45-81) | 52.86 | 0.59 | 21.13 | 0.12 | 2.14E-05  |
| <b>190</b> prop_gov_insti_faci =0.025-0.136 (p36-90) &LU_entropy >0.553 (p49)        | rate_local12 =0.005-0.090 (p45-77) | 42.01 | 0.63 | 21.43 | 0.16 | 1.055E-05 |
| <b>191</b> den_public_trans >17.558 (p52) &build_area_pp <86.476 (p61)               | rate_local12 =0.005-0.090 (p45-77) | 36.25 | 0.74 | 21.13 | 0.07 | 5.086E-05 |
| <b>192</b> den_population >14700.561 (p46) &LU_entropy >0.552 (p49)                  | rate_local12 =0.005-0.114 (p45-81) | 47.23 | 0.64 | 21.05 | 0.14 | 2.624E-06 |
| prop_over65 =0.124-0.192 (p21-78) &med_area_home <19.126 (p61)                       | rate_local12 =0.005-0.099 (p45-78) | 43.51 | 0.63 | 20.89 | 0.17 | 1.948E-07 |
| <b>193</b> &POI_den_edu <672.277 (p81)                                               | rate_local12 =0.005-0.099 (p45-78) | 43.51 | 0.63 | 20.89 | 0.17 | 1.948E-07 |
| <b>194</b> gender_ratio =86.303-98.194 (p10-78) &den_public_trans >16.696 (p50)      | rate_local12 =0.006-0.115 (p45-81) | 52.16 | 0.59 | 20.83 | 0.07 | 4.562E-05 |
| <b>195</b> gender_ratio =86.007-98.493 (p10-78) &med_income <18326.955 (p61)         | rate_local12 =0.005-0.098 (p45-78) | 40.91 | 0.66 | 20.83 | 0.15 | 2.241E-05 |
| prop_over65 =0.118-0.179 (p17-68) &gender_ratio =86.802-97.562 (p11-76)              | rate_local12 =0.005-0.098 (p45-78) | 40.91 | 0.66 | 20.83 | 0.15 | 2.241E-05 |
| <b>196</b> &build_area_pp <61.402 (p50)                                              |                                    |       |      |       |      |           |
| <b>197</b> med_income <19446.921 (p63) &prop_open_recreation =0.013-0.128 (p33-85)   |                                    |       |      |       |      |           |
| <b>198</b> den_public_trans >18.486 (p53) &POI_den_mall_mkt <330.394 (p79)           |                                    |       |      |       |      |           |
| prop_household_3gen =0.017-0.065 (p15-87) &den_road >5.711 (p27)                     |                                    |       |      |       |      |           |
| <b>199</b> &POI_den_sports <954.460 (p81)                                            |                                    |       |      |       |      |           |
| build_area_pp <98.252 (p66) &prop_grassland <0.042 (p60) &POI_den_mall_mkt           |                                    |       |      |       |      |           |
| <b>200</b> <373.003 (p81)                                                            |                                    |       |      |       |      |           |

|            |                                                                                                            |                                    |       |      |       |      |           |
|------------|------------------------------------------------------------------------------------------------------------|------------------------------------|-------|------|-------|------|-----------|
| <b>201</b> | prop_over65 =0.120-0.183 (p19-72) &prop_preprim_edu >0.080 (p19) &den_road >5.249 (p25)                    | rate_local12 =0.005-0.134 (p45-84) | 46.48 | 0.70 | 20.82 | 0.11 | 6.66E-07  |
| <b>202</b> | build_area_pp <98.252 (p66) &prop_grassland <0.042 (p60) &POI_den_edu <675.056 (p82)                       | rate_local12 =0.005-0.098 (p45-78) | 40.92 | 0.66 | 20.78 | 0.15 | 2.241E-05 |
| <b>203</b> | prop_higher_edu <0.319 (p79) &prop_transport >0.079 (p36)                                                  | rate_local12 =0.005-0.122 (p45-82) | 57.62 | 0.58 | 20.78 | 0.09 | 4.833E-05 |
| <b>204</b> | gender_ratio <95.051 (p64) &prop_preprim_edu =0.079-0.130 (p18-83) &POI_den_telecom_elec <657.018 (p82)    | rate_local12 =0.004-0.090 (p45-77) | 46.14 | 0.56 | 20.76 | 0.07 | 7.37E-05  |
| <b>205</b> | med_area_home <20.056 (p67) &den_road >5.901 (p28)                                                         | rate_local12 =0.006-0.114 (p45-81) | 60.70 | 0.54 | 20.74 | 0.06 | 4.799E-05 |
| <b>206</b> | prop_business <0.059 (p87) &prop_open_recreation =0.018-0.141 (p36-88)                                     | rate_local12 =0.005-0.116 (p45-81) | 52.18 | 0.59 | 20.70 | 0.08 | 5.102E-05 |
| <b>207</b> | den_public_trans >19.385 (p54) &POI_den_edu <645.069 (p81)                                                 | rate_local12 =0.005-0.099 (p45-78) | 43.91 | 0.62 | 20.69 | 0.16 | 1.551E-07 |
| <b>208</b> | prop_business <0.063 (p87) &prop_transport >0.076 (p36)                                                    | rate_local12 =0.006-0.109 (p45-81) | 58.13 | 0.54 | 20.64 | 0.08 | 3.5E-05   |
| <b>209</b> | den_public_trans >19.022 (p53) &POI_den_transport <1450.759 (p79)                                          | rate_local12 =0.005-0.096 (p45-77) | 42.28 | 0.63 | 20.59 | 0.17 | 1.324E-08 |
| <b>210</b> | med_income <19466.460 (p63) &prop_open_recreation =0.013-0.128 (p33-85) &POI_den_transport <1281.420 (p77) | rate_local12 =0.005-0.103 (p45-79) | 38.69 | 0.71 | 20.51 | 0.11 | 2.809E-05 |
| <b>211</b> | prop_transport >0.091 (p39) &LU_entropy >0.559 (p50)                                                       | rate_local12 =0.005-0.102 (p45-79) | 42.57 | 0.64 | 20.47 | 0.16 | 1.503E-05 |
| <b>212</b> | build_area_pp <99.427 (p67) &prop_grassland <0.042 (p60) &POI_den_sports <972.367 (p81)                    | rate_local12 =0.005-0.098 (p45-78) | 40.04 | 0.67 | 20.41 | 0.15 | 5.946E-05 |
| <b>213</b> | prop_over65 =0.118-0.179 (p17-68) &gender_ratio =86.802-97.562 (p11-76) &prop_open_recreation >0.029 (p48) | rate_local12 =0.005-0.090 (p45-77) | 34.64 | 0.75 | 20.36 | 0.15 | 3.468E-05 |
| <b>214</b> | prop_gov_insti_faci =0.025-0.143 (p36-91) &POI_den_telecom_elec <175.141 (p59)                             | rate_local12 =0.005-0.101 (p45-78) | 38.29 | 0.71 | 20.34 | 0.21 | 3.289E-05 |
| <b>215</b> | den_road >7.114 (p34) &POI_den_mall_mkt <327.350 (p79)                                                     | rate_local12 =0.005-0.096 (p45-77) | 51.69 | 0.53 | 20.31 | 0.12 | 6.109E-06 |
| <b>216</b> | prop_over65 =0.122-0.177 (p20-66) &med_area_home <17.425 (p52) &LU_entropy >0.553 (p49)                    | rate_local12 =0.006-0.081 (p45-75) | 30.66 | 0.87 | 20.30 | 0.21 | 5.077E-06 |
| <b>217</b> | build_area_pp <66.740 (p52)                                                                                | rate_local12 =0.005-0.113 (p45-81) | 58.45 | 0.54 | 20.29 | 0.19 | 4.019E-09 |
| <b>218</b> | den_road >7.114 (p34) &POI_den_transport <1528.257 (p80)                                                   | rate_local12 =0.005-0.090 (p45-77) | 51.27 | 0.51 | 20.28 | 0.11 | 9.674E-07 |
| <b>219</b> | prop_gov_insti_faci =0.025-0.143 (p36-91)                                                                  | rate_local12 =0.004-0.131 (p45-83) | 64.44 | 0.56 | 20.20 | 0.18 | 8.888E-09 |
| <b>220</b> | gender_ratio <95.235 (p65) &prop_open_recreation >0.033 (p50) &POI_den_mall_mkt <349.960 (p81)             | rate_local12 =0.005-0.087 (p45-76) | 38.27 | 0.65 | 20.20 | 0.10 | 7.101E-05 |
| <b>221</b> | prop_publicResid >0.050 (p71)                                                                              | rate_local12 =0.005-0.112 (p45-81) | 41.65 | 0.68 | 20.17 | 0.33 | 1.466E-11 |
| <b>222</b> | prop_open_recreation =0.020-0.135 (p39-87) &LU_entropy >0.551 (p49)                                        | rate_local12 =0.005-0.103 (p45-79) | 40.35 | 0.67 | 20.03 | 0.16 | 1.26E-06  |
| <b>223</b> | prop_preprim_edu >0.077 (p16) &prop_transport >0.091 (p39)                                                 | rate_local12 =0.005-0.114 (p45-81) | 56.53 | 0.55 | 19.88 | 0.07 | 5.036E-05 |
| <b>224</b> | den_road >7.757 (p37) &POI_den_edu <628.086 (p81)                                                          | rate_local12 =0.005-0.096 (p45-77) | 50.49 | 0.53 | 19.87 | 0.11 | 1.454E-06 |
| <b>225</b> | den_road >6.004 (p29) &LU_entropy >0.548 (p47)                                                             | rate_local12 =0.005-0.097 (p45-77) | 47.81 | 0.55 | 19.82 | 0.09 | 1.002E-05 |

|     |                                                                                                              |                                    |       |      |       |      |           |
|-----|--------------------------------------------------------------------------------------------------------------|------------------------------------|-------|------|-------|------|-----------|
| 226 | prop_open_recreation >0.027 (p46) &POI_den_telecom_elec <539.258 (p78)                                       | rate_local12 =0.005-0.090 (p45-77) | 46.21 | 0.54 | 19.75 | 0.11 | 1.374E-05 |
| 227 | prop_over65 =0.118-0.179 (p17-68) &build_area_pp <95.055 (p64) &LU_entropy >0.536 (p43)                      | rate_local12 =0.005-0.091 (p45-77) | 33.09 | 0.78 | 19.74 | 0.18 | 2.336E-05 |
| 228 | prop_over65 =0.120-0.197 (p19-80) &prop_open_recreation >0.025 (p45)                                         | rate_local12 =0.006-0.156 (p45-88) | 53.20 | 0.66 | 19.66 | 0.12 | 2.306E-05 |
| 229 | den_population >15589.742 (p47)                                                                              | rate_local12 =0.005-0.131 (p45-83) | 63.59 | 0.55 | 19.66 | 0.17 | 2.319E-10 |
| 230 | prop_higher_edu <0.296 (p75) &prop_gov_insti_faci >0.029 (p40)                                               | rate_local12 =0.006-0.120 (p45-82) | 52.81 | 0.58 | 19.56 | 0.10 | 8.002E-05 |
| 231 | prop_open_recreation >0.029 (p47) &POI_den_mall_mkt <280.812 (p78)                                           | rate_local12 =0.005-0.090 (p45-77) | 44.28 | 0.56 | 19.55 | 0.12 | 1.015E-05 |
| 232 | med_income <18450.148 (p61) &den_road >5.958 (p28)                                                           | rate_local12 =0.005-0.117 (p45-82) | 54.35 | 0.56 | 19.53 | 0.10 | 7.866E-05 |
| 233 | prop_open_recreation >0.029 (p47) &POI_den_sports <785.405 (p78)                                             | rate_local12 =0.006-0.092 (p45-77) | 44.31 | 0.56 | 19.37 | 0.12 | 1.015E-05 |
| 234 | den_bldg =0.071-0.351 (p25-79) &build_area_pp <91.239 (p62)                                                  | rate_local12 =0.005-0.095 (p45-77) | 43.38 | 0.57 | 19.03 | 0.12 | 6.882E-05 |
| 235 | prop_transport >0.103 (p43) &POI_den_transport <543.613 (p65)                                                | rate_local12 =0.005-0.091 (p45-77) | 34.42 | 0.70 | 18.97 | 0.27 | 1.406E-07 |
| 236 | gender_ratio <94.290 (p58) &prop_open_recreation >0.035 (p52) &POI_den_transport <1626.628 (p81)             | rate_local12 =0.005-0.095 (p45-77) | 36.78 | 0.66 | 18.97 | 0.12 | 2.563E-05 |
| 237 | prop_preprim_edu >0.078 (p17) &den_public_trans >17.390 (p52)                                                | rate_local12 =0.005-0.118 (p45-82) | 50.96 | 0.57 | 18.88 | 0.08 | 7.494E-06 |
| 238 | prop_transport >0.104 (p44) &POI_den_sports <351.464 (p64)                                                   | rate_local12 =0.005-0.092 (p45-77) | 33.62 | 0.71 | 18.82 | 0.28 | 4.268E-09 |
| 239 | den_road >6.555 (p30) &prop_business <0.065 (p87)                                                            | rate_local12 =0.004-0.116 (p45-81) | 61.71 | 0.51 | 18.62 | 0.06 | 6.877E-05 |
| 240 | den_road >5.303 (p26) &prop_open_recreation =0.013-0.127 (p33-84) &POI_den_telecom_elec <170.060 (p59)       | rate_local12 =0.006-0.099 (p45-78) | 33.18 | 0.74 | 18.56 | 0.14 | 2.866E-05 |
| 241 | prop_transport >0.106 (p44) &POI_den_mall_mkt <115.474 (p64)                                                 | rate_local12 =0.004-0.088 (p45-76) | 32.86 | 0.70 | 18.50 | 0.28 | 1.568E-09 |
| 242 | prop_preprim_edu =0.080-0.125 (p19-81)                                                                       | rate_local12 =0.005-0.114 (p45-81) | 65.28 | 0.49 | 18.35 | 0.14 | 1.929E-08 |
| 243 | den_public_trans >19.855 (p54) &LU_entropy >0.556 (p50)                                                      | rate_local12 =0.005-0.104 (p45-80) | 35.23 | 0.70 | 18.30 | 0.21 | 4.693E-06 |
| 244 | prop_household_3gen =0.017-0.065 (p15-87) &den_road >5.711 (p27)                                             | rate_local12 =0.006-0.124 (p45-82) | 60.91 | 0.53 | 18.22 | 0.08 | 6.733E-05 |
| 245 | prop_over65 =0.128-0.180 (p24-70) &med_area_home <17.547 (p53) &den_bldg =0.071-0.351 (p25-79)               | rate_local12 =0.006-0.082 (p45-75) | 27.47 | 0.87 | 18.19 | 0.23 | 4.268E-05 |
| 246 | prop_over65 =0.142-0.212 (p36-89) &den_road >5.958 (p28) &POI_den_mall_mkt <439.465 (p85)                    | rate_local12 =0.005-0.107 (p45-81) | 40.41 | 0.62 | 18.13 | 0.11 | 5.96E-05  |
| 247 | den_public_trans >24.563 (p58) &prop_business <0.065 (p87)                                                   | rate_local12 =0.004-0.116 (p45-81) | 41.88 | 0.63 | 18.09 | 0.12 | 3.298E-06 |
| 248 | prop_over65 =0.142-0.212 (p36-89) &den_road >5.958 (p28) &POI_den_transport <2239.160 (p90)                  | rate_local12 =0.005-0.122 (p45-82) | 43.52 | 0.63 | 18.06 | 0.09 | 5.765E-05 |
| 249 | prop_open_recreation =0.013-0.127 (p33-84) &prop_transport >0.073 (p36) &POI_den_telecom_elec <239.361 (p65) | rate_local12 =0.004-0.104 (p45-80) | 32.12 | 0.76 | 17.95 | 0.14 | 5.223E-05 |
| 250 | prop_transport >0.110 (p47) &POI_den_telecom_elec <175.141 (p59)                                             | rate_local12 =0.004-0.091 (p45-77) | 29.71 | 0.79 | 17.94 | 0.36 | 6.562E-10 |
| 251 | gender_ratio =87.053-98.128 (p11-78)                                                                         | rate_local12 =0.005-0.108 (p45-81) | 66.61 | 0.47 | 17.92 | 0.13 | 1.976E-08 |
| 252 | med_income <21881.055 (p75) &POI_den_transport =149.484-1813.275 (p40-84)                                    | rate_local12 =0.005-0.108 (p45-81) | 41.11 | 0.61 | 17.91 | 0.12 | 8.321E-05 |

|     |                                                                             |                                    |       |      |       |      |           |
|-----|-----------------------------------------------------------------------------|------------------------------------|-------|------|-------|------|-----------|
| 253 | prop_open_recreation =0.022-0.138 (p39-87)                                  | rate_local12 =0.005-0.128 (p45-83) | 55.07 | 0.56 | 17.90 | 0.18 | 3.556E-09 |
| 254 | den_bldg >0.114 (p37) &POI_den_telecom_elec <523.327 (p78)                  | rate_local12 =0.005-0.093 (p45-77) | 46.40 | 0.52 | 17.90 | 0.12 | 2.383E-05 |
| 255 | den_road >7.783 (p37) &POI_den_telecom_elec <175.141 (p59)                  | rate_local12 =0.005-0.093 (p45-77) | 34.19 | 0.66 | 17.87 | 0.25 | 2.222E-07 |
|     | build_area_pp <95.886 (p65) &prop_shrubland <0.068 (p50)                    |                                    |       |      |       |      |           |
| 256 | &POI_den_mall_mkt <349.458 (p81)                                            | rate_local12 =0.005-0.094 (p45-77) | 32.35 | 0.71 | 17.82 | 0.19 | 4.285E-05 |
|     | build_area_pp <95.886 (p65) &prop_shrubland <0.068 (p50) &POI_den_transport |                                    |       |      |       |      |           |
| 257 | <1578.798 (p81)                                                             | rate_local12 =0.005-0.098 (p45-78) | 32.76 | 0.71 | 17.73 | 0.19 | 4.285E-05 |
| 258 | gender_ratio <95.235 (p65) &POI_den_sports <995.228 (p81)                   | rate_local12 =0.005-0.095 (p45-77) | 53.33 | 0.48 | 17.65 | 0.07 | 3.397E-06 |
| 259 | gender_ratio <94.290 (p58) &POI_den_transport <1626.628 (p81)               | rate_local12 =0.005-0.095 (p45-77) | 50.33 | 0.49 | 17.63 | 0.08 | 1.295E-05 |
| 260 | gender_ratio <94.290 (p58) &POI_den_mall_mkt <345.003 (p81)                 | rate_local12 =0.005-0.095 (p45-77) | 49.72 | 0.50 | 17.59 | 0.08 | 7.435E-06 |
| 261 | den_bldg >0.124 (p39) &POI_den_mall_mkt <301.168 (p78)                      | rate_local12 =0.005-0.090 (p45-77) | 43.82 | 0.52 | 17.48 | 0.13 | 3.233E-05 |
| 262 | prop_higher_edu <0.308 (p76) &den_bldg >0.117 (p38)                         | rate_local12 =0.005-0.118 (p45-82) | 52.61 | 0.54 | 17.47 | 0.10 | 3.215E-05 |
| 263 | den_bldg >0.123 (p39) &POI_den_edu <645.069 (p81)                           | rate_local12 =0.005-0.095 (p45-77) | 46.89 | 0.51 | 17.47 | 0.11 | 3.757E-05 |
| 264 | den_bldg >0.124 (p39) &POI_den_transport <1281.420 (p77)                    | rate_local12 =0.005-0.087 (p45-76) | 42.96 | 0.51 | 17.47 | 0.13 | 3.807E-05 |
| 265 | gender_ratio <94.372 (p59) &POI_den_telecom_elec <632.455 (p82)             | rate_local12 =0.005-0.099 (p45-78) | 51.19 | 0.50 | 17.41 | 0.08 | 7.422E-05 |
| 266 | prop_over65 =0.127-0.178 (p23-67) &LU_entropy >0.557 (p50)                  | rate_local12 =0.005-0.095 (p45-77) | 31.94 | 0.70 | 17.33 | 0.23 | 6.65E-06  |
| 267 | den_road >8.230 (p39) &POI_den_sports <342.772 (p64)                        | rate_local12 =0.005-0.088 (p45-76) | 34.13 | 0.62 | 17.25 | 0.22 | 5.588E-07 |
|     | med_area_home <19.900 (p65) &prop_grassland <0.046 (p61) &POI_den_sports    |                                    |       |      |       |      |           |
| 268 | <362.105 (p64)                                                              | rate_local12 =0.004-0.096 (p45-77) | 29.97 | 0.76 | 17.23 | 0.17 | 3.615E-05 |
| 269 | den_road =7.251-22.038 (p34-86)                                             | rate_local12 =0.005-0.103 (p45-79) | 53.18 | 0.49 | 17.19 | 0.16 | 8.734E-07 |
|     |                                                                             |                                    |       |      |       |      |           |
| 270 | den_bldg =0.094-0.328 (p31-76) &prop_open_recreation =0.017-0.131 (p36-86)  | rate_local12 =0.005-0.097 (p45-77) | 34.28 | 0.64 | 17.08 | 0.17 | 4.294E-05 |
| 271 | den_public_trans >19.385 (p54) &POI_den_sports <336.087 (p63)               | rate_local12 =0.005-0.099 (p45-78) | 29.68 | 0.76 | 16.91 | 0.30 | 6.272E-07 |
| 272 | den_bldg >0.100 (p33) &prop_business <0.064 (p87)                           | rate_local12 =0.005-0.110 (p45-81) | 57.23 | 0.49 | 16.56 | 0.06 | 8.087E-05 |
| 273 | prop_transport =0.088-0.336 (p39-88)                                        | rate_local12 =0.005-0.091 (p45-77) | 48.74 | 0.47 | 16.38 | 0.16 | 9.057E-08 |
|     | prop_preprim_edu >0.076 (p16) &den_public_trans >19.183 (p54)               |                                    |       |      |       |      |           |
| 274 | &POI_den_sports <315.206 (p62)                                              | rate_local12 =0.005-0.106 (p45-81) | 28.42 | 0.80 | 16.36 | 0.04 | 1.251E-05 |
| 275 | den_public_trans >20.275 (p55) &POI_den_telecom_elec <175.141 (p59)         | rate_local12 =0.005-0.094 (p45-77) | 26.48 | 0.83 | 16.27 | 0.38 | 1.05E-08  |
| 276 | prop_grassland <0.042 (p60) &POI_den_edu <675.056 (p82)                     | rate_local12 =0.005-0.098 (p45-78) | 45.33 | 0.51 | 16.14 | 0.11 | 3.567E-05 |
| 277 | prop_grassland <0.040 (p59) &POI_den_telecom_elec <175.141 (p59)            | rate_local12 =0.005-0.091 (p45-77) | 29.86 | 0.66 | 15.73 | 0.28 | 2.02E-07  |
| 278 | LU_entropy >0.543 (p46)                                                     | rate_local12 =0.005-0.103 (p45-79) | 54.68 | 0.47 | 15.70 | 0.13 | 1.235E-06 |
| 279 | den_bldg >0.124 (p39) &POI_den_sports <342.772 (p64)                        | rate_local12 =0.006-0.085 (p45-76) | 32.23 | 0.59 | 15.70 | 0.21 | 6.974E-06 |
|     | den_bldg =0.080-0.296 (p27-73) &prop_rural_set <0.063 (p78)                 |                                    |       |      |       |      |           |
| 280 | &POI_den_telecom_elec <270.226 (p67)                                        | rate_local12 =0.005-0.106 (p45-80) | 30.48 | 0.69 | 15.60 | 0.15 | 1.579E-05 |
|     | den_public_trans >35.072 (p68) &prop_business <0.076 (p89) &POI_den_sports  |                                    |       |      |       |      |           |
| 281 | <1375.127 (p87)                                                             | rate_local12 =0.003-0.110 (p45-81) | 29.16 | 0.73 | 15.20 | 0.10 | 5.496E-05 |

|                                                                                                                                                       |                                    |       |      |       |      |           |
|-------------------------------------------------------------------------------------------------------------------------------------------------------|------------------------------------|-------|------|-------|------|-----------|
| <b>282</b> prop_shrubland <0.089 (p55) &POI_den_mall_mkt <355.591 (p81)                                                                               | rate_local12 =0.004-0.084 (p45-75) | 37.91 | 0.50 | 15.14 | 0.13 | 2.641E-05 |
| <b>283</b> prop_over65 =0.134-0.178 (p29-67)                                                                                                          | rate_local12 =0.004-0.150 (p45-87) | 48.30 | 0.60 | 15.10 | 0.19 | 5.755E-06 |
| <b>284</b> prop_grassland <0.042 (p60) &POI_den_mall_mkt <150.646 (p67)<br>prop_over65 =0.131-0.195 (p28-80) &den_public_trans >26.846 (p59)          | rate_local12 =0.004-0.095 (p45-77) | 33.94 | 0.58 | 15.02 | 0.18 | 1.638E-05 |
| <b>285</b> &prop_business <0.065 (p87)                                                                                                                | rate_local12 =0.005-0.117 (p45-82) | 28.72 | 0.75 | 14.94 | 0.14 | 3.741E-05 |
| <b>286</b> prop_shrubland <0.089 (p55) &POI_den_transport <1458.002 (p79)                                                                             | rate_local12 =0.006-0.093 (p45-77) | 38.04 | 0.52 | 14.90 | 0.14 | 3.555E-05 |
| <b>287</b> den_public_trans >16.696 (p50)<br>den_public_trans >35.072 (p68) &prop_gov_insti_faci =0.013-0.147 (p29-91)                                | rate_local12 =0.005-0.126 (p45-82) | 57.19 | 0.51 | 14.80 | 0.13 | 7.127E-07 |
| <b>288</b> &POI_den_sports <1375.127 (p87)                                                                                                            | rate_local12 =0.004-0.135 (p45-85) | 31.07 | 0.74 | 14.69 | 0.07 | 4.98E-05  |
| <b>289</b> den_bldg =0.094-0.328 (p31-76)                                                                                                             | rate_local12 =0.005-0.071 (p45-73) | 40.63 | 0.43 | 14.67 | 0.16 | 5.131E-06 |
| <b>290</b> prop_grassland <0.042 (p60) &POI_den_transport <434.482 (p59)<br>den_public_trans >35.072 (p68) &prop_gov_insti_faci =0.013-0.147 (p29-91) | rate_local12 =0.005-0.082 (p45-75) | 28.00 | 0.62 | 14.59 | 0.26 | 4.821E-06 |
| <b>291</b> &POI_den_telecom_elec <946.930 (p91)                                                                                                       | rate_local12 =0.004-0.135 (p45-85) | 31.40 | 0.73 | 14.51 | 0.08 | 2.548E-05 |
| <b>292</b> den_bldg <0.281 (p70) &prop_transport >0.103 (p44)                                                                                         | rate_local12 =0.005-0.072 (p45-73) | 29.92 | 0.53 | 14.46 | 0.15 | 6.393E-05 |
| <b>293</b> prop_grassland <0.042 (p60) &POI_den_sports <279.052 (p60)                                                                                 | rate_local12 =0.004-0.093 (p45-77) | 28.67 | 0.62 | 14.10 | 0.24 | 1.583E-05 |
| <b>294</b> POI_den_mall_mkt =31.091-261.421 (p42-77)<br>prop_over65 =0.132-0.195 (p28-80) &den_public_trans >33.002 (p67)                             | rate_local12 =0.005-0.103 (p45-79) | 37.55 | 0.52 | 13.46 | 0.19 | 1.277E-06 |
| <b>295</b> &POI_den_sports <764.402 (p78)                                                                                                             | rate_local12 =0.005-0.123 (p45-82) | 21.65 | 0.86 | 12.27 | 0.13 | 3.534E-05 |
| <b>296</b> prop_household_3gen =0.023-0.062 (p19-86)                                                                                                  | rate_local12 =0.004-0.102 (p45-78) | 58.15 | 0.42 | 12.13 | 0.09 | 1.588E-05 |
| <b>297</b> den_road <14.354 (p64) &prop_transport >0.111 (p48)                                                                                        | rate_local12 =0.006-0.097 (p45-77) | 24.28 | 0.63 | 11.85 | 0.19 | 5.325E-05 |
| <b>298</b> prop_private_resid >0.044 (p48) &POI_den_sports <283.563 (p60)                                                                             | rate_local12 =0.005-0.086 (p45-76) | 25.71 | 0.56 | 11.85 | 0.19 | 1.275E-05 |
| <b>299</b> med_income <19063.503 (p63)                                                                                                                | rate_local12 =0.007-0.133 (p45-84) | 63.97 | 0.47 | 11.72 | 0.09 | 4.749E-05 |
| <b>300</b> prop_shrubland <0.068 (p50) &POI_den_telecom_elec <173.241 (p59)                                                                           | rate_local12 =0.005-0.083 (p45-75) | 21.66 | 0.63 | 11.45 | 0.28 | 1.08E-05  |
| <b>301</b> prop_higher_edu <0.245 (p64)                                                                                                               | rate_local12 =0.007-0.036 (p45-59) | 26.42 | 0.20 | 8.61  | 0.06 | 7.147E-05 |
| <b>302</b> prop_private_resid =0.043-0.162 (p48-78)                                                                                                   | rate_local12 =0.004-0.062 (p45-71) | 23.72 | 0.37 | 8.56  | 0.13 | 7.922E-05 |
| <b>303</b> prop_shrubland <0.020 (p36) &POI_den_sports <204.087 (p55)                                                                                 | rate_local12 =0.003-0.078 (p45-74) | 8.61  | 0.76 | 5.35  | 0.45 | 6.349E-05 |
| <b>304</b> prop_rural_set >0.051 (p75) &prop_gov_insti_faci >0.086 (p73)                                                                              | rate_local12 =0.006-0.033 (p45-58) | 3.52  | 0.73 | 2.91  | 0.53 | 7.621E-05 |
| <b>305</b> prop_private_resid <0.098 (p66) &prop_publicResid <0.017 (p63)                                                                             | rate_local12 <0.004 (p45)          | 57.79 | 0.71 | 20.80 | 0.15 | 1.543E-05 |
| <b>306</b> prop_gov_insti_faci <0.025 (p36)                                                                                                           | rate_local12 <0.004 (p45)          | 54.86 | 0.71 | 19.79 | 0.26 | 2.083E-08 |
| <b>307</b> prop_publicResid <0.001 (p48)                                                                                                              | rate_local12 <0.005 (p45)          | 65.00 | 0.63 | 18.28 | 0.18 | 4.83E-07  |
| <b>308</b> prop_open_recreation <0.017 (p36)                                                                                                          | rate_local12 <0.005 (p45)          | 52.91 | 0.69 | 18.17 | 0.24 | 1.02E-07  |
| <b>309</b> den_population <15589.742 (p47)                                                                                                            | rate_local12 <0.005 (p45)          | 63.62 | 0.63 | 18.06 | 0.18 | 1.272E-08 |
| <b>310</b> prop_preprim_edu >0.098 (p54) &prop_publicResid <0.011 (p61)                                                                               | rate_local12 <0.005 (p45)          | 42.75 | 0.72 | 15.82 | 0.16 | 4.813E-05 |
| <b>311</b> prop_private_resid <0.009 (p26)                                                                                                            | rate_local12 <0.004 (p45)          | 41.31 | 0.73 | 15.77 | 0.28 | 2.089E-07 |
| <b>312</b> den_public_trans <16.696 (p50)                                                                                                             | rate_local12 <0.005 (p45)          | 61.80 | 0.60 | 15.23 | 0.15 | 5.857E-06 |
| <b>313</b> prop_transport <0.088 (p39)                                                                                                                | rate_local12 <0.005 (p45)          | 53.39 | 0.63 | 14.86 | 0.17 | 5.076E-05 |

|                                                                           |                           |       |      |       |      |           |
|---------------------------------------------------------------------------|---------------------------|-------|------|-------|------|-----------|
| <b>314</b> prop_preprim_edu >0.104 (p62) &prop_private_resid <0.017 (p33) | rate_local12 <0.004 (p45) | 33.52 | 0.77 | 13.73 | 0.11 | 5.207E-05 |
| <b>315</b> den_road <7.251 (p34)                                          | rate_local12 <0.005 (p45) | 46.67 | 0.64 | 13.43 | 0.18 | 5.593E-05 |
| <b>316</b> med_area_home >15.950 (p47)                                    | rate_local12 <0.005 (p45) | 66.61 | 0.57 | 13.35 | 0.11 | 4.79E-05  |
| <b>317</b> prop_business <0.000 (p23)                                     | rate_local12 <0.002 (p45) | 35.94 | 0.71 | 12.97 | 0.26 | 1.506E-05 |
| <b>318</b> prop_utilities <0.001 (p20)                                    | rate_local12 <0.004 (p45) | 31.85 | 0.76 | 12.79 | 0.30 | 7.404E-06 |
| <b>319</b> den_bldg <0.055 (p20)                                          | rate_local12 <0.005 (p45) | 31.06 | 0.73 | 11.86 | 0.28 | 3.534E-05 |
| <b>320</b> prop_over65 >0.198 (p82)                                       | rate_local12 <0.004 (p45) | 29.43 | 0.74 | 11.38 | 0.29 | 5.639E-05 |
| <b>321</b> prop_grassland >0.135 (p81)                                    | rate_local12 <0.003 (p45) | 28.59 | 0.72 | 10.48 | 0.26 | 6.798E-05 |
| <b>322</b> prop_household_3gen >0.062 (p86)                               | rate_local12 <0.004 (p45) | 23.16 | 0.77 | 9.49  | 0.31 | 7.69E-05  |



(g) Rules for wave-1 imported case rate; POI density was used

| No. | Antecedent                                                                                  | Consequent                   | Supp  | Conf | Lev   | Imp  | P         |
|-----|---------------------------------------------------------------------------------------------|------------------------------|-------|------|-------|------|-----------|
| 1   | prop_higher_edu >0.209 (p53) &prop_industrial <0.010 (p71)                                  | rate_imported12 >0.087 (p67) | 54.47 | 0.66 | 25.02 | 0.07 | 4.865E-05 |
| 2   | prop_higher_edu >0.213 (p54) &build_area_pp >62.720 (p50)                                   | rate_imported12 >0.122 (p71) | 42.50 | 0.67 | 24.21 | 0.14 | 7.081E-05 |
| 3   | prop_higher_edu >0.193 (p47) &med_area_home >17.271 (p52)                                   | rate_imported12 >0.111 (p71) | 45.05 | 0.62 | 22.89 | 0.13 | 1.799E-05 |
| 4   | prop_preprim_edu <0.117 (p78) &build_area_pp >60.189 (p50)<br>&prop_industrial <0.011 (p73) | rate_imported12 >0.094 (p68) | 45.31 | 0.68 | 22.75 | 0.10 | 6.715E-05 |
| 5   | prop_preprim_edu <0.135 (p84) &med_area_home >16.429 (p49)                                  | rate_imported12 >0.081 (p65) | 54.56 | 0.60 | 21.10 | 0.08 | 6.929E-05 |
| 6   | med_income >16651.172 (p51) &build_area_pp >69.910 (p53)<br>&prop_agricultural <0.068 (p83) | rate_imported12 >0.084 (p66) | 40.24 | 0.75 | 20.65 | 0.11 | 7.63E-05  |
| 7   | prop_preprim_edu <0.099 (p55) &prop_publicResid <0.014 (p62)                                | rate_imported12 >0.101 (p68) | 44.59 | 0.60 | 20.57 | 0.15 | 1.505E-05 |
| 8   | build_area_pp >60.696 (p50) &prop_industrial <0.006 (p64)                                   | rate_imported12 >0.098 (p68) | 44.52 | 0.61 | 20.17 | 0.15 | 3.171E-06 |
| 9   | med_area_home >17.271 (p52) &prop_rural_set <0.050 (p75)                                    | rate_imported12 >0.111 (p71) | 40.51 | 0.60 | 19.92 | 0.12 | 6.752E-05 |
| 10  | med_income >17090.451 (p53) &prop_industrial <0.000 (p44)                                   | rate_imported12 >0.100 (p68) | 37.37 | 0.70 | 19.91 | 0.18 | 1.157E-05 |
| 11  | build_area_pp >63.743 (p51) &prop_rural_set <0.010 (p58) &prop_industrial<br><0.017 (p79)   | rate_imported12 >0.117 (p71) | 34.19 | 0.70 | 19.73 | 0.10 | 2.362E-05 |
| 12  | prop_preprim_edu <0.135 (p84) &build_area_pp >67.205 (p52)                                  | rate_imported12 >0.122 (p71) | 43.72 | 0.52 | 19.69 | 0.09 | 4.473E-05 |
| 13  | build_area_pp >69.910 (p53) &prop_agricultural <0.068 (p83)                                 | rate_imported12 >0.084 (p66) | 46.58 | 0.63 | 19.66 | 0.13 | 5.865E-07 |
| 14  | prop_publicResid <0.010 (p60) &prop_industrial <0.010 (p71)                                 | rate_imported12 >0.100 (p68) | 50.71 | 0.53 | 19.56 | 0.10 | 2.048E-05 |
| 15  | med_area_home >16.755 (p50)                                                                 | rate_imported12 >0.115 (p71) | 50.99 | 0.47 | 18.58 | 0.17 | 9.407E-08 |
| 16  | build_area_pp >68.387 (p52) &prop_rural_set <0.024 (p65)                                    | rate_imported12 >0.094 (p68) | 39.59 | 0.62 | 18.07 | 0.15 | 7.401E-06 |
| 17  | prop_publicResid <0.035 (p69)                                                               | rate_imported12 >0.111 (p71) | 60.36 | 0.41 | 15.60 | 0.11 | 9.516E-08 |
| 18  | build_area_pp >64.307 (p51)                                                                 | rate_imported12 >0.119 (p71) | 47.49 | 0.43 | 15.47 | 0.14 | 1.109E-05 |
| 19  | den_public_trans =3.582-84.723 (p25-91) &build_area_pp >71.228 (p53)                        | rate_imported12 >0.084 (p66) | 34.30 | 0.65 | 15.23 | 0.16 | 6.249E-05 |
| 20  | prop_higher_edu =0.263-0.402 (p66-90)                                                       | rate_imported12 >0.101 (p68) | 30.69 | 0.61 | 14.21 | 0.28 | 1.212E-06 |
| 21  | build_area_pp >75.510 (p55) &prop_gov_insti_faci >0.025 (p36)                               | rate_imported12 >0.068 (p62) | 34.91 | 0.68 | 13.94 | 0.15 | 6.787E-06 |
| 22  | prop_industrial <0.000 (p44)                                                                | rate_imported12 >0.094 (p68) | 45.19 | 0.49 | 13.87 | 0.15 | 3.763E-06 |
| 23  | prop_preprim_edu <0.084 (p25)                                                               | rate_imported12 >0.114 (p71) | 29.21 | 0.55 | 13.16 | 0.25 | 1.013E-05 |
| 24  | LU_entropy <0.561 (p51)                                                                     | rate_imported12 >0.096 (p68) | 49.34 | 0.45 | 12.72 | 0.12 | 5.049E-05 |
| 25  | med_income =19043.072-37169.137 (p63-92)                                                    | rate_imported12 >0.109 (p70) | 31.37 | 0.51 | 12.44 | 0.20 | 6.84E-07  |
| 26  | ave_household_size >3.251 (p87)                                                             | rate_imported12 >0.109 (p70) | 20.28 | 0.76 | 11.96 | 0.45 | 6.175E-09 |
| 27  | prop_over65 <0.133 (p28)                                                                    | rate_imported12 >0.080 (p64) | 34.12 | 0.56 | 11.49 | 0.19 | 5.436E-05 |
| 28  | med_income >37169.137 (p92)                                                                 | rate_imported12 >0.109 (p70) | 16.02 | 0.92 | 10.66 | 0.61 | 4.383E-08 |
| 29  | den_population =845.965-18750.995 (p14-50)                                                  | rate_imported12 >0.082 (p65) | 38.62 | 0.51 | 10.58 | 0.14 | 6.303E-05 |
| 30  | prop_higher_edu >0.402 (p90)                                                                | rate_imported12 >0.101 (p68) | 16.66 | 0.83 | 10.13 | 0.51 | 3.384E-08 |

|    |                                                                                                       |                                       |       |      |       |      |           |
|----|-------------------------------------------------------------------------------------------------------|---------------------------------------|-------|------|-------|------|-----------|
| 31 | build_area_pp >69.988 (p53) &POI_den_telecom_elec >420.031 (p76)                                      | rate_imported12 >0.228 (p81)          | 14.05 | 0.54 | 9.17  | 0.23 | 3.174E-05 |
| 32 | den_population <7302.660 (p37) &prop_private_resid =0.022-0.228 (p36-85)                              | rate_imported12 >0.090 (p67)          | 16.83 | 0.73 | 8.81  | 0.32 | 3.955E-05 |
| 33 | den_population =8304.569-47145.016 (p39-74) &POI_den_telecom_elec >206.748 (p64)                      | rate_imported12 >0.094 (p68)          | 20.60 | 0.56 | 8.06  | 0.16 | 2.352E-05 |
| 34 | gender_ratio >103.674 (p89)                                                                           | rate_imported12 >0.205 (p80)          | 11.96 | 0.49 | 7.21  | 0.30 | 7.005E-05 |
| 35 | build_area_pp >67.949 (p52) &prop_private_resid >0.220 (p85)                                          | rate_imported12 >0.180 (p79)          | 10.17 | 0.74 | 7.19  | 0.38 | 2.466E-05 |
| 36 | den_bldg <0.058 (p21) &prop_private_resid =0.026-0.163 (p39-78)                                       | rate_imported12 >0.192 (p80)          | 7.05  | 0.96 | 5.52  | 0.64 | 3.457E-06 |
| 37 | build_area_pp <69.910 (p53) &prop_agricultural >0.068 (p83)                                           | rate_imported12 >0.084 (p66)          | 4.65  | 0.59 | 1.78  | 0.35 | 3.577E-05 |
| 38 | gender_ratio <96.153 (p71) &prop_preprim_edu <0.124 (p80) &med_area_home <17.388 (p52)                | rate_imported12 =0.003-0.123 (p36-71) | 58.18 | 0.71 | 28.90 | 0.07 | 7.727E-05 |
| 39 | prop_preprim_edu <0.130 (p82) &med_area_home <17.522 (p53) &POI_den_transport <1435.842 (p79)         | rate_imported12 =0.002-0.101 (p36-68) | 50.40 | 0.73 | 27.80 | 0.11 | 2.704E-05 |
| 40 | prop_preprim_edu <0.130 (p82) &med_area_home <17.522 (p53) &POI_den_mall_mkt <125.736 (p65)           | rate_imported12 =0.003-0.093 (p36-68) | 44.03 | 0.81 | 26.97 | 0.15 | 3.205E-07 |
| 41 | prop_preprim_edu <0.130 (p82) &med_area_home <17.522 (p53) &POI_den_sports <425.600 (p66)             | rate_imported12 =0.002-0.101 (p36-68) | 45.43 | 0.80 | 26.97 | 0.14 | 4.385E-07 |
| 42 | prop_preprim_edu <0.131 (p83) &med_area_home <17.376 (p52) &POI_den_telecom_elec <210.823 (p64)       | rate_imported12 =0.003-0.096 (p36-68) | 43.85 | 0.82 | 26.88 | 0.14 | 1.749E-07 |
| 43 | gender_ratio <95.332 (p66) &prop_preprim_edu <0.132 (p83) &med_income <20537.185 (p73)                | rate_imported12 =0.003-0.091 (p36-67) | 53.85 | 0.61 | 26.74 | 0.10 | 1.251E-05 |
| 44 | prop_preprim_edu <0.132 (p83) &med_income <20537.185 (p73) &build_area_pp <70.879 (p53)               | rate_imported12 =0.001-0.110 (p36-71) | 54.38 | 0.66 | 26.71 | 0.08 | 8.546E-06 |
| 45 | prop_preprim_edu <0.131 (p83) &med_income <20826.029 (p73) &den_public_trans =8.583-88.534 (p38-91)   | rate_imported12 =0.003-0.094 (p36-68) | 49.86 | 0.67 | 26.47 | 0.06 | 5.183E-05 |
| 46 | med_area_home <18.538 (p56) &den_public_trans =6.785-83.086 (p34-90)                                  | rate_imported12 =0.002-0.118 (p36-71) | 55.54 | 0.67 | 26.41 | 0.14 | 2.195E-05 |
| 47 | med_area_home <17.126 (p52) &build_area_pp <62.684 (p50)                                              | rate_imported12 =0.004-0.085 (p36-66) | 50.77 | 0.62 | 26.35 | 0.11 | 1.904E-05 |
| 48 | gender_ratio <94.297 (p58) &med_area_home <18.565 (p56)                                               | rate_imported12 =0.003-0.122 (p36-71) | 56.36 | 0.66 | 26.19 | 0.13 | 3.363E-05 |
| 49 | gender_ratio <96.137 (p71) &prop_preprim_edu <0.133 (p84) &prop_higher_edu <0.296 (p75)               | rate_imported12 =0.003-0.090 (p36-67) | 56.14 | 0.58 | 26.19 | 0.09 | 2.004E-05 |
| 50 | prop_preprim_edu <0.134 (p84) &prop_higher_edu <0.236 (p62) &prop_private_resid =0.010-0.219 (p27-84) | rate_imported12 =0.003-0.090 (p36-67) | 44.92 | 0.73 | 26.16 | 0.10 | 6.142E-07 |
| 51 | prop_preprim_edu <0.133 (p84) &prop_higher_edu <0.242 (p63) &prop_agricultural <0.049 (p80)           | rate_imported12 =0.003-0.079 (p36-64) | 48.83 | 0.61 | 26.16 | 0.10 | 1.749E-06 |

|    |                                                                                                          |                                       |       |      |       |      |           |
|----|----------------------------------------------------------------------------------------------------------|---------------------------------------|-------|------|-------|------|-----------|
| 52 | prop_preprim_edu <0.134 (p84) &med_income <18486.007 (p61) &prop_private_resid =0.010-0.219 (p27-84)     | rate_imported12 =0.003-0.088 (p36-67) | 45.68 | 0.70 | 25.96 | 0.09 | 4.844E-06 |
| 53 | prop_preprim_edu <0.124 (p80) &prop_higher_edu <0.249 (p64) &prop_transport >0.057 (p33)                 | rate_imported12 =0.003-0.086 (p36-66) | 47.95 | 0.65 | 25.86 | 0.10 | 6.649E-05 |
| 54 | prop_preprim_edu <0.135 (p84) &med_income <20537.185 (p73) &prop_agricultural <0.049 (p80)               | rate_imported12 =0.003-0.082 (p36-65) | 55.02 | 0.54 | 25.73 | 0.07 | 1.924E-05 |
| 55 | prop_preprim_edu <0.132 (p83) &prop_higher_edu <0.269 (p68) &med_area_home <20.396 (p68)                 | rate_imported12 =0.005-0.083 (p36-65) | 52.34 | 0.56 | 25.11 | 0.07 | 6.099E-05 |
| 56 | prop_preprim_edu <0.127 (p82) &med_income <19791.098 (p65) &POI_den_transport =40.112-1204.130 (p17-77)  | rate_imported12 =0.003-0.095 (p36-68) | 46.03 | 0.69 | 24.95 | 0.13 | 1.399E-05 |
| 57 | prop_preprim_edu <0.133 (p84) &prop_higher_edu <0.244 (p63) &build_area_pp <67.205 (p52)                 | rate_imported12 =0.002-0.087 (p36-67) | 46.14 | 0.65 | 24.86 | 0.08 | 6.917E-05 |
| 58 | med_income <18922.890 (p62) &den_public_trans =6.320-77.509 (p33-88)                                     | rate_imported12 =0.004-0.096 (p36-68) | 48.85 | 0.64 | 24.80 | 0.17 | 7.034E-08 |
| 59 | prop_preprim_edu <0.127 (p82) &med_area_home <16.639 (p50) &LU_entropy >0.566 (p52)                      | rate_imported12 =0.002-0.083 (p36-65) | 39.75 | 0.77 | 24.79 | 0.12 | 6.309E-06 |
| 60 | med_area_home <17.685 (p54) &den_public_trans =5.972-93.660 (p33-92) &POI_den_sports <406.305 (p65)      | rate_imported12 =0.003-0.090 (p36-67) | 41.04 | 0.77 | 24.67 | 0.13 | 6.354E-06 |
| 61 | prop_preprim_edu <0.129 (p82) &prop_higher_edu <0.240 (p63) &POI_den_transport =40.112-1204.130 (p17-77) | rate_imported12 =0.004-0.087 (p36-67) | 44.23 | 0.68 | 24.60 | 0.14 | 6.737E-05 |
| 62 | med_area_home <16.096 (p47) &prop_private_resid =0.010-0.219 (p27-84)                                    | rate_imported12 =0.003-0.068 (p36-62) | 42.13 | 0.60 | 24.36 | 0.12 | 3.107E-05 |
| 63 | med_income <19454.231 (p63) &prop_agricultural <0.051 (p80) &LU_entropy >0.546 (p47)                     | rate_imported12 =0.003-0.083 (p36-65) | 41.87 | 0.70 | 24.35 | 0.15 | 1.903E-06 |
| 64 | med_area_home <15.786 (p46) &POI_den_mall_mkt <106.828 (p63)                                             | rate_imported12 =0.004-0.083 (p36-65) | 40.78 | 0.72 | 24.29 | 0.19 | 7.457E-06 |
| 65 | prop_preprim_edu <0.126 (p81) &prop_higher_edu <0.241 (p63)                                              | rate_imported12 =0.001-0.115 (p36-71) | 57.26 | 0.60 | 24.21 | 0.16 | 4.375E-08 |
| 66 | prop_preprim_edu <0.128 (p82) &med_income <19189.057 (p63)                                               | rate_imported12 =0.004-0.107 (p36-70) | 59.05 | 0.57 | 24.21 | 0.12 | 6.278E-07 |
| 67 | med_area_home <18.572 (p56) &build_area_pp <60.400 (p50) &POI_den_mall_mkt <96.359 (p61)                 | rate_imported12 =0.003-0.084 (p36-66) | 38.31 | 0.80 | 24.18 | 0.18 | 2.488E-05 |
| 68 | med_area_home <18.617 (p56) &build_area_pp <62.684 (p50) &POI_den_sports <322.303 (p63)                  | rate_imported12 =0.004-0.085 (p36-66) | 38.94 | 0.78 | 24.17 | 0.17 | 7.825E-05 |
| 69 | med_income <19851.218 (p65) &den_public_trans =7.873-93.077 (p37-92) &POI_den_transport <580.508 (p65)   | rate_imported12 =0.004-0.089 (p36-67) | 40.01 | 0.77 | 24.15 | 0.12 | 5.517E-05 |
| 70 | prop_higher_edu <0.264 (p66) &prop_agricultural <0.054 (p81) &POI_den_transport =31.335-969.972 (p14-73) | rate_imported12 =0.003-0.081 (p36-64) | 43.19 | 0.65 | 24.08 | 0.15 | 1.288E-05 |

|           |                                                                                                           |                                       |       |      |       |      |           |
|-----------|-----------------------------------------------------------------------------------------------------------|---------------------------------------|-------|------|-------|------|-----------|
| <b>71</b> | med_area_home <18.116 (p55) &den_public_trans =6.106-93.761 (p33-92) &POI_den_mall_mkt <98.355 (p62)      | rate_imported12 =0.003-0.089 (p36-67) | 38.81 | 0.80 | 24.03 | 0.17 | 8.82E-07  |
| <b>72</b> | med_area_home <16.075 (p47) &POI_den_telecom_elec <193.066 (p62)                                          | rate_imported12 =0.003-0.087 (p36-66) | 41.08 | 0.72 | 24.02 | 0.19 | 1.003E-05 |
| <b>73</b> | med_area_home <18.888 (p57) &build_area_pp <66.954 (p52) &POI_den_telecom_elec <197.000 (p62)             | rate_imported12 =0.003-0.090 (p36-67) | 40.34 | 0.76 | 24.00 | 0.15 | 1.564E-05 |
| <b>74</b> | med_area_home <18.647 (p56) &build_area_pp <59.831 (p50) &POI_den_transport <472.110 (p62)                | rate_imported12 =0.004-0.087 (p36-67) | 38.40 | 0.80 | 23.99 | 0.18 | 3.754E-06 |
| <b>75</b> | prop_preprim_edu <0.136 (p85) &prop_higher_edu <0.253 (p65) &POI_den_edu =10.689-412.222 (p15-77)         | rate_imported12 =0.003-0.090 (p36-67) | 45.60 | 0.65 | 23.98 | 0.13 | 4.353E-05 |
| <b>76</b> | med_area_home <18.394 (p55) &prop_agricultural <0.046 (p79) &POI_den_mall_mkt <104.329 (p62)              | rate_imported12 =0.004-0.083 (p36-65) | 40.66 | 0.71 | 23.96 | 0.12 | 1.915E-05 |
| <b>77</b> | med_income <19851.218 (p65) &den_public_trans =7.873-93.077 (p37-92) &POI_den_mall_mkt <105.844 (p63)     | rate_imported12 =0.004-0.089 (p36-67) | 38.86 | 0.79 | 23.96 | 0.12 | 1.303E-05 |
| <b>78</b> | med_area_home <15.681 (p46) &POI_den_sports <348.045 (p64)                                                | rate_imported12 =0.003-0.087 (p36-66) | 40.88 | 0.72 | 23.92 | 0.18 | 4.81E-06  |
| <b>79</b> | prop_preprim_edu <0.128 (p82) &prop_higher_edu <0.224 (p58) &den_road >6.792 (p31)                        | rate_imported12 =0.002-0.097 (p36-68) | 44.55 | 0.69 | 23.86 | 0.11 | 8.142E-05 |
| <b>80</b> | med_income <19717.770 (p65) &build_area_pp <64.307 (p51)                                                  | rate_imported12 =0.004-0.108 (p36-70) | 52.38 | 0.62 | 23.86 | 0.09 | 8.203E-05 |
| <b>81</b> | med_area_home <18.887 (p57) &prop_agricultural <0.049 (p80) &POI_den_telecom_elec <183.375 (p60)          | rate_imported12 =0.003-0.079 (p36-64) | 39.83 | 0.71 | 23.84 | 0.13 | 1.632E-05 |
| <b>82</b> | med_income <19505.735 (p65) &den_public_trans =6.106-93.761 (p33-92) &POI_den_telecom_elec <212.143 (p64) | rate_imported12 =0.004-0.086 (p36-66) | 39.70 | 0.75 | 23.76 | 0.14 | 7.837E-05 |
| <b>83</b> | gender_ratio <95.542 (p67) &den_public_trans =7.873-93.077 (p37-92)                                       | rate_imported12 =0.003-0.133 (p36-73) | 57.95 | 0.63 | 23.75 | 0.09 | 6.066E-05 |
| <b>84</b> | med_area_home <17.463 (p52) &POI_den_transport =38.999-486.006 (p17-63)                                   | rate_imported12 =0.003-0.085 (p36-66) | 40.04 | 0.73 | 23.75 | 0.23 | 4.609E-07 |
| <b>85</b> | med_income <19735.441 (p65) &prop_private_resid =0.010-0.219 (p27-84)                                     | rate_imported12 =0.002-0.086 (p36-66) | 47.35 | 0.60 | 23.75 | 0.17 | 5.37E-09  |
| <b>86</b> | build_area_pp <63.849 (p51) &POI_den_transport =40.112-1204.130 (p17-77)                                  | rate_imported12 =0.002-0.078 (p36-64) | 43.44 | 0.62 | 23.74 | 0.14 | 6.031E-05 |
| <b>87</b> | med_area_home <16.121 (p47) &POI_den_edu =10.689-412.222 (p15-77)                                         | rate_imported12 =0.004-0.088 (p36-67) | 43.98 | 0.66 | 23.70 | 0.13 | 5.747E-05 |
| <b>88</b> | prop_preprim_edu <0.130 (p83) &med_income <19284.575 (p63) &LU_entropy >0.566 (p52)                       | rate_imported12 =0.003-0.090 (p36-67) | 42.18 | 0.70 | 23.61 | 0.14 | 2.537E-05 |
| <b>89</b> | prop_preprim_edu <0.135 (p84) &med_area_home <16.429 (p49)                                                | rate_imported12 =0.003-0.081 (p36-65) | 48.25 | 0.53 | 23.57 | 0.06 | 7.384E-05 |
| <b>90</b> | prop_higher_edu <0.275 (p70) &prop_agricultural <0.048 (p79) &POI_den_edu =10.689-412.222 (p15-77)        | rate_imported12 =0.004-0.082 (p36-65) | 43.62 | 0.63 | 23.42 | 0.14 | 7.003E-05 |

|     |                                                                                                            |                                       |       |      |       |      |           |
|-----|------------------------------------------------------------------------------------------------------------|---------------------------------------|-------|------|-------|------|-----------|
| 91  | prop_higher_edu <0.300 (p76) &den_public_trans =7.873-93.077 (p37-92) &POI_den_sports <395.798 (p65)       | rate_imported12 =0.004-0.089 (p36-67) | 40.25 | 0.73 | 23.42 | 0.09 | 7.69E-05  |
| 92  | gender_ratio <96.478 (p73) &den_public_trans =6.990-86.032 (p35-91) &POI_den_sports <419.316 (p66)         | rate_imported12 =0.003-0.091 (p36-67) | 42.18 | 0.69 | 23.35 | 0.08 | 1.972E-05 |
| 93  | prop_higher_edu <0.239 (p63) &den_population =4861.224-83419.474 (p35-91)                                  | rate_imported12 =0.002-0.093 (p36-68) | 44.58 | 0.65 | 23.29 | 0.20 | 1.344E-08 |
| 94  | prop_higher_edu <0.241 (p63) &prop_agricultural <0.049 (p80) &LU_entropy >0.538 (p44)                      | rate_imported12 =0.003-0.083 (p36-66) | 40.62 | 0.69 | 23.28 | 0.16 | 3.89E-05  |
| 95  | med_area_home <19.358 (p61) &prop_agricultural <0.045 (p79) &POI_den_transport <488.377 (p63)              | rate_imported12 =0.003-0.080 (p36-64) | 40.00 | 0.69 | 23.27 | 0.14 | 9.172E-06 |
| 96  | med_area_home <18.714 (p57) &prop_transport >0.061 (p35) &POI_den_telecom_elec <192.550 (p62)              | rate_imported12 =0.002-0.082 (p36-65) | 36.97 | 0.78 | 23.24 | 0.17 | 2.874E-06 |
| 97  | prop_preprim_edu <0.128 (p82) &med_income <20156.073 (p73) &POI_den_edu =10.689-412.222 (p15-77)           | rate_imported12 =0.004-0.082 (p36-65) | 44.04 | 0.62 | 23.21 | 0.12 | 6.497E-05 |
| 98  | prop_preprim_edu <0.129 (p82) &build_area_pp <96.254 (p65) &LU_entropy >0.560 (p51)                        | rate_imported12 =0.002-0.128 (p36-72) | 45.24 | 0.75 | 23.19 | 0.09 | 1.636E-05 |
| 99  | gender_ratio <96.269 (p71) &med_area_home <18.007 (p55) &POI_den_mall_mkt <97.869 (p62)                    | rate_imported12 =0.002-0.086 (p36-66) | 39.84 | 0.72 | 23.16 | 0.08 | 7.577E-05 |
| 100 | prop_preprim_edu <0.135 (p84) &build_area_pp <67.205 (p52)                                                 | rate_imported12 =0.002-0.122 (p36-71) | 57.76 | 0.59 | 23.07 | 0.05 | 6.934E-05 |
| 101 | build_area_pp <59.052 (p48) &LU_entropy >0.559 (p50)                                                       | rate_imported12 =0.002-0.077 (p36-64) | 38.16 | 0.70 | 23.03 | 0.21 | 3.026E-05 |
| 102 | med_income <21629.447 (p75) &prop_agricultural <0.048 (p79) &POI_den_edu =10.689-412.222 (p15-77)          | rate_imported12 =0.004-0.082 (p36-65) | 44.26 | 0.61 | 23.03 | 0.13 | 4.515E-05 |
| 103 | prop_preprim_edu <0.127 (p82) &med_income <20297.090 (p73) &POI_den_telecom_elec =11.547-222.397 (p10-65)  | rate_imported12 =0.004-0.085 (p36-66) | 41.70 | 0.67 | 22.99 | 0.16 | 1.424E-05 |
| 104 | med_area_home <22.842 (p81) &prop_agricultural <0.048 (p79) &POI_den_edu =10.689-412.222 (p15-77)          | rate_imported12 =0.004-0.082 (p36-65) | 46.34 | 0.58 | 22.89 | 0.10 | 2.287E-05 |
| 105 | med_income <19402.935 (p63) &prop_agricultural <0.060 (p82) &POI_den_telecom_elec =11.547-254.047 (p10-66) | rate_imported12 =0.003-0.084 (p36-66) | 39.89 | 0.69 | 22.87 | 0.17 | 7.091E-07 |
| 106 | prop_preprim_edu >0.075 (p14) &den_public_trans =4.801-82.617 (p30-90)                                     | rate_imported12 =0.003-0.207 (p36-81) | 71.24 | 0.65 | 22.87 | 0.07 | 8.003E-06 |
| 107 | prop_higher_edu <0.226 (p60) &den_public_trans =6.320-77.509 (p33-88)                                      | rate_imported12 =0.004-0.096 (p36-68) | 44.75 | 0.65 | 22.86 | 0.17 | 1.691E-06 |
| 108 | med_area_home <18.394 (p55) &prop_transport >0.065 (p35) &POI_den_mall_mkt <104.329 (p62)                  | rate_imported12 =0.004-0.083 (p36-65) | 36.97 | 0.76 | 22.83 | 0.17 | 4.956E-06 |
| 109 | med_income <19695.014 (p65) &prop_agricultural <0.068 (p83) &POI_den_transport =38.999-486.006 (p17-63)    | rate_imported12 =0.003-0.083 (p36-65) | 38.04 | 0.73 | 22.79 | 0.16 | 4.363E-07 |

|     |                                                                                                             |                                       |       |      |       |      |           |
|-----|-------------------------------------------------------------------------------------------------------------|---------------------------------------|-------|------|-------|------|-----------|
| 110 | gender_ratio <96.478 (p73) &den_public_trans =6.990-86.032 (p35-91) &POI_den_transport <452.694 (p61)       | rate_imported12 =0.003-0.091 (p36-67) | 38.61 | 0.75 | 22.75 | 0.10 | 1.753E-06 |
| 111 | build_area_pp <58.474 (p48) &prop_transport >0.070 (p36) &POI_den_telecom_elec <433.771 (p77)               | rate_imported12 =0.004-0.083 (p36-66) | 38.27 | 0.72 | 22.73 | 0.13 | 8.185E-05 |
| 112 | med_area_home <18.394 (p55) &prop_transport >0.065 (p35) &POI_den_transport <488.377 (p63)                  | rate_imported12 =0.003-0.082 (p36-65) | 36.36 | 0.77 | 22.72 | 0.18 | 1.033E-06 |
| 113 | gender_ratio <96.478 (p73) &den_public_trans =6.990-86.032 (p35-91) &POI_den_mall_mkt <148.238 (p67)        | rate_imported12 =0.003-0.091 (p36-67) | 41.68 | 0.67 | 22.60 | 0.08 | 4.163E-05 |
| 114 | gender_ratio <95.776 (p69) &med_area_home <19.466 (p61) &POI_den_transport <425.836 (p59)                   | rate_imported12 =0.002-0.093 (p36-68) | 39.90 | 0.72 | 22.58 | 0.13 | 2.072E-05 |
| 115 | prop_higher_edu <0.263 (p66) &prop_agricultural <0.050 (p80) &POI_den_telecom_elec =11.547-254.047 (p10-66) | rate_imported12 =0.004-0.076 (p36-64) | 39.11 | 0.65 | 22.50 | 0.14 | 3.187E-06 |
| 116 | gender_ratio <95.831 (p69) &prop_preprim_edu <0.129 (p82)                                                   | rate_imported12 =0.002-0.196 (p36-80) | 77.00 | 0.61 | 22.45 | 0.07 | 8.695E-06 |
| 117 | gender_ratio <95.202 (p65) &med_area_home <19.225 (p61) &POI_den_telecom_elec <174.743 (p59)                | rate_imported12 =0.004-0.087 (p36-67) | 38.32 | 0.73 | 22.43 | 0.13 | 1.565E-05 |
| 118 | med_area_home <16.202 (p48) &LU_entropy >0.566 (p52)                                                        | rate_imported12 =0.003-0.090 (p36-67) | 41.14 | 0.68 | 22.43 | 0.14 | 6.549E-05 |
| 119 | den_population =14189.352-82431.823 (p45-90) &LU_entropy >0.550 (p49)                                       | rate_imported12 =0.004-0.086 (p36-66) | 40.07 | 0.68 | 22.43 | 0.20 | 3.733E-07 |
| 120 | prop_preprim_edu <0.127 (p82) &med_income <22078.420 (p77) &den_bldg =0.088-0.389 (p30-82)                  | rate_imported12 =0.004-0.135 (p36-73) | 47.61 | 0.70 | 22.40 | 0.10 | 3.665E-05 |
| 121 | gender_ratio <96.488 (p74) &prop_transport >0.062 (p35) &POI_den_transport <522.196 (p64)                   | rate_imported12 =0.003-0.088 (p36-67) | 39.96 | 0.69 | 22.40 | 0.10 | 5.412E-05 |
| 122 | med_income <20092.498 (p73) &prop_transport >0.062 (p35) &POI_den_transport <612.990 (p66)                  | rate_imported12 =0.003-0.086 (p36-66) | 40.08 | 0.68 | 22.39 | 0.12 | 3.309E-05 |
| 123 | prop_preprim_edu <0.129 (p82) &POI_den_telecom_elec =13.135-361.714 (p13-71)                                | rate_imported12 =0.004-0.189 (p36-80) | 66.25 | 0.65 | 22.38 | 0.10 | 1.214E-07 |
| 124 | med_income <19621.899 (p65) &prop_business =0.003-0.087 (p44-90) &POI_den_sports <339.929 (p64)             | rate_imported12 =0.004-0.090 (p36-67) | 35.54 | 0.83 | 22.38 | 0.17 | 2.17E-05  |
| 125 | den_public_trans =3.582-84.723 (p25-91) &build_area_pp <71.228 (p53)                                        | rate_imported12 =0.004-0.084 (p36-66) | 46.06 | 0.54 | 22.35 | 0.10 | 3.119E-05 |
| 126 | med_income <19621.899 (p65) &prop_gov_insti_faci >0.032 (p43)                                               | rate_imported12 =0.004-0.085 (p36-66) | 47.46 | 0.56 | 22.27 | 0.14 | 3.292E-07 |
| 127 | prop_preprim_edu <0.129 (p82) &prop_gov_insti_faci >0.029 (p40) &POI_den_mall_mkt <141.320 (p66)            | rate_imported12 =0.002-0.196 (p36-80) | 48.53 | 0.79 | 22.27 | 0.08 | 2.163E-05 |
| 128 | med_area_home <16.755 (p50)                                                                                 | rate_imported12 =0.002-0.115 (p36-71) | 58.83 | 0.55 | 22.26 | 0.21 | 2.302E-09 |
| 129 | prop_higher_edu <0.233 (p62) &prop_gov_insti_faci >0.035 (p45)                                              | rate_imported12 =0.003-0.095 (p36-68) | 43.40 | 0.65 | 22.19 | 0.20 | 6.686E-08 |

|     |                                                                                                        |                                       |       |      |       |      |           |
|-----|--------------------------------------------------------------------------------------------------------|---------------------------------------|-------|------|-------|------|-----------|
| 130 | prop_preprim_edu <0.130 (p83) &den_bldg >0.081 (p27)<br>&POI_den_telecom_elec <347.789 (p70)           | rate_imported12 =0.002-0.215 (p36-81) | 57.30 | 0.72 | 22.19 | 0.09 | 2.869E-05 |
| 131 | prop_preprim_edu <0.134 (p84) &med_income <20130.817 (p73)<br>&POI_den_sports =45.780-437.190 (p24-67) | rate_imported12 =0.002-0.094 (p36-68) | 39.30 | 0.72 | 22.18 | 0.14 | 3.247E-06 |
| 132 | med_income <20323.607 (p73) &prop_transport >0.056 (p33)<br>&POI_den_mall_mkt <116.205 (p64)           | rate_imported12 =0.003-0.086 (p36-66) | 39.91 | 0.67 | 22.18 | 0.11 | 2.704E-05 |
| 133 | med_area_home <19.970 (p65) &prop_gov_insti_faci >0.027 (p38)<br>&POI_den_transport <1024.689 (p75)    | rate_imported12 =0.003-0.094 (p36-68) | 42.77 | 0.65 | 22.18 | 0.11 | 2.422E-05 |
| 134 | den_public_trans =7.873-93.077 (p37-92) &LU_entropy >0.561 (p51)                                       | rate_imported12 =0.003-0.086 (p36-66) | 43.16 | 0.62 | 22.16 | 0.16 | 2.008E-05 |
| 135 | gender_ratio <96.478 (p73) &prop_transport >0.069 (p36)<br>&POI_den_mall_mkt <117.957 (p64)            | rate_imported12 =0.002-0.096 (p36-68) | 40.02 | 0.70 | 22.07 | 0.09 | 8.812E-06 |
| 136 | prop_preprim_edu <0.129 (p82) &prop_transport >0.055 (p33)<br>&POI_den_mall_mkt <141.320 (p66)         | rate_imported12 =0.002-0.196 (p36-80) | 51.35 | 0.75 | 22.07 | 0.09 | 1.737E-05 |
| 137 | med_income <19851.218 (p65) &den_population =3043.984-80440.162 (p29-89)                               | rate_imported12 =0.004-0.089 (p36-67) | 48.11 | 0.56 | 22.06 | 0.15 | 4.796E-07 |
| 138 | gender_ratio <93.751 (p53) &build_area_pp <75.416 (p54)                                                | rate_imported12 =0.004-0.081 (p36-64) | 44.33 | 0.57 | 22.05 | 0.12 | 3.686E-05 |
| 139 | build_area_pp <58.064 (p47) &prop_transport >0.067 (p35)<br>&POI_den_mall_mkt <105.844 (p63)           | rate_imported12 =0.003-0.073 (p36-64) | 33.53 | 0.78 | 22.00 | 0.18 | 3.149E-06 |
| 140 | prop_preprim_edu <0.133 (p84) &prop_transport >0.064 (p35)<br>&POI_den_sports <458.042 (p68)           | rate_imported12 =0.003-0.198 (p36-80) | 51.04 | 0.76 | 21.99 | 0.08 | 2.397E-06 |
| 141 | prop_preprim_edu <0.127 (p82) &POI_den_transport =40.112-1204.130 (p17-77)                             | rate_imported12 =0.003-0.232 (p36-82) | 71.45 | 0.66 | 21.98 | 0.08 | 1.494E-05 |
| 142 | build_area_pp <56.179 (p46) &POI_den_edu =10.689-412.222 (p15-77)                                      | rate_imported12 =0.003-0.085 (p36-66) | 40.74 | 0.64 | 21.95 | 0.13 | 7.162E-05 |
| 143 | gender_ratio <96.697 (p74) &prop_agricultural <0.046 (p79) &POI_den_sports <382.888 (p65)              | rate_imported12 =0.004-0.098 (p36-68) | 46.07 | 0.61 | 21.93 | 0.11 | 6.806E-05 |
| 144 | prop_higher_edu <0.242 (p63) &prop_agricultural <0.049 (p80)                                           | rate_imported12 =0.003-0.087 (p36-67) | 51.40 | 0.53 | 21.92 | 0.12 | 7.098E-06 |
| 145 | gender_ratio <95.529 (p67) &den_public_trans =7.873-93.077 (p37-92)<br>&POI_den_edu <207.187 (p63)     | rate_imported12 =0.004-0.089 (p36-67) | 36.48 | 0.76 | 21.87 | 0.11 | 3.914E-05 |
| 146 | prop_preprim_edu <0.131 (p83) &POI_den_edu =10.689-412.222 (p15-77)                                    | rate_imported12 =0.003-0.240 (p36-82) | 72.74 | 0.66 | 21.86 | 0.09 | 8.288E-07 |
| 147 | prop_higher_edu <0.296 (p75) &prop_transport >0.056 (p33)<br>&POI_den_telecom_elec <246.746 (p65)      | rate_imported12 =0.003-0.092 (p36-67) | 42.26 | 0.64 | 21.85 | 0.08 | 7.524E-05 |
| 148 | prop_preprim_edu <0.130 (p83) &den_road >5.415 (p26) &POI_den_mall_mkt <142.262 (p67)                  | rate_imported12 =0.002-0.128 (p36-72) | 49.00 | 0.65 | 21.82 | 0.09 | 3.286E-05 |
| 149 | med_income <18745.215 (p62) &prop_transport >0.062 (p35)                                               | rate_imported12 =0.003-0.081 (p36-64) | 49.31 | 0.52 | 21.74 | 0.11 | 1.627E-05 |

|            |                                                                                                       |                                       |       |      |       |      |           |
|------------|-------------------------------------------------------------------------------------------------------|---------------------------------------|-------|------|-------|------|-----------|
| <b>150</b> | gender_ratio <96.439 (p72) &prop_preprim_edu <0.127 (p82) &LU_entropy >0.562 (p52)                    | rate_imported12 =0.003-0.075 (p36-64) | 39.99 | 0.60 | 21.72 | 0.10 | 3.028E-05 |
| <b>151</b> | gender_ratio <96.056 (p71) &prop_preprim_edu <0.135 (p84) &POI_den_transport <547.167 (p65)           | rate_imported12 =0.003-0.105 (p36-69) | 46.60 | 0.62 | 21.69 | 0.10 | 7.642E-05 |
| <b>152</b> | med_income <20126.227 (p73) &prop_business =0.003-0.053 (p44-86) &POI_den_telecom_elec <185.721 (p60) | rate_imported12 =0.002-0.093 (p36-67) | 34.23 | 0.85 | 21.69 | 0.17 | 6.68E-06  |
| <b>153</b> | gender_ratio <94.869 (p64) &med_income <18909.328 (p62)                                               | rate_imported12 =0.001-0.103 (p36-69) | 51.43 | 0.57 | 21.69 | 0.11 | 4.167E-05 |
| <b>154</b> | prop_agricultural <0.047 (p79) &LU_entropy >0.559 (p50)                                               | rate_imported12 =0.002-0.077 (p36-64) | 42.24 | 0.57 | 21.68 | 0.16 | 2.224E-08 |
| <b>155</b> | build_area_pp <67.949 (p52) &prop_private_resid =0.013-0.220 (p31-85)                                 | rate_imported12 =0.003-0.094 (p36-68) | 40.53 | 0.67 | 21.67 | 0.18 | 7.887E-06 |
| <b>156</b> | med_income <19505.735 (p65) &prop_agricultural <0.051 (p80)                                           | rate_imported12 =0.003-0.084 (p36-66) | 53.72 | 0.49 | 21.66 | 0.09 | 9.089E-06 |
| <b>157</b> | build_area_pp <66.552 (p52) &prop_transport >0.060 (p35) &POI_den_transport <428.546 (p59)            | rate_imported12 =0.003-0.078 (p36-64) | 33.56 | 0.78 | 21.43 | 0.19 | 3.02E-05  |
| <b>158</b> | med_area_home <19.409 (p61) &den_road >6.596 (p30) &POI_den_mall_mkt <105.844 (p63)                   | rate_imported12 =0.003-0.082 (p36-65) | 36.45 | 0.70 | 21.37 | 0.16 | 4.185E-05 |
| <b>159</b> | gender_ratio <95.237 (p65) &prop_gov_insti_faci >0.028 (p38)                                          | rate_imported12 =0.003-0.114 (p36-71) | 55.10 | 0.56 | 21.32 | 0.10 | 7.37E-05  |
| <b>160</b> | prop_preprim_edu <0.129 (p82) &prop_higher_edu <0.256 (p65) &POI_den_sports =49.068-381.951 (p25-65)  | rate_imported12 =0.001-0.106 (p36-69) | 37.36 | 0.77 | 21.28 | 0.17 | 1.163E-05 |
| <b>161</b> | prop_higher_edu <0.296 (p75) &prop_transport >0.063 (p35) &POI_den_mall_mkt <127.884 (p65)            | rate_imported12 =0.003-0.092 (p36-67) | 40.03 | 0.66 | 21.27 | 0.08 | 6.289E-05 |
| <b>162</b> | med_income <18908.149 (p62) &den_road >5.527 (p27)                                                    | rate_imported12 =0.003-0.087 (p36-67) | 51.95 | 0.51 | 21.25 | 0.09 | 2.02E-05  |
| <b>163</b> | prop_transport >0.062 (p35) &prop_agricultural <0.049 (p80) &POI_den_transport <439.881 (p59)         | rate_imported12 =0.003-0.081 (p36-64) | 35.17 | 0.73 | 21.24 | 0.13 | 2.54E-05  |
| <b>164</b> | med_area_home <19.806 (p65) &den_road >6.452 (p30) &POI_den_transport <514.562 (p63)                  | rate_imported12 =0.003-0.085 (p36-66) | 37.24 | 0.69 | 21.19 | 0.15 | 2.527E-05 |
| <b>165</b> | med_area_home <17.765 (p55) &build_area_pp <59.277 (p49) &POI_den_edu <188.430 (p62)                  | rate_imported12 =0.001-0.101 (p36-68) | 36.05 | 0.78 | 21.09 | 0.15 | 9.647E-06 |
| <b>166</b> | med_area_home <18.817 (p57) &prop_business =0.003-0.074 (p43-88)                                      | rate_imported12 =0.003-0.088 (p36-67) | 42.34 | 0.60 | 21.08 | 0.14 | 7.339E-05 |
| <b>167</b> | prop_publicResid >0.035 (p69)                                                                         | rate_imported12 =0.002-0.111 (p36-71) | 44.17 | 0.65 | 21.07 | 0.31 | 4.385E-11 |
| <b>168</b> | prop_gov_insti_faci >0.031 (p41) &POI_den_telecom_elec <218.105 (p64)                                 | rate_imported12 =0.003-0.143 (p36-74) | 45.15 | 0.72 | 21.06 | 0.21 | 6.918E-09 |
| <b>169</b> | gender_ratio <96.409 (p72) &prop_agricultural <0.049 (p80) &POI_den_telecom_elec <174.011 (p59)       | rate_imported12 =0.003-0.080 (p36-64) | 39.44 | 0.61 | 21.03 | 0.13 | 3.177E-06 |
| <b>170</b> | den_public_trans =9.794-95.867 (p38-92) &POI_den_edu <249.193 (p65)                                   | rate_imported12 =0.003-0.091 (p36-67) | 40.04 | 0.65 | 21.01 | 0.17 | 2.961E-05 |



|     |                                                                                                       |                                       |       |      |       |      |           |
|-----|-------------------------------------------------------------------------------------------------------|---------------------------------------|-------|------|-------|------|-----------|
| 171 | med_area_home <16.479 (p49) &prop_business =0.003-0.078 (p47-89) &POI_den_transport <476.079 (p62)    | rate_imported12 =0.004-0.080 (p36-64) | 30.69 | 0.90 | 21.01 | 0.21 | 9.694E-06 |
| 172 | med_area_home <16.930 (p51) &prop_business =0.003-0.079 (p47-89) &POI_den_telecom_elec <178.907 (p60) | rate_imported12 =0.004-0.082 (p36-65) | 30.77 | 0.92 | 21.00 | 0.21 | 1.661E-06 |
| 173 | med_area_home <16.253 (p49) &prop_business =0.003-0.074 (p43-88) &POI_den_mall_mkt <84.896 (p59)      | rate_imported12 =0.004-0.094 (p36-68) | 32.05 | 0.91 | 20.98 | 0.19 | 6.436E-06 |
| 174 | med_income <19621.899 (p65) &den_road >6.596 (p30) &POI_den_sports <382.146 (p65)                     | rate_imported12 =0.003-0.087 (p36-67) | 37.53 | 0.68 | 20.95 | 0.14 | 8.315E-05 |
| 175 | med_area_home <19.083 (p60) &prop_gov_insti_faci >0.025 (p36) &POI_den_telecom_elec <171.541 (p59)    | rate_imported12 =0.004-0.090 (p36-67) | 35.38 | 0.75 | 20.95 | 0.14 | 3.172E-05 |
| 176 | med_area_home <20.145 (p67) &den_road >6.596 (p30) &POI_den_telecom_elec <249.524 (p66)               | rate_imported12 =0.003-0.085 (p36-66) | 38.56 | 0.65 | 20.95 | 0.12 | 4.804E-05 |
| 177 | gender_ratio <96.048 (p71) &prop_agricultural <0.047 (p79) &POI_den_edu <188.430 (p62)                | rate_imported12 =0.004-0.086 (p36-66) | 40.75 | 0.61 | 20.93 | 0.12 | 3.187E-05 |
| 178 | gender_ratio <95.669 (p69) &prop_private_resid =0.010-0.219 (p27-84)                                  | rate_imported12 =0.003-0.088 (p36-67) | 48.45 | 0.53 | 20.91 | 0.10 | 2.03E-05  |
| 179 | gender_ratio <96.126 (p71) &prop_gov_insti_faci >0.026 (p38) &POI_den_sports <378.094 (p65)           | rate_imported12 =0.003-0.087 (p36-67) | 38.17 | 0.67 | 20.90 | 0.10 | 1.1E-05   |
| 180 | med_income <21515.682 (p75) &prop_business =0.002-0.040 (p37-84) &POI_den_transport <549.891 (p65)    | rate_imported12 =0.003-0.076 (p36-64) | 36.50 | 0.65 | 20.85 | 0.11 | 6.704E-05 |
| 181 | prop_preprim_edu <0.132 (p84) &den_road >6.792 (p31) &POI_den_sports <374.361 (p64)                   | rate_imported12 =0.003-0.105 (p36-69) | 41.15 | 0.67 | 20.83 | 0.09 | 9.297E-06 |
| 182 | med_income <19407.964 (p63) &den_road >6.596 (p30) &POI_den_mall_mkt <105.844 (p63)                   | rate_imported12 =0.003-0.086 (p36-66) | 36.32 | 0.70 | 20.82 | 0.14 | 2.875E-05 |
| 183 | prop_gov_insti_faci >0.034 (p44) &POI_den_sports <400.252 (p65)                                       | rate_imported12 =0.004-0.137 (p36-74) | 43.47 | 0.72 | 20.82 | 0.21 | 1.215E-06 |
| 184 | den_bldg >0.081 (p27) &build_area_pp <83.201 (p58) &POI_den_telecom_elec <181.077 (p60)               | rate_imported12 =0.003-0.083 (p36-65) | 34.83 | 0.72 | 20.78 | 0.19 | 3.218E-05 |
| 185 | prop_preprim_edu <0.130 (p83) &den_road >5.415 (p26) &POI_den_transport <528.371 (p64)                | rate_imported12 =0.002-0.128 (p36-72) | 45.72 | 0.67 | 20.76 | 0.09 | 1.247E-05 |
| 186 | gender_ratio <96.199 (p71) &den_public_trans =12.043-85.211 (p42-91) &LU_entropy >0.566 (p52)         | rate_imported12 =0.004-0.090 (p36-67) | 36.99 | 0.70 | 20.75 | 0.07 | 5.669E-05 |
| 187 | prop_higher_edu <0.254 (p65) &prop_agricultural <0.050 (p80) &POI_den_sports =40.055-361.877 (p22-64) | rate_imported12 =0.003-0.088 (p36-67) | 35.56 | 0.73 | 20.71 | 0.14 | 2.254E-05 |
| 188 | prop_higher_edu <0.212 (p54) &prop_private_resid =0.010-0.219 (p27-84)                                | rate_imported12 =0.003-0.088 (p36-67) | 38.87 | 0.65 | 20.67 | 0.22 | 2.24E-07  |
| 189 | build_area_pp <68.937 (p52) &prop_gov_insti_faci >0.025 (p36) &POI_den_sports <442.247 (p67)          | rate_imported12 =0.003-0.069 (p36-62) | 33.15 | 0.67 | 20.63 | 0.15 | 4.935E-05 |

|     |                                                                                                                   |                                       |       |      |       |      |           |
|-----|-------------------------------------------------------------------------------------------------------------------|---------------------------------------|-------|------|-------|------|-----------|
| 190 | med_income <19505.735 (p65) &prop_agricultural <0.051 (p80)<br>&POI_den_sports =42.524-353.919 (p23-64)           | rate_imported12 =0.003-0.084 (p36-66) | 34.19 | 0.74 | 20.59 | 0.16 | 5.386E-06 |
| 191 | gender_ratio <95.443 (p66) &prop_agricultural <0.047 (p79)<br>&POI_den_mall_mkt <106.828 (p63)                    | rate_imported12 =0.001-0.093 (p36-68) | 40.42 | 0.63 | 20.53 | 0.12 | 6.752E-05 |
| 192 | den_bldg =0.095-0.347 (p32-78) &build_area_pp <60.696 (p50)                                                       | rate_imported12 =0.004-0.079 (p36-64) | 36.23 | 0.65 | 20.51 | 0.16 | 6.571E-06 |
| 193 | med_income <19402.085 (p63) &POI_den_transport =40.112-1204.130 (p17-77)                                          | rate_imported12 =0.003-0.095 (p36-68) | 46.84 | 0.56 | 20.47 | 0.14 | 2.209E-05 |
| 194 | med_area_home <15.859 (p46) &prop_business =0.003-0.079 (p47-89)<br>&POI_den_edu <181.634 (p62)                   | rate_imported12 =0.003-0.087 (p36-67) | 30.43 | 0.92 | 20.47 | 0.22 | 7.045E-07 |
| 195 | gender_ratio <96.199 (p71) &prop_transport >0.063 (p35)                                                           | rate_imported12 =0.002-0.087 (p36-67) | 54.50 | 0.48 | 20.43 | 0.08 | 4.537E-05 |
| 196 | gender_ratio <95.227 (p65) &den_population =5790.352-78246.851 (p37-89)                                           | rate_imported12 =0.001-0.109 (p36-70) | 49.59 | 0.57 | 20.43 | 0.09 | 2.924E-05 |
| 197 | med_income <18839.224 (p62) &prop_business =0.004-0.051 (p48-86)<br>&POI_den_mall_mkt <125.093 (p65)              | rate_imported12 =0.003-0.091 (p36-67) | 31.98 | 0.85 | 20.40 | 0.16 | 1.54E-05  |
| 198 | prop_business =0.003-0.081 (p47-89) &POI_den_transport =38.999-486.006 (p17-63)                                   | rate_imported12 =0.004-0.142 (p36-74) | 37.62 | 0.83 | 20.39 | 0.26 | 4.407E-08 |
| 199 | med_area_home <19.409 (p61) &den_road >6.596 (p30) &POI_den_sports <316.434 (p63)                                 | rate_imported12 =0.003-0.082 (p36-65) | 34.87 | 0.70 | 20.38 | 0.16 | 3.398E-05 |
| 200 | med_area_home <19.466 (p61) &den_bldg >0.098 (p33) &POI_den_transport <425.836 (p59)                              | rate_imported12 =0.003-0.091 (p36-67) | 33.41 | 0.79 | 20.37 | 0.20 | 3.18E-07  |
| 201 | prop_preprim_edu <0.135 (p84) &build_area_pp <67.205 (p52)<br>&POI_den_telecom_elec <177.637 (p60)                | rate_imported12 =0.002-0.090 (p36-67) | 37.18 | 0.68 | 20.36 | 0.09 | 6.96E-05  |
| 202 | build_area_pp <70.628 (p53) &prop_gov_insti_faci >0.025 (p36)<br>&POI_den_telecom_elec <171.541 (p59)             | rate_imported12 =0.004-0.084 (p36-66) | 32.62 | 0.79 | 20.33 | 0.19 | 5.068E-06 |
| 203 | gender_ratio <96.153 (p71) &prop_business =0.003-0.068 (p47-87)<br>&POI_den_telecom_elec <177.345 (p60)           | rate_imported12 =0.003-0.091 (p36-67) | 32.05 | 0.84 | 20.31 | 0.11 | 3.139E-05 |
| 204 | prop_higher_edu <0.224 (p58) &den_road >6.792 (p31)                                                               | rate_imported12 =0.003-0.084 (p36-66) | 43.52 | 0.55 | 20.30 | 0.16 | 1.002E-06 |
| 205 | gender_ratio <95.505 (p67) &prop_gov_insti_faci >0.025 (p36)<br>&POI_den_telecom_elec <171.541 (p59)              | rate_imported12 =0.004-0.096 (p36-68) | 34.56 | 0.76 | 20.27 | 0.14 | 8.242E-07 |
| 206 | med_area_home <16.479 (p49) &prop_business =0.003-0.078 (p47-89)<br>&POI_den_sports <305.784 (p62)                | rate_imported12 =0.003-0.084 (p36-66) | 29.86 | 0.92 | 20.25 | 0.22 | 2.511E-05 |
| 207 | prop_higher_edu <0.233 (p62) &den_bldg >0.100 (p33)                                                               | rate_imported12 =0.003-0.084 (p36-66) | 44.77 | 0.54 | 20.20 | 0.14 | 2.839E-07 |
| 208 | prop_gov_insti_faci >0.034 (p44) &POI_den_mall_mkt <106.828 (p63)                                                 | rate_imported12 =0.003-0.124 (p36-71) | 39.85 | 0.73 | 20.18 | 0.23 | 6.265E-06 |
| 209 | med_area_home <21.600 (p75) &prop_transport >0.070 (p36)                                                          | rate_imported12 =0.004-0.083 (p36-66) | 53.52 | 0.47 | 20.15 | 0.08 | 2.943E-05 |
| 210 | med_area_home <21.183 (p74) &prop_private_resid =0.013-0.220 (p31-85)<br>&POI_den_sports =51.511-381.357 (p26-65) | rate_imported12 =0.002-0.080 (p36-64) | 33.55 | 0.71 | 20.14 | 0.11 | 2.933E-05 |

|     |                                                                                                                |                                       |       |      |       |      |           |
|-----|----------------------------------------------------------------------------------------------------------------|---------------------------------------|-------|------|-------|------|-----------|
| 211 | prop_business =0.004-0.078 (p50-89) &POI_den_mall_mkt <104.329 (p62)                                           | rate_imported12 =0.001-0.126 (p36-72) | 35.84 | 0.82 | 20.11 | 0.27 | 4.734E-08 |
| 212 | prop_business =0.003-0.071 (p46-88) &POI_den_sports <367.628 (p64)                                             | rate_imported12 =0.002-0.128 (p36-72) | 39.61 | 0.74 | 20.11 | 0.19 | 2.628E-06 |
| 213 | prop_higher_edu <0.261 (p66) &prop_business =0.003-0.054 (p47-86) &POI_den_telecom_elec <217.233 (p64)         | rate_imported12 =0.003-0.094 (p36-68) | 32.75 | 0.81 | 20.08 | 0.13 | 5.058E-05 |
| 214 | den_population =13525.712-86590.585 (p45-91) &POI_den_edu <188.430 (p62)                                       | rate_imported12 =0.003-0.080 (p36-64) | 32.51 | 0.74 | 19.91 | 0.28 | 9.322E-07 |
| 215 | den_bldg >0.081 (p27) &build_area_pp <61.518 (p50) &POI_den_mall_mkt <86.482 (p59)                             | rate_imported12 =0.003-0.074 (p36-64) | 31.08 | 0.75 | 19.87 | 0.16 | 1.092E-05 |
| 216 | prop_higher_edu <0.240 (p63) &POI_den_transport =40.112-1204.130 (p17-77)                                      | rate_imported12 =0.003-0.085 (p36-66) | 44.94 | 0.53 | 19.85 | 0.13 | 9.678E-06 |
| 217 | build_area_pp <64.307 (p51)                                                                                    | rate_imported12 =0.002-0.119 (p36-71) | 56.57 | 0.54 | 19.83 | 0.19 | 1.392E-08 |
| 218 | prop_higher_edu <0.261 (p66) &prop_business =0.003-0.054 (p47-86)                                              | rate_imported12 =0.003-0.094 (p36-68) | 37.45 | 0.66 | 19.82 | 0.18 | 5.691E-07 |
| 219 | prop_preprim_edu >0.080 (p19) &den_population =5790.352-78246.851 (p37-89)                                     | rate_imported12 =0.001-0.119 (p36-71) | 49.94 | 0.58 | 19.81 | 0.09 | 6.704E-05 |
| 220 | gender_ratio <96.056 (p71) &den_bldg >0.103 (p34) &POI_den_transport <547.167 (p65)                            | rate_imported12 =0.003-0.089 (p36-67) | 36.56 | 0.67 | 19.81 | 0.10 | 2.45E-05  |
| 221 | build_area_pp <68.937 (p52) &prop_gov_insti_faci >0.025 (p36) &POI_den_transport <418.284 (p58)                | rate_imported12 =0.003-0.085 (p36-66) | 31.58 | 0.78 | 19.77 | 0.19 | 1.72E-05  |
| 222 | med_income <21376.057 (p75) &prop_private_resid =0.022-0.228 (p36-85) &POI_den_sports =39.533-357.737 (p22-64) | rate_imported12 =0.003-0.083 (p36-65) | 31.45 | 0.79 | 19.72 | 0.19 | 8.888E-06 |
| 223 | prop_higher_edu <0.214 (p55) &prop_transport >0.092 (p39)                                                      | rate_imported12 =0.002-0.085 (p36-66) | 39.09 | 0.60 | 19.54 | 0.19 | 2.569E-06 |
| 224 | prop_agricultural <0.054 (p81) &POI_den_transport =31.335-969.972 (p14-73)                                     | rate_imported12 =0.003-0.081 (p36-64) | 48.00 | 0.49 | 19.51 | 0.09 | 2.67E-05  |
| 225 | den_road >5.514 (p27) &build_area_pp <78.671 (p56) &POI_den_transport <396.222 (p58)                           | rate_imported12 =0.004-0.087 (p36-67) | 33.89 | 0.71 | 19.51 | 0.16 | 8.177E-05 |
| 226 | prop_agricultural <0.050 (p80) &POI_den_telecom_elec =11.547-254.047 (p10-66)                                  | rate_imported12 =0.003-0.075 (p36-64) | 42.10 | 0.51 | 19.51 | 0.13 | 6.384E-07 |
| 227 | med_income <18909.328 (p62) &den_bldg =0.087-0.362 (p29-80)                                                    | rate_imported12 =0.003-0.078 (p36-64) | 39.33 | 0.56 | 19.43 | 0.15 | 1.504E-06 |
| 228 | prop_gov_insti_faci >0.028 (p39) &LU_entropy >0.552 (p49)                                                      | rate_imported12 =0.002-0.098 (p36-68) | 43.06 | 0.58 | 19.35 | 0.14 | 9.098E-06 |
| 229 | prop_gov_insti_faci >0.028 (p39) &POI_den_transport <493.197 (p63)                                             | rate_imported12 =0.002-0.092 (p36-67) | 38.51 | 0.62 | 19.29 | 0.19 | 1.441E-07 |
| 230 | gender_ratio <96.478 (p73) &POI_den_transport =50.731-764.399 (p19-69)                                         | rate_imported12 =0.003-0.091 (p36-67) | 45.19 | 0.54 | 19.26 | 0.10 | 1.058E-05 |
| 231 | med_area_home <18.890 (p57) &den_bldg >0.112 (p36) &POI_den_edu <188.430 (p62)                                 | rate_imported12 =0.003-0.090 (p36-67) | 31.96 | 0.77 | 19.12 | 0.18 | 4.063E-06 |

|     |                                                                                                                   |                                       |       |      |       |      |           |
|-----|-------------------------------------------------------------------------------------------------------------------|---------------------------------------|-------|------|-------|------|-----------|
| 232 | prop_business =0.003-0.068 (p47-87) &prop_gov_insti_faci >0.033 (p43) &POI_den_telecom_elec <177.345 (p60)        | rate_imported12 =0.003-0.122 (p36-71) | 31.54 | 0.90 | 19.03 | 0.11 | 9.176E-07 |
| 233 | prop_gov_insti_faci >0.027 (p38) &prop_transport >0.060 (p35) &POI_den_transport <428.546 (p59)                   | rate_imported12 =0.003-0.078 (p36-64) | 30.86 | 0.73 | 18.95 | 0.15 | 3.02E-05  |
| 234 | prop_preprim_edu <0.133 (p84) &prop_higher_edu <0.246 (p64) &POI_den_mall_mkt =23.559-142.109 (p36-67)            | rate_imported12 =0.003-0.091 (p36-67) | 31.50 | 0.77 | 18.94 | 0.11 | 1.067E-05 |
| 235 | den_bldg >0.112 (p36) &prop_gov_insti_faci >0.026 (p38) &POI_den_telecom_elec <183.001 (p60)                      | rate_imported12 =0.002-0.116 (p36-71) | 33.15 | 0.81 | 18.90 | 0.15 | 3.377E-05 |
| 236 | prop_business =0.004-0.078 (p50-89) &POI_den_telecom_elec <174.335 (p59)                                          | rate_imported12 =0.003-0.115 (p36-71) | 32.17 | 0.83 | 18.84 | 0.31 | 2.013E-09 |
| 237 | med_income <19309.602 (p63) &prop_business =0.003-0.054 (p48-86)                                                  | rate_imported12 =0.002-0.102 (p36-69) | 36.81 | 0.67 | 18.83 | 0.17 | 3.529E-06 |
| 238 | prop_agricultural <0.050 (p80) &POI_den_sports =40.055-361.877 (p22-64)                                           | rate_imported12 =0.003-0.088 (p36-67) | 39.09 | 0.59 | 18.83 | 0.12 | 7.629E-05 |
| 239 | prop_transport >0.091 (p39) &LU_entropy >0.551 (p49)                                                              | rate_imported12 =0.003-0.087 (p36-67) | 39.41 | 0.57 | 18.72 | 0.15 | 1.998E-05 |
| 240 | prop_preprim_edu <0.133 (p84) &POI_den_sports =40.055-361.877 (p22-64)                                            | rate_imported12 =0.002-0.104 (p36-69) | 43.01 | 0.58 | 18.68 | 0.09 | 1.744E-05 |
| 241 | den_road >5.679 (p27) &prop_business =0.003-0.081 (p47-89) &POI_den_transport <383.279 (p57)                      | rate_imported12 =0.003-0.122 (p36-71) | 31.17 | 0.88 | 18.62 | 0.08 | 1.959E-05 |
| 242 | prop_transport >0.103 (p43) &POI_den_telecom_elec <177.715 (p60)                                                  | rate_imported12 =0.003-0.080 (p36-64) | 30.39 | 0.74 | 18.62 | 0.34 | 4.031E-08 |
| 243 | prop_higher_edu <0.254 (p65) &prop_private_resid =0.022-0.228 (p36-85) &POI_den_sports =40.868-344.556 (p22-64)   | rate_imported12 =0.004-0.072 (p36-64) | 28.07 | 0.78 | 18.56 | 0.20 | 1.991E-05 |
| 244 | prop_private_resid =0.004-0.226 (p21-85) &prop_business =0.003-0.054 (p48-86)                                     | rate_imported12 =0.003-0.254 (p36-83) | 45.22 | 0.79 | 18.51 | 0.13 | 6.233E-06 |
| 245 | med_income <20156.073 (p73) &POI_den_edu =10.689-412.222 (p15-77)                                                 | rate_imported12 =0.003-0.086 (p36-66) | 45.95 | 0.50 | 18.51 | 0.11 | 5.135E-05 |
| 246 | med_area_home <22.030 (p78) &den_road >6.792 (p31)                                                                | rate_imported12 =0.004-0.079 (p36-64) | 50.80 | 0.45 | 18.42 | 0.07 | 3.478E-05 |
| 247 | den_public_trans =13.940-70.916 (p45-86)                                                                          | rate_imported12 =0.003-0.146 (p36-74) | 52.30 | 0.59 | 18.28 | 0.21 | 4.451E-08 |
| 248 | med_income <19381.772 (p63) &prop_private_resid =0.022-0.228 (p36-85) &POI_den_transport =58.916-397.463 (p22-58) | rate_imported12 =0.003-0.080 (p36-64) | 27.10 | 0.88 | 18.28 | 0.25 | 3.732E-05 |
| 249 | prop_preprim_edu >0.083 (p22) &prop_transport >0.092 (p39)                                                        | rate_imported12 =0.002-0.090 (p36-67) | 46.77 | 0.50 | 18.27 | 0.09 | 4.43E-05  |
| 250 | gender_ratio <95.227 (p65) &den_population =5790.352-78246.851 (p37-89) &POI_den_transport <380.617 (p57)         | rate_imported12 =0.004-0.095 (p36-68) | 30.24 | 0.79 | 18.25 | 0.08 | 3.139E-05 |
| 251 | prop_higher_edu <0.275 (p70) &POI_den_edu =10.689-412.222 (p15-77)                                                | rate_imported12 =0.004-0.082 (p36-65) | 45.35 | 0.49 | 18.24 | 0.10 | 6.591E-05 |
| 252 | den_bldg >0.113 (p37) &POI_den_sports <403.902 (p65)                                                              | rate_imported12 =0.003-0.128 (p36-72) | 41.82 | 0.64 | 18.21 | 0.20 | 6.083E-06 |
| 253 | build_area_pp <75.510 (p55) &prop_gov_insti_faci >0.025 (p36)                                                     | rate_imported12 =0.002-0.068 (p36-62) | 38.13 | 0.44 | 18.18 | 0.08 | 3.424E-05 |

|            |                                                                                                              |                                       |       |      |       |      |           |
|------------|--------------------------------------------------------------------------------------------------------------|---------------------------------------|-------|------|-------|------|-----------|
| <b>254</b> | den_road >6.274 (p30) &LU_entropy >0.566 (p52)                                                               | rate_imported12 =0.004-0.085 (p36-66) | 41.06 | 0.53 | 18.14 | 0.10 | 1.783E-05 |
| <b>255</b> | prop_business =0.004-0.084 (p49-90) &POI_den_edu =7.872-186.946 (p12-62)                                     | rate_imported12 =0.002-0.111 (p36-71) | 32.31 | 0.77 | 18.13 | 0.26 | 1.147E-07 |
| <b>256</b> | prop_business =0.003-0.070 (p44-88)                                                                          | rate_imported12 =0.002-0.207 (p36-81) | 59.26 | 0.64 | 18.10 | 0.19 | 3.968E-08 |
| <b>257</b> | den_bldg >0.112 (p36) &build_area_pp <60.487 (p50) &POI_den_edu <188.430 (p62)                               | rate_imported12 =0.003-0.090 (p36-67) | 29.02 | 0.81 | 18.06 | 0.20 | 1.663E-05 |
| <b>258</b> | prop_transport >0.094 (p40) &POI_den_edu <188.430 (p62)                                                      | rate_imported12 =0.005-0.083 (p36-65) | 32.44 | 0.66 | 18.01 | 0.25 | 4.368E-06 |
| <b>259</b> | den_public_trans =11.541-64.163 (p40-85) &prop_gov_insti_faci >0.028 (p39) &POI_den_transport <421.770 (p58) | rate_imported12 =0.004-0.086 (p36-66) | 28.36 | 0.80 | 17.81 | 0.08 | 5.223E-05 |
| <b>260</b> | den_road >6.792 (p31) &POI_den_transport <668.661 (p66)                                                      | rate_imported12 =0.003-0.099 (p36-68) | 41.89 | 0.56 | 17.68 | 0.16 | 1.87E-05  |
| <b>261</b> | den_road >8.553 (p41) &POI_den_sports <416.114 (p66)                                                         | rate_imported12 =0.004-0.109 (p36-70) | 36.66 | 0.64 | 17.30 | 0.22 | 5.737E-06 |
| <b>262</b> | prop_transport >0.128 (p52) &POI_den_mall_mkt <106.881 (p63)                                                 | rate_imported12 =0.004-0.087 (p36-67) | 27.89 | 0.79 | 17.29 | 0.37 | 7.363E-09 |
| <b>263</b> | gender_ratio <93.726 (p53)                                                                                   | rate_imported12 =0.003-0.105 (p36-69) | 55.16 | 0.48 | 17.25 | 0.15 | 3.542E-07 |
| <b>264</b> | prop_preprim_edu >0.090 (p35) &prop_gov_insti_faci >0.030 (p40)                                              | rate_imported12 =0.003-0.090 (p36-67) | 40.61 | 0.53 | 17.24 | 0.11 | 3.875E-05 |
| <b>265</b> | den_bldg >0.124 (p39) &POI_den_mall_mkt <162.791 (p69)                                                       | rate_imported12 =0.002-0.087 (p36-67) | 36.44 | 0.57 | 17.11 | 0.18 | 8.978E-06 |
| <b>266</b> | prop_transport >0.119 (p50) &POI_den_transport <436.867 (p59)                                                | rate_imported12 =0.003-0.078 (p36-64) | 26.61 | 0.78 | 16.99 | 0.38 | 3.043E-08 |
| <b>267</b> | den_bldg >0.124 (p39) &POI_den_telecom_elec <177.715 (p60)                                                   | rate_imported12 =0.003-0.087 (p36-67) | 31.30 | 0.65 | 16.92 | 0.27 | 4.593E-08 |
| <b>268</b> | gender_ratio <93.642 (p53) &den_bldg >0.124 (p39) &POI_den_telecom_elec <177.715 (p60)                       | rate_imported12 =0.003-0.084 (p36-66) | 25.93 | 0.84 | 16.82 | 0.19 | 5.855E-06 |
| <b>269</b> | prop_private_resid =0.004-0.226 (p21-85)                                                                     | rate_imported12 =0.003-0.254 (p36-83) | 80.21 | 0.59 | 16.74 | 0.12 | 1.506E-07 |
| <b>270</b> | den_road >7.146 (p34) &POI_den_edu <209.057 (p63)                                                            | rate_imported12 =0.002-0.088 (p36-67) | 36.21 | 0.56 | 16.60 | 0.17 | 3.762E-05 |
| <b>271</b> | prop_preprim_edu >0.083 (p23) &den_road >8.068 (p38)                                                         | rate_imported12 =0.004-0.084 (p36-66) | 44.71 | 0.47 | 16.59 | 0.09 | 3.893E-05 |
| <b>272</b> | den_bldg >0.112 (p36) &POI_den_transport <421.770 (p58)                                                      | rate_imported12 =0.003-0.088 (p36-67) | 32.22 | 0.63 | 16.58 | 0.24 | 4.606E-07 |
| <b>273</b> | den_population =13178.148-61556.392 (p44-81) &POI_den_mall_mkt <99.356 (p62)                                 | rate_imported12 =0.003-0.078 (p36-64) | 26.81 | 0.73 | 16.55 | 0.29 | 4.86E-06  |
| <b>274</b> | gender_ratio <96.439 (p72) &POI_den_edu =29.847-182.989 (p27-62)                                             | rate_imported12 =0.003-0.075 (p36-64) | 32.18 | 0.56 | 16.54 | 0.12 | 3.834E-06 |
| <b>275</b> | prop_gov_insti_faci >0.031 (p41)                                                                             | rate_imported12 =0.003-0.124 (p36-71) | 61.92 | 0.49 | 16.39 | 0.13 | 3.895E-08 |
| <b>276</b> | den_population >28322.843 (p61) &prop_private_resid =0.022-0.228 (p36-85)                                    | rate_imported12 =0.004-0.090 (p36-67) | 30.08 | 0.64 | 16.35 | 0.17 | 2.969E-05 |
| <b>277</b> | prop_private_resid =0.022-0.228 (p36-85) &POI_den_sports =39.533-357.737 (p22-64)                            | rate_imported12 =0.005-0.062 (p36-59) | 28.64 | 0.53 | 16.35 | 0.16 | 2.555E-05 |
| <b>278</b> | prop_transport >0.131 (p52) &POI_den_sports <320.746 (p63)                                                   | rate_imported12 =0.003-0.091 (p36-67) | 26.52 | 0.80 | 16.33 | 0.38 | 7.363E-09 |
| <b>279</b> | den_road >9.124 (p43) &POI_den_mall_mkt <105.844 (p63)                                                       | rate_imported12 =0.002-0.105 (p36-69) | 31.22 | 0.69 | 16.14 | 0.27 | 3.047E-07 |
| <b>280</b> | prop_preprim_edu <0.126 (p81) &med_income <15470.453 (p39) &POI_den_mall_mkt <95.198 (p60)                   | rate_imported12 =0.004-0.098 (p36-68) | 26.29 | 0.83 | 16.12 | 0.24 | 1.369E-05 |

|            |                                                                                                   |                                       |       |      |       |      |           |
|------------|---------------------------------------------------------------------------------------------------|---------------------------------------|-------|------|-------|------|-----------|
| <b>281</b> | prop_private_resid =0.022-0.228 (p36-85) &POI_den_transport =58.916-397.463 (p22-58)              | rate_imported12 =0.004-0.069 (p36-62) | 27.66 | 0.60 | 15.93 | 0.18 | 1.259E-05 |
| <b>282</b> | prop_private_resid =0.022-0.228 (p36-85) &POI_den_telecom_elec =35.039-212.421 (p26-64)           | rate_imported12 =0.004-0.068 (p36-62) | 27.93 | 0.58 | 15.81 | 0.16 | 6.417E-05 |
| <b>283</b> | prop_preprim_edu <0.134 (p84) &den_population >28322.843 (p61) &POI_den_transport <421.427 (p58)  | rate_imported12 =0.004-0.079 (p36-64) | 22.22 | 0.90 | 15.22 | 0.03 | 9.634E-07 |
| <b>284</b> | den_population =18750.995-80373.241 (p50-89)                                                      | rate_imported12 =0.004-0.082 (p36-65) | 37.27 | 0.45 | 15.07 | 0.18 | 8.436E-09 |
| <b>285</b> | den_road >9.364 (p44) &POI_den_telecom_elec <177.715 (p60)                                        | rate_imported12 =0.003-0.080 (p36-64) | 26.15 | 0.67 | 15.06 | 0.31 | 2.537E-08 |
| <b>286</b> | den_population =10614.285-60830.356 (p42-81) &POI_den_transport <374.683 (p57)                    | rate_imported12 =0.003-0.068 (p36-62) | 23.56 | 0.69 | 15.03 | 0.30 | 7.268E-06 |
| <b>287</b> | POI_den_sports =51.286-360.682 (p26-64)                                                           | rate_imported12 =0.004-0.111 (p36-71) | 42.19 | 0.52 | 14.68 | 0.18 | 8.623E-07 |
| <b>288</b> | POI_den_edu =10.689-412.222 (p15-77)                                                              | rate_imported12 =0.003-0.240 (p36-82) | 74.78 | 0.57 | 14.67 | 0.11 | 3.956E-06 |
| <b>289</b> | POI_den_transport =103.949-504.827 (p30-63)                                                       | rate_imported12 =0.003-0.095 (p36-68) | 35.96 | 0.52 | 14.24 | 0.21 | 6.721E-06 |
| <b>290</b> | prop_transport >0.087 (p38)                                                                       | rate_imported12 =0.003-0.078 (p36-64) | 50.15 | 0.39 | 14.13 | 0.11 | 1.68E-06  |
| <b>291</b> | den_bldg >0.146 (p43) &LU_entropy >0.570 (p53)                                                    | rate_imported12 =0.002-0.128 (p36-72) | 33.29 | 0.63 | 14.11 | 0.14 | 5.819E-05 |
| <b>292</b> | den_population =13475.738-56328.069 (p45-80) &POI_den_sports <280.418 (p60)                       | rate_imported12 =0.003-0.067 (p36-62) | 22.28 | 0.67 | 14.08 | 0.27 | 2.725E-05 |
| <b>293</b> | build_area_pp <69.988 (p53) &prop_business =0.005-0.066 (p53-87) &POI_den_mall_mkt <123.207 (p65) | rate_imported12 =0.003-0.068 (p36-62) | 20.55 | 0.79 | 14.05 | 0.17 | 3.986E-05 |
| <b>294</b> | den_bldg =0.096-0.297 (p32-73)                                                                    | rate_imported12 =0.004-0.143 (p36-74) | 44.53 | 0.55 | 13.78 | 0.17 | 2.574E-05 |
| <b>295</b> | den_public_trans =12.345-46.981 (p42-78) &POI_den_mall_mkt <103.311 (p62)                         | rate_imported12 =0.003-0.086 (p36-66) | 24.92 | 0.67 | 13.77 | 0.20 | 5.285E-05 |
| <b>296</b> | LU_entropy >0.561 (p51)                                                                           | rate_imported12 =0.002-0.096 (p36-68) | 45.97 | 0.44 | 13.74 | 0.13 | 6.214E-05 |
| <b>297</b> | POI_den_telecom_elec =73.296-174.511 (p41-59)                                                     | rate_imported12 =0.003-0.081 (p36-64) | 25.71 | 0.61 | 13.54 | 0.32 | 5.162E-08 |
| <b>298</b> | den_road >6.792 (p31)                                                                             | rate_imported12 =0.004-0.079 (p36-64) | 52.66 | 0.36 | 11.52 | 0.08 | 8.228E-07 |
| <b>299</b> | den_population =8304.569-47145.016 (p39-74) &POI_den_telecom_elec <206.748 (p64)                  | rate_imported12 =0.004-0.094 (p36-68) | 22.11 | 0.62 | 11.31 | 0.20 | 6.699E-07 |
| <b>300</b> | prop_grassland <0.023 (p50) &POI_den_telecom_elec <174.335 (p59)                                  | rate_imported12 =0.003-0.079 (p36-64) | 19.72 | 0.65 | 11.03 | 0.30 | 2.625E-05 |
| <b>301</b> | den_public_trans =14.057-39.887 (p46-73) &POI_den_telecom_elec <174.335 (p59)                     | rate_imported12 =0.002-0.075 (p36-64) | 18.14 | 0.69 | 10.92 | 0.26 | 6.422E-06 |
| <b>302</b> | den_public_trans =18.568-45.750 (p53-78) &POI_den_transport <410.387 (p58)                        | rate_imported12 =0.006-0.058 (p36-57) | 14.59 | 0.68 | 10.14 | 0.29 | 9.544E-06 |
| <b>303</b> | prop_shrubland <0.023 (p37) &POI_den_telecom_elec <213.848 (p64)                                  | rate_imported12 =0.003-0.097 (p36-68) | 16.15 | 0.78 | 9.59  | 0.41 | 8.826E-06 |
| <b>304</b> | prop_shrubland <0.023 (p37) &POI_den_transport <520.651 (p64)                                     | rate_imported12 =0.004-0.093 (p36-68) | 15.65 | 0.76 | 9.28  | 0.40 | 2.128E-05 |
| <b>305</b> | prop_agricultural <0.063 (p82)                                                                    | rate_imported12 =0.003-0.082 (p36-65) | 60.20 | 0.34 | 8.85  | 0.05 | 7.916E-05 |

|            |                                                                            |                                       |        |      |       |      |           |
|------------|----------------------------------------------------------------------------|---------------------------------------|--------|------|-------|------|-----------|
| <b>306</b> | POI_den_edu =104.122-568.992 (p51-80) &POI_den_telecom_elec <167.092 (p58) | rate_imported12 =0.004-0.090 (p36-67) | 13.52  | 0.85 | 8.63  | 0.43 | 1.491E-05 |
| <b>307</b> | den_population >47145.016 (p74) &POI_den_telecom_elec <206.748 (p64)       | rate_imported12 =0.004-0.094 (p36-68) | 12.86  | 0.81 | 8.10  | 0.35 | 7.595E-05 |
| <b>308</b> | den_public_trans >39.887 (p73) &POI_den_telecom_elec <174.335 (p59)        | rate_imported12 =0.002-0.075 (p36-64) | 10.94  | 0.87 | 7.50  | 0.50 | 2.137E-05 |
| <b>309</b> | prop_higher_edu >0.261 (p66) &prop_business =0.003-0.054 (p47-86)          | rate_imported12 =0.094-0.211 (p68-81) | 10.86  | 0.40 | 7.24  | 0.19 | 6.52E-05  |
| <b>310</b> | den_population >56328.069 (p80) &POI_den_sports <280.418 (p60)             | rate_imported12 =0.003-0.067 (p36-62) | 8.77   | 0.96 | 6.51  | 0.55 | 7.007E-05 |
| <b>311</b> | den_population >61556.392 (p81) &POI_den_mall_mkt <99.356 (p62)            | rate_imported12 =0.003-0.078 (p36-64) | 8.88   | 0.97 | 6.30  | 0.55 | 5.878E-06 |
| <b>312</b> | den_public_trans >46.981 (p78) &POI_den_mall_mkt <103.311 (p62)            | rate_imported12 =0.003-0.086 (p36-66) | 9.56   | 0.86 | 6.25  | 0.49 | 8.109E-05 |
| <b>313</b> | den_population >60830.356 (p81) &POI_den_transport <374.683 (p57)          | rate_imported12 =0.003-0.068 (p36-62) | 7.84   | 1.00 | 5.87  | 0.60 | 5.465E-05 |
| <b>314</b> | med_income >19309.602 (p63) &prop_business =0.003-0.054 (p48-86)           | rate_imported12 =0.102-0.213 (p69-81) | 8.34   | 0.31 | 5.14  | 0.13 | 6.018E-05 |
| <b>315</b> | den_public_trans >45.750 (p78) &POI_den_transport <410.387 (p58)           | rate_imported12 =0.006-0.058 (p36-57) | 6.41   | 0.80 | 4.74  | 0.52 | 2.175E-05 |
| <b>316</b> | den_public_trans >37.524 (p70) &POI_den_sports <121.205 (p43)              | rate_imported12 =0.006-0.029 (p36-46) | 5.00   | 1.00 | 4.53  | 0.84 | 6.238E-08 |
| <b>317</b> | POI_den_sports =360.682-802.233 (p64-78)                                   | rate_imported12 =0.111-0.216 (p71-81) | 7.04   | 0.24 | 3.69  | 0.13 | 7.558E-05 |
| <b>318</b> | prop_grassland <0.010 (p35) &POI_den_transport <201.029 (p45)              | rate_imported12 =0.002-0.033 (p36-47) | 3.11   | 0.69 | 2.59  | 0.56 | 7.166E-07 |
| <b>319</b> | med_income <19043.072 (p63)                                                | rate_imported12 <0.109 (p70)          | 116.90 | 0.86 | 22.90 | 0.17 | 1.01E-14  |
| <b>320</b> | prop_higher_edu <0.239 (p63) &prop_publicResid <0.005 (p56)                | rate_imported12 <0.002 (p36)          | 40.34  | 0.70 | 19.56 | 0.25 | 3.634E-07 |
| <b>321</b> | med_income <19735.441 (p65) &prop_private_resid <0.010 (p27)               | rate_imported12 <0.002 (p36)          | 34.21  | 0.75 | 17.73 | 0.10 | 8.104E-05 |
| <b>322</b> | prop_preprim_edu >0.080 (p19) &ave_household_size <3.213 (p87)             | rate_imported12 <0.116 (p71)          | 124.99 | 0.82 | 17.48 | 0.05 | 4.987E-05 |
| <b>323</b> | prop_higher_edu <0.212 (p54) &prop_private_resid <0.010 (p27)              | rate_imported12 <0.003 (p36)          | 32.90  | 0.76 | 17.28 | 0.11 | 8.104E-05 |
| <b>324</b> | prop_higher_edu <0.233 (p62) &prop_gov_insti_faci <0.035 (p45)             | rate_imported12 <0.003 (p36)          | 39.85  | 0.63 | 17.18 | 0.14 | 1.972E-05 |
| <b>325</b> | prop_higher_edu <0.239 (p63) &den_population <4861.224 (p35)               | rate_imported12 <0.002 (p36)          | 34.62  | 0.71 | 17.08 | 0.18 | 2.684E-05 |
| <b>326</b> | prop_preprim_edu >0.090 (p35) &prop_gov_insti_faci <0.030 (p40)            | rate_imported12 <0.003 (p36)          | 39.12  | 0.63 | 16.86 | 0.12 | 7.46E-05  |
| <b>327</b> | med_income <19851.218 (p65) &den_population <3043.984 (p29)                | rate_imported12 <0.004 (p36)          | 30.14  | 0.80 | 16.51 | 0.21 | 3.585E-06 |
| <b>328</b> | prop_preprim_edu >0.124 (p80)                                              | rate_imported12 <0.003 (p36)          | 31.02  | 0.74 | 15.92 | 0.38 | 1.215E-08 |
| <b>329</b> | prop_private_resid <0.004 (p21)                                            | rate_imported12 <0.003 (p36)          | 32.00  | 0.71 | 15.85 | 0.35 | 3.29E-08  |
| <b>330</b> | med_income <19621.899 (p65) &prop_gov_insti_faci <0.032 (p43)              | rate_imported12 <0.004 (p36)          | 36.31  | 0.64 | 15.81 | 0.14 | 1.271E-05 |
| <b>331</b> | prop_higher_edu <0.214 (p55) &prop_transport <0.092 (p39)                  | rate_imported12 <0.002 (p36)          | 33.95  | 0.66 | 15.49 | 0.19 | 3.837E-05 |
| <b>332</b> | prop_higher_edu <0.226 (p60) &den_public_trans <6.320 (p33)                | rate_imported12 <0.004 (p36)          | 31.58  | 0.70 | 15.30 | 0.18 | 2.42E-05  |
| <b>333</b> | prop_higher_edu <0.213 (p54) &build_area_pp >62.720 (p50)                  | rate_imported12 <0.001 (p36)          | 32.36  | 0.67 | 15.08 | 0.20 | 9.105E-06 |
| <b>334</b> | prop_business <0.003 (p44)                                                 | rate_imported12 <0.002 (p36)          | 48.55  | 0.52 | 14.79 | 0.16 | 1.326E-05 |
| <b>335</b> | prop_higher_edu =0.128-0.263 (p17-66)                                      | rate_imported12 <0.101 (p68)          | 87.37  | 0.81 | 14.72 | 0.14 | 2.114E-05 |
| <b>336</b> | med_income <18922.890 (p62) &den_public_trans <6.320 (p33)                 | rate_imported12 <0.004 (p36)          | 28.11  | 0.73 | 14.32 | 0.22 | 3.382E-05 |
| <b>337</b> | prop_higher_edu <0.224 (p58) &den_road <6.792 (p31)                        | rate_imported12 <0.003 (p36)          | 30.15  | 0.66 | 13.71 | 0.15 | 5.911E-05 |
| <b>338</b> | den_public_trans <3.226 (p23)                                              | rate_imported12 <0.003 (p36)          | 31.53  | 0.63 | 13.43 | 0.27 | 2.411E-06 |

|     |                                                                                                                                     |                              |        |      |       |      |           |
|-----|-------------------------------------------------------------------------------------------------------------------------------------|------------------------------|--------|------|-------|------|-----------|
| 339 | build_area_pp >69.910 (p53) &prop_agricultural >0.068 (p83)                                                                         | rate_imported12 <0.003 (p36) | 23.66  | 0.82 | 13.32 | 0.14 | 8.83E-06  |
| 340 | med_income <18745.215 (p62) &prop_transport <0.062 (p35)                                                                            | rate_imported12 <0.003 (p36) | 26.66  | 0.72 | 13.27 | 0.21 | 7.551E-05 |
| 341 | build_area_pp >68.387 (p52) &prop_rural_set >0.024 (p65)                                                                            | rate_imported12 <0.003 (p36) | 27.92  | 0.67 | 13.02 | 0.21 | 4.364E-07 |
| 342 | med_income <18909.328 (p62) &den_bldg <0.087 (p29)                                                                                  | rate_imported12 <0.003 (p36) | 24.80  | 0.76 | 12.99 | 0.24 | 3.227E-05 |
| 343 | prop_higher_edu <0.233 (p62) &den_bldg <0.100 (p33)                                                                                 | rate_imported12 <0.003 (p36) | 29.77  | 0.64 | 12.91 | 0.15 | 4.727E-05 |
| 344 | prop_gov_insti_faci <0.031 (p41)                                                                                                    | rate_imported12 <0.003 (p36) | 44.26  | 0.51 | 12.82 | 0.15 | 7.142E-05 |
| 345 | med_income <18908.149 (p62) &den_road <5.527 (p27)                                                                                  | rate_imported12 <0.003 (p36) | 23.52  | 0.74 | 12.11 | 0.20 | 4.679E-05 |
| 346 | ave_household_size <3.251 (p87)                                                                                                     | rate_imported12 <0.109 (p70) | 141.61 | 0.76 | 12.11 | 0.06 | 6.175E-09 |
| 347 | den_road <11.013 (p51) &build_area_pp >69.326 (p52)                                                                                 | rate_imported12 <0.003 (p36) | 33.41  | 0.56 | 12.06 | 0.13 | 1.485E-05 |
| 348 | prop_agricultural >0.063 (p82)                                                                                                      | rate_imported12 <0.003 (p36) | 25.53  | 0.68 | 11.96 | 0.32 | 4.34E-06  |
| 349 | prop_industrial >0.011 (p73)                                                                                                        | rate_imported12 <0.094 (p68) | 50.94  | 0.86 | 11.87 | 0.20 | 2.928E-05 |
| 350 | build_area_pp >66.697 (p52) &POI_den_mall_mkt <61.230 (p54) (not written in paper, same as asso betweeb build_area_pp and imp rate) | rate_imported12 <0.003 (p36) | 33.82  | 0.55 | 11.65 | 0.15 | 5.53E-05  |
| 351 | med_income <18250.903 (p61) &med_area_home >16.121 (p47)                                                                            | rate_imported12 <0.004 (p36) | 25.01  | 0.66 | 11.34 | 0.22 | 3.282E-05 |
| 352 | den_population <845.965 (p14)                                                                                                       | rate_imported12 <0.004 (p36) | 22.46  | 0.70 | 10.97 | 0.34 | 1.138E-05 |
| 353 | build_area_pp >69.988 (p53) &POI_den_sports <258.226 (p58) (not written in paper, same as asso betweeb build_area_pp and imp rate)  | rate_imported12 <0.002 (p36) | 32.91  | 0.54 | 10.89 | 0.14 | 6.918E-05 |
| 354 | prop_publicResid <0.010 (p60) &prop_industrial >0.010 (p71)                                                                         | rate_imported12 <0.001 (p36) | 22.60  | 0.69 | 10.75 | 0.25 | 4.576E-05 |
| 355 | prop_over65 >0.211 (p89)                                                                                                            | rate_imported12 <0.003 (p36) | 19.08  | 0.74 | 9.85  | 0.38 | 2.904E-07 |
| 356 | prop_higher_edu <0.128 (p17)                                                                                                        | rate_imported12 <0.101 (p68) | 34.11  | 0.94 | 9.57  | 0.26 | 2.367E-05 |
| 357 | prop_open_recreation <0.002 (p11)                                                                                                   | rate_imported12 <0.001 (p36) | 17.71  | 0.74 | 9.05  | 0.38 | 2.37E-05  |
| 358 | prop_rural_set >0.069 (p80)                                                                                                         | rate_imported12 <0.004 (p36) | 24.92  | 0.53 | 7.90  | 0.17 | 4.173E-05 |



**(h) Rules for wave-2 local case rate; POI density was used**

| No. | Antecedent                                                                                  | Consequent               | Supp   | Conf   | Lev    | Imp    | P         |
|-----|---------------------------------------------------------------------------------------------|--------------------------|--------|--------|--------|--------|-----------|
| 1   | med_income <24194.445 (p79) &prop_transport >0.091 (p39)                                    | rate_local3 >0.362 (p56) | 64.751 | 0.6623 | 21.946 | 0.1318 | 4.207E-06 |
| 2   | med_income <24895.467 (p79) &den_road >8.294 (p39)                                          | rate_local3 >0.352 (p56) | 65.657 | 0.6666 | 21.657 | 0.1402 | 4.314E-06 |
| 3   | med_income <24593.452 (p79) &prop_shrubland <0.112 (p58)                                    | rate_local3 >0.378 (p57) | 62.268 | 0.6421 | 21.384 | 0.1206 | 1.366E-05 |
| 4   | med_area_home <20.213 (p67) &prop_shrubland <0.112 (p58)                                    | rate_local3 >0.378 (p57) | 59.254 | 0.6548 | 21.102 | 0.1217 | 5.976E-05 |
| 5   | med_area_home <19.021 (p58) &prop_transport >0.091 (p39)                                    | rate_local3 >0.362 (p56) | 61.609 | 0.6619 | 20.86  | 0.1001 | 1.236E-05 |
| 6   | med_income <17558.932 (p56) &den_population >15540.769 (p47)                                | rate_local3 >0.327 (p52) | 56.807 | 0.7467 | 20.769 | 0.13   | 2.117E-06 |
| 7   | med_income <25034.670 (p81) &den_bldg >0.115 (p37)                                          | rate_local3 >0.370 (p57) | 65.332 | 0.6254 | 20.369 | 0.1203 | 6.365E-06 |
| 8   | prop_preprim_edu <0.128 (p82) &prop_higher_edu <0.223 (p58)<br>&med_area_home <19.043 (p59) | rate_local3 >0.279 (p48) | 57.502 | 0.8151 | 20.31  | 0.0944 | 6.116E-05 |
| 9   | prop_higher_edu <0.304 (p76) &prop_shrubland <0.112 (p58)                                   | rate_local3 >0.378 (p57) | 58.231 | 0.6463 | 20.247 | 0.1248 | 1.013E-05 |
| 10  | prop_preprim_edu <0.140 (p86) &prop_higher_edu <0.219 (p56)<br>&build_area_pp <71.407 (p53) | rate_local3 >0.280 (p48) | 55.81  | 0.8229 | 20.082 | 0.0554 | 6.571E-05 |
| 11  | med_income <27961.685 (p84) &prop_grassland <0.073 (p69)                                    | rate_local3 >0.270 (p47) | 82.884 | 0.7109 | 19.956 | 0.099  | 2.542E-05 |
| 12  | prop_higher_edu <0.219 (p56) &den_population >15540.769 (p47)                               | rate_local3 >0.338 (p54) | 50.087 | 0.7667 | 19.896 | 0.1873 | 5.951E-08 |
| 13  | med_area_home <19.087 (p60) &den_population >14945.078 (p46)                                | rate_local3 >0.326 (p52) | 64.397 | 0.6867 | 19.849 | 0.0883 | 2.724E-06 |
| 14  | prop_higher_edu <0.231 (p62) &prop_agricultural <0.025 (p71)                                | rate_local3 >0.340 (p54) | 58.412 | 0.6958 | 19.823 | 0.1248 | 2.188E-05 |
| 15  | med_area_home <18.689 (p57) &den_bldg >0.115 (p37)                                          | rate_local3 >0.370 (p57) | 59.54  | 0.6422 | 19.635 | 0.0886 | 4.586E-05 |
| 16  | prop_higher_edu <0.229 (p61) &prop_transport >0.106 (p45)                                   | rate_local3 >0.352 (p56) | 48.715 | 0.7463 | 19.582 | 0.1886 | 4.488E-06 |
| 17  | prop_preprim_edu <0.140 (p86) &med_income <17248.143 (p53)                                  | rate_local3 >0.270 (p47) | 69.41  | 0.7491 | 19.313 | 0.0757 | 3.697E-05 |
| 18  | prop_higher_edu <0.227 (p60) &build_area_pp <74.445 (p54)                                   | rate_local3 >0.328 (p52) | 57.58  | 0.711  | 19.271 | 0.1211 | 3.74E-05  |
| 19  | med_income <26769.030 (p83) &prop_agricultural <0.024 (p71)                                 | rate_local3 >0.333 (p53) | 73.688 | 0.6329 | 19.271 | 0.093  | 4.217E-05 |
| 20  | prop_higher_edu <0.242 (p63) &den_road >9.163 (p44)                                         | rate_local3 >0.356 (p56) | 48.912 | 0.7307 | 19.259 | 0.1855 | 6.003E-06 |
| 21  | prop_preprim_edu <0.141 (p86) &med_area_home <19.467 (p61)                                  | rate_local3 >0.242 (p41) | 87.62  | 0.7417 | 19.19  | 0.0482 | 9.598E-06 |
| 22  | med_area_home <18.950 (p58) &den_road >9.184 (p44)                                          | rate_local3 >0.344 (p55) | 58.876 | 0.6748 | 19.099 | 0.0958 | 5.323E-05 |
| 23  | prop_higher_edu <0.221 (p57) &med_area_home <15.911 (p47)                                   | rate_local3 >0.328 (p52) | 56.046 | 0.7159 | 19.005 | 0.0808 | 8.225E-05 |
| 24  | prop_higher_edu <0.231 (p62) &den_bldg >0.115 (p37)                                         | rate_local3 >0.372 (p57) | 51.084 | 0.6695 | 18.466 | 0.1356 | 4.1E-05   |

|           |                                                                                          |                          |        |        |        |        |           |
|-----------|------------------------------------------------------------------------------------------|--------------------------|--------|--------|--------|--------|-----------|
| <b>25</b> | prop_over65 >0.124 (p21) &prop_preprim_edu <0.140 (p86)<br>&prop_higher_edu <0.246 (p64) | rate_local3 >0.229 (p39) | 72.878 | 0.7954 | 18.166 | 0.0486 | 5.972E-06 |
| <b>26</b> | med_income <17170.044 (p53) &prop_open_recreation >0.028 (p47)                           | rate_local3 >0.337 (p54) | 49.771 | 0.7223 | 17.823 | 0.107  | 3.635E-05 |
| <b>27</b> | prop_higher_edu <0.227 (p60) &prop_grassland <0.073 (p69)                                | rate_local3 >0.292 (p50) | 57.962 | 0.7368 | 17.671 | 0.117  | 8.038E-05 |
| <b>28</b> | med_income <16632.840 (p51)                                                              | rate_local3 >0.341 (p54) | 67.301 | 0.6193 | 17.407 | 0.1602 | 6.932E-07 |
| <b>29</b> | prop_higher_edu <0.231 (p62) &prop_open_recreation >0.026 (p45)                          | rate_local3 >0.340 (p54) | 49.912 | 0.7045 | 17.347 | 0.1335 | 4.437E-05 |
| <b>30</b> | med_area_home <18.551 (p56) &prop_grassland <0.080 (p70)                                 | rate_local3 >0.256 (p44) | 70.587 | 0.7372 | 17.007 | 0.0631 | 7.149E-05 |
| <b>31</b> | prop_higher_edu <0.212 (p54) &prop_gov_insti_faci >0.027 (p38)                           | rate_local3 >0.328 (p52) | 49.115 | 0.7194 | 16.839 | 0.127  | 8.199E-05 |
| <b>32</b> | med_income <28352.730 (p84) &prop_gov_insti_faci >0.026 (p38)                            | rate_local3 >0.190 (p35) | 88.713 | 0.8063 | 16.743 | 0.0895 | 7.1E-05   |
| <b>33</b> | prop_preprim_edu <0.140 (p86) &prop_higher_edu <0.219 (p56)                              | rate_local3 >0.243 (p41) | 70.409 | 0.755  | 16.532 | 0.0839 | 1.199E-05 |
| <b>34</b> | med_income <25832.400 (p81) &prop_woodland <0.072 (p38)                                  | rate_local3 >0.348 (p55) | 46.924 | 0.6948 | 16.412 | 0.0991 | 5.782E-05 |
| <b>35</b> | med_area_home <16.859 (p50) &build_area_pp <71.501 (p53)                                 | rate_local3 >0.184 (p33) | 71.528 | 0.8563 | 16.24  | 0.0717 | 4.852E-05 |
| <b>36</b> | prop_over65 >0.140 (p35) &prop_shrubland <0.217 (p82)                                    | rate_local3 >0.278 (p47) | 79.936 | 0.6626 | 16.127 | 0.0581 | 7.125E-05 |
| <b>37</b> | med_area_home <19.087 (p60) &prop_gov_insti_faci >0.027 (p38)                            | rate_local3 >0.163 (p29) | 83.121 | 0.8575 | 16.111 | 0.0707 | 8.061E-05 |
| <b>38</b> | med_area_home <13.764 (p26)                                                              | rate_local3 >0.352 (p56) | 41.012 | 0.7346 | 16.09  | 0.2882 | 1.106E-07 |
| <b>39</b> | med_area_home <18.923 (p57) &prop_woodland <0.076 (p40)                                  | rate_local3 >0.372 (p57) | 39.567 | 0.7029 | 15.477 | 0.1343 | 6.807E-05 |
| <b>40</b> | med_income <21114.095 (p74) &POI_den__densports >351.476<br>(p64)                        | rate_local3 >0.441 (p64) | 36.084 | 0.6332 | 15.38  | 0.1697 | 4.439E-05 |
| <b>41</b> | ave_household_size <2.986 (p63) &prop_transport >0.091 (p39)                             | rate_local3 >0.362 (p56) | 53.192 | 0.6134 | 15.226 | 0.0829 | 7.519E-05 |
| <b>42</b> | prop_over65 >0.120 (p19) &prop_higher_edu <0.236 (p62)<br>&prop_transport >0.122 (p50)   | rate_local3 >0.226 (p38) | 48.001 | 0.8768 | 15.111 | 0.0361 | 5.101E-05 |
| <b>43</b> | prop_preprim_edu >0.092 (p41) &den_population >15540.769 (p47)                           | rate_local3 >0.333 (p53) | 45.161 | 0.7004 | 15.019 | 0.1166 | 7.33E-06  |
| <b>44</b> | med_income <21058.780 (p74) &POI_den_dentelecom_elec<br>>243.501 (p65)                   | rate_local3 >0.437 (p64) | 34.165 | 0.6507 | 14.909 | 0.1791 | 7.416E-05 |
| <b>45</b> | prop_over65 >0.124 (p21) &prop_higher_edu <0.246 (p64)<br>&den_road >9.607 (p45)         | rate_local3 >0.229 (p39) | 49.122 | 0.8559 | 14.85  | 0.041  | 7.417E-05 |
| <b>46</b> | med_income <20623.735 (p73) &POI_den_dentransport >589.870<br>(p65)                      | rate_local3 >0.444 (p64) | 33.822 | 0.6423 | 14.827 | 0.177  | 5.501E-05 |

|    |                                                                                                   |                          |        |        |        |        |           |
|----|---------------------------------------------------------------------------------------------------|--------------------------|--------|--------|--------|--------|-----------|
| 47 | med_income <21114.095 (p74) &POI_den_denmall_mkt >146.926 (p67)                                   | rate_local3 >0.441 (p64) | 32.37  | 0.6645 | 14.672 | 0.1833 | 2.13E-05  |
| 48 | build_area_pp <61.539 (p50)                                                                       | rate_local3 >0.221 (p38) | 75.937 | 0.7511 | 14.461 | 0.143  | 6.155E-06 |
| 49 | prop_over65 >0.146 (p38) &prop_preprim_edu <0.126 (p81)                                           | rate_local3 >0.236 (p40) | 71.708 | 0.7342 | 14.401 | 0.0797 | 2.827E-05 |
| 50 | med_income <21058.780 (p74) &POI_den_denedu >198.459 (p63)                                        | rate_local3 >0.476 (p66) | 33.942 | 0.5714 | 14.261 | 0.1457 | 5.81E-05  |
| 51 | prop_higher_edu <0.231 (p62)                                                                      | rate_local3 >0.340 (p54) | 73.108 | 0.5707 | 14.226 | 0.1111 | 1.139E-05 |
| 52 | den_population >22716.207 (p54)                                                                   | rate_local3 >0.265 (p47) | 67.208 | 0.6915 | 13.987 | 0.1439 | 2.766E-05 |
| 53 | prop_transport >0.142 (p55)                                                                       | rate_local3 >0.378 (p57) | 54.732 | 0.5656 | 13.906 | 0.1437 | 4.175E-05 |
| 54 | prop_higher_edu <0.243 (p63) &prop_shrubland <0.184 (p78) &POI_den_densports >338.260 (p64)       | rate_local3 >0.379 (p57) | 29.293 | 0.7881 | 13.651 | 0.0607 | 3.135E-05 |
| 55 | prop_higher_edu <0.247 (p64) &den_public_trans >18.752 (p53)                                      | rate_local3 >0.410 (p59) | 38.55  | 0.5997 | 13.309 | 0.1175 | 7.118E-05 |
| 56 | ave_household_size <2.666 (p29) &den_population >15287.373 (p47)                                  | rate_local3 >0.424 (p63) | 28.82  | 0.6969 | 13.133 | 0.1758 | 6.917E-05 |
| 57 | prop_preprim_edu >0.092 (p41) &den_road >9.987 (p47)                                              | rate_local3 >0.333 (p53) | 41.762 | 0.6812 | 13.103 | 0.1298 | 5.529E-05 |
| 58 | prop_higher_edu <0.312 (p77) &POI_den_denmall_mkt >184.953 (p69)                                  | rate_local3 >0.406 (p59) | 28.335 | 0.726  | 12.863 | 0.1983 | 6.937E-05 |
| 59 | ave_household_size <2.639 (p29) &prop_rural_set <0.001 (p46)                                      | rate_local3 >0.493 (p68) | 25.062 | 0.6449 | 12.809 | 0.164  | 5.449E-05 |
| 60 | prop_higher_edu <0.243 (p63) &POI_den_densports >338.260 (p64)                                    | rate_local3 >0.379 (p57) | 29.898 | 0.7275 | 12.602 | 0.2101 | 4.547E-05 |
| 61 | prop_shrubland <0.100 (p56)                                                                       | rate_local3 >0.420 (p61) | 58.694 | 0.4877 | 12.546 | 0.1042 | 7.135E-05 |
| 62 | prop_higher_edu <0.241 (p63) &POI_den_dentransport >517.252 (p64)                                 | rate_local3 >0.376 (p57) | 30.219 | 0.7204 | 12.44  | 0.1985 | 4.547E-05 |
| 63 | ave_household_size <2.632 (p29) &den_road >10.043 (p47)                                           | rate_local3 >0.451 (p64) | 27.119 | 0.6507 | 12.379 | 0.1398 | 5.595E-05 |
| 64 | prop_publicResid >0.086 (p79)                                                                     | rate_local3 >0.297 (p50) | 35.12  | 0.7799 | 12.359 | 0.2744 | 7.805E-06 |
| 65 | POI_den__mall_mkt >307.693 (p78)                                                                  | rate_local3 >0.547 (p72) | 24.39  | 0.53   | 12.21  | 0.26   | 5.239E-06 |
| 66 | ave_household_size <2.654 (p29) &den_bldg >0.166 (p48)                                            | rate_local3 >0.437 (p64) | 28.373 | 0.6379 | 12.058 | 0.1254 | 7.177E-05 |
| 67 | prop_higher_edu <0.331 (p79) &prop_shrubland <0.158 (p72) &POI_den_dentelecom_elec >577.491 (p80) | rate_local3 >0.384 (p57) | 23.54  | 0.849  | 11.979 | 0.0438 | 2.269E-05 |
| 68 | prop_preprim_edu <0.141 (p86) &ave_household_size <2.654 (p29)                                    | rate_local3 >0.437 (p64) | 30.61  | 0.6026 | 11.976 | 0.09   | 6.777E-05 |
| 69 | POI_den__sports >882.075 (p78)                                                                    | rate_local3 >0.528 (p71) | 24.72  | 0.55   | 11.96  | 0.26   | 4.033E-06 |
| 70 | POI_den__telecom_elec >540.287 (p78)                                                              | rate_local3 >0.539 (p71) | 24.30  | 0.53   | 11.95  | 0.26   | 2.434E-06 |

|           |                                                                                                     |                          |        |        |        |        |           |
|-----------|-----------------------------------------------------------------------------------------------------|--------------------------|--------|--------|--------|--------|-----------|
| <b>71</b> | prop_higher_edu <0.301 (p76) &prop_woodland <0.142 (p56)<br>&POI_den_denmall_mkt >307.589 (p78)     | rate_local3 >0.376 (p57) | 22.661 | 0.8891 | 11.859 | 0.0676 | 4.499E-05 |
| <b>72</b> | prop_woodland <0.076 (p40)                                                                          | rate_local3 >0.403 (p59) | 45.867 | 0.5375 | 11.798 | 0.1383 | 3.989E-05 |
| <b>73</b> | prop_higher_edu <0.331 (p79) &prop_woodland <0.198 (p65)<br>&POI_den_dentelecom_elec >577.491 (p80) | rate_local3 >0.384 (p57) | 22.916 | 0.854  | 11.727 | 0.0488 | 2.269E-05 |
| <b>74</b> | POI_den__transport >1382.534 (p79)                                                                  | rate_local3 >0.530 (p71) | 24.57  | 0.54   | 11.70  | 0.26   | 1.176E-05 |
| <b>75</b> | med_income <18952.447 (p62) &prop_industrial <0.008 (p69)<br>&POI_den_dentransport >1251.423 (p77)  | rate_local3 >0.405 (p59) | 21.379 | 0.8708 | 11.618 | 0.1091 | 7.391E-05 |
| <b>76</b> | prop_higher_edu <0.239 (p63) &prop_shrubland <0.176 (p77)<br>&POI_den_denedu >293.660 (p70)         | rate_local3 >0.386 (p57) | 22.678 | 0.8509 | 11.553 | 0.0642 | 5.989E-05 |
| <b>77</b> | prop_higher_edu <0.333 (p79) &prop_woodland <0.198 (p65)<br>&POI_den_dentransport >1420.849 (p79)   | rate_local3 >0.384 (p57) | 23.389 | 0.8206 | 11.505 | 0.0452 | 6.691E-05 |
| <b>78</b> | den_road >9.163 (p44)                                                                               | rate_local3 >0.407 (p59) | 59.287 | 0.4876 | 11.241 | 0.0924 | 3.309E-05 |
| <b>79</b> | prop_higher_edu <0.239 (p63) &POI_den_denedu >293.660 (p70)                                         | rate_local3 >0.380 (p57) | 23.313 | 0.8068 | 11.171 | 0.2879 | 5.411E-05 |
| <b>80</b> | ave_household_size <2.629 (p29) &prop_gov_insti_faci >0.025 (p36)                                   | rate_local3 >0.426 (p63) | 25.038 | 0.678  | 11.114 | 0.1474 | 6.054E-06 |
| <b>81</b> | prop_grassland <0.000 (p15)                                                                         | rate_local3 >0.498 (p68) | 21.316 | 0.6383 | 10.941 | 0.3276 | 1.079E-05 |
| <b>82</b> | POI_den__edu >611.274 (p81)                                                                         | rate_local3 >0.558 (p74) | 21.47  | 0.51   | 10.87  | 0.26   | 2.039E-05 |
| <b>83</b> | prop_higher_edu <0.245 (p64) &prop_private_resid >0.098 (p66)<br>&prop_grassland <0.061 (p64)       | rate_local3 >0.371 (p57) | 22.095 | 0.8364 | 10.76  | 0.0468 | 6.369E-05 |
| <b>84</b> | prop_over65 >0.140 (p35)                                                                            | rate_local3 >0.278 (p47) | 85.505 | 0.6045 | 10.69  | 0.0756 | 7.794E-05 |
| <b>85</b> | med_area_home <20.975 (p73) &POI_den_dentelecom_elec<br>>683.674 (p83)                              | rate_local3 >0.345 (p55) | 23.236 | 0.8174 | 10.32  | 0.1267 | 8.115E-05 |
| <b>86</b> | prop_higher_edu <0.245 (p64) &den_bldg >0.222 (p60)<br>&prop_private_resid >0.098 (p66)             | rate_local3 >0.371 (p57) | 19.5   | 0.8835 | 10.029 | 0.0939 | 4.221E-05 |
| <b>87</b> | ave_household_size <2.766 (p37) &prop_publicResid >0.047 (p71)                                      | rate_local3 >0.410 (p59) | 18.842 | 0.8082 | 9.6904 | 0.2521 | 4.405E-05 |
| <b>88</b> | ave_household_size <2.587 (p17)                                                                     | rate_local3 >0.610 (p79) | 19.369 | 0.4304 | 9.5905 | 0.2131 | 2.656E-05 |
| <b>89</b> | prop_preprim_edu >0.093 (p43) &prop_grassland <0.052 (p62)                                          | rate_local3 >0.247 (p42) | 48.762 | 0.7103 | 9.4833 | 0.0818 | 7.965E-05 |
| <b>90</b> | prop_higher_edu <0.221 (p57) &prop_private_resid >0.117 (p70)                                       | rate_local3 >0.374 (p57) | 16.71  | 0.9523 | 9.2353 | 0.4128 | 6.486E-05 |
| <b>91</b> | den_bldg >0.414 (p83)                                                                               | rate_local3 >0.518 (p71) | 20.018 | 0.5331 | 9.0521 | 0.2411 | 4.192E-05 |
| <b>92</b> | prop_business >0.037 (p83)                                                                          | rate_local3 >0.510 (p71) | 20.041 | 0.5433 | 8.9966 | 0.2439 | 2.061E-05 |
| <b>93</b> | prop_higher_edu <0.208 (p52) &POI_den_dentelecom_elec >359.967<br>(p71)                             | rate_local3 >0.376 (p57) | 17.272 | 0.8841 | 8.9912 | 0.3308 | 8.324E-05 |

|            |                                                                                                     |                                   |        |        |        |        |           |
|------------|-----------------------------------------------------------------------------------------------------|-----------------------------------|--------|--------|--------|--------|-----------|
| <b>94</b>  | gender_ratio <86.703 (p11)                                                                          | rate_local3 >0.610 (p79)          | 11.686 | 0.5118 | 6.8158 | 0.2985 | 7.161E-05 |
| <b>95</b>  | den_public_trans >89.817 (p91)                                                                      | rate_local3 >0.515 (p71)          | 12.632 | 0.6389 | 6.7963 | 0.3438 | 7.157E-05 |
| <b>96</b>  | den_population >16512.251 (p49) &POI_den_dentelecom_elec <179.880 (p60)                             | rate_local3 =0.289-0.529 (p50-71) | 19.684 | 0.4457 | 9.1098 | 0.1495 | 4.236E-05 |
| <b>97</b>  | den_population >16512.251 (p49) &POI_den_denedu <220.422 (p64)                                      | rate_local3 =0.289-0.529 (p50-71) | 20.008 | 0.4123 | 8.3889 | 0.128  | 3.501E-05 |
| <b>98</b>  | prop_publicResid <0.078 (p77) &prop_business <0.050 (p86) &prop_industrial <0.004 (p60)             | rate_local3 <0.359 (p56)          | 63.65  | 0.8362 | 21.049 | 0.121  | 2.425E-05 |
| <b>99</b>  | prop_publicResid <0.027 (p66) &POI_den_denmall_mkt <335.783 (p79)                                   | rate_local3 <0.338 (p54)          | 80.313 | 0.7252 | 20.329 | 0.0893 | 2.637E-05 |
| <b>100</b> | prop_publicResid <0.082 (p79) &prop_industrial <0.003 (p58) &POI_den_dentransport <1307.010 (p77)   | rate_local3 <0.376 (p57)          | 59.258 | 0.872  | 20.148 | 0.1131 | 2.347E-06 |
| <b>101</b> | prop_publicResid <0.096 (p81) &prop_industrial <0.003 (p57) &POI_den_denmall_mkt <321.686 (p79)     | rate_local3 <0.380 (p57)          | 60.133 | 0.8696 | 20.113 | 0.1103 | 3.695E-06 |
| <b>102</b> | prop_publicResid <0.076 (p77) &prop_industrial <0.003 (p58) &POI_den_dentelecom_elec <540.287 (p78) | rate_local3 <0.377 (p57)          | 59.001 | 0.8732 | 20.098 | 0.1137 | 3.134E-06 |
| <b>103</b> | prop_publicResid <0.025 (p66) &prop_transport <0.214 (p67)                                          | rate_local3 <0.368 (p57)          | 74.76  | 0.7745 | 20.01  | 0.1152 | 1.42E-05  |
| <b>104</b> | prop_publicResid <0.027 (p66) &POI_den_dentelecom_elec <499.985 (p78)                               | rate_local3 <0.348 (p55)          | 79.512 | 0.7339 | 19.935 | 0.0898 | 2.517E-05 |
| <b>105</b> | prop_publicResid <0.027 (p66) &POI_den_densports <958.264 (p81)                                     | rate_local3 <0.338 (p54)          | 80.368 | 0.7197 | 19.885 | 0.0838 | 1.178E-05 |
| <b>106</b> | prop_publicResid <0.076 (p77) &prop_industrial <0.003 (p59) &POI_den_densports <938.704 (p79)       | rate_local3 <0.362 (p56)          | 59.586 | 0.8429 | 19.864 | 0.114  | 5.506E-05 |
| <b>107</b> | den_public_trans <63.592 (p84) &prop_publicResid <0.078 (p77) &prop_industrial <0.003 (p58)         | rate_local3 <0.379 (p57)          | 62.586 | 0.8457 | 19.835 | 0.1098 | 2.006E-06 |
| <b>108</b> | med_area_home >14.812 (p39) &prop_business <0.048 (p86) &prop_industrial <0.003 (p58)               | rate_local3 <0.371 (p57)          | 57.102 | 0.8741 | 19.812 | 0.1032 | 4.923E-06 |
| <b>109</b> | prop_publicResid <0.091 (p80) &prop_industrial <0.003 (p58) &prop_transport <0.252 (p74)            | rate_local3 <0.377 (p57)          | 59.365 | 0.8578 | 19.513 | 0.13   | 2.977E-06 |
| <b>110</b> | prop_publicResid <0.027 (p66) &POI_den_dentransport <1286.158 (p77)                                 | rate_local3 <0.338 (p54)          | 77.575 | 0.7219 | 19.37  | 0.086  | 5.139E-05 |
| <b>111</b> | prop_publicResid <0.027 (p66) &POI_den_denedu <650.564 (p81)                                        | rate_local3 <0.338 (p54)          | 80.476 | 0.7063 | 18.762 | 0.0704 | 7.714E-05 |
| <b>112</b> | med_area_home >14.812 (p39) &prop_industrial <0.003 (p58) &POI_den_dentelecom_elec <540.287 (p78)   | rate_local3 <0.371 (p57)          | 54.582 | 0.8665 | 18.625 | 0.0956 | 3.882E-05 |

|            |                                                                                              |                          |        |        |        |        |           |
|------------|----------------------------------------------------------------------------------------------|--------------------------|--------|--------|--------|--------|-----------|
| <b>113</b> | prop_publicResid <0.078 (p77) &prop_industrial <0.003 (p58) &POI_den_denedu <499.915 (p79)   | rate_local3 <0.379 (p57) | 57.499 | 0.8479 | 18.326 | 0.1037 | 9.271E-06 |
| <b>114</b> | med_area_home >15.209 (p44) &den_public_trans <59.341 (p83) &prop_industrial <0.003 (p58)    | rate_local3 <0.370 (p57) | 55.454 | 0.8462 | 18.118 | 0.0721 | 4.243E-05 |
| <b>115</b> | prop_publicResid <0.025 (p66) &prop_business <0.038 (p84)                                    | rate_local3 <0.408 (p59) | 84.856 | 0.7668 | 18.055 | 0.0818 | 3.678E-05 |
| <b>116</b> | den_population <36301.913 (p67) &prop_industrial <0.003 (p58)                                | rate_local3 <0.377 (p57) | 63.728 | 0.8027 | 18.018 | 0.1409 | 3.453E-06 |
| <b>117</b> | den_public_trans <47.515 (p78) &prop_publicResid <0.025 (p66)                                | rate_local3 <0.408 (p59) | 84.845 | 0.7664 | 18.012 | 0.0814 | 3.678E-05 |
| <b>118</b> | prop_publicResid <0.024 (p66) &prop_woodland >0.077 (p40)                                    | rate_local3 <0.374 (p57) | 64.31  | 0.7953 | 17.942 | 0.1277 | 2.094E-05 |
| <b>119</b> | prop_higher_edu >0.199 (p49) &prop_business <0.044 (p85)                                     | rate_local3 <0.375 (p57) | 66.554 | 0.7748 | 17.175 | 0.0846 | 5.406E-05 |
| <b>120</b> | prop_higher_edu >0.197 (p49) &prop_woodland >0.067 (p37)                                     | rate_local3 <0.399 (p58) | 56.449 | 0.8429 | 16.521 | 0.1376 | 1.936E-06 |
| <b>121</b> | prop_industrial <0.003 (p58) &POI_den_dentelecom_elec <540.287 (p78)                         | rate_local3 <0.377 (p57) | 67.511 | 0.7595 | 16.333 | 0.1232 | 5.593E-05 |
| <b>122</b> | prop_higher_edu >0.170 (p37) &prop_business <0.051 (p86) &prop_industrial <0.003 (p57)       | rate_local3 <0.410 (p59) | 57.42  | 0.8453 | 16.223 | 0.103  | 3.901E-05 |
| <b>123</b> | prop_industrial <0.003 (p58) &POI_den_dentransport <1307.010 (p77)                           | rate_local3 <0.376 (p57) | 67.135 | 0.7589 | 16.222 | 0.124  | 5.965E-05 |
| <b>124</b> | prop_higher_edu >0.225 (p59) &ave_household_size >2.579 (p17)                                | rate_local3 <0.321 (p52) | 54.23  | 0.7515 | 16.186 | 0.0766 | 5.451E-05 |
| <b>125</b> | build_area_pp >65.200 (p51) &prop_business <0.069 (p88) &prop_industrial <0.003 (p59)        | rate_local3 <0.376 (p57) | 43.03  | 0.9145 | 15.966 | 0.1292 | 1.063E-05 |
| <b>126</b> | prop_industrial <0.003 (p58) &POI_den_densports <741.357 (p78)                               | rate_local3 <0.376 (p57) | 65.763 | 0.7583 | 15.905 | 0.1224 | 8.074E-05 |
| <b>127</b> | med_area_home >19.743 (p65)                                                                  | rate_local3 <0.352 (p56) | 58.77  | 0.7604 | 15.899 | 0.2057 | 3.995E-07 |
| <b>128</b> | prop_publicResid <0.013 (p62) &prop_shrubland >0.047 (p43)                                   | rate_local3 <0.376 (p57) | 60.643 | 0.7787 | 15.887 | 0.1061 | 5.787E-05 |
| <b>129</b> | prop_industrial <0.003 (p58) &POI_den_denmall_mkt <294.792 (p78)                             | rate_local3 <0.377 (p57) | 65.554 | 0.752  | 15.361 | 0.1168 | 8.074E-05 |
| <b>130</b> | ave_household_size >2.657 (p29) &prop_industrial <0.003 (p58)                                | rate_local3 <0.376 (p57) | 62.382 | 0.7615 | 15.304 | 0.1294 | 7.073E-06 |
| <b>131</b> | med_income >22184.362 (p77)                                                                  | rate_local3 <0.341 (p54) | 43.895 | 0.8221 | 14.847 | 0.2781 | 2.542E-07 |
| <b>132</b> | ave_household_size >2.850 (p49) &prop_publicResid <0.095 (p81) &prop_industrial <0.003 (p58) | rate_local3 <0.336 (p53) | 43.015 | 0.8194 | 14.695 | 0.09   | 7.53E-05  |
| <b>133</b> | den_public_trans <32.922 (p67) &prop_industrial <0.003 (p58)                                 | rate_local3 <0.377 (p57) | 59.244 | 0.7654 | 14.678 | 0.1277 | 4.84E-05  |
| <b>134</b> | build_area_pp >61.539 (p50)                                                                  | rate_local3 <0.221 (p38) | 58.629 | 0.515  | 14.367 | 0.1262 | 6.155E-06 |
| <b>135</b> | den_population <22716.207 (p54)                                                              | rate_local3 <0.265 (p47) | 66.938 | 0.5745 | 14.356 | 0.1232 | 2.766E-05 |

|                                                                          |                          |        |        |        |        |           |
|--------------------------------------------------------------------------|--------------------------|--------|--------|--------|--------|-----------|
| <b>136</b> prop_gov_insti_faci <0.023 (p33)                              | rate_local3 <0.011 (p15) | 25.789 | 0.3578 | 14.338 | 0.1989 | 5.041E-09 |
| <b>137</b> prop_higher_edu >0.231 (p62)                                  | rate_local3 <0.340 (p54) | 60.577 | 0.7058 | 13.932 | 0.1623 | 1.139E-05 |
| <b>138</b> prop_transport <0.142 (p55)                                   | rate_local3 <0.378 (p57) | 81.392 | 0.695  | 13.789 | 0.1178 | 4.175E-05 |
| <b>139</b> prop_shrubland >0.100 (p56)                                   | rate_local3 <0.420 (p61) | 70.629 | 0.7522 | 12.762 | 0.1359 | 7.135E-05 |
| <b>140</b> prop_publicResid <0.086 (p79)                                 | rate_local3 <0.297 (p50) | 95.928 | 0.5684 | 12.553 | 0.0744 | 7.805E-06 |
| <b>141</b> prop_industrial <0.003 (p58) &POI_den_denedu <70.598 (p46)    | rate_local3 <0.380 (p57) | 38.606 | 0.8501 | 12.324 | 0.1834 | 3.615E-05 |
| <b>142</b> POI_den_denmall_mkt <307.693 (p78)                            | rate_local3 <0.547 (p72) | 135.67 | 0.8082 | 12.286 | 0.0732 | 5.239E-06 |
| <b>143</b> POI_den__telecom_elec <540.287 (p78)                          | rate_local3 <0.539 (p71) | 134.81 | 0.80   | 12.01  | 0.07   | 2.434E-06 |
| <b>144</b> POI_den__sports <882.075 (p78)                                | rate_local3 <0.528 (p71) | 133.09 | 0.79   | 11.89  | 0.07   | 4.033E-06 |
| <b>145</b> POI_den__transport <1382.534 (p79)                            | rate_local3 <0.530 (p71) | 132.54 | 0.79   | 11.58  | 0.07   | 1.176E-05 |
| <b>146</b> den_road <9.163 (p44)                                         | rate_local3 <0.407 (p59) | 67.18  | 0.7267 | 11.336 | 0.1226 | 3.309E-05 |
| <b>147</b> prop_open_recreation <0.099 (p78) &prop_woodland >0.173 (p62) | rate_local3 <0.508 (p70) | 64.928 | 0.8366 | 11.129 | 0.0321 | 3.972E-05 |
| <b>148</b> prop_open_recreation <0.016 (p36)                             | rate_local3 <0.013 (p15) | 22.835 | 0.3012 | 10.789 | 0.1423 | 1.963E-05 |
| <b>149</b> POI_den_denedu <611.274 (p81)                                 | rate_local3 <0.558 (p74) | 139.02 | 0.807  | 10.742 | 0.0624 | 2.039E-05 |
| <b>150</b> prop_woodland >0.312 (p81)                                    | rate_local3 <0.403 (p59) | 35.086 | 0.8626 | 10.684 | 0.2627 | 7.471E-06 |
| <b>151</b> prop_over65 <0.140 (p35)                                      | rate_local3 <0.278 (p47) | 44.728 | 0.6149 | 10.591 | 0.1456 | 7.794E-05 |
| <b>152</b> prop_private_resid <0.022 (p37)                               | rate_local3 <0.013 (p15) | 23     | 0.2924 | 10.502 | 0.1335 | 5.149E-05 |
| <b>153</b> ave_household_size >3.008 (p74)                               | rate_local3 <0.610 (p79) | 60.542 | 0.936  | 9.8406 | 0.1521 | 6.605E-05 |
| <b>154</b> den_bldg <0.414 (p83)                                         | rate_local3 <0.518 (p71) | 133.97 | 0.7577 | 8.7898 | 0.0497 | 4.192E-05 |
| <b>155</b> prop_business <0.037 (p83)                                    | rate_local3 <0.510 (p71) | 132.89 | 0.7501 | 8.7862 | 0.0496 | 2.061E-05 |
| <b>156</b> prop_industrial <0.003 (p57) &prop_agricultural >0.017 (p64)  | rate_local3 <0.486 (p67) | 31.377 | 0.9309 | 8.4727 | 0.1713 | 4.243E-05 |
| <b>157</b> prop_preprim_edu >0.146 (p89)                                 | rate_local3 <0.021 (p15) | 11.836 | 0.523  | 8.2401 | 0.3641 | 4.683E-07 |
| <b>158</b> prop_household_3gen >0.058 (p84)                              | rate_local3 <0.013 (p15) | 13.594 | 0.3959 | 8.1391 | 0.2371 | 1.984E-05 |
| <b>159</b> prop_private_resid >0.104 (p66) &prop_transport <0.221 (p68)  | rate_local3 <0.284 (p49) | 22.581 | 0.7428 | 7.9125 | 0.194  | 7.598E-05 |
| <b>160</b> den_public_trans <89.817 (p91)                                | rate_local3 <0.515 (p71) | 143.72 | 0.7394 | 6.7434 | 0.0347 | 7.157E-05 |

(i) Rules for wave-3 local case rate; POI density was used

| No. | Antecedent                                                                                      | Consequent               | Supp  | Conf | Lev   | Imp  | P         |
|-----|-------------------------------------------------------------------------------------------------|--------------------------|-------|------|-------|------|-----------|
| 1   | med_income <23455.645 (p78) &den_road >8.039 (p38)<br>&LU_entropy <0.548 (p48)                  | rate_local4 >0.788 (p77) | 31.38 | 0.77 | 21.68 | 0.20 | 2.075E-06 |
| 2   | med_income <23474.184 (p78) &prop_grassland <0.022 (p47)<br>&LU_entropy <0.554 (p50)            | rate_local4 >0.796 (p77) | 31.02 | 0.76 | 21.50 | 0.19 | 3.727E-06 |
| 3   | den_population >18592.692 (p50) &prop_agricultural <0.010 (p59)<br>&prop_shrubland <0.097 (p55) | rate_local4 >0.466 (p46) | 60.83 | 0.81 | 21.48 | 0.05 | 8.88E-06  |
| 4   | med_income <23183.658 (p78) &prop_transport >0.087 (p38)<br>&LU_entropy <0.547 (p47)            | rate_local4 >0.817 (p78) | 30.05 | 0.78 | 21.45 | 0.20 | 1.32E-05  |
| 5   | med_income <23814.728 (p79) &prop_shrubland <0.020 (p36)<br>&LU_entropy <0.553 (p49)            | rate_local4 >0.787 (p77) | 30.18 | 0.79 | 21.01 | 0.18 | 2.951E-06 |
| 6   | prop_over65 >0.109 (p11) &prop_transport >0.142 (p55)<br>&prop_agricultural <0.012 (p60)        | rate_local4 >0.431 (p43) | 63.92 | 0.84 | 21.01 | 0.05 | 1.296E-05 |
| 7   | med_income <23474.184 (p78) &prop_agricultural <0.010 (p59)<br>&LU_entropy <0.554 (p50)         | rate_local4 >0.792 (p77) | 32.26 | 0.68 | 21.00 | 0.18 | 2.647E-06 |
| 8   | med_income <23474.184 (p78) &prop_woodland <0.028 (p29)<br>&LU_entropy <0.554 (p50)             | rate_local4 >0.817 (p78) | 29.45 | 0.78 | 20.96 | 0.12 | 1.17E-05  |
| 9   | prop_transport >0.128 (p52) &LU_entropy <0.547 (p47)                                            | rate_local4 >0.789 (p77) | 33.42 | 0.64 | 20.86 | 0.25 | 2.149E-08 |
| 10  | den_population >18592.692 (p50) &den_road >10.356 (p49)<br>&prop_agricultural <0.010 (p59)      | rate_local4 >0.466 (p46) | 61.21 | 0.79 | 20.82 | 0.05 | 3.644E-06 |
| 11  | med_income <22034.302 (p77) &den_bldg >0.134 (p42)<br>&LU_entropy <0.547 (p47)                  | rate_local4 >0.806 (p78) | 29.56 | 0.77 | 20.78 | 0.21 | 2.809E-05 |
| 12  | med_income <24553.043 (p79) &LU_entropy <0.548 (p47)<br>&POI_den_telecom_elec >223.612 (p65)    | rate_local4 >0.811 (p78) | 29.89 | 0.74 | 20.74 | 0.18 | 1.844E-05 |
| 13  | den_population >17099.042 (p50) &prop_rural_set <0.039 (p71)<br>&prop_shrubland <0.097 (p55)    | rate_local4 >0.466 (p46) | 59.77 | 0.80 | 20.74 | 0.05 | 3.983E-06 |
| 14  | prop_grassland <0.017 (p43) &LU_entropy <0.547 (p47)                                            | rate_local4 >0.803 (p78) | 33.11 | 0.61 | 20.56 | 0.20 | 3.356E-07 |
| 15  | prop_higher_edu <0.363 (p85) &den_road >8.189 (p38)<br>&LU_entropy <0.548 (p48)                 | rate_local4 >0.808 (p78) | 30.14 | 0.71 | 20.41 | 0.14 | 5.557E-06 |
| 16  | med_income <22534.375 (p78) &LU_entropy <0.549 (p48)<br>&POI_den_sports >368.773 (p64)          | rate_local4 >0.821 (p79) | 28.85 | 0.76 | 20.39 | 0.19 | 5.263E-05 |
| 17  | den_road >9.940 (p47) &LU_entropy <0.548 (p48)                                                  | rate_local4 >0.788 (p77) | 34.15 | 0.59 | 20.36 | 0.21 | 1.063E-07 |
| 18  | med_income <23794.776 (p79) &prop_agricultural <0.017 (p64)<br>&prop_shrubland <0.118 (p60)     | rate_local4 >0.442 (p43) | 61.86 | 0.82 | 20.34 | 0.09 | 6.161E-05 |



|    |                                                                                          |                          |       |      |       |      |           |
|----|------------------------------------------------------------------------------------------|--------------------------|-------|------|-------|------|-----------|
| 19 | med_income <27018.204 (p84) &prop_rural_set <0.024 (p65) &prop_shrubland <0.118 (p60)    | rate_local4 >0.443 (p43) | 58.54 | 0.84 | 20.32 | 0.09 | 3.687E-05 |
| 20 | med_income <24553.043 (p79) &POI_den_mall_mkt >163.832 (p69)                             | rate_local4 >0.788 (p77) | 32.02 | 0.65 | 20.24 | 0.14 | 4.493E-05 |
| 21 | med_income <21397.583 (p75) &prop_rural_set <0.002 (p49) &LU_entropy <0.549 (p48)        | rate_local4 >0.791 (p77) | 29.43 | 0.76 | 20.21 | 0.21 | 1.275E-05 |
| 22 | den_bldg >0.162 (p47) &LU_entropy <0.546 (p47)                                           | rate_local4 >0.786 (p77) | 34.07 | 0.59 | 20.17 | 0.21 | 6.677E-08 |
| 23 | ave_household_size <2.934 (p63) &prop_agricultural <0.010 (p59) &LU_entropy <0.558 (p50) | rate_local4 >0.824 (p79) | 31.12 | 0.62 | 20.12 | 0.13 | 3.923E-05 |
| 24 | med_area_home <18.625 (p56) &prop_grassland <0.018 (p45) &LU_entropy <0.550 (p49)        | rate_local4 >0.807 (p78) | 27.81 | 0.82 | 20.10 | 0.23 | 5.435E-06 |
| 25 | prop_rural_set <0.024 (p65) &prop_shrubland <0.110 (p58)                                 | rate_local4 >0.548 (p58) | 59.45 | 0.66 | 20.09 | 0.10 | 1.347E-05 |
| 26 | med_area_home <19.189 (p61) &den_road >8.189 (p38) &LU_entropy <0.548 (p48)              | rate_local4 >0.808 (p78) | 28.67 | 0.76 | 20.06 | 0.19 | 2.302E-05 |
| 27 | prop_shrubland <0.021 (p37) &LU_entropy <0.543 (p46)                                     | rate_local4 >0.787 (p77) | 32.28 | 0.63 | 20.02 | 0.19 | 6.655E-08 |
| 28 | med_income <24602.040 (p79) &POI_den_transport >860.459 (p70)                            | rate_local4 >0.783 (p76) | 31.15 | 0.68 | 19.98 | 0.13 | 4.866E-05 |
| 29 | med_income <24606.472 (p79) &POI_den_telecom_elec >297.186 (p68)                         | rate_local4 >0.792 (p77) | 31.64 | 0.64 | 19.95 | 0.14 | 4.316E-05 |
| 30 | med_income <28797.450 (p84) &prop_grassland <0.005 (p29)                                 | rate_local4 >0.823 (p79) | 29.69 | 0.67 | 19.94 | 0.14 | 7.623E-05 |
| 31 | ave_household_size <2.934 (p63) &prop_grassland <0.009 (p34) &LU_entropy <0.558 (p50)    | rate_local4 >0.824 (p79) | 28.39 | 0.74 | 19.93 | 0.14 | 6.342E-05 |
| 32 | prop_rural_set <0.002 (p49) &LU_entropy <0.549 (p48)                                     | rate_local4 >0.791 (p77) | 35.32 | 0.55 | 19.91 | 0.17 | 3.676E-07 |
| 33 | den_population >18592.692 (p50) &prop_shrubland <0.097 (p55)                             | rate_local4 >0.526 (p56) | 58.58 | 0.69 | 19.91 | 0.09 | 2.575E-05 |
| 34 | med_income <23474.184 (p78) &prop_woodland <0.015 (p24)                                  | rate_local4 >0.817 (p78) | 29.11 | 0.71 | 19.91 | 0.13 | 3.975E-05 |
| 35 | med_income <23243.595 (p78) &POI_den_sports >464.930 (p68)                               | rate_local4 >0.804 (p78) | 31.32 | 0.63 | 19.90 | 0.14 | 5.095E-05 |
| 36 | med_income <23878.187 (p79) &LU_entropy <0.551 (p49) &POI_den_edu >204.703 (p63)         | rate_local4 >0.822 (p79) | 28.56 | 0.73 | 19.87 | 0.18 | 1.417E-05 |
| 37 | den_population >20156.904 (p52) &den_bldg >0.213 (p59)                                   | rate_local4 >0.525 (p55) | 51.35 | 0.75 | 19.81 | 0.08 | 2.44E-05  |
| 38 | med_income <23474.184 (p78) &den_public_trans >16.405 (p50) &LU_entropy <0.555 (p50)     | rate_local4 >0.817 (p78) | 29.02 | 0.70 | 19.79 | 0.15 | 5.972E-05 |
| 39 | med_income <27485.399 (p84) &prop_transport >0.077 (p36) &prop_agricultural <0.012 (p60) | rate_local4 >0.394 (p39) | 70.68 | 0.84 | 19.73 | 0.06 | 4.522E-05 |

|    |                                                                                              |                          |       |      |       |      |           |
|----|----------------------------------------------------------------------------------------------|--------------------------|-------|------|-------|------|-----------|
| 40 | den_population >18592.692 (p50) &prop_agricultural <0.010 (p59)                              | rate_local4 >0.447 (p43) | 68.58 | 0.76 | 19.67 | 0.06 | 5.54E-06  |
| 41 | prop_transport >0.106 (p45) &prop_agricultural <0.010 (p59)                                  | rate_local4 >0.442 (p43) | 73.70 | 0.75 | 19.65 | 0.06 | 7.072E-05 |
| 42 | med_income <27485.399 (p84) &den_road >10.530 (p49)<br>&prop_agricultural <0.009 (p59)       | rate_local4 >0.394 (p39) | 63.34 | 0.88 | 19.65 | 0.07 | 5.317E-05 |
| 43 | prop_agricultural <0.013 (p61) &prop_shrubland <0.114 (p58)                                  | rate_local4 >0.549 (p58) | 62.04 | 0.63 | 19.64 | 0.09 | 6.993E-05 |
| 44 | med_area_home <18.625 (p56) &prop_shrubland <0.137 (p65)<br>&LU_entropy <0.550 (p49)         | rate_local4 >0.807 (p78) | 27.63 | 0.79 | 19.59 | 0.20 | 2.112E-06 |
| 45 | prop_woodland <0.098 (p47) &LU_entropy <0.543 (p46)                                          | rate_local4 >0.806 (p78) | 31.56 | 0.60 | 19.48 | 0.22 | 7.047E-07 |
| 46 | ave_household_size <2.942 (p63) &prop_shrubland <0.146 (p67)<br>&LU_entropy <0.553 (p49)     | rate_local4 >0.801 (p78) | 30.53 | 0.64 | 19.48 | 0.13 | 4.112E-05 |
| 47 | med_area_home <18.434 (p56) &den_bldg >0.140 (p43)<br>&LU_entropy <0.554 (p50)               | rate_local4 >0.804 (p78) | 27.68 | 0.77 | 19.44 | 0.19 | 2.949E-05 |
| 48 | LU_entropy <0.546 (p47) &POI_den_telecom_elec >223.612 (p65)                                 | rate_local4 >0.817 (p78) | 32.28 | 0.56 | 19.43 | 0.13 | 4.9E-05   |
| 49 | POI_den_transport >904.959 (p71)                                                             | rate_local4 >0.726 (p73) | 36.27 | 0.60 | 19.27 | 0.32 | 1.954E-14 |
| 50 | ave_household_size <2.826 (p49) &prop_rural_set <0.022 (p64)<br>&prop_shrubland <0.125 (p61) | rate_local4 >0.722 (p72) | 34.34 | 0.64 | 19.25 | 0.10 | 6.966E-05 |
| 51 | den_road >16.034 (p70)                                                                       | rate_local4 >0.759 (p74) | 35.84 | 0.56 | 19.14 | 0.30 | 2.191E-12 |
| 52 | POI_den_mall_mkt >208.752 (p73)                                                              | rate_local4 >0.753 (p74) | 34.64 | 0.58 | 19.11 | 0.32 | 1.821E-11 |
| 53 | POI_den_sports >598.644 (p72)                                                                | rate_local4 >0.751 (p74) | 34.76 | 0.58 | 19.11 | 0.32 | 9.183E-12 |
| 54 | med_area_home <17.698 (p54) &prop_transport >0.103 (p44)<br>&LU_entropy <0.553 (p49)         | rate_local4 >0.797 (p77) | 27.09 | 0.80 | 19.10 | 0.18 | 6.196E-05 |
| 55 | med_area_home <18.625 (p56) &prop_woodland <0.084 (p42)<br>&LU_entropy <0.550 (p49)          | rate_local4 >0.807 (p78) | 26.53 | 0.81 | 19.00 | 0.22 | 1.544E-05 |
| 56 | LU_entropy <0.548 (p48) &POI_den_edu >204.703 (p63)                                          | rate_local4 >0.788 (p77) | 32.48 | 0.57 | 18.90 | 0.14 | 5.243E-05 |
| 57 | med_income <27504.973 (p84) &den_public_trans >16.600 (p50)<br>&prop_shrubland <0.099 (p55)  | rate_local4 >0.437 (p43) | 60.87 | 0.81 | 18.88 | 0.07 | 4.031E-05 |
| 58 | prop_woodland <0.111 (p50) &POI_den_edu >253.687 (p65)                                       | rate_local4 >0.761 (p74) | 32.92 | 0.60 | 18.77 | 0.10 | 7.123E-05 |
| 59 | den_population >19181.514 (p50) &LU_entropy <0.547 (p47)                                     | rate_local4 >0.748 (p74) | 31.41 | 0.66 | 18.75 | 0.25 | 2.886E-08 |
| 60 | prop_agricultural <0.002 (p47) &LU_entropy <0.543 (p46)                                      | rate_local4 >0.811 (p78) | 32.48 | 0.53 | 18.69 | 0.16 | 1.313E-05 |
| 61 | prop_agricultural <0.000 (p37)                                                               | rate_local4 >0.709 (p71) | 41.79 | 0.53 | 18.66 | 0.24 | 1.304E-10 |
| 62 | POI_den_telecom_elec >374.340 (p72)                                                          | rate_local4 >0.741 (p74) | 34.54 | 0.58 | 18.63 | 0.31 | 9.927E-12 |
| 63 | den_public_trans >16.405 (p50) &LU_entropy <0.555 (p50)                                      | rate_local4 >0.790 (p77) | 32.08 | 0.57 | 18.56 | 0.20 | 2.016E-08 |
| 64 | prop_transport >0.103 (p43) &prop_woodland <0.119 (p52)                                      | rate_local4 >0.760 (p74) | 40.00 | 0.48 | 18.52 | 0.10 | 2.999E-05 |

|           |                                                                                           |                          |       |      |       |      |           |
|-----------|-------------------------------------------------------------------------------------------|--------------------------|-------|------|-------|------|-----------|
| <b>65</b> | ave_household_size <2.826 (p49) &prop_rural_set <0.047 (p73) &prop_grassland <0.030 (p54) | rate_local4 >0.722 (p72) | 33.27 | 0.63 | 18.42 | 0.10 | 3.786E-05 |
| <b>66</b> | den_bldg >0.240 (p64)                                                                     | rate_local4 >0.681 (p70) | 42.91 | 0.55 | 18.42 | 0.24 | 2.469E-09 |
| <b>67</b> | med_income <24159.180 (p79) &den_bldg >0.291 (p72)                                        | rate_local4 >0.784 (p76) | 29.39 | 0.63 | 18.17 | 0.13 | 2.873E-05 |
| <b>68</b> | prop_woodland <0.013 (p23)                                                                | rate_local4 >0.786 (p77) | 29.80 | 0.62 | 18.15 | 0.38 | 9.845E-13 |
| <b>69</b> | med_income <24553.043 (p79) &POI_den_edu >218.294 (p64)                                   | rate_local4 >0.847 (p80) | 30.50 | 0.52 | 18.11 | 0.11 | 6.863E-05 |
| <b>70</b> | prop_higher_edu <0.357 (p84) &den_bldg >0.189 (p53) &LU_entropy <0.549 (p48)              | rate_local4 >0.878 (p80) | 25.79 | 0.65 | 17.98 | 0.13 | 7.241E-05 |
| <b>71</b> | prop_shrubland <0.000 (p0)                                                                | rate_local4 >0.777 (p76) | 27.26 | 0.72 | 17.87 | 0.47 | 1.265E-13 |
| <b>72</b> | prop_over65 >0.114 (p15) &den_public_trans >26.736 (p59) &prop_shrubland <0.099 (p55)     | rate_local4 >0.437 (p43) | 55.51 | 0.82 | 17.87 | 0.05 | 4.406E-05 |
| <b>73</b> | med_income <28872.090 (p84) &prop_rural_set <0.050 (p74) &prop_transport >0.064 (p35)     | rate_local4 >0.342 (p36) | 77.49 | 0.86 | 17.80 | 0.06 | 5.14E-05  |
| <b>74</b> | prop_over65 >0.109 (p11) &den_road >18.717 (p77)                                          | rate_local4 >0.573 (p61) | 35.49 | 0.82 | 17.75 | 0.08 | 3.421E-05 |
| <b>75</b> | med_area_home <16.794 (p50) &LU_entropy <0.555 (p50)                                      | rate_local4 >0.804 (p78) | 27.61 | 0.65 | 17.74 | 0.28 | 3.167E-08 |
| <b>76</b> | prop_grassland <0.002 (p20)                                                               | rate_local4 >0.810 (p78) | 27.51 | 0.64 | 17.74 | 0.41 | 4.673E-13 |
| <b>77</b> | prop_agricultural <0.014 (p61) &prop_woodland <0.092 (p45)                                | rate_local4 >0.719 (p71) | 38.48 | 0.53 | 17.71 | 0.09 | 7.405E-05 |
| <b>78</b> | prop_rural_set <0.017 (p62) &prop_woodland <0.093 (p45)                                   | rate_local4 >0.706 (p71) | 38.12 | 0.55 | 17.71 | 0.11 | 7.082E-05 |
| <b>79</b> | prop_over65 >0.109 (p11) &prop_agricultural <0.000 (p38)                                  | rate_local4 >0.450 (p44) | 56.12 | 0.79 | 17.69 | 0.06 | 6.022E-05 |
| <b>80</b> | den_road >8.024 (p38) &prop_agricultural <0.012 (p60)                                     | rate_local4 >0.537 (p56) | 65.85 | 0.61 | 17.68 | 0.06 | 6.882E-05 |
| <b>81</b> | med_income <28502.705 (p84) &prop_agricultural <0.010 (p59)                               | rate_local4 >0.394 (p39) | 76.88 | 0.78 | 17.58 | 0.07 | 5.216E-05 |
| <b>82</b> | med_income <23832.199 (p79) &prop_transport >0.245 (p72)                                  | rate_local4 >0.801 (p78) | 28.25 | 0.61 | 17.56 | 0.10 | 7.895E-05 |
| <b>83</b> | prop_rural_set <0.013 (p59) &prop_grassland <0.027 (p51)                                  | rate_local4 >0.529 (p56) | 56.67 | 0.66 | 17.50 | 0.07 | 5.015E-05 |
| <b>84</b> | den_public_trans >17.793 (p52) &prop_woodland <0.107 (p50)                                | rate_local4 >0.783 (p76) | 34.17 | 0.50 | 17.45 | 0.12 | 7.135E-05 |
| <b>85</b> | den_bldg >0.109 (p36) &prop_woodland <0.111 (p50)                                         | rate_local4 >0.749 (p74) | 40.58 | 0.46 | 17.45 | 0.07 | 8.156E-05 |
| <b>86</b> | prop_rural_set <0.051 (p75) &prop_transport >0.079 (p36)                                  | rate_local4 >0.422 (p42) | 79.96 | 0.73 | 17.40 | 0.06 | 2.295E-05 |
| <b>87</b> | med_area_home <17.020 (p52) &prop_agricultural <0.012 (p60) &prop_shrubland <0.241 (p86)  | rate_local4 >0.366 (p36) | 65.92 | 0.86 | 17.36 | 0.03 | 5.065E-05 |
| <b>88</b> | den_population >18592.692 (p50) &den_road >15.388 (p69)                                   | rate_local4 >0.466 (p46) | 47.11 | 0.83 | 17.35 | 0.06 | 1.854E-05 |
| <b>89</b> | ave_household_size <2.904 (p63) &LU_entropy <0.553 (p49)                                  | rate_local4 >0.818 (p78) | 30.27 | 0.52 | 17.30 | 0.16 | 7.853E-05 |
| <b>90</b> | prop_private_resid >0.086 (p63) &prop_woodland <0.093 (p45)                               | rate_local4 >0.780 (p76) | 30.13 | 0.57 | 17.25 | 0.16 | 1.712E-05 |
| <b>91</b> | med_income <23474.184 (p78) &prop_private_resid >0.049 (p50) &LU_entropy <0.551 (p49)     | rate_local4 >0.817 (p78) | 24.80 | 0.73 | 17.20 | 0.20 | 2.791E-05 |

|     |                                                                                               |                          |       |      |       |      |           |
|-----|-----------------------------------------------------------------------------------------------|--------------------------|-------|------|-------|------|-----------|
| 92  | med_income <26724.437 (p83) &den_road >18.654 (p77)                                           | rate_local4 >0.801 (p78) | 26.01 | 0.68 | 17.16 | 0.11 | 6.371E-05 |
| 93  | ave_household_size <2.779 (p37) &prop_rural_set <0.004 (p51)                                  | rate_local4 >0.708 (p71) | 32.35 | 0.62 | 17.16 | 0.19 | 5.292E-05 |
| 94  | med_income <21422.604 (p75) &prop_shrubland <0.121 (p60) &POI_den_sports >492.479 (p69)       | rate_local4 >0.545 (p57) | 36.54 | 0.83 | 17.15 | 0.05 | 8.078E-05 |
| 95  | prop_transport >0.224 (p69)                                                                   | rate_local4 >0.799 (p77) | 32.52 | 0.49 | 16.97 | 0.26 | 5.913E-11 |
| 96  | med_income <23474.184 (p78) &prop_open_recreation >0.029 (p47) &LU_entropy <0.554 (p50)       | rate_local4 >0.792 (p77) | 25.02 | 0.73 | 16.85 | 0.18 | 6.076E-05 |
| 97  | ave_household_size <2.749 (p37) &prop_grassland <0.008 (p32)                                  | rate_local4 >0.847 (p80) | 24.33 | 0.67 | 16.74 | 0.20 | 2.298E-05 |
| 98  | prop_private_resid >0.060 (p55) &LU_entropy <0.549 (p48)                                      | rate_local4 >0.787 (p77) | 29.01 | 0.57 | 16.73 | 0.19 | 4.317E-06 |
| 99  | ave_household_size <2.749 (p37) &prop_agricultural <0.001 (p44)                               | rate_local4 >0.720 (p71) | 29.90 | 0.64 | 16.71 | 0.20 | 6.566E-05 |
| 100 | ave_household_size <2.779 (p37) &prop_shrubland <0.076 (p51)                                  | rate_local4 >0.708 (p71) | 32.87 | 0.59 | 16.64 | 0.16 | 7.191E-05 |
| 101 | med_income <23824.720 (p79) &prop_private_resid >0.097 (p65)                                  | rate_local4 >0.799 (p77) | 27.80 | 0.58 | 16.64 | 0.16 | 4.271E-05 |
| 102 | den_public_trans >22.586 (p56) &prop_shrubland <0.099 (p55)                                   | rate_local4 >0.437 (p43) | 62.74 | 0.76 | 16.63 | 0.05 | 4.496E-05 |
| 103 | ave_household_size <2.792 (p37) &den_population >15122.431 (p46) &prop_rural_set <0.008 (p56) | rate_local4 >0.565 (p60) | 35.31 | 0.78 | 16.43 | 0.10 | 2.842E-06 |
| 104 | med_income <27224.417 (p84) &den_bldg >0.169 (p50) &prop_industrial <0.000 (p43)              | rate_local4 >0.900 (p81) | 23.02 | 0.65 | 16.40 | 0.22 | 9.264E-06 |
| 105 | den_population >29701.369 (p63)                                                               | rate_local4 >0.428 (p42) | 63.16 | 0.76 | 16.36 | 0.20 | 4.413E-07 |
| 106 | med_income <24215.184 (p79) &prop_industrial <0.000 (p0) &POI_den_edu >218.294 (p64)          | rate_local4 >0.910 (p81) | 22.07 | 0.71 | 16.36 | 0.23 | 7.184E-05 |
| 107 | build_area_pp <190.427 (p88) &prop_agricultural <0.014 (p61)                                  | rate_local4 >0.304 (p29) | 98.10 | 0.84 | 16.22 | 0.04 | 8.088E-05 |
| 108 | med_area_home <19.541 (p61) &prop_agricultural <0.007 (p55) &LU_entropy <0.528 (p40)          | rate_local4 >0.686 (p70) | 27.32 | 0.76 | 16.17 | 0.13 | 7.723E-05 |
| 109 | med_income <24831.420 (p79) &prop_publicResid <0.037 (p70) &prop_transport >0.123 (p50)       | rate_local4 >0.829 (p79) | 25.01 | 0.61 | 16.10 | 0.17 | 5.443E-05 |
| 110 | med_income <26859.289 (p83) &den_bldg >0.104 (p35) &prop_shrubland <0.125 (p61)               | rate_local4 >0.336 (p35) | 78.48 | 0.84 | 16.08 | 0.05 | 7.191E-05 |
| 111 | med_income <24553.043 (p79) &prop_industrial <0.000 (p0) &prop_woodland <0.070 (p37)          | rate_local4 >0.869 (p80) | 21.39 | 0.80 | 16.04 | 0.19 | 7.757E-06 |
| 112 | med_income <24553.043 (p79) &den_road >12.323 (p57) &prop_industrial <0.000 (p0)              | rate_local4 >0.893 (p81) | 21.91 | 0.71 | 16.04 | 0.23 | 6.314E-05 |

|     |                                                                                            |                          |       |      |       |      |           |
|-----|--------------------------------------------------------------------------------------------|--------------------------|-------|------|-------|------|-----------|
| 113 | ave_household_size <2.904 (p63) &prop_private_resid >0.075 (p60) &LU_entropy <0.553 (p49)  | rate_local4 >0.809 (p78) | 22.81 | 0.77 | 16.02 | 0.21 | 3.412E-05 |
| 114 | med_income <24831.420 (p79) &prop_publicResid <0.037 (p70) &prop_shrubland <0.021 (p37)    | rate_local4 >0.846 (p80) | 23.43 | 0.66 | 16.01 | 0.17 | 7.987E-05 |
| 115 | prop_open_recreation >0.029 (p47) &LU_entropy <0.554 (p50)                                 | rate_local4 >0.792 (p77) | 27.94 | 0.55 | 15.87 | 0.18 | 2.402E-05 |
| 116 | med_income <24553.043 (p79) &prop_industrial <0.000 (p0) &LU_entropy <0.548 (p48)          | rate_local4 >0.910 (p81) | 21.56 | 0.68 | 15.74 | 0.21 | 6.327E-05 |
| 117 | ave_household_size <2.707 (p37) &den_bldg >0.180 (p51)                                     | rate_local4 >0.828 (p79) | 25.94 | 0.55 | 15.69 | 0.15 | 7.309E-05 |
| 118 | med_income <23837.723 (p79) &prop_industrial <0.000 (p0) &prop_shrubland <0.037 (p41)      | rate_local4 >0.869 (p80) | 21.47 | 0.73 | 15.61 | 0.21 | 8.15E-05  |
| 119 | prop_industrial <0.000 (p0) &prop_woodland <0.094 (p45)                                    | rate_local4 >0.856 (p80) | 23.98 | 0.59 | 15.58 | 0.22 | 1.603E-05 |
| 120 | med_income <27750.705 (p84) &den_public_trans >18.296 (p53)                                | rate_local4 >0.366 (p36) | 72.86 | 0.81 | 15.57 | 0.05 | 6.584E-05 |
| 121 | med_income <27423.226 (p84) &prop_industrial <0.001 (p48) &prop_transport >0.089 (p39)     | rate_local4 >0.919 (p81) | 23.02 | 0.55 | 15.47 | 0.17 | 2.014E-05 |
| 122 | med_income <28872.090 (p84) &den_road >9.412 (p44) &prop_rural_set <0.050 (p74)            | rate_local4 >0.297 (p29) | 70.24 | 0.90 | 15.44 | 0.05 | 2.952E-05 |
| 123 | med_area_home <17.020 (p52) &prop_rural_set <0.040 (p71) &prop_shrubland <0.241 (p86)      | rate_local4 >0.309 (p30) | 69.21 | 0.89 | 15.41 | 0.05 | 7.014E-06 |
| 124 | med_income <23475.477 (p78) &den_road >10.922 (p51) &prop_publicResid <0.024 (p66)         | rate_local4 >0.878 (p80) | 22.54 | 0.62 | 15.40 | 0.21 | 5.402E-05 |
| 125 | prop_shrubland <0.149 (p68) &POI_den_edu >230.921 (p64)                                    | rate_local4 >0.437 (p43) | 56.18 | 0.77 | 15.39 | 0.04 | 7.177E-05 |
| 126 | den_population >18592.692 (p50) &prop_grassland <0.011 (p36)                               | rate_local4 >0.466 (p46) | 47.10 | 0.78 | 15.39 | 0.07 | 1.701E-05 |
| 127 | med_income <24792.419 (p79) &prop_industrial <0.001 (p50) &prop_grassland <0.036 (p58)     | rate_local4 >0.964 (p84) | 21.99 | 0.54 | 15.38 | 0.18 | 3.553E-05 |
| 128 | med_income <28003.284 (p84) &prop_rural_set <0.001 (p48)                                   | rate_local4 >0.339 (p35) | 64.53 | 0.87 | 15.35 | 0.08 | 5.209E-05 |
| 129 | med_income <24054.127 (p79) &den_public_trans >18.631 (p53) &prop_publicResid <0.024 (p66) | rate_local4 >0.774 (p75) | 24.08 | 0.68 | 15.33 | 0.19 | 4.364E-05 |
| 130 | med_area_home <17.020 (p52) &prop_agricultural <0.012 (p60)                                | rate_local4 >0.329 (p33) | 70.04 | 0.86 | 15.30 | 0.09 | 6.1E-05   |
| 131 | ave_household_size <2.904 (p63) &prop_private_resid >0.090 (p64)                           | rate_local4 >0.792 (p77) | 25.32 | 0.60 | 15.28 | 0.18 | 4.788E-05 |
| 132 | ave_household_size <2.792 (p37) &den_population >15122.431 (p46)                           | rate_local4 >0.753 (p74) | 29.46 | 0.54 | 15.27 | 0.15 | 7.53E-05  |

|     |                                                                                          |                          |        |      |       |      |           |
|-----|------------------------------------------------------------------------------------------|--------------------------|--------|------|-------|------|-----------|
| 133 | med_income <23878.187 (p79) &den_population >20544.461 (p52) &LU_entropy <0.514 (p38)    | rate_local4 >0.811 (p78) | 21.80  | 0.76 | 15.16 | 0.13 | 4.218E-05 |
| 134 | ave_household_size <2.749 (p37) &prop_industrial <0.000 (p0)                             | rate_local4 >0.844 (p80) | 22.60  | 0.62 | 14.96 | 0.25 | 1.409E-05 |
| 135 | prop_higher_edu <0.331 (p79) &prop_rural_set <0.039 (p71) &prop_shrubland <0.122 (p60)   | rate_local4 >0.311 (p30) | 61.36  | 0.91 | 14.70 | 0.07 | 1.427E-05 |
| 136 | den_road >8.269 (p39) &prop_shrubland <0.145 (p67)                                       | rate_local4 >0.391 (p39) | 86.89  | 0.73 | 14.69 | 0.03 | 7.999E-05 |
| 137 | prop_over65 >0.114 (p15) &den_public_trans >29.911 (p62)                                 | rate_local4 >0.356 (p36) | 59.72  | 0.85 | 14.53 | 0.04 | 8.011E-05 |
| 138 | prop_household_3gen <0.078 (p91) &prop_transport >0.093 (p39)                            | rate_local4 >0.241 (p21) | 102.18 | 0.88 | 14.45 | 0.02 | 4.721E-05 |
| 139 | med_income <24793.016 (p79) &den_bldg >0.109 (p36) &prop_publicResid <0.023 (p66)        | rate_local4 >0.866 (p80) | 24.10  | 0.50 | 14.45 | 0.16 | 4.661E-05 |
| 140 | prop_higher_edu <0.379 (p87) &prop_shrubland <0.181 (p78) &prop_grassland <0.047 (p61)   | rate_local4 >0.297 (p29) | 87.77  | 0.84 | 14.44 | 0.02 | 4.164E-05 |
| 141 | den_bldg >0.104 (p35) &prop_shrubland <0.145 (p67)                                       | rate_local4 >0.391 (p39) | 90.66  | 0.72 | 14.42 | 0.04 | 1.077E-06 |
| 142 | prop_preprim_edu <0.148 (p90) &med_income <23790.502 (p79) &prop_grassland <0.040 (p59)  | rate_local4 >0.234 (p21) | 81.46  | 0.92 | 14.38 | 0.03 | 4.948E-05 |
| 143 | build_area_pp <104.067 (p69) &prop_rural_set <0.046 (p73) &prop_shrubland <0.213 (p82)   | rate_local4 >0.299 (p29) | 74.57  | 0.87 | 14.29 | 0.05 | 5.959E-05 |
| 144 | prop_private_resid >0.091 (p64)                                                          | rate_local4 >0.753 (p74) | 34.63  | 0.44 | 14.26 | 0.18 | 1.071E-05 |
| 145 | prop_higher_edu <0.361 (p84) &den_bldg >0.197 (p55) &prop_industrial <0.000 (p0)         | rate_local4 >0.883 (p81) | 20.45  | 0.63 | 14.12 | 0.15 | 1.826E-05 |
| 146 | med_income <21397.583 (p75) &prop_publicResid <0.011 (p61) &prop_rural_set <0.002 (p49)  | rate_local4 >0.791 (p77) | 20.92  | 0.73 | 14.08 | 0.25 | 8.326E-05 |
| 147 | med_income <31100.793 (p88) &den_road >11.705 (p54) &prop_shrubland <0.149 (p68)         | rate_local4 >0.294 (p29) | 69.48  | 0.89 | 14.08 | 0.01 | 7.267E-05 |
| 148 | med_area_home <16.868 (p50) &prop_grassland <0.003 (p23)                                 | rate_local4 >0.879 (p81) | 19.64  | 0.69 | 14.07 | 0.15 | 2.445E-05 |
| 149 | med_income <28097.287 (p84) &prop_shrubland <0.181 (p78) &prop_grassland <0.047 (p61)    | rate_local4 >0.274 (p28) | 86.48  | 0.87 | 14.03 | 0.02 | 1.325E-05 |
| 150 | LU_entropy <0.545 (p46)                                                                  | rate_local4 >0.840 (p79) | 35.12  | 0.36 | 14.02 | 0.14 | 1.637E-08 |
| 151 | med_area_home <17.698 (p54) &den_public_trans >17.842 (p52) &prop_shrubland <0.226 (p84) | rate_local4 >0.275 (p28) | 69.63  | 0.90 | 13.83 | 0.01 | 4.31E-06  |
| 152 | prop_higher_edu <0.379 (p87) &den_road >10.254 (p48)                                     | rate_local4 >0.282 (p28) | 79.35  | 0.87 | 13.71 | 0.04 | 3.768E-05 |
| 153 | den_road >10.435 (p49) &prop_utilities <0.003 (p36)                                      | rate_local4 >0.770 (p75) | 22.41  | 0.64 | 13.64 | 0.25 | 6.063E-05 |
| 154 | den_public_trans >23.156 (p57) &prop_publicResid <0.014 (p62)                            | rate_local4 >0.850 (p80) | 23.02  | 0.52 | 13.63 | 0.17 | 4.873E-05 |

|            |                                                                                              |                          |       |      |       |      |           |
|------------|----------------------------------------------------------------------------------------------|--------------------------|-------|------|-------|------|-----------|
| <b>155</b> | prop_higher_edu <0.322 (p79) &den_bldg >0.167 (p49)<br>&prop_shrubland <0.156 (p70)          | rate_local4 >0.282 (p28) | 67.06 | 0.89 | 13.35 | 0.01 | 1.947E-05 |
| <b>156</b> | med_income <28423.363 (p84) &med_area_home <17.098 (p52)<br>&prop_rural_set <0.009 (p57)     | rate_local4 >0.260 (p25) | 65.56 | 0.92 | 13.18 | 0.01 | 7.784E-05 |
| <b>157</b> | med_area_home <17.698 (p54) &den_public_trans >17.842 (p52)                                  | rate_local4 >0.275 (p28) | 71.04 | 0.89 | 13.15 | 0.05 | 5.01E-05  |
| <b>158</b> | ave_household_size <2.681 (p29)                                                              | rate_local4 >0.823 (p79) | 27.71 | 0.42 | 13.00 | 0.20 | 3.338E-06 |
| <b>159</b> | med_income <24270.629 (p79) &prop_publicResid <0.000 (p0)<br>&prop_agricultural <0.012 (p60) | rate_local4 >0.870 (p80) | 18.55 | 0.67 | 13.00 | 0.21 | 3.075E-05 |
| <b>160</b> | prop_higher_edu <0.379 (p87) &prop_grassland <0.047 (p61)                                    | rate_local4 >0.282 (p28) | 90.36 | 0.84 | 12.99 | 0.03 | 5.879E-05 |
| <b>161</b> | med_area_home <17.698 (p54) &prop_rural_set <0.010 (p59)                                     | rate_local4 >0.274 (p28) | 68.29 | 0.89 | 12.95 | 0.09 | 1.139E-05 |
| <b>162</b> | prop_transport >0.072 (p36) &prop_utilities <0.003 (p33)                                     | rate_local4 >0.737 (p74) | 23.15 | 0.62 | 12.94 | 0.24 | 1.544E-05 |
| <b>163</b> | prop_over65 >0.114 (p15) &prop_transport >0.268 (p77)                                        | rate_local4 >0.437 (p43) | 36.25 | 0.86 | 12.84 | 0.09 | 2.202E-05 |
| <b>164</b> | build_area_pp <58.358 (p47) &prop_rural_set <0.043 (p72)                                     | rate_local4 >0.302 (p29) | 65.93 | 0.87 | 12.79 | 0.06 | 2.328E-05 |
| <b>165</b> | prop_industrial <0.000 (p0)                                                                  | rate_local4 >1.030 (p86) | 23.89 | 0.31 | 12.74 | 0.17 | 2.01E-07  |
| <b>166</b> | prop_higher_edu <0.322 (p79) &den_bldg >0.167 (p49)                                          | rate_local4 >0.282 (p28) | 68.11 | 0.88 | 12.72 | 0.04 | 2.493E-05 |
| <b>167</b> | prop_over65 >0.114 (p15) &den_bldg >0.337 (p77)                                              | rate_local4 >0.437 (p43) | 36.14 | 0.85 | 12.63 | 0.07 | 7.259E-05 |
| <b>168</b> | prop_utilities <0.003 (p33) &prop_agricultural <0.008 (p56)                                  | rate_local4 >0.737 (p74) | 21.15 | 0.66 | 12.49 | 0.29 | 4.188E-06 |
| <b>169</b> | med_income <14713.230 (p25) &LU_entropy <0.523 (p40)                                         | rate_local4 >0.824 (p79) | 16.81 | 0.84 | 12.42 | 0.47 | 4.118E-07 |
| <b>170</b> | prop_higher_edu <0.356 (p84) &den_public_trans >26.707 (p59)                                 | rate_local4 >0.262 (p25) | 65.42 | 0.91 | 12.39 | 0.04 | 5.906E-05 |
| <b>171</b> | den_bldg >0.187 (p53) &prop_utilities <0.003 (p36)                                           | rate_local4 >0.793 (p77) | 20.32 | 0.61 | 12.29 | 0.21 | 2.597E-05 |
| <b>172</b> | med_income <24553.043 (p79) &prop_shrubland <0.177 (p77)<br>&POI_den_edu >218.294 (p64)      | rate_local4 >0.300 (p29) | 51.18 | 0.92 | 12.23 | 0.03 | 5.311E-06 |
| <b>173</b> | den_population >24308.570 (p56) &prop_publicResid <0.006 (p57)                               | rate_local4 >0.827 (p79) | 19.33 | 0.59 | 12.19 | 0.24 | 5.111E-05 |
| <b>174</b> | med_area_home <16.794 (p50) &prop_private_resid >0.153 (p76)                                 | rate_local4 >0.799 (p77) | 17.87 | 0.73 | 12.15 | 0.28 | 5.208E-05 |
| <b>175</b> | prop_rural_set <0.005 (p54) &prop_utilities <0.003 (p33)                                     | rate_local4 >0.737 (p74) | 20.96 | 0.64 | 12.10 | 0.25 | 5.319E-05 |
| <b>176</b> | den_population >46473.903 (p74) &prop_rural_set <0.047 (p73)                                 | rate_local4 >0.302 (p29) | 51.20 | 0.92 | 12.08 | 0.02 | 4.581E-05 |
| <b>177</b> | med_area_home <17.039 (p52) &prop_shrubland <0.277 (p88)                                     | rate_local4 >0.278 (p28) | 86.24 | 0.84 | 11.89 | 0.03 | 8.105E-05 |
| <b>178</b> | med_income <23814.728 (p79) &prop_shrubland <0.020 (p36)                                     | rate_local4 >0.289 (p29) | 53.79 | 0.91 | 11.87 | 0.08 | 8.878E-06 |
| <b>179</b> | den_population >46473.903 (p74) &prop_rural_set <0.045 (p73)<br>&LU_entropy <0.669 (p85)     | rate_local4 >0.302 (p29) | 48.67 | 0.92 | 11.77 | 0.01 | 1.533E-05 |
| <b>180</b> | prop_rural_set <0.023 (p65)                                                                  | rate_local4 >0.534 (p56) | 73.40 | 0.53 | 11.48 | 0.08 | 5.687E-05 |

|            |                                                                                              |                                   |        |      |       |      |           |
|------------|----------------------------------------------------------------------------------------------|-----------------------------------|--------|------|-------|------|-----------|
| <b>181</b> | prop_utilities <0.003 (p36) &prop_grassland <0.019 (p45)                                     | rate_local4 >0.843 (p80)          | 18.12  | 0.57 | 11.36 | 0.20 | 8.076E-05 |
| <b>182</b> | med_income <28905.229 (p84) &prop_private_resid >0.093 (p65)<br>&prop_shrubland <0.149 (p68) | rate_local4 >0.294 (p29)          | 48.03  | 0.92 | 11.10 | 0.03 | 5.517E-05 |
| <b>183</b> | ave_household_size <2.794 (p37) &prop_gov_insti_faci >0.025 (p36)                            | rate_local4 >0.565 (p60)          | 35.12  | 0.61 | 11.00 | 0.11 | 3.835E-05 |
| <b>184</b> | den_population >52299.793 (p79) &build_area_pp <93.205 (p63)                                 | rate_local4 >0.263 (p26)          | 45.01  | 0.94 | 9.93  | 0.01 | 7.148E-05 |
| <b>185</b> | med_area_home <15.396 (p45)                                                                  | rate_local4 >0.295 (p29)          | 72.01  | 0.81 | 9.65  | 0.11 | 7.299E-05 |
| <b>186</b> | POI_den_edu =448.921-1372.584 (p78-94)                                                       | rate_local4 >0.751 (p74)          | 19.67  | 0.50 | 9.43  | 0.24 | 2.323E-05 |
| <b>187</b> | med_area_home <17.327 (p52) &prop_publicResid <0.000 (p0)                                    | rate_local4 >0.903 (p81)          | 13.61  | 0.51 | 8.66  | 0.26 | 9.869E-06 |
| <b>188</b> | den_public_trans >99.082 (p92)                                                               | rate_local4 >0.840 (p79)          | 11.85  | 0.66 | 8.04  | 0.45 | 4.248E-07 |
| <b>189</b> | prop_household_3gen <0.080 (p92)                                                             | rate_local4 >0.224 (p21)          | 157.09 | 0.80 | 7.21  | 0.04 | 1.041E-07 |
| <b>190</b> | prop_preprim_edu <0.143 (p88)                                                                | rate_local4 >0.449 (p44)          | 108.54 | 0.58 | 7.11  | 0.04 | 5.375E-05 |
| <b>191</b> | POI_den_edu >1372.584 (p94)                                                                  | rate_local4 >0.751 (p74)          | 10.59  | 0.79 | 7.09  | 0.53 | 5.283E-07 |
| <b>192</b> | prop_business >0.137 (p93)                                                                   | rate_local4 >0.874 (p80)          | 8.82   | 0.62 | 6.02  | 0.42 | 1.349E-05 |
| <b>193</b> | med_income <12583.023 (p7)                                                                   | rate_local4 >0.847 (p80)          | 8.69   | 0.63 | 5.77  | 0.42 | 1.349E-05 |
| <b>194</b> | den_public_trans =70.104-99.082 (p86-92)                                                     | rate_local4 >0.840 (p79)          | 8.10   | 0.67 | 5.54  | 0.46 | 4.749E-05 |
| <b>195</b> | prop_business =0.055-0.137 (p86-93)                                                          | rate_local4 >0.874 (p80)          | 8.72   | 0.48 | 5.11  | 0.28 | 4.451E-05 |
| <b>196</b> | gender_ratio <87.319 (p11)                                                                   | rate_local4 >1.248 (p90)          | 7.67   | 0.26 | 4.68  | 0.16 | 7.93E-05  |
| <b>197</b> | prop_preprim_edu <0.155 (p91) &LU_entropy >0.544 (p46)                                       | rate_local4 =0.174-0.799 (p16-77) | 83.75  | 0.81 | 21.42 | 0.06 | 1.084E-06 |
| <b>198</b> | gender_ratio >87.319 (p11) &prop_preprim_edu <0.146 (p89)<br>&LU_entropy >0.524 (p40)        | rate_local4 =0.182-0.915 (p16-81) | 86.55  | 0.84 | 20.68 | 0.02 | 4.368E-05 |
| <b>199</b> | prop_preprim_edu <0.155 (p91) &POI_den_sports <650.387 (p75)                                 | rate_local4 =0.099-0.831 (p13-79) | 110.07 | 0.79 | 19.87 | 0.05 | 3.307E-06 |
| <b>200</b> | prop_preprim_edu <0.155 (p91) &POI_den_transport <1026.641<br>(p75)                          | rate_local4 =0.099-0.831 (p13-79) | 109.37 | 0.79 | 19.51 | 0.05 | 8.209E-06 |
| <b>201</b> | prop_preprim_edu <0.155 (p91) &den_road <16.849 (p72)                                        | rate_local4 =0.099-0.831 (p13-79) | 107.56 | 0.79 | 19.26 | 0.05 | 6.61E-06  |
| <b>202</b> | prop_preprim_edu <0.155 (p91) &POI_den_telecom_elec <326.218<br>(p70)                        | rate_local4 =0.174-0.799 (p16-77) | 97.59  | 0.75 | 19.26 | 0.05 | 1.489E-05 |
| <b>203</b> | prop_preprim_edu <0.139 (p86) &POI_den_mall_mkt <265.556<br>(p77)                            | rate_local4 =0.087-0.979 (p13-85) | 114.62 | 0.85 | 19.17 | 0.07 | 8.331E-07 |
| <b>204</b> | prop_household_3gen <0.080 (p92) &POI_den_sports <650.387<br>(p75)                           | rate_local4 =0.099-0.831 (p13-79) | 112.45 | 0.78 | 18.83 | 0.04 | 9.361E-06 |
| <b>205</b> | gender_ratio >87.639 (p11) &prop_preprim_edu <0.155 (p91)<br>&den_public_trans <80.171 (p89) | rate_local4 =0.099-0.831 (p13-79) | 113.96 | 0.77 | 18.48 | 0.04 | 7.297E-05 |



|     |                                                                     |                                   |        |      |       |      |           |
|-----|---------------------------------------------------------------------|-----------------------------------|--------|------|-------|------|-----------|
| 206 | LU_entropy >0.545 (p46)                                             | rate_local4 =0.183-0.840 (p16-79) | 88.77  | 0.77 | 17.65 | 0.15 | 2.551E-09 |
| 207 | prop_preprim_edu <0.155 (p91) &POI_den_edu <451.677 (p78)           | rate_local4 =0.099-0.831 (p13-79) | 110.24 | 0.77 | 17.39 | 0.05 | 1.909E-05 |
| 208 | prop_preprim_edu <0.155 (p91) &ave_household_size >2.699 (p29)      | rate_local4 =0.108-0.823 (p13-79) | 103.33 | 0.77 | 17.19 | 0.03 | 6.644E-05 |
| 209 | prop_preprim_edu <0.155 (p91) &den_public_trans <57.487 (p82)       | rate_local4 =0.099-0.831 (p13-79) | 119.01 | 0.76 | 17.18 | 0.04 | 7.471E-05 |
| 210 | gender_ratio >87.341 (p11) &LU_entropy >0.510 (p36)                 | rate_local4 =0.132-0.854 (p14-80) | 95.90  | 0.79 | 17.17 | 0.04 | 2.066E-05 |
| 211 | prop_household_3gen <0.080 (p92) &POI_den_edu <450.512 (p78)        | rate_local4 =0.099-0.831 (p13-79) | 112.64 | 0.76 | 16.51 | 0.04 | 3.931E-05 |
| 212 | gender_ratio >87.319 (p11) &ave_household_size >2.693 (p29)         | rate_local4 =0.150-0.840 (p15-79) | 97.65  | 0.75 | 16.43 | 0.04 | 5.746E-05 |
| 213 | prop_preprim_edu <0.155 (p91) &den_bldg <0.401 (p82)                | rate_local4 =0.099-0.831 (p13-79) | 116.85 | 0.74 | 15.50 | 0.04 | 8.169E-05 |
| 214 | prop_preprim_edu <0.126 (p82) &prop_business <0.038 (p84)           | rate_local4 =0.087-0.979 (p13-85) | 114.27 | 0.81 | 15.33 | 0.06 | 1.502E-05 |
| 215 | gender_ratio >87.236 (p11) &den_public_trans <68.524 (p86)          | rate_local4 =0.127-0.819 (p14-78) | 117.02 | 0.73 | 15.28 | 0.04 | 2.348E-05 |
| 216 | gender_ratio >87.511 (p11) &den_road <25.616 (p91)                  | rate_local4 =0.123-0.723 (p14-72) | 111.68 | 0.67 | 15.26 | 0.04 | 3.822E-05 |
| 217 | ave_household_size >2.681 (p29)                                     | rate_local4 =0.108-0.823 (p13-79) | 108.28 | 0.73 | 13.76 | 0.09 | 6.903E-05 |
| 218 | build_area_pp <154.967 (p85)                                        | rate_local4 =0.254-1.043 (p24-86) | 121.92 | 0.68 | 12.49 | 0.07 | 1.507E-06 |
| 219 | den_road =9.806-16.034 (p46-70)                                     | rate_local4 =0.157-0.759 (p15-74) | 41.65  | 0.81 | 11.52 | 0.22 | 6.043E-05 |
| 220 | prop_publicResid >0.054 (p72)                                       | rate_local4 =0.248-1.078 (p23-87) | 47.53  | 0.81 | 10.54 | 0.18 | 2.482E-05 |
| 221 | prop_transport =0.104-0.224 (p44-69)                                | rate_local4 =0.174-0.799 (p16-77) | 40.99  | 0.79 | 9.72  | 0.19 | 6.883E-05 |
| 222 | den_bldg =0.135-0.240 (p42-64)                                      | rate_local4 =0.186-0.681 (p16-70) | 34.08  | 0.73 | 9.65  | 0.21 | 4.157E-05 |
| 223 | den_public_trans >16.405 (p50) &LU_entropy >0.625 (p67)             | rate_local4 =0.282-0.790 (p28-77) | 22.41  | 0.66 | 5.94  | 0.11 | 5.73E-05  |
| 224 | den_public_trans <44.105 (p77) &POI_den_mall_mkt <249.510 (p76)     | rate_local4 <0.720 (p71)          | 124.37 | 0.87 | 22.13 | 0.04 | 1.753E-05 |
| 225 | den_public_trans <40.100 (p73) &POI_den_sports <807.470 (p78)       | rate_local4 <0.711 (p71)          | 120.16 | 0.87 | 21.85 | 0.05 | 2.101E-06 |
| 226 | den_road <17.821 (p75) &den_public_trans <51.003 (p79)              | rate_local4 <0.698 (p70)          | 126.17 | 0.85 | 21.85 | 0.03 | 5.487E-06 |
| 227 | den_public_trans <46.718 (p78) &POI_den_telecom_elec <494.553 (p78) | rate_local4 <0.711 (p71)          | 125.44 | 0.86 | 21.83 | 0.05 | 9.692E-06 |
| 228 | den_public_trans <40.100 (p73) &POI_den_transport <1274.302 (p77)   | rate_local4 <0.711 (p71)          | 120.28 | 0.87 | 21.81 | 0.05 | 7.691E-06 |
| 229 | den_public_trans <49.010 (p79) &POI_den_edu <598.811 (p80)          | rate_local4 <0.735 (p74)          | 131.57 | 0.87 | 21.49 | 0.05 | 2.107E-05 |
| 230 | den_bldg <0.312 (p75) &den_public_trans <49.010 (p79)               | rate_local4 <0.715 (p71)          | 124.37 | 0.85 | 20.42 | 0.04 | 3.894E-05 |
| 231 | den_bldg <0.313 (p75) &POI_den_edu <448.921 (p78)                   | rate_local4 <0.753 (p74)          | 126.52 | 0.88 | 19.83 | 0.03 | 6.557E-05 |

|                                                                               |                          |        |      |       |      |           |
|-------------------------------------------------------------------------------|--------------------------|--------|------|-------|------|-----------|
| <b>232</b> den_road <18.030 (p76) &prop_business <0.063 (p87)                 | rate_local4 <0.698 (p70) | 128.89 | 0.83 | 19.75 | 0.01 | 2.157E-05 |
| <b>233</b> prop_business <0.063 (p87) &POI_den_edu <506.706 (p79)             | rate_local4 <0.784 (p76) | 139.11 | 0.88 | 19.54 | 0.03 | 4.939E-07 |
| <b>234</b> den_bldg <0.330 (p77) &POI_den_sports <958.635 (p81)               | rate_local4 <0.766 (p74) | 132.80 | 0.88 | 19.53 | 0.03 | 5.38E-05  |
| <b>235</b> POI_den_transport <904.959 (p71)                                   | rate_local4 <0.726 (p73) | 129.24 | 0.85 | 19.32 | 0.13 | 1.954E-14 |
| <b>236</b> POI_den_sports <598.644 (p72)                                      | rate_local4 <0.751 (p74) | 132.66 | 0.86 | 19.25 | 0.12 | 9.183E-12 |
| <b>237</b> POI_den_mall_mkt <208.752 (p73)                                    | rate_local4 <0.753 (p74) | 132.99 | 0.86 | 19.24 | 0.12 | 1.821E-11 |
| <b>238</b> den_bldg <0.330 (p77) &POI_den_transport <1601.585 (p81)           | rate_local4 <0.766 (p74) | 132.28 | 0.88 | 19.22 | 0.04 | 4.932E-05 |
| <b>239</b> den_population <35216.647 (p66) &den_public_trans <40.100 (p73)    | rate_local4 <0.715 (p71) | 108.59 | 0.87 | 19.22 | 0.05 | 7.172E-05 |
| <b>240</b> den_bldg <0.330 (p77) &den_road <20.312 (p81)                      | rate_local4 <0.766 (p74) | 134.97 | 0.87 | 18.97 | 0.03 | 6.657E-05 |
| <b>241</b> POI_den_telecom_elec <374.340 (p72)                                | rate_local4 <0.741 (p74) | 131.51 | 0.85 | 18.85 | 0.12 | 9.927E-12 |
| <b>242</b> den_bldg <0.312 (p75) &POI_den_mall_mkt <474.871 (p86)             | rate_local4 <0.767 (p74) | 132.92 | 0.87 | 18.79 | 0.03 | 4.724E-06 |
| <b>243</b> den_bldg <0.341 (p77) &POI_den_telecom_elec <755.639 (p85)         | rate_local4 <0.758 (p74) | 134.71 | 0.86 | 18.75 | 0.03 | 5.8E-06   |
| <b>244</b> POI_den_sports <820.348 (p78) &POI_den_edu <442.307 (p78)          | rate_local4 <0.755 (p74) | 134.82 | 0.86 | 18.42 | 0.01 | 3.309E-05 |
| <b>245</b> prop_business <0.063 (p87) &POI_den_sports <1059.151 (p82)         | rate_local4 <0.784 (p76) | 141.87 | 0.87 | 18.21 | 0.03 | 4.824E-06 |
| <b>246</b> prop_business <0.051 (p86) &POI_den_transport <1601.585 (p81)      | rate_local4 <0.766 (p74) | 136.33 | 0.86 | 17.94 | 0.02 | 5.973E-05 |
| <b>247</b> den_population <36883.552 (p68) &prop_business <0.065 (p87)        | rate_local4 <0.736 (p74) | 113.45 | 0.86 | 17.86 | 0.04 | 2.739E-06 |
| <b>248</b> prop_business <0.057 (p86) &POI_den_telecom_elec <653.258 (p82)    | rate_local4 <0.825 (p79) | 143.85 | 0.89 | 17.44 | 0.03 | 4.72E-05  |
| <b>249</b> den_population <7339.493 (p37)                                     | rate_local4 <0.177 (p16) | 30.40  | 0.37 | 17.43 | 0.21 | 2.35E-11  |
| <b>250</b> den_road <25.616 (p91) &POI_den_edu <396.631 (p76)                 | rate_local4 <0.835 (p79) | 138.92 | 0.89 | 16.88 | 0.01 | 3.239E-05 |
| <b>251</b> POI_den_edu <448.921 (p78)                                         | rate_local4 <0.751 (p74) | 135.83 | 0.84 | 16.60 | 0.10 | 3.487E-11 |
| <b>252</b> POI_den_edu <448.921 (p78) &POI_den_mall_mkt <311.791 (p78)        | rate_local4 <0.725 (p73) | 124.79 | 0.79 | 15.88 | 0.01 | 4.992E-05 |
| <b>253</b> prop_shrubland >0.064 (p49)                                        | rate_local4 <0.777 (p76) | 99.56  | 0.90 | 15.80 | 0.14 | 7.92E-07  |
| <b>254</b> prop_private_resid <0.114 (p69) &prop_publicResid <0.033 (p69)     | rate_local4 <0.183 (p16) | 30.49  | 0.33 | 15.53 | 0.10 | 2.403E-05 |
| <b>255</b> ave_household_size >2.492 (p11) &POI_den_transport <1730.985 (p83) | rate_local4 <0.884 (p81) | 144.02 | 0.89 | 14.97 | 0.02 | 3.175E-05 |
| <b>256</b> prop_woodland >0.097 (p46)                                         | rate_local4 <0.786 (p77) | 103.57 | 0.89 | 14.94 | 0.13 | 2.724E-07 |
| <b>257</b> prop_publicResid <0.056 (p73) &prop_business <0.008 (p59)          | rate_local4 <0.720 (p71) | 86.79  | 0.87 | 14.90 | 0.06 | 1.305E-05 |

|     |                                                                           |                          |        |      |       |      |           |
|-----|---------------------------------------------------------------------------|--------------------------|--------|------|-------|------|-----------|
| 258 | prop_grassland >0.040 (p59)                                               | rate_local4 <0.517 (p54) | 64.87  | 0.69 | 14.64 | 0.16 | 2.082E-05 |
| 259 | prop_private_resid <0.091 (p64)                                           | rate_local4 <0.753 (p74) | 114.54 | 0.84 | 14.17 | 0.10 | 1.071E-05 |
| 260 | prop_agricultural >0.021 (p67)                                            | rate_local4 <0.416 (p42) | 43.29  | 0.60 | 13.19 | 0.18 | 4.033E-05 |
| 261 | den_bldg <0.135 (p42)                                                     | rate_local4 <0.186 (p16) | 27.77  | 0.31 | 12.92 | 0.14 | 2.104E-07 |
| 262 | prop_private_resid <0.156 (p76) &POI_den_edu <972.143 (p91)               | rate_local4 <0.957 (p83) | 141.44 | 0.91 | 12.84 | 0.02 | 7.996E-05 |
| 263 | den_public_trans <4.829 (p30)                                             | rate_local4 <0.183 (p16) | 22.78  | 0.36 | 12.65 | 0.20 | 2.702E-08 |
| 264 | gender_ratio >87.511 (p11) &den_bldg <0.299 (p74) &den_road <25.616 (p91) | rate_local4 <1.127 (p88) | 130.78 | 0.97 | 12.20 | 0.00 | 4.271E-05 |
| 265 | prop_transport <0.104 (p44)                                               | rate_local4 <0.174 (p16) | 27.43  | 0.29 | 11.96 | 0.13 | 1.188E-06 |
| 266 | den_road <9.806 (p46)                                                     | rate_local4 <0.157 (p15) | 26.95  | 0.27 | 11.89 | 0.12 | 6.292E-06 |
| 267 | prop_rural_set >0.023 (p65)                                               | rate_local4 <0.534 (p56) | 53.70  | 0.70 | 11.73 | 0.15 | 5.687E-05 |
| 268 | prop_gov_insti_faci <0.025 (p36)                                          | rate_local4 <0.050 (p13) | 21.12  | 0.28 | 11.13 | 0.15 | 2.825E-06 |
| 269 | prop_business <0.055 (p86)                                                | rate_local4 <0.874 (p80) | 157.87 | 0.86 | 11.10 | 0.06 | 6.039E-10 |
| 270 | gender_ratio >87.659 (p11) &prop_business <0.024 (p79)                    | rate_local4 <1.153 (p89) | 138.19 | 0.95 | 10.34 | 0.02 | 7.725E-05 |
| 271 | med_area_home >15.396 (p45)                                               | rate_local4 <0.295 (p29) | 46.19  | 0.37 | 9.64  | 0.08 | 7.299E-05 |
| 272 | build_area_pp >154.967 (p85)                                              | rate_local4 <0.254 (p24) | 18.13  | 0.51 | 9.60  | 0.27 | 6.704E-06 |
| 273 | prop_preprim_edu >0.143 (p88)                                             | rate_local4 <0.170 (p16) | 13.75  | 0.52 | 9.51  | 0.36 | 1.615E-08 |
| 274 | prop_higher_edu <0.167 (p35) &med_area_home >15.171 (p43)                 | rate_local4 <0.423 (p42) | 22.51  | 0.74 | 9.49  | 0.24 | 5.538E-05 |
| 275 | gender_ratio >87.527 (p11) &POI_den_transport <2117.352 (p88)             | rate_local4 <1.358 (p91) | 158.44 | 0.97 | 9.44  | 0.01 | 3.657E-05 |
| 276 | gender_ratio >87.319 (p11) &prop_private_resid <0.172 (p80)               | rate_local4 <1.248 (p90) | 141.62 | 0.96 | 9.39  | 0.02 | 5.141E-05 |
| 277 | prop_publicResid <0.054 (p72)                                             | rate_local4 <0.248 (p23) | 45.96  | 0.30 | 9.39  | 0.06 | 2.787E-05 |
| 278 | prop_open_recreation <0.006 (p25)                                         | rate_local4 <0.037 (p13) | 16.19  | 0.31 | 9.31  | 0.18 | 2.281E-06 |
| 279 | prop_higher_edu <0.167 (p35) &build_area_pp >69.457 (p52)                 | rate_local4 <0.423 (p42) | 20.64  | 0.74 | 8.69  | 0.24 | 7.052E-05 |
| 280 | gender_ratio >87.623 (p11) &prop_woodland >0.069 (p37)                    | rate_local4 <1.358 (p91) | 117.54 | 0.98 | 8.62  | 0.01 | 7.927E-05 |
| 281 | prop_household_3gen >0.080 (p92)                                          | rate_local4 <0.224 (p21) | 11.57  | 0.63 | 7.38  | 0.40 | 1.041E-07 |
| 282 | den_bldg <0.104 (p35) &prop_shrubland <0.145 (p67)                        | rate_local4 <0.391 (p39) | 13.44  | 0.70 | 5.89  | 0.17 | 4.552E-05 |
| 283 | gender_ratio <87.871 (p11) &den_population <8952.749 (p40)                | rate_local4 <0.040 (p13) | 6.73   | 0.86 | 5.71  | 0.53 | 8.126E-05 |
| 284 | med_income <15000.000 (p27) &med_area_home >15.497 (p45)                  | rate_local4 <0.050 (p13) | 6.71   | 0.44 | 4.72  | 0.25 | 7.584E-06 |
| 285 | gender_ratio <86.955 (p11) &prop_grassland >0.066 (p66)                   | rate_local4 <0.039 (p13) | 5.47   | 0.94 | 4.70  | 0.68 | 1.044E-05 |
| 286 | gender_ratio >87.319 (p11)                                                | rate_local4 <1.248 (p90) | 171.58 | 0.92 | 4.55  | 0.02 | 7.93E-05  |
| 287 | gender_ratio <86.981 (p11) &den_bldg <0.112 (p37)                         | rate_local4 <0.141 (p14) | 5.11   | 1.00 | 4.37  | 0.71 | 7.005E-05 |

(j) Rules for median waiting period; POI accessibility was used

| No. | Antecedent                                                                              | Consequent                               | Supp   | Conf | Lev   | Imp  | P        |
|-----|-----------------------------------------------------------------------------------------|------------------------------------------|--------|------|-------|------|----------|
| 1   | med_area_home >18.602 (p52)                                                             | med_waiting_period >4.392 (p67)          | 31.27  | 0.38 | 10.07 | 0.12 | 0.000202 |
| 2   | med_income >19680.813 (p60)                                                             | med_waiting_period >5.030 (p82)          | 17.80  | 0.27 | 7.39  | 0.11 | 0.000202 |
| 3   | build_area_pp >57.721 (p46)                                                             | med_waiting_period >5.317 (p82)          | 19.22  | 0.18 | 6.54  | 0.06 | 0.0002   |
| 4   | den_public_trans <3.053 (p17)                                                           | med_waiting_period >5.251 (p82)          | 10.79  | 0.29 | 6.50  | 0.18 | 0.000137 |
| 5   | gender_ratio >102.032 (p82)                                                             | med_waiting_period >5.276 (p82)          | 8.70   | 0.35 | 5.85  | 0.24 | 1.18E-05 |
| 6   | prop_open_recreation <0.008 (p24)                                                       | med_waiting_period >5.544 (p83)          | 10.99  | 0.22 | 5.64  | 0.11 | 0.000221 |
| 7   | prop_preprim_edu <0.065 (p7)                                                            | med_waiting_period >5.076 (p82)          | 6.58   | 0.47 | 4.52  | 0.32 | 0.000154 |
| 8   | prop_household_3gen >0.060 (p82) &den_population =11418.151-37853.952 (p35-61)          | med_waiting_period >5.250 (p82)          | 4.79   | 0.67 | 3.92  | 0.41 | 0.000196 |
| 9   | gender_ratio <88.232 (p12) &prop_transport <0.109 (p40)                                 | med_waiting_period >5.669 (p83)          | 2.73   | 0.61 | 2.27  | 0.45 | 0.000177 |
| 10  | gender_ratio <102.188 (p82) &build_area_pp <137.537 (p77)                               | med_waiting_period =3.497-5.221 (p26-82) | 104.86 | 0.70 | 18.16 | 0.05 | 9.99E-05 |
| 11  | gender_ratio <100.812 (p79) &prop_higher_edu <0.300 (p70) &build_area_pp <148.430 (p79) | med_waiting_period =2.993-5.300 (p5-82)  | 102.09 | 0.85 | 17.17 | 0.04 | 1.24E-05 |
| 12  | gender_ratio <102.255 (p82) &med_income <21279.411 (p70) &build_area_pp <160.924 (p81)  | med_waiting_period =2.965-5.099 (p5-82)  | 103.25 | 0.83 | 17.16 | 0.03 | 4.5E-06  |
| 13  | gender_ratio <102.242 (p82) &med_area_home <20.171 (p63)                                | med_waiting_period =3.663-5.258 (p30-82) | 83.75  | 0.69 | 16.91 | 0.05 | 0.000159 |
| 14  | med_area_home <17.835 (p51) &build_area_pp <162.989 (p81)                               | med_waiting_period =2.949-5.253 (p5-82)  | 91.84  | 0.89 | 16.85 | 0.01 | 4.15E-06 |
| 15  | med_area_home <18.602 (p52)                                                             | med_waiting_period =2.769-4.392 (p5-67)  | 95.05  | 0.82 | 15.51 | 0.13 | 1.34E-07 |
| 16  | den_population >41209.065 (p63)                                                         | med_waiting_period =3.734-4.292 (p30-67) | 40.95  | 0.64 | 15.41 | 0.24 | 1.48E-07 |
| 17  | gender_ratio <101.525 (p81) &den_population >38042.584 (p61)                            | med_waiting_period =3.753-5.345 (p30-82) | 51.39  | 0.79 | 15.39 | 0.03 | 5.99E-05 |
| 18  | med_income <20988.125 (p68) &med_area_home <18.979 (p54) &build_area_pp <137.247 (p77)  | med_waiting_period =2.987-5.260 (p5-82)  | 88.90  | 0.86 | 15.37 | 0.01 | 5.91E-05 |
| 19  | gender_ratio <102.307 (p82) &med_area_home <20.874 (p65) &build_area_pp <162.781 (p81)  | med_waiting_period =2.976-5.655 (p5-83)  | 102.55 | 0.86 | 15.32 | 0.02 | 0.00016  |
| 20  | build_area_pp <57.721 (p46)                                                             | med_waiting_period =3.840-5.317 (p30-82) | 67.27  | 0.72 | 15.23 | 0.16 | 2.18E-06 |
| 21  | med_income <20841.767 (p68) &build_area_pp <155.834 (p81)                               | med_waiting_period =2.935-4.660 (p5-72)  | 97.48  | 0.74 | 15.04 | 0.04 | 0.000236 |

|           |                                                                                              |                                          |        |      |       |      |          |
|-----------|----------------------------------------------------------------------------------------------|------------------------------------------|--------|------|-------|------|----------|
| <b>22</b> | prop_higher_edu <0.365 (p79) &med_income <21006.819 (p69) &build_area_pp <163.106 (p81)      | med_waiting_period =2.985-5.123 (p5-82)  | 106.06 | 0.80 | 14.99 | 0.00 | 0.000104 |
| <b>23</b> | gender_ratio <100.600 (p79) &med_income <30435.197 (p80)                                     | med_waiting_period =3.425-5.176 (p26-82) | 98.23  | 0.68 | 14.65 | 0.05 | 1.23E-05 |
| <b>24</b> | prop_higher_edu <0.297 (p69) &build_area_pp <150.096 (p79)                                   | med_waiting_period =2.993-5.300 (p5-82)  | 108.28 | 0.82 | 14.42 | 0.05 | 6.06E-06 |
| <b>25</b> | gender_ratio <101.408 (p80) &prop_household_3gen <0.064 (p84) &build_area_pp <179.586 (p83)  | med_waiting_period =2.944-5.225 (p5-82)  | 117.69 | 0.83 | 14.40 | 0.02 | 2.27E-05 |
| <b>26</b> | med_area_home <20.679 (p64) &den_population >15042.218 (p39) &build_area_pp <143.553 (p78)   | med_waiting_period =2.998-5.244 (p5-82)  | 81.12  | 0.86 | 14.37 | 0.03 | 1.18E-05 |
| <b>27</b> | prop_preprim_edu <0.143 (p84) &med_income <18372.979 (p56)                                   | med_waiting_period =2.965-5.190 (p5-82)  | 86.88  | 0.85 | 14.16 | 0.04 | 4.89E-05 |
| <b>28</b> | med_income <22638.607 (p72) &den_population >15042.218 (p39) &build_area_pp <143.553 (p78)   | med_waiting_period =2.998-5.244 (p5-82)  | 78.33  | 0.87 | 14.10 | 0.02 | 0.000117 |
| <b>29</b> | med_income <20507.105 (p68) &med_area_home <19.618 (p58)                                     | med_waiting_period =3.000-5.137 (p5-82)  | 90.67  | 0.81 | 13.96 | 0.03 | 9.72E-05 |
| <b>30</b> | gender_ratio <97.560 (p72) &prop_preprim_edu <0.131 (p79) &med_income <18372.979 (p56)       | med_waiting_period =2.993-5.300 (p5-82)  | 73.77  | 0.88 | 13.86 | 0.02 | 2.55E-05 |
| <b>31</b> | gender_ratio <97.711 (p72) &med_income <18919.315 (p57) &med_area_home <21.437 (p70)         | med_waiting_period =2.948-5.371 (p5-82)  | 84.60  | 0.87 | 13.49 | 0.01 | 0.000209 |
| <b>32</b> | gender_ratio <105.121 (p85) &prop_preprim_edu <0.129 (p79) &prop_higher_edu <0.285 (p67)     | med_waiting_period =2.931-5.353 (p5-82)  | 94.36  | 0.86 | 13.44 | 0.01 | 0.000183 |
| <b>33</b> | med_income <20696.281 (p68) &den_population >15042.218 (p39)                                 | med_waiting_period =2.979-5.242 (p5-82)  | 79.30  | 0.86 | 13.35 | 0.07 | 4.1E-07  |
| <b>34</b> | gender_ratio <103.325 (p83) &med_income <22645.700 (p72) &den_population >15364.577 (p39)    | med_waiting_period =2.969-5.368 (p5-82)  | 80.42  | 0.87 | 13.31 | 0.01 | 0.0002   |
| <b>35</b> | prop_preprim_edu <0.128 (p78) &prop_higher_edu <0.365 (p79) &med_income <21006.819 (p69)     | med_waiting_period =2.823-5.112 (p5-82)  | 104.79 | 0.91 | 13.19 | 0.00 | 4.6E-05  |
| <b>36</b> | med_income <21279.411 (p70) &build_area_pp <158.852 (p81) &prop_open_recreation >0.027 (p41) | med_waiting_period =2.965-5.099 (p5-82)  | 70.18  | 0.86 | 13.11 | 0.03 | 0.000229 |
| <b>37</b> | gender_ratio <104.531 (p83) &med_income <20891.100 (p68) &prop_grassland <0.039 (p58)        | med_waiting_period =2.562-5.081 (p5-82)  | 80.61  | 0.94 | 13.09 | 0.01 | 0.000242 |
| <b>38</b> | prop_higher_edu <0.275 (p64) &prop_open_recreation >0.027 (p41)                              | med_waiting_period =3.840-5.317 (p30-82) | 55.60  | 0.72 | 12.84 | 0.10 | 0.000122 |
| <b>39</b> | med_income <20729.622 (p68) &build_area_pp <164.775 (p81) &prop_agricultural <0.012 (p58)    | med_waiting_period =2.949-5.253 (p5-82)  | 70.48  | 0.89 | 12.81 | 0.03 | 0.000235 |

|    |                                                                                                 |                                         |       |      |       |      |          |
|----|-------------------------------------------------------------------------------------------------|-----------------------------------------|-------|------|-------|------|----------|
| 40 | gender_ratio <100.733 (p79) &prop_household_3gen <0.039 (p61)                                   | med_waiting_period =2.744-5.150 (p5-82) | 98.59 | 0.92 | 12.80 | 0.06 | 2.25E-06 |
| 41 | med_income <20891.100 (p68) &prop_grassland <0.039 (p58)                                        | med_waiting_period =2.562-5.081 (p5-82) | 82.15 | 0.93 | 12.78 | 0.08 | 2.55E-05 |
| 42 | prop_higher_edu <0.315 (p71) &den_population >16609.467 (p41) &build_area_pp <160.647 (p81)     | med_waiting_period =2.874-5.368 (p5-82) | 78.94 | 0.92 | 12.73 | 0.01 | 0.000173 |
| 43 | med_area_home <20.679 (p64) &den_population >15042.218 (p39)                                    | med_waiting_period =2.998-5.244 (p5-82) | 83.43 | 0.84 | 12.73 | 0.05 | 2.28E-05 |
| 44 | prop_higher_edu <0.355 (p78) &med_income <21006.819 (p69) &den_road >5.569 (p21)                | med_waiting_period =2.654-5.020 (p5-82) | 98.14 | 0.89 | 12.72 | 0.01 | 1.19E-05 |
| 45 | prop_preprim_edu <0.130 (p79) &prop_higher_edu <0.300 (p70)                                     | med_waiting_period =2.993-5.300 (p5-82) | 97.37 | 0.82 | 12.67 | 0.05 | 3.8E-05  |
| 46 | gender_ratio <98.273 (p73) &prop_higher_edu <0.348 (p77) &med_income <21698.571 (p70)           | med_waiting_period =2.993-5.328 (p5-82) | 97.73 | 0.82 | 12.59 | 0.00 | 0.00015  |
| 47 | prop_preprim_edu >0.076 (p14) &den_population >14982.236 (p39) &build_area_pp <139.950 (p78)    | med_waiting_period =2.957-5.374 (p5-82) | 80.92 | 0.86 | 12.56 | 0.02 | 4.73E-05 |
| 48 | gender_ratio <97.517 (p72) &med_area_home <20.101 (p63) &den_population >15060.055 (p39)        | med_waiting_period =3.000-5.504 (p5-83) | 74.66 | 0.86 | 12.55 | 0.02 | 0.000133 |
| 49 | prop_higher_edu <0.365 (p79) &med_income <21006.819 (p69) &prop_grassland <0.106 (p71)          | med_waiting_period =2.823-5.112 (p5-82) | 99.33 | 0.91 | 12.54 | 0.00 | 0.000222 |
| 50 | gender_ratio <98.716 (p74) &prop_household_3gen <0.051 (p79) &med_area_home <20.922 (p65)       | med_waiting_period =2.773-5.116 (p5-82) | 97.08 | 0.91 | 12.49 | 0.02 | 0.000165 |
| 51 | prop_higher_edu <0.316 (p72) &den_population >15042.218 (p39)                                   | med_waiting_period =2.998-5.244 (p5-82) | 77.34 | 0.85 | 12.47 | 0.06 | 6.31E-05 |
| 52 | gender_ratio <101.408 (p80) &prop_household_3gen <0.064 (p84) &den_population >14982.236 (p39)  | med_waiting_period =2.944-5.225 (p5-82) | 86.74 | 0.85 | 12.40 | 0.02 | 0.000138 |
| 53 | prop_higher_edu <0.344 (p76) &prop_household_3gen <0.064 (p84) &den_population >14982.236 (p39) | med_waiting_period =2.944-5.225 (p5-82) | 77.95 | 0.86 | 12.34 | 0.01 | 6.53E-05 |
| 54 | med_income <21006.819 (p69) &prop_transport >0.112 (p41)                                        | med_waiting_period =2.930-5.163 (p5-82) | 73.13 | 0.87 | 12.33 | 0.08 | 3.16E-05 |
| 55 | med_income <21006.819 (p69) &den_road >5.569 (p21)                                              | med_waiting_period =2.654-5.020 (p5-82) | 99.04 | 0.88 | 12.31 | 0.05 | 7.79E-06 |
| 56 | prop_higher_edu <0.340 (p75) &med_income <22901.777 (p72) &den_population >15847.175 (p40)      | med_waiting_period =2.542-5.535 (p5-83) | 87.86 | 0.96 | 12.07 | 0.01 | 0.000129 |
| 57 | gender_ratio <98.663 (p74) &prop_higher_edu <0.305 (p70)                                        | med_waiting_period =2.993-5.300 (p5-82) | 99.14 | 0.81 | 12.06 | 0.04 | 9.67E-05 |

|    |                                                                                            |                                          |        |      |       |      |          |
|----|--------------------------------------------------------------------------------------------|------------------------------------------|--------|------|-------|------|----------|
| 58 | prop_higher_edu <0.355 (p78) &med_area_home <20.923 (p65) &den_road >5.569 (p21)           | med_waiting_period =2.654-5.020 (p5-82)  | 96.31  | 0.88 | 11.91 | 0.02 | 9.05E-05 |
| 59 | gender_ratio <105.315 (p85) &den_population >19560.599 (p43) &build_area_pp <122.002 (p73) | med_waiting_period =2.921-5.465 (p5-82)  | 84.91  | 0.89 | 11.84 | 0.01 | 0.00016  |
| 60 | den_population >17331.400 (p42) &build_area_pp <143.553 (p78)                              | med_waiting_period =2.984-5.370 (p5-82)  | 85.16  | 0.83 | 11.76 | 0.03 | 0.000159 |
| 61 | med_income <21279.411 (p70) &prop_open_recreation >0.027 (p42)                             | med_waiting_period =2.989-5.416 (p5-82)  | 74.09  | 0.85 | 11.74 | 0.08 | 0.000106 |
| 62 | med_income <21163.180 (p69) &prop_agricultural <0.012 (p58)                                | med_waiting_period =2.949-5.253 (p5-82)  | 75.09  | 0.86 | 11.70 | 0.08 | 5.71E-05 |
| 63 | prop_higher_edu <0.289 (p67)                                                               | med_waiting_period =3.284-4.158 (p26-67) | 75.30  | 0.52 | 11.62 | 0.08 | 2.98E-05 |
| 64 | med_income <22670.905 (p72) &build_area_pp <121.123 (p72) &prop_rural_set <0.009 (p55)     | med_waiting_period =2.977-5.261 (p5-82)  | 61.22  | 0.88 | 11.61 | 0.05 | 0.000215 |
| 65 | prop_preprim_edu >0.076 (p14) &den_population >14982.236 (p39)                             | med_waiting_period =2.957-5.374 (p5-82)  | 84.77  | 0.85 | 11.59 | 0.04 | 2.48E-05 |
| 66 | med_income <21006.819 (p69) &den_public_trans >17.695 (p45)                                | med_waiting_period =2.771-5.133 (p5-82)  | 78.65  | 0.93 | 11.52 | 0.07 | 2.38E-05 |
| 67 | prop_higher_edu <0.353 (p78) &med_income <22901.777 (p72) &prop_transport >0.097 (p35)     | med_waiting_period =2.585-5.004 (p5-82)  | 82.05  | 0.90 | 11.45 | 0.00 | 8.34E-05 |
| 68 | gender_ratio <95.004 (p61) &med_income <21309.129 (p70) &prop_household_3gen <0.042 (p67)  | med_waiting_period =2.663-5.044 (p5-82)  | 70.65  | 0.92 | 11.14 | 0.04 | 0.000169 |
| 69 | med_income <19680.813 (p60)                                                                | med_waiting_period =2.999-5.030 (p5-82)  | 97.53  | 0.75 | 10.99 | 0.08 | 0.000144 |
| 70 | prop_higher_edu <0.312 (p71) &prop_transport >0.106 (p38)                                  | med_waiting_period =2.979-5.225 (p5-82)  | 72.25  | 0.84 | 10.76 | 0.07 | 0.000106 |
| 71 | gender_ratio <97.609 (p72) &prop_higher_edu <0.315 (p71) &den_population >16609.467 (p41)  | med_waiting_period =2.808-5.534 (p5-83)  | 74.96  | 0.98 | 10.68 | 0.01 | 6.17E-05 |
| 72 | prop_higher_edu <0.302 (p70) &prop_grassland <0.063 (p63)                                  | med_waiting_period =2.941-5.368 (p5-82)  | 81.40  | 0.85 | 10.63 | 0.06 | 9.24E-05 |
| 73 | med_area_home <20.923 (p65) &den_road >5.569 (p21)                                         | med_waiting_period =2.654-5.020 (p5-82)  | 101.66 | 0.86 | 10.53 | 0.03 | 0.000121 |
| 74 | med_income <19701.735 (p60) &prop_publicResid >0.033 (p61)                                 | med_waiting_period =2.995-5.251 (p5-82)  | 57.49  | 0.87 | 10.47 | 0.03 | 0.000247 |
| 75 | prop_preprim_edu >0.075 (p14) &den_public_trans >17.478 (p45)                              | med_waiting_period =2.737-5.211 (p5-82)  | 83.88  | 0.91 | 10.44 | 0.05 | 1.13E-05 |

|           |                                                                                             |                                          |        |      |       |      |          |
|-----------|---------------------------------------------------------------------------------------------|------------------------------------------|--------|------|-------|------|----------|
| <b>76</b> | med_area_home <21.618 (p71) &prop_transport >0.096 (p34)                                    | med_waiting_period =2.974-5.233 (p5-82)  | 82.57  | 0.82 | 10.36 | 0.05 | 0.00022  |
| <b>77</b> | prop_higher_edu <0.285 (p67) &prop_publicResid >0.033 (p61)                                 | med_waiting_period =2.931-5.353 (p5-82)  | 59.24  | 0.90 | 10.27 | 0.03 | 5.38E-05 |
| <b>78</b> | prop_household_3gen <0.038 (p61) &build_area_pp <173.428 (p82)                              | med_waiting_period =2.747-5.137 (p5-82)  | 102.41 | 0.89 | 10.13 | 0.03 | 0.000232 |
| <b>79</b> | prop_higher_edu <0.305 (p70) &den_road >5.864 (p22)                                         | med_waiting_period =2.648-5.044 (p5-82)  | 94.77  | 0.87 | 10.13 | 0.05 | 6.56E-05 |
| <b>80</b> | gender_ratio <96.126 (p67) &prop_preprim_edu >0.078 (p15) &prop_household_3gen <0.037 (p56) | med_waiting_period =2.931-5.353 (p5-82)  | 61.42  | 0.89 | 10.07 | 0.02 | 0.000227 |
| <b>81</b> | prop_preprim_edu >0.075 (p14) &den_public_trans >17.478 (p45) &build_area_pp <115.172 (p71) | med_waiting_period =2.737-5.211 (p5-82)  | 72.96  | 0.93 | 10.06 | 0.01 | 7.18E-05 |
| <b>82</b> | med_area_home <20.754 (p64) &prop_publicResid >0.034 (p62)                                  | med_waiting_period =2.857-5.380 (p5-82)  | 63.15  | 0.93 | 9.85  | 0.02 | 0.000196 |
| <b>83</b> | prop_preprim_edu >0.077 (p15) &prop_publicResid >0.033 (p61)                                | med_waiting_period =2.931-5.353 (p5-82)  | 58.66  | 0.89 | 9.71  | 0.02 | 6.06E-05 |
| <b>84</b> | prop_preprim_edu >0.077 (p15) &prop_agricultural <0.012 (p58)                               | med_waiting_period =2.793-5.327 (p5-82)  | 90.42  | 0.91 | 9.66  | 0.07 | 0.000201 |
| <b>85</b> | prop_preprim_edu >0.079 (p15) &prop_transport >0.079 (p30)                                  | med_waiting_period =2.731-5.219 (p5-82)  | 94.75  | 0.89 | 9.64  | 0.06 | 0.000196 |
| <b>86</b> | gender_ratio <102.032 (p82)                                                                 | med_waiting_period =3.525-5.276 (p30-82) | 109.15 | 0.63 | 9.18  | 0.05 | 8.93E-05 |
| <b>87</b> | prop_publicResid >0.039 (p62)                                                               | med_waiting_period =2.992-5.317 (p5-82)  | 56.16  | 0.85 | 8.95  | 0.14 | 6.52E-05 |
| <b>88</b> | prop_preprim_edu >0.089 (p31) &prop_grassland <0.060 (p62)                                  | med_waiting_period =2.744-5.004 (p5-82)  | 70.15  | 0.86 | 7.50  | 0.07 | 0.000123 |
| <b>89</b> | prop_household_3gen >0.057 (p81)                                                            | med_waiting_period =5.125-6.524 (p82-87) | 7.04   | 0.29 | 3.87  | 0.16 | 9.16E-06 |
| <b>90</b> | den_population =8798.848-38778.099 (p32-62) &den_public_trans >27.062 (p52)                 | med_waiting_period <3.731 (p30)          | 15.80  | 0.59 | 7.06  | 0.18 | 8.27E-05 |
| <b>91</b> | med_area_home >18.602 (p52)                                                                 | med_waiting_period <2.769 (p5)           | 10.67  | 0.13 | 5.36  | 0.06 | 0.000213 |



**(k) Rules for average waiting period; POI accessibility was used**

| No. | Antecedent                                                                                     | Consequent                                  | Supp  | Conf | Lev  | Imp  | P         |
|-----|------------------------------------------------------------------------------------------------|---------------------------------------------|-------|------|------|------|-----------|
| 1   | POI_pp_transport >39.683 (p60)                                                                 | ave_waiting_period >5.790 (p75)             | 22.98 | 0.34 | 9.81 | 0.14 | 6.655E-05 |
| 2   | POI_pp_telecom_elec >15.395 (p57)                                                              | ave_waiting_period >5.765 (p74)             | 24.76 | 0.33 | 9.65 | 0.13 | 7.16E-05  |
| 3   | POI_pp_mall_mkt >8.676 (p64)                                                                   | ave_waiting_period >5.822 (p75)             | 20.26 | 0.33 | 8.90 | 0.14 | 0.0001032 |
| 4   | med_area_home >17.644 (p50)                                                                    | ave_waiting_period >5.807 (p75)             | 26.33 | 0.29 | 8.89 | 0.10 | 1.144E-05 |
| 5   | med_income >19979.413 (p60)                                                                    | ave_waiting_period >5.751 (p74)             | 21.18 | 0.33 | 8.39 | 0.13 | 9.479E-05 |
| 6   | POI_pp_sports >29.352 (p65)                                                                    | ave_waiting_period >6.163 (p81)             | 16.16 | 0.27 | 8.26 | 0.14 | 1.534E-07 |
| 7   | POI_pp_edu >14.015 (p63)                                                                       | ave_waiting_period >5.788 (p75)             | 20.68 | 0.31 | 7.75 | 0.12 | 0.0001774 |
| 8   | prop_over65 <0.099 (p7)                                                                        | ave_waiting_period >5.508 (p69)             | 10.2  | 0.71 | 6.6  | 0.46 | 5.042E-05 |
| 9   | den_public_trans <2.671 (p16)                                                                  | ave_waiting_period >6.179 (p81)             | 11.0  | 0.31 | 6.6  | 0.19 | 0.0001147 |
| 10  | prop_higher_edu >0.351 (p78)                                                                   | ave_waiting_period >5.750 (p74)             | 12.9  | 0.39 | 6.2  | 0.18 | 0.0001866 |
| 11  | prop_over65 <0.114 (p14) &prop_gov_insti_faci <0.027 (p31)                                     | ave_waiting_period >5.506 (p69)             | 9.4   | 0.70 | 6.0  | 0.25 | 0.0001759 |
| 12  | prop_higher_edu >0.344 (p75) &prop_publicResid =0.009-0.072 (p53-69)                           | ave_waiting_period >5.720 (p74)             | 7.3   | 0.96 | 5.7  | 0.55 | 0.0001092 |
| 13  | gender_ratio >102.339 (p82)                                                                    | ave_waiting_period >5.720 (p74)             | 10.2  | 0.43 | 5.3  | 0.22 | 0.0002224 |
| 14  | med_income >21927.588 (p70) &prop_publicResid =0.010-0.078 (p53-70)                            | ave_waiting_period >5.899 (p77)             | 5.2   | 0.69 | 3.9  | 0.40 | 0.0001353 |
| 15  | med_area_home >22.579 (p75) &prop_publicResid =0.011-0.091 (p54-73)                            | ave_waiting_period >5.895 (p77)             | 4.0   | 1.00 | 3.3  | 0.76 | 0.0001875 |
| 16  | prop_preprim_edu <0.132 (p79) &med_area_home <18.769 (p53)<br>&POI_pp_mall_mkt <10.185 (p70)   | ave_waiting_period =4.142-5.588<br>(p24-71) | 67.4  | 0.76 | 23.1 | 0.05 | 7.493E-05 |
| 17  | gender_ratio <101.246 (p80) &med_area_home <18.533 (p52)<br>&POI_pp_mall_mkt <10.746 (p72)     | ave_waiting_period =4.082-5.672<br>(p22-72) | 74.3  | 0.78 | 23.0 | 0.03 | 0.0002124 |
| 18  | gender_ratio <101.246 (p80) &med_area_home <18.381 (p51)<br>&POI_pp_telecom_elec <18.589 (p65) | ave_waiting_period =3.754-5.828<br>(p16-75) | 83.1  | 0.88 | 23.0 | 0.02 | 1.404E-05 |
| 19  | build_area_pp <76.920 (p54) &POI_pp_transport <27.446 (p50)                                    | ave_waiting_period =4.522-6.179<br>(p40-81) | 59.0  | 0.72 | 22.8 | 0.10 | 3.021E-05 |
| 20  | med_area_home <19.444 (p57) &POI_pp_telecom_elec <15.554 (p57)                                 | ave_waiting_period =4.116-5.839<br>(p23-76) | 76.6  | 0.80 | 22.6 | 0.09 | 1.939E-05 |
| 21  | gender_ratio <101.187 (p80) &med_area_home <18.325 (p51)<br>&POI_pp_transport <49.039 (p69)    | ave_waiting_period =3.801-5.674<br>(p16-72) | 79.3  | 0.83 | 22.1 | 0.02 | 0.0001352 |
| 22  | med_area_home <18.586 (p52) &build_area_pp <85.357 (p57)                                       | ave_waiting_period =4.097-5.822<br>(p22-75) | 73.6  | 0.81 | 22.1 | 0.07 | 0.0001032 |
| 23  | med_area_home <18.586 (p52) &POI_pp_sports <29.583 (p65)                                       | ave_waiting_period =4.097-5.822<br>(p22-75) | 76.7  | 0.80 | 22.0 | 0.06 | 0.0001595 |

|    |                                                                                                |                                          |      |      |      |      |           |
|----|------------------------------------------------------------------------------------------------|------------------------------------------|------|------|------|------|-----------|
| 24 | med_area_home <19.338 (p57) &POI_pp_transport <35.640 (p56)                                    | ave_waiting_period =4.146-5.838 (p24-76) | 73.4 | 0.79 | 21.9 | 0.09 | 4.352E-05 |
| 25 | gender_ratio <101.136 (p80) &prop_preprim_edu <0.131 (p79) &POI_pp_sports <26.199 (p63)        | ave_waiting_period =3.627-5.895 (p14-77) | 98.6 | 0.87 | 21.8 | 0.02 | 0.0001209 |
| 26 | build_area_pp <76.052 (p53) &POI_pp_mall_mkt <5.418 (p50)                                      | ave_waiting_period =4.522-6.179 (p40-81) | 57.8 | 0.71 | 21.8 | 0.11 | 9.808E-06 |
| 27 | gender_ratio <101.246 (p80) &med_area_home <19.086 (p56)                                       | ave_waiting_period =3.754-5.828 (p16-75) | 92.1 | 0.83 | 21.8 | 0.04 | 7.792E-07 |
| 28 | prop_over65 <0.184 (p69) &gender_ratio <98.915 (p74) &med_area_home <19.448 (p57)              | ave_waiting_period =4.001-5.761 (p22-74) | 65.4 | 0.86 | 21.7 | 0.07 | 4.203E-06 |
| 29 | prop_preprim_edu <0.124 (p77) &prop_higher_edu <0.360 (p78) &POI_pp_telecom_elec <19.306 (p65) | ave_waiting_period =4.083-5.914 (p22-77) | 85.7 | 0.78 | 21.5 | 0.04 | 5.302E-05 |
| 30 | prop_preprim_edu <0.136 (p81) &med_income <19568.062 (p60) &POI_pp_telecom_elec <19.371 (p65)  | ave_waiting_period =4.119-5.872 (p23-76) | 75.3 | 0.80 | 21.2 | 0.04 | 0.0001229 |
| 31 | prop_preprim_edu <0.131 (p79) &med_area_home <18.042 (p51) &POI_pp_sports <26.199 (p63)        | ave_waiting_period =4.158-5.591 (p25-71) | 61.5 | 0.75 | 21.1 | 0.04 | 0.0002291 |
| 32 | gender_ratio <101.698 (p81) &prop_higher_edu <0.355 (p78) &med_area_home <19.914 (p61)         | ave_waiting_period =3.825-5.877 (p16-77) | 93.4 | 0.82 | 21.0 | 0.01 | 8.77E-05  |
| 33 | build_area_pp <70.173 (p52) &POI_pp_edu <9.364 (p50)                                           | ave_waiting_period =4.522-6.179 (p40-81) | 55.2 | 0.71 | 21.0 | 0.11 | 3.614E-05 |
| 34 | gender_ratio <100.126 (p79) &med_income <20155.135 (p68) &POI_pp_telecom_elec <12.529 (p50)    | ave_waiting_period =4.099-5.873 (p22-76) | 67.3 | 0.84 | 20.9 | 0.03 | 0.0001119 |
| 35 | gender_ratio <101.246 (p80) &prop_preprim_edu <0.128 (p79) &med_income <22728.923 (p72)        | ave_waiting_period =3.754-5.828 (p16-75) | 93.1 | 0.82 | 20.9 | 0.04 | 0.0002417 |
| 36 | prop_over65 <0.184 (p69) &med_area_home <19.338 (p57) &POI_pp_telecom_elec <18.675 (p65)       | ave_waiting_period =4.001-5.761 (p22-74) | 64.0 | 0.85 | 20.9 | 0.06 | 9.959E-05 |
| 37 | med_area_home <19.914 (p61) &POI_pp_mall_mkt <10.111 (p69)                                     | ave_waiting_period =4.037-5.725 (p22-74) | 80.9 | 0.75 | 20.9 | 0.07 | 0.0001365 |
| 38 | prop_preprim_edu <0.125 (p77) &med_income <19096.021 (p58) &POI_pp_mall_mkt <10.359 (p70)      | ave_waiting_period =4.148-5.622 (p24-71) | 63.7 | 0.75 | 20.8 | 0.05 | 0.0001529 |
| 39 | gender_ratio <101.386 (p80) &prop_preprim_edu <0.138 (p81) &POI_pp_telecom_elec <15.153 (p57)  | ave_waiting_period =3.608-5.942 (p14-78) | 95.7 | 0.88 | 20.7 | 0.02 | 7.052E-05 |
| 40 | prop_over65 <0.207 (p82) &gender_ratio <98.783 (p74) &med_income <19568.062 (p60)              | ave_waiting_period =4.015-5.776 (p22-74) | 73.3 | 0.79 | 20.5 | 0.06 | 0.0001903 |
| 41 | gender_ratio <100.607 (p79) &med_area_home <19.338 (p57) &POI_pp_edu <20.523 (p74)             | ave_waiting_period =3.799-6.109 (p16-81) | 89.5 | 0.88 | 20.4 | 0.03 | 0.0001358 |

|    |                                                                                            |                                          |       |      |      |      |           |
|----|--------------------------------------------------------------------------------------------|------------------------------------------|-------|------|------|------|-----------|
| 42 | prop_preprim_edu <0.137 (p81) &prop_higher_edu <0.360 (p78) &POI_pp_sports <23.041 (p58)   | ave_waiting_period =4.083-5.920 (p22-77) | 80.9  | 0.79 | 20.4 | 0.03 | 0.0001199 |
| 43 | gender_ratio <98.227 (p73) &build_area_pp <151.826 (p80) &POI_pp_edu <19.179 (p72)         | ave_waiting_period =4.106-5.861 (p23-76) | 86.4  | 0.75 | 20.3 | 0.05 | 0.0002449 |
| 44 | gender_ratio <102.327 (p82) &med_income <19349.019 (p58) &build_area_pp <139.103 (p78)     | ave_waiting_period =4.115-5.891 (p23-77) | 80.9  | 0.77 | 20.3 | 0.04 | 0.0001412 |
| 45 | gender_ratio <101.386 (p80) &prop_preprim_edu <0.136 (p81) &POI_pp_mall_mkt <8.764 (p64)   | ave_waiting_period =3.608-5.942 (p14-78) | 99.8  | 0.87 | 20.2 | 0.02 | 7.367E-05 |
| 46 | gender_ratio <101.386 (p80) &prop_preprim_edu <0.136 (p81) &POI_pp_transport <35.602 (p56) | ave_waiting_period =3.608-5.942 (p14-78) | 93.4  | 0.88 | 20.1 | 0.02 | 2.543E-05 |
| 47 | prop_preprim_edu <0.124 (p77) &POI_pp_mall_mkt <9.862 (p67)                                | ave_waiting_period =3.611-5.939 (p14-78) | 102.0 | 0.85 | 20.0 | 0.07 | 3.769E-07 |
| 48 | med_area_home <19.338 (p57) &POI_pp_edu <20.523 (p74)                                      | ave_waiting_period =3.999-5.827 (p20-75) | 83.3  | 0.77 | 19.8 | 0.04 | 0.000222  |
| 49 | prop_preprim_edu <0.134 (p80) &POI_pp_transport <40.374 (p62)                              | ave_waiting_period =3.611-5.939 (p14-78) | 100.4 | 0.86 | 19.8 | 0.04 | 0.0001354 |
| 50 | prop_preprim_edu <0.128 (p79) &med_income <19994.590 (p60) &build_area_pp <142.936 (p78)   | ave_waiting_period =4.177-5.826 (p25-75) | 72.9  | 0.74 | 19.7 | 0.04 | 7.151E-05 |
| 51 | prop_preprim_edu <0.121 (p75) &med_income <19349.019 (p58) &POI_pp_edu <20.242 (p73)       | ave_waiting_period =4.097-5.822 (p22-75) | 68.9  | 0.80 | 19.7 | 0.04 | 5.974E-05 |
| 52 | prop_over65 <0.179 (p65) &med_area_home <17.509 (p50)                                      | ave_waiting_period =4.034-5.792 (p22-75) | 59.7  | 0.85 | 19.7 | 0.10 | 2.691E-05 |
| 53 | gender_ratio <102.594 (p82) &prop_higher_edu <0.293 (p69) &build_area_pp <140.696 (p78)    | ave_waiting_period =4.117-5.849 (p23-76) | 85.1  | 0.74 | 19.6 | 0.04 | 0.0002139 |
| 54 | prop_preprim_edu <0.126 (p78) &POI_pp_telecom_elec <19.306 (p65)                           | ave_waiting_period =3.611-5.939 (p14-78) | 104.5 | 0.84 | 19.5 | 0.03 | 0.000211  |
| 55 | gender_ratio <101.386 (p80) &POI_pp_telecom_elec <12.570 (p50)                             | ave_waiting_period =3.608-5.942 (p14-78) | 91.6  | 0.88 | 19.5 | 0.02 | 2.31E-06  |
| 56 | prop_preprim_edu <0.137 (p81) &med_area_home <18.543 (p52)                                 | ave_waiting_period =4.119-5.872 (p23-76) | 80.4  | 0.75 | 19.5 | 0.03 | 0.0001647 |
| 57 | prop_preprim_edu <0.137 (p81) &POI_pp_sports <23.041 (p58)                                 | ave_waiting_period =4.158-5.571 (p25-70) | 74.9  | 0.66 | 19.3 | 0.04 | 0.0002297 |
| 58 | build_area_pp <77.760 (p54) &POI_pp_telecom_elec <12.658 (p50)                             | ave_waiting_period =4.463-6.255 (p36-82) | 60.3  | 0.72 | 19.3 | 0.09 | 0.0002241 |
| 59 | prop_preprim_edu <0.137 (p81) &med_area_home <21.280 (p70) &POI_pp_edu <21.599 (p76)       | ave_waiting_period =4.119-5.872 (p23-76) | 85.6  | 0.74 | 19.3 | 0.04 | 0.000199  |

|                                                                                                     |                                          |       |      |      |      |           |
|-----------------------------------------------------------------------------------------------------|------------------------------------------|-------|------|------|------|-----------|
| <b>60</b> POI_pp_sports <11.624 (p40)                                                               | ave_waiting_period =4.517-6.163 (p40-81) | 56.2  | 0.67 | 19.3 | 0.23 | 1.956E-09 |
| <b>61</b> gender_ratio <101.136 (p80) &POI_pp_sports <26.199 (p63)                                  | ave_waiting_period =3.587-6.044 (p13-80) | 107.0 | 0.86 | 19.0 | 0.03 | 9.064E-05 |
| <b>62</b> prop_higher_edu <0.354 (p78) &POI_pp_telecom_elec <17.856 (p63)                           | ave_waiting_period =3.950-5.917 (p20-77) | 93.0  | 0.78 | 19.0 | 0.03 | 3.467E-05 |
| <b>63</b> build_area_pp <81.717 (p55) &POI_pp_sports <16.987 (p50)                                  | ave_waiting_period =4.489-6.252 (p37-82) | 57.8  | 0.70 | 19.0 | 0.08 | 8.432E-05 |
| <b>64</b> gender_ratio <102.331 (p82) &prop_preprim_edu <0.124 (p77) &prop_higher_edu <0.360 (p78)  | ave_waiting_period =4.083-5.914 (p22-77) | 92.5  | 0.74 | 19.0 | 0.03 | 0.0002457 |
| <b>65</b> prop_preprim_edu <0.127 (p78) &med_income <19096.021 (p58)                                | ave_waiting_period =4.148-5.622 (p24-71) | 69.4  | 0.70 | 18.9 | 0.09 | 0.0002132 |
| <b>66</b> gender_ratio <101.407 (p80) &build_area_pp <151.678 (p80) &POI_pp_transport <50.379 (p70) | ave_waiting_period =3.639-5.816 (p14-75) | 101.2 | 0.81 | 18.8 | 0.02 | 0.0001082 |
| <b>67</b> gender_ratio <99.654 (p77) &med_income <18510.449 (p57)                                   | ave_waiting_period =3.892-5.810 (p19-75) | 81.8  | 0.78 | 18.8 | 0.06 | 8.888E-05 |
| <b>68</b> prop_preprim_edu <0.140 (p82) &build_area_pp <141.705 (p78) &POI_pp_edu <18.548 (p71)     | ave_waiting_period =3.611-5.939 (p14-78) | 100.6 | 0.84 | 18.8 | 0.03 | 9.595E-05 |
| <b>69</b> prop_preprim_edu <0.126 (p78) &POI_pp_edu <17.144 (p68)                                   | ave_waiting_period =3.611-5.939 (p14-78) | 104.2 | 0.84 | 18.6 | 0.05 | 1.849E-05 |
| <b>70</b> POI_pp_telecom_elec <15.395 (p57)                                                         | ave_waiting_period =3.650-5.765 (p14-74) | 97.7  | 0.80 | 18.4 | 0.15 | 3.654E-11 |
| <b>71</b> gender_ratio <102.296 (p82) &POI_pp_transport <31.274 (p52)                               | ave_waiting_period =3.642-6.079 (p14-81) | 94.9  | 0.87 | 18.4 | 0.02 | 4.147E-05 |
| <b>72</b> prop_preprim_edu <0.124 (p77) &prop_higher_edu <0.302 (p70)                               | ave_waiting_period =4.081-5.450 (p22-68) | 74.8  | 0.65 | 18.3 | 0.09 | 1.07E-05  |
| <b>73</b> med_area_home <17.644 (p50)                                                               | ave_waiting_period =4.102-5.807 (p23-75) | 77.6  | 0.72 | 18.2 | 0.17 | 1.443E-11 |
| <b>74</b> prop_higher_edu <0.356 (p78) &med_area_home <19.914 (p61)                                 | ave_waiting_period =3.825-5.877 (p16-77) | 96.3  | 0.78 | 18.1 | 0.02 | 0.0001507 |
| <b>75</b> den_population >19400.293 (p43) &POI_pp_mall_mkt <5.588 (p51)                             | ave_waiting_period =4.526-6.160 (p40-81) | 47.4  | 0.71 | 18.1 | 0.12 | 0.0001115 |
| <b>76</b> med_income <19588.403 (p60) &build_area_pp <126.455 (p75)                                 | ave_waiting_period =4.069-5.628 (p22-71) | 75.4  | 0.69 | 17.5 | 0.07 | 0.0001283 |
| <b>77</b> gender_ratio <101.386 (p80) &POI_pp_mall_mkt <8.976 (p65)                                 | ave_waiting_period =3.608-5.942 (p14-78) | 106.3 | 0.83 | 17.5 | 0.03 | 6.824E-05 |

|                                                                                                    |                                          |       |      |      |      |           |
|----------------------------------------------------------------------------------------------------|------------------------------------------|-------|------|------|------|-----------|
| <b>78</b> med_income <19509.546 (p60) &prop_transport >0.068 (p29)                                 | ave_waiting_period =4.071-5.970 (p22-78) | 74.2  | 0.78 | 17.5 | 0.10 | 3.684E-05 |
| <b>79</b> prop_higher_edu <0.293 (p69) &den_population >18412.543 (p43)                            | ave_waiting_period =4.117-5.849 (p23-76) | 63.8  | 0.78 | 17.5 | 0.08 | 0.0001523 |
| <b>80</b> med_income <19568.062 (p60) &POI_pp_transport <29.494 (p51)                              | ave_waiting_period =4.119-5.872 (p23-76) | 64.7  | 0.78 | 17.5 | 0.06 | 0.0001698 |
| <b>81</b> build_area_pp <59.911 (p49) &prop_gov_insti_faci >0.027 (p31)                            | ave_waiting_period =4.174-5.857 (p25-76) | 58.5  | 0.77 | 17.4 | 0.08 | 0.000101  |
| <b>82</b> prop_over65 <0.207 (p82) &med_income <19568.062 (p60) &prop_open_recreation >0.027 (p41) | ave_waiting_period =4.096-5.905 (p22-77) | 57.7  | 0.83 | 17.2 | 0.05 | 0.0001196 |
| <b>83</b> POI_pp_transport <39.683 (p60)                                                           | ave_waiting_period =3.633-5.790 (p14-75) | 102.4 | 0.79 | 17.1 | 0.13 | 1.298E-09 |
| <b>84</b> prop_gov_insti_faci >0.028 (p31) &POI_pp_mall_mkt <8.762 (p64)                           | ave_waiting_period =4.177-5.826 (p25-75) | 67.8  | 0.72 | 17.1 | 0.09 | 3.756E-05 |
| <b>85</b> gender_ratio <103.079 (p83) &POI_pp_sports <30.800 (p67) &POI_pp_transport <31.274 (p52) | ave_waiting_period =3.399-6.268 (p9-82)  | 100.4 | 0.93 | 16.9 | 0.00 | 3.149E-05 |
| <b>86</b> gender_ratio <96.204 (p67) &POI_pp_edu <19.100 (p72)                                     | ave_waiting_period =4.089-5.878 (p22-77) | 84.8  | 0.72 | 16.8 | 0.07 | 0.0001529 |
| <b>87</b> prop_transport >0.079 (p30) &POI_pp_mall_mkt <10.478 (p71)                               | ave_waiting_period =4.039-5.936 (p22-78) | 76.7  | 0.76 | 16.7 | 0.09 | 4.933E-05 |
| <b>88</b> med_income <18877.334 (p57) &prop_open_recreation >0.028 (p43)                           | ave_waiting_period =4.039-6.004 (p22-80) | 63.0  | 0.82 | 16.6 | 0.12 | 8.371E-06 |
| <b>89</b> prop_higher_edu <0.302 (p70) &prop_transport >0.086 (p32)                                | ave_waiting_period =4.078-5.915 (p22-77) | 70.9  | 0.77 | 16.5 | 0.10 | 6.928E-06 |
| <b>90</b> gender_ratio <101.724 (p81) &den_population >25055.300 (p49)                             | ave_waiting_period =4.117-5.849 (p23-76) | 65.9  | 0.75 | 16.3 | 0.03 | 0.0002242 |
| <b>91</b> build_area_pp <77.130 (p54)                                                              | ave_waiting_period =4.526-6.160 (p40-81) | 67.0  | 0.58 | 16.3 | 0.14 | 5.406E-07 |
| <b>92</b> prop_preprim_edu <0.143 (p85) &POI_pp_edu <14.015 (p63) &POI_pp_transport <15.096 (p35)  | ave_waiting_period =3.631-6.100 (p14-81) | 66.1  | 0.93 | 15.9 | 0.00 | 8.233E-05 |
| <b>93</b> POI_pp_edu <12.794 (p58) &POI_pp_transport <15.096 (p35)                                 | ave_waiting_period =3.631-6.100 (p14-81) | 67.5  | 0.92 | 15.7 | 0.01 | 8.436E-06 |
| <b>94</b> gender_ratio <101.407 (p80) &build_area_pp <151.678 (p80)                                | ave_waiting_period =4.008-5.745 (p22-74) | 97.4  | 0.66 | 15.4 | 0.04 | 3.101E-05 |
| <b>95</b> med_income <20215.433 (p68) &prop_gov_insti_faci >0.027 (p31)                            | ave_waiting_period =4.174-5.857 (p25-76) | 64.7  | 0.70 | 15.0 | 0.08 | 0.0001548 |

|                                                                                     |                                          |       |      |      |      |           |
|-------------------------------------------------------------------------------------|------------------------------------------|-------|------|------|------|-----------|
| <b>96</b> POI_pp_mall_mkt <2.416 (p28)                                              | ave_waiting_period =4.401-5.822 (p34-75) | 41.2  | 0.72 | 15.0 | 0.26 | 2.638E-07 |
| <b>97</b> gender_ratio <101.661 (p81) &prop_higher_edu <0.332 (p73)                 | ave_waiting_period =3.825-5.877 (p16-77) | 104.7 | 0.74 | 14.9 | 0.05 | 0.0002342 |
| <b>98</b> prop_publicResid >0.048 (p64) &POI_pp_mall_mkt <9.418 (p65)               | ave_waiting_period =4.033-6.072 (p22-81) | 48.9  | 0.87 | 14.7 | 0.04 | 3.573E-05 |
| <b>99</b> prop_higher_edu <0.219 (p51) &prop_open_recreation >0.027 (p41)           | ave_waiting_period =4.102-5.890 (p23-77) | 51.0  | 0.81 | 14.4 | 0.15 | 8.691E-06 |
| <b>100</b> POI_pp_edu <14.015 (p63)                                                 | ave_waiting_period =3.640-5.788 (p14-75) | 99.9  | 0.77 | 14.1 | 0.11 | 3.847E-09 |
| <b>101</b> prop_publicResid >0.053 (p65)                                            | ave_waiting_period =4.097-5.657 (p22-72) | 45.0  | 0.76 | 13.7 | 0.23 | 1.57E-06  |
| <b>102</b> den_population >39592.585 (p62)                                          | ave_waiting_period =4.075-5.980 (p22-78) | 52.3  | 0.79 | 13.5 | 0.20 | 1.659E-05 |
| <b>103</b> med_income <19979.413 (p60)                                              | ave_waiting_period =3.689-5.751 (p15-74) | 96.8  | 0.72 | 11.5 | 0.09 | 9.251E-06 |
| <b>104</b> prop_gov_insti_faci >0.028 (p31)                                         | ave_waiting_period =4.177-5.826 (p25-75) | 80.7  | 0.62 | 11.0 | 0.09 | 1.855E-05 |
| <b>105</b> prop_preprim_edu <0.125 (p77)                                            | ave_waiting_period =4.148-5.622 (p24-71) | 93.0  | 0.56 | 9.5  | 0.06 | 0.0001761 |
| <b>106</b> gender_ratio <102.339 (p82)                                              | ave_waiting_period =3.686-5.720 (p15-74) | 119.1 | 0.68 | 9.3  | 0.05 | 2.591E-06 |
| <b>107</b> prop_higher_edu <0.351 (p78)                                             | ave_waiting_period =3.724-5.750 (p15-74) | 112.0 | 0.68 | 8.4  | 0.05 | 2.264E-05 |
| <b>108</b> build_area_pp >77.760 (p54) &POI_pp_telecom_elec <12.658 (p50)           | ave_waiting_period =3.736-4.463 (p15-36) | 12.5  | 0.49 | 6.8  | 0.24 | 1.595E-05 |
| <b>109</b> POI_pp_sports =14.823-29.352 (p46-65)                                    | ave_waiting_period =4.058-4.517 (p22-40) | 13.6  | 0.34 | 6.1  | 0.15 | 4.769E-05 |
| <b>110</b> build_area_pp >81.717 (p55) &POI_pp_sports <16.987 (p50)                 | ave_waiting_period =3.711-4.489 (p15-37) | 9.9   | 0.48 | 4.9  | 0.20 | 0.0001676 |
| <b>111</b> prop_gov_insti_faci <0.028 (p31)                                         | ave_waiting_period =3.992-4.177 (p20-25) | 7.0   | 0.10 | 3.4  | 0.05 | 0.000185  |
| <b>112</b> den_population =6601.148-27429.878 (p30-53) &prop_transport <0.064 (p28) | ave_waiting_period =4.658-5.633 (p45-71) | 4.5   | 0.57 | 2.3  | 0.29 | 0.0001078 |
| <b>113</b> build_area_pp >77.130 (p54)                                              | ave_waiting_period <4.113 (p23)          | 32.6  | 0.39 | 11.4 | 0.14 | 7.052E-06 |
| <b>114</b> prop_publicResid <0.006 (p50)                                            | ave_waiting_period <4.097 (p22)          | 37.7  | 0.35 | 10.7 | 0.10 | 8.287E-05 |

|                                                                      |                                 |      |      |      |      |           |
|----------------------------------------------------------------------|---------------------------------|------|------|------|------|-----------|
| <b>115</b> den_population <39592.585 (p62)                           | ave_waiting_period <4.075 (p22) | 42.7 | 0.32 | 10.6 | 0.08 | 4.796E-05 |
| <b>116</b> prop_over65 >0.163 (p51) &den_population <28746.747 (p55) | ave_waiting_period <4.183 (p26) | 21.5 | 0.53 | 10.4 | 0.17 | 0.0002337 |
| <b>117</b> med_area_home >17.644 (p50)                               | ave_waiting_period <4.102 (p23) | 32.2 | 0.35 | 9.2  | 0.10 | 0.0001486 |
| <b>118</b> POI_pp_telecom_elec >15.395 (p57)                         | ave_waiting_period <3.650 (p14) | 20.2 | 0.27 | 8.7  | 0.11 | 9.833E-06 |
| <b>119</b> POI_pp_transport >39.683 (p60)                            | ave_waiting_period <3.633 (p14) | 17.2 | 0.25 | 7.2  | 0.11 | 0.0002353 |
| <b>120</b> POI_pp_edu >14.015 (p63)                                  | ave_waiting_period <3.640 (p14) | 16.3 | 0.24 | 6.4  | 0.10 | 0.0002096 |
